# Supplementary material for: A 1,681-locus consensus genetic map of cultivated cucumber including 67 NB-LRR resistance gene homolog and ten gene loci
Source: PubMed Central journal article supplement (PMC3626583; doi:10.1186/1471-2229-13-53), 2013-03-25
Supplement: 1471-2229-13-53-S1.pdf [file 1471-2229-13-53-S1.pdf]

## Additional file 1

Seventy NBS-containing R gene DNA and protein sequences from the Gy14 cucumber draft genome (fasta format)

>Cucsa.017450

```
ATGCTTGGGCAACGGTATTTTCTTGTGCTTGACGATGTTTGAACGAAAATTCCTTTCTATGGAATGAGTTGAAATGTTG
TTTACTCAAGATCACTGAAAACCTAAGAATAGTATTGTTGTGACTACAAGAAGTGTGAAAGTTGCAAAAATCATGGAAA
CATGTCATAGTTATTTTTTAAAGTAAATTATCTAATGATCATGTTGGTCCCTATTTAAAGAAAGTGCAAAATGCATATGGA
TTATCCAATGACTTCAAACCTGGGGATCGTTCAAAAAGACAATGTTTTTCTTATTGTTCAATTTTTCCGAAGGATTTTGT
GTTTGAAAAACAAGGACTAGTTAAAATATGGATGGCACAAGGTTTCTTCAACCACAAGAAGGAAGAAATGTGACGATGG
AAAATGTAGGAGACATGTACTTCAAGATCTTGTGTGACAGTGTCTTATTTCAAATTTCAAGTAATTTCAATGAGATTTAAA
TTCCAGAATCTATTGTTTCGCTTCATAAATTTGCAAAACATGGAAGTTCCACTCAAAGATTGAAGAATTTCCGATGAA
CTTTACAAATTTGGCAAGTTTAAAGGCACCTTGAATTTGGGTAAGTTCTGACAAAACGCCTCTACATTTAAGTCGTTTGA
CTCAACTTCAAATATTGTCTCATTTTGTAGTCGGGTTTAAAAAGGTTGTAAGATTACTGAATTTGGGTCGATTGAAAAAC
TTGCAAGGTAGTTTGTGCTTTTGTGTTTCGGAGAAAGTTGAAAGTAAAGAGGAAGCCAATGGAGCAAACCTTGGCAGAAAA
GGAGAATTTAAAAGAGCTGCACTTGAATTTGGGATATGGAAAGAAAAGATAACAACAGTTACAATGATTTGGAGGTGTTGG
AAGGACTTCAACCAAAACAAAATCTCCAATCATTAATAATCCACAGCTTTGCAGAAAAGACGTTTGCCTAACAAAGATTTT
GTTGAGAATTTAAGAGTGATACATTTGTATTCATCTTTAATTTGTGTAAGCTTCCAATGCTTGGACAATTTAAACAACCT
AAAGGAACCTTGTAGATTTACAGCTTCTTGGTGTCCGAATTTAGACAACAGGTTCTATGGTAATGATCCAAACCAAGAA
GGTCTTCCAAAAGCTTGTAGAAATTTGTAATGTATGAGATGATCAACTTAGAGCAATGGAAAAGAAATAAGTAGATGTCTT
AAATTATTTAAACATTTCCAAAAGTTTCTATGAAAATGATATGAGAAATAAGTCGAAATTTGTGTTATTTAAACATTTGGTCC
GTTGAGGAAGCTGCCAAAAGATTTATGTCATCTCATGAATTTGAGGGAAAATGGAAATCGTTGGAAAATATGCATAATTATG
ATTTTGGCATCCTTCAGCACCTTCCCTTCCCTTAAACAAAATTACTTTAGTCGAGGATGAGTTGAGCAACAATAGTGTAAACG
CAAATTCCTCAACAACCTCAACACCTCACTGCCTTGGAAATTTCTGTCCATTTAAAAATTTTGGAGGCATTGAAGCTTTGCC
AGAATGGTTAGGAAACTTTGTATGTTTGGCAAACACTCGGTCTTCTAATTGCAAAAAAATTGAAAAAATTGCCTTCTACAG
GAGCAATTCACGTCTCACCAAATTTAAAAAATTTGATGCTTATAAATGTCCACAGCTACTTTGACGAAGAAAAAAA
AGATAG
```

>Cucsa.017460

```
ATGGCTGAGTTCTTATGGACTTTTGTGCTGCAAGAAATTTGAAGAAGGTCCTAACTCTTGTGGCTGAGCAGATCATTCT
AGCAAGGGAGGTCAAGGATGTGCTACAACAACCTACAAAAAGAGCTAGTTGAGTCTCAAAAAATGTTAGTGCTATCACTA
CCCAAAGACAAAATCATTATTCACCAGATAGCTTAGTGACTCAGTGGGTGAATGATCTTCAACTTATTGTTTCATGAGGCT
GACGACTTGTGGATTTTATATTGAATAAAAAATCAACCCATCGAGAGGTTATGGTCTGTGATCTCTTTATCTTGCCTGCT
ATATTCTTCAAACCTGAGACTAAAAAATGAAGGAAATTTATAGCGTTGTTAAACAACATTTGCACCAAATTAACCTCACT
TACTTCAACTTGAGCCTACACCTCAAACATTCAGAGACTGAAGTTGCGCAAATTTCAAGAGACAGTCTCAAAGCCTGAA
GATTATGTGGTGGGAAGGAACAGGGAAGTTGAAACCATAGTTGATCGAGTGATTGATGCCAGCAAACAGGAACTCAATTC
TATTTTACCCTGTTTGGAAATGGGTGGATTAGGAAAAACCACTTTGGCAAAGTCGGTCTTCAACCATGATAGGATCAAAA
ATCATTTTGGTATCACTATTTGGATATATGTGTCAACCTTTTGTGTCATCAACAACATTTTGAAGCAATCTTACAAAAG
GTGGAGGTTCACTTAGTGATTGCTCCAACAATAGGGAGGCCTTACTTGAAGAAGCTTACAGAAAACATGGGAGAGAAAAC
ATATTTTCTTGTCTTGCAGATGTTTGGAAATGAAAACAAAATGTTGTGGGAGAAGTTGAAGGAATGTTTGTAGATATTA
CTCATATGTCAGGAAATAGTATTCTTGTCACTACAAGGAGCAGTGGAAATGCAAAAATGATGGAAGAAAATATTGGAAGT
CATGAATTAAGAAAATTTATCTGATGACCAATGTTGGTCAATATTTAGGAACTTTGCCAATGCCAAGGATGTACCAATGAC
TTCCAATTTGGAGTTTGTGCAAAAAGAGTTTGATAAAAAGAAATCGGTGGTCTTCCATTAATCGCTAAAGTTTGGGAGCAG
CAGTTCATTTTCAAGGAGACCATGACCAGTGGGTAGCAAAATATAAAAAGCGTTCTAACAACTCCAATAAAAAGAGGAAGAG
TTTGTAAATTCACATTTGAAGTTAAGCGTTGATCGTCAACAAATGCTTCAAGTAAAGCAGTGTTTTGTCTTATTGTTCAA
TTTTTCCAAGGTTTGTGAGTTTGCAAAAAGCAAGTGATTGCAATGTGGATGGCACAAGGATTTACTCAACCAGATGAAA
GAAACAATGAAACAATGGAAGATACAGGAGAAAAGGTACTTTAACATCTTGTGTCTTTCTGCTTATTTCAAGATGTTGTT
AAGAATGAAAGAGGAATAATGAGAAGGTTGCAATGCATGATCTTATACATGATATTGCTGTCAAGTTTCAAATGATAA
AAAGTTGCGAATAGATCACATCATTTCATCAAATTTGAAAAGATTGGACGAAAGATGACAAAATCTTGTGAGCAAGTTAC
GAACAATAAATTTTTATGATCGTCATCATGTGGTGGTTCCAGGATAAGATTGGGGACTTTACTGGTTTGGCGTGTTTTGACA
ATTGAAAATTTATTTGTTGAGGAGTTACCAAATCAATATCAAGTTGAAGCACTTGAGATATCTAGACATTTTCGTATTG
TTATTCAATAAAGAGCTTCCGTAATCTATGTTCTGCTTATAAATTTGCAAAACACTGAGATTTCACTCTTCACTCAAGG
GATTTCTACCAAAAAACGTTGGACAAATGATTTAGTTTGGAGCATTGGAGTTCTCATCTATCGATAAACAAATGTCTCCC
TATTTGAGTCAATTTGATTCAACTTGAACATTTGCCTAAATTTGCAGTAGGTTTGGAGAAGGTTGTAAGATTACAGAAC
TGGGGTTCTAAGAAACCTGAAAGGTTGTTGAAGCTTCAAGTTTAGAACATGTTGAAAGTAAAGAAGAAGCCGAAACTG
CAAAATTTAGTGGAAAAGGAGAACTAGAGAAGTACATTTTGTGTGGACAAAAGGAAAGGAAAGAGAAAAGTAGAGAATAAG
AATGATTTGGAAGTGTGGAAGGACTTCAACCACCAAAAATGTAGAATAATTTGAGAATCAAATACTTTTLAGTGGGTG
TTTACCAACCAGAGCTTTGTTGAGAATTTAGTGAAAATAGAGCTAAGAGATTGTGGAATTTGTGAGAAGCTTCCAAGG
TTGGGCAATTAGGAAATCTAGAGATACTTGATATTTTCATGGTTTGAAGAGTAAAGAGTAAAGAGTATAGGGAATGAATTCATGGA
AACAGCTCCAACAACCAAGGAGTTTATTTCCCAGGTTGAAGGAATTTGATGTTGATGAGATGAGGAGGATAGGAGAATG
GGAAGAAGTGGGAAGTAATGTTAAAGCTTTCCACGCTTGAACGTTTGTATATTGGTTGTGTAGAGATTTAGTGAAAA
```

TTCCAGATGTTTTTGGGTATTGTGATGAGTATGGTGAGAAGCATCTGGAAGTTGTGGAAATTATTGAACATTTGTG

>Cucs.a.017490

ATGGACATTTTGTAGTTTTCAGTCATTGCAGCAACAATTAACCTATTGGACATCAATTAGGT  
TACCTTGTGTTGCTATAACAGAAACAAGAAGGAGCTTAGAGAACAACCTTGAAAATCTTGAG  
ACTACTAAAAAGGATGTGAATCAAAGGGTTGAAGAGGCAAAAGGCAAATCGTATACAATC  
TCTGAGGAAGTTTCAAAGTGGTTGGCCGATGTGGATAATGCAATAACCCATGATGAGCTA  
TCCAACCTCCAACCCATCTTGCTTTAACTTGGCTCAACGATACCAGCTAAGTAGAAAAAGG  
GAGAAGCAAGTGAATTATATCTTCAACTCATGAACAAAAGAAACAGCTTTGTGCGAAGTT  
GGATATCGTGCACCTCTTCCGGATACTGAGAATACTGTTGTTCCCGGAGATTACCAAGTT  
TTGGAATCAAAAACCTATTATGGCTAAAGATATCAAGAATGCGCTTTTGGAAACCTGAGGTC  
AATAAGATTGGTGTATATGATGATGGCAGGTGTTGGAAAACTATTTTTCTAACGAAGTT  
AAGAAATTGGTGTGAAAGGGGAAGACAGATTGTTTATCGAGTTATTGATGTGCGTGT  
GGTTCGATTTAATGATGTAACAGACATACAAGAACAATTTGGTATCAATTGAACGTAGAA  
TTGCCAAAAAGTAAAGAGGGGAGAGCGTCTTTTCTACGGAATAATTTGGCGAAAATGGAA  
GGTAATATCCTCATTTTTATTAGATGATTTGTGGAAGGAATATGATCTTTTAAAAAGAGATT  
GGGATTTCCATTAAAGTAAAGATGGATGTAAGGTACTCATTACAAGTCGATCACAAGATATA  
TTAACCAATAAATATGAATACACAGGAGTGTTTTCAGGTGAGTTTCGTTATCTGAAGAAGAG  
TCTTGGAAAGTTTTTATGGCAATCATTGGTGATAAGTTTGATAACAATTTATAAGAAAAAC  
ATTGCAAAGAATGTTGCAAAAAGATGTGGAGGGTTACCGCTTGCACCTTGATACCATTGCA  
AAAGCATTGAAGGGGAAAGATATGCACCATTTGGGAGGATGCTTTAACCAAATTTGAGAAAT  
TCTATTGGAATGGATATTAAGGGGTGAGTGACAAAAGTTTATGCTTCACTTAGATTGAGT  
TATGATCATCTAGATGGAGAAGAAACAAAATTAATATTTCTTCTTTGCAGCGTATTTCCA  
GATGATTTATAAGATTTCTATAAAAAATTTGCAAATGTATGCCATGTGTATGAGATTATG  
AATAAAGTAAAAAATTTGGGAGGATTCAAAAAATAGGGTCATGAAGTTGGTTAATGATCTA  
ATATCGTCTTCTTACTTCTCGAGGCTGAGAGCGATTCAAAAAGACAAGTATGTTAAAATG  
CACGATGTGGTTTCGTGATGTTGCGATACACATTGCATCCAAGGAAGGTAACATGTCTACA  
TTGAACATTGGATATAATAAAGTTAATGAATGGGAAGATGAATGCAGAAGTGGTTCTCAT  
CGTGCCATTTTTGCAAACCTGTGATAACTTAAACAATCTTCCCCTAAAGATGAATTTTCCA  
CAACTTGAGTTGTTGATATTAAGAGTTTCTTATTGGTTGGTGGAAAGATAATCTTCAAAT  
CCATATGCATTTTTTGGATGGAATGGTAAAGCTCAAGGTTTTGGACTTGACAGGAATGTGT  
TGCCCTCAGCCATTGTGGACAACACCATCATTAACAACCTTCAAGCATGTGTATGTTG  
CGTTGCCAATTTAACGACATTGATAACAATCGGAGAGCTAAAAGAACTGGAAAGTTTTGAGA  
ATCGTTAAGTGAACATGCTAGATCACTTACCTCCAACATGAGTCAATTGACACACCTT  
AAGGTACTAGAAGTTTTAAATTTGCCCTAAATTTGGAGGTGGTTCCTGCAAACATTTTTTCA  
AGTATGACAAAACCTCGAAGAATTGAAATTAACAAGACAGCTTTTGTAGATGGGGAGAAGAA  
GTATGGTACAAGGATCGATTGGTCAAGAATGTCACAGTTTCAGAATGAATGTCTGCCA  
TGCTCATTAATTTAAGTTTAGAAAGTTGGAATGTTAAGATTCATCTGAAATAAGTTCA  
CAAACCTGTAAAGAAGTTAAAAGAATTTTGGATTTGTAGTAAATGAATCAGATGATTTTTAT  
CAACCAAGGTTTCTAATGAATATGCAAGAACCTTGATGCTTAACATTTGAATCCCAAGTT  
GGTTCAATTGATGAAGGACTTGAAATACTATTGCAAAGAAGTGAGAGATTGATTGTAAGT  
GATTCAAAGGTAATTTTTATAAATGCAATGTTCAAGCCAATGGAAATGGCTATCCCTGT  
TTGAAGTATCTATGGATGATTGATGAAAAATGGTAATTCAGAAATGGCACATTTAATTGGA  
AGTGACTTTACTTCTCTAAAGTATTTGATTAATTTTTGGGATGAAGAGATTGGAGAACATT  
GTTCTAGGCATATTTCACTAAGCCCTTTCAAGAAGGTTAAAACCTATTGCAATTTCAATTT  
TGTGGGCAGATAAGGAATCTTTTCTCATTCTCTATTTTTTAAAGACCTTTTAGATCTTCAA  
GAGATTGAGGTGATTAATTTGTTGTAAGATGGAAGGGATTATATTCATGGAAATTTGGAGAT  
CAACTCAACATTTGCTCTTGTCTTTAACTCTTTTACAACCTGAAAATGTGGATAAACCTT  
ACAAGTTTTTGCACCAAGACTTAATCCAAGAAAGTTCAAAAAGTATCATTTCCCTTTTTT  
GATGGTCAGGTTTCATTTCTGAGTTGAATGATTTATCAATTTGTTGGAGGTAACAATTTG  
GAGACGTTATGGCATAAAAAATAATAACCAACTACAGTTTTGTGGTCATTGAATGAGTTG  
CATTTACTCAATCTACCAAATCTCAAACCGTATGGAGAAAAGACATCATCAAATTTTTG  
ACATTTCCATCTCTAAAGAGAGTAAAAATCCATGGCTGTACTAAGCTAACACACGTCTGG  
AAGGACAACAATAAAGTAACCAGAAGCTTTGATAGCTTGGAGAGGATTGAAGTAGAAAAA  
TGCAAGAATTTGAAGTATTTACTGCCATCATCAATTGCATCTTAAACCTGAAGGAGCTT  
CACATCAAGAAATGTAATGGAAATGATCAATTTGTTTCAGCTCTACAGTGACAAAAAGCTA  
GTGAATCTCAGCTCCATTAAGTATCTTATTTGTAAGGAATGAGATGCATGGTTGAAGTA  
GATCAAGCAGAAAATGATGAAATTTACTTTTCAAGAAATTTGAGTACGTTGGAATTAGAT  
TATTTACCACGATTGGATAGCTTTTACTCTGGCAAATGCATGCTTGAGTTCCCTGTTTG  
GAGAGTTTGGTTATAAAAAGATGTCCTGAAATGAAGACATTTTTCGTATGGAGTAATAATC  
GCGCCAAGATTACAAACCTTGTGGATGAACGATAAAGAATTTGGAGTATCATCACCAGCA  
TGTGGGATAAATGAAACCATACAAAATTTTCCGAGGCGAGTGGTATGTATGTTCAATTTCT  
AATTA

>Cucsa.017500

TTACCCACGTCATGAGTGAATTGAAAAAECTTAAGGTATTAGTTGTGTTGGATTGCTCCAATTTGGTGGTGAATTCACAA  
AAACATTATTTCAAGCATGACAAAATTAGAAGAGTTGGATATACAAGGCCGCTTACGAAATGGAGAGAAAAAATTGTTT  
CAGTCAACCCGACGAAACTTAGCATATTATTAGAAGGTGCTGAAGAGTTGGTGATTGTAATGACTCCAAGGGTTTTGCA  
AATAATATTTTTAAAGCAATTGGAAATGGTTATCCCTGTTGAAGTATCTTAAAATCTTTGAGAATTCAGAGACACCACA  
TTTGAGAGGAAATGATTTACACATCTTTGGAGTGGTTGGTTCTTAAAGGAATGGTGATGTTGGAGAGTATAGTTCCAAGGC  
ATTCTCCAACAAATCCTTTCAACAACTTAAAGTTGTAGAATAACAAGGTGCAAGCAGCTGAGGAATTTTTTTTCACTC  
TCTATTTTTAAAGGGCTTTCAAATCTTCGAGAGATTAAGATCTCTGAATGTGATATGATGGAGGAGATTGTATCAATAGA  
AATTGAAGATCAGATCAGATTTGCACCTCTCCTTTGACATCTTTACACATTTGTCTATATGAATAAACTTGAAGTTTCT  
GCAGTACCAAATCATCCATTCAACAAACAATTTGTTCCGTTCTTTGATGACGACGGGTTTCAATTTCTCAATTTGGAGGAT  
TTATCAATTTTTAGAGCAACAATTTGGAGATGCTATGGCATAAGAATGGAACCTTCTTTTCCAACCTTCAACACAGTAGA  
GATTAGTTATTGCAAGAAGTTGAGATGCGTTTTTTCCTTCAAATATAGTGACGTCACCTGTCTCTTTAGATACATTGGAAA  
TCAATTGTTGTGGGTTATTGAAATGATATTTGAAATTTGAAAAGCCGAAGACTTCGTGTGATACAAAAGTAGTGGTGCCA  
TTGAGACACTTATATTTACAGTTCTACCAAGTTTAAAGTACGTGTGGGACAAAGATGGTGACGATGTTGTGGCGTTTCC  
AAATCTAAAGAAAGTTGAGGTTAGTCTGTTGCTTAAGTTGAGAAGTATTTTTCCACCTTCTTCAACAAATACATGAAAG  
AAATGAAGAATTAATAGTGAGGATGAGCCAATATTTCCAGTGGAGGATGAAGCATCAAAGTTAAAGAGGTTGCATTTG  
TTCCAAGCTTGAACCAATGAAAATGAGTTGTAAGGAGTTGTAGACGAGAGGTTTTGGGTTATGTTCAAGTTTTCCAA  
ACTCAAACGCTTGAATTTGGTTGGTTGTGAAGATGATGATGATGATGATGATGATGATGATAAAAATGATTAGCTTGGCGA  
TGAAATGAGTGAAGTATCATAACGATTTGAAGAATTGACAATAGAGGATGCCTCCAGCTGGTACAAGTATTTGAAAT  
GACTCTTATATCCAAGATGTGCAAAATTTGAAGAATGAAATGAAATGACTGCAACCACATCTCCAAGTTGGTTGATCT  
TCAAGTACATGATTGCAATGGAATGATAAATTTATTTAGTCTTTCAGTGGCAAAGAATCTAGCGAATCTCAAGTCCGTTG  
AAATATGTAAGTGCAGAGAAATGACATCCATAGTTGCAGCAAAAAGCAGAGGAAGAAGAGGAAAATGTTGAAATTTGCTTC  
AACAACTAACAAATATGGAATTTGATAAATTTAGAAAGATTAGAATGGTTTTACTCTGAAAATGCAGATTTGAATTTCC  
CATATTAGATACGTTGAGGATAGACAAAATGCTATGACATGAAAATCTTTTCATACGGAATTAACAAACACTCCCACCTTG  
GAAAAGATCTTGATTGGAGGTTGGAACCTCTCTATTCCAATACTACCAACACAAGGGATAAATGA

>Cucsa.041670

ATGGATTCTGATGGGGTTGAATCAGAATCTACTCCGGCTATTTCCACCTGTCTCACCATTAAAATAGCTCCAACCTCCAG  
TAAACCCCGGGGACGCTTCCGATTTGGCATTGCGGGAGCTCAAAGCTCAATCGAATCATCTCCTTATAACTCCCCTT  
CCCTTTTATCGCCCGCTCATCGGCGTTTGTTCGGCTTTGCAGTCGCGGTACATTTTCGCGAGGGCGGTGCTCTTAA  
CCAGAAGAGAAAGCCTATTTCCGGCGGAGACCGCGCGCTGACTTGTCAATTCACCGCTGGTTTTCCCAATCTGAGGATAT  
TCCGAGTAGTTCTACACTCCTCCCTCGGACCAATATGAATATTCGATGACCCTTCTGATTCTAAGGTTCAAGTTTGTCTG  
CCTGTGTTCCGGTCCCGACTCCGCCCCGCTCGCATTTCGTTCTCCTTCCCGGTTCCCTCGGACCTCCTTCGCCAAATGC  
GGCGCCCCCTCTCTCCTGTTTCCACCTTAAACTCAGAAGCTGTGATGTCTACATTGGCTTTCATGGCCAAGCTAATGG  
CTTGATACGCTTCTGTAAGTGGCTCAAATCAGAACTTGAACCTCAAGGAATTTGCCTGCTTCAATTGCTGACCGGTCCAAGT  
ACTCCGATAACCAAGCTCAGAGATCGCTGACCGGTTTACAGTCAAGTAACTTTCGGAGTCGTCTGCTCACAAGCTCT  
AGTTTCCATAACCAATTTCACTTGGAGGAGTTGAGATTCTTTGCACAGAAGAAGAACTTGATTCCATTTTTCGACAT  
GGAGTCGTCCGAGATCTCAAGCTTTCTCACTATAATTTCCATGGATAAAGAGTACAAAGAGACAGTGCAGGGATTGTTGA  
GGTTCATGAATACAAGTTGGAAGCCAATGAAGGTAATTTGGAGAAGCTGTATAGCTAAAGCGGCTGGGATTTTGGGGGA  
AAGCTTTGGGAGGATGAGTACTGAAAGTATGTTGAAAGATATGAGGAGCTGCCATTTCCAAGAAACAGATGCTTTTTTAGG  
GAGGGAAAAGGAGATTATGAAATGGAAGCTACTCTGTTTGGTAATCGAAGCTATCACAAGCAAGACGGTACGGTTTTCTA  
CTCTGATCGTTGAAGGGAATTCAGCCAGCAATCTGAAGGCTTAGCAGATGAAGAAAGTGAAGCCGTTAGTGTGAGGGGA  
AGTATGTTCAATTTGGAGATAGGGAGGCTGATAATCCAACCTTTGGAGACATGGATTGAACCAAGTAAAGGAAGAAA  
TTCATTTCAAGAGATCGAAGCACAAGAAATGGTCAAGAGTGGGAATCACAAGAGCATGAGCAGCAGTATGTTGCATCA  
ATGGAACCCCTGGAATTTGGAAGACAGAACTTGCTCTGGAATTTGCTTATAGATACTCCCAAAGATACAAGATGGTTTTTA  
TGGGTCGGTGGTGAAGCTCGGTACTTTTCGACAGAATATATGAACTTATCTTTGAACTTAGGGTTAGACATAAGTGTGTA  
TGCTGAAAAGGATAGAGGACGGTTTCGGAGTTTCGAGGAGCAAGAACAAGAGGCATTCAAAAGAGTCAAGAGGGAGCTGT  
TTGGAGACATGCCATATTTGTTAATCATTGATAATCTTGAGGCAGAAGAGGACTGGTGGGAAGGGAAAGATTTGAACGAT  
TTGTTGCCGAGGAACACCGGAGGATCCCATGTGATCATCACTACGAGACTCTTAAGGTGATGAGTTTTCCGGATGATTA  
CATTCACTCATTGGCTTTGGCTGATGCAATGGTTTTGATGAGAGGAAGAAGGAAGAAGAATACCCAGCAGATGAATGG  
AATATCTGAAGAAGTTTCGATGAGAGGCTTGGGAGATTGACATATGGACTTTGGGTGATTGGATCGCTGCTTTCGAGCTT  
GCAATCACCCCGTCTTCTCTTTTTGAAGCTATTGAACAAGTACCCATCGATGAATGTTCTCCCTGCCCTTATATAAGCAT  
AAACGAAGAGCACTACTGCAAAAGCAATCCCTTCTGATGAAGATCATTTACTTTTCTTTTTCCATATTTGGAGCAACTA  
ATGGACCGTTAGCATCCGGAATATTTCTGGTTCGGTGCCTGCTCGCCCCAGCACCCATCTCAGTGTCTGTACTAGCCACA  
GCAGCAAAGGATATGGCTGTCTCAAGAAAAGGGTTTTAAAATTTGGAGTAAATACTTGAGTTTCATGTTCCGGTTGTTGCTC  
CACTTGTTTAGCTTCAAGCTTGAAGAGTGAAGGAAGATCAGTCTTCTTCTGATCAAGTTCGGGCTCGCCCGAAGG  
CGAACAAAGCAACTGGTAGTTGGATCCAATTTCCATCCCATCAACTCAAGTGTTTGCCAAAAGAAAGGAGGTTTTATCAGCT  
GCCAAGTCTATAGTTCAAGGATAAGGAAATGTAGTAGTAACACAATGGCAAACTTGGATCATTTATGGGCATCTGCATT  
TCTCGTTTTTGGTTTTCAAATCTGAACCTCCATTTGTACAATAAAGGCTGTTGATATGGTCTTATACATAAAAAAGGCTG  
CCCTTCTTTTGGCGATTTCGGGCTTCCAAACCTTTTCGAGATGTAACCTCAGCACTAGAATTGCTAAAGGATGACACAAAT  
GCACTTGAAGAGTAGAGAAGTCAATTTGTATCACAATAACAAGACTGGTGTGAAGGTTCTTGTGTTGGAGAAAAGGTT  
CCAAGGCTATCAACGAGTTGATGAATACGTGTGGCAAGATGTGACGTTGCTAAAAGCTACATTGCTTGAACCTCGAGCGA

AACTACTACTAAGAGGTGGACACTTCGACAGCGCCGAAGAACTATGTAGAACTTGCATAAGTATAAGAACAGTCATGTTG  
GGACATAACCATGCTCAAACCTTGGCAGCACAAGAAACGTTAGCGAAGATTGTTCCGGCTTCGGAGCAAGATCTGA

>Cucs.088220.1

ATGGACATCCTTGTTCAGTCACTGCAAAAAATTGCTGAATACACAGTTGTGCCGTTGGACGTCAGCTTGGTTATGTAAT  
TCACATTTCATGCCAACTTTCAAAACTTAAGACTCAAGTAGAAAAAGTTGAAAGATACAAGAGAATCTGTGCAACAAAAACA  
TCTATACTGCAAGAAGAAATGCTGAAGACATAAAACCTGCTGTTGAGAAATGGTTGAAAAACGTTGATGACTTGTTCGA  
GAATCTGACAAGATATTAGCCAATGAAGGTGGACATGGTAGACTGTGTTCCACCAATTTAGTCCAACGACACAAGTTAAG  
TAGAAAAGCAAGCAAAATGGCGTATGAGGTTAATGAGATGAAAAATGAGGGGAAGGTTTTAATACGGTCTCCTATAAAA  
ATGCTATTCATCGGTTGATTGTTTCACTGCAAAAAAGTATCTGACTTTCTTGACTTAGACTCAAGAAAATTGACTGCGGAA  
CAAATCATGGATGCCTCTCTGATGATAAATGCCATAGGATTTGGAGTGTACGGGATGGGGGTGTTGGTAAAAAATGTT  
AGTGAAAGAAATTTTAAAGAAAATTTGAGAGTAAGTCTTTCGATGAGGTGGTAACATCCACGATCAGCCAAACACCAG  
ATTTTAAAAGTATTCAAGGCAAACTAGCTGACAAGCTAGGTTTGAATTCGAACGAGAAACAATAGAAGGAAGGGCACCT  
AGTCTACGAAAAGGTTGAAGATGGAGAGACGTATCCTAGTTGTGTTGGATGATATCTGGGAGTATATTGATTTGAAAC  
AATAGGAATCCAAGTGTGAAGATCATAACAGGATGCAAGATATTGTTTACCTCTAGGAATAAACATTTGATCTCAAATC  
AAATGTGCGCCAATCAAATTTTGGAGATAAAAGTTTGGAGAAAATGAGTCATGGAATTTATTTAAGGCAATGGCTGGT  
AAAATGTTGAAGCAAGTATTGAAGCCTATAGCCATTCAAGTTGTGAGAGAATGTGCAGGTTTGCCTATTGCTATTAC  
TACTGTTGATTAAGGCATTACGAAATAAACCTTCCGACATTTGGAATGATGCCTTGGATCAACTTAAAAGTATTGATGTT  
TTATGACAAAACATTTGGAGAATGGACAAGAAAGTATTGTTGTCATAAAAATTGAGTTACGATTGCTTGGGATATGAAGAG  
GTCAAGTTATTATTCTTGTATGCAGCATGTTTCCAGAAGACTTTAGCATTGACATGGAAGAGTTGCATGTATATGCCAT  
GGGCATGGGTTTCTTACATGGTGTGATACTGTGGTAAAAGGACGACGTAGGATTAAAAAATTGGTTGACGATCTTATAT  
CTTCTTCTTTGCTTCAACAATATTCTGAGTATGGGTACAATTATGTGAAAATGCATGATATGGTTTCGTGATGTAGCTATA  
TTTATTGCGTCTAAGAATGATCACATACGTACATTGAGCTATGTGAAAAGATTAGATGAAGAATGGAAGAAGAGAGACT  
ATTTGGGTAATCATACCGTGGTGTCCATTCAATGTTTACATTATCCTCTCCCAAAGTTAATGTTACCCAAAGTCAATTAT  
TAAGGTTGGATGGACAATGGTTGAATAATACGTATGTGTGAGTGGTACAACTTTTTTTTTGAAGAAATGAAAGAGCTCAA  
GGTTTAGTATTAGAAAAATGAATATATCCTTGTGCAACGACCATTTGATCTTTACTTCTTAGCAAACATTAGAGTGT  
ACGTTTACGGGGATGTGAATTAGGGAGCATAGATATGATTGGTGAATTA AAAAGGCTTGAATTTCTCGATCTTAGTGGAT  
CTAACATCATCCAGATTCTTACAACAATGGGTCAATTGACACAACCTGAAAGTGTAAATTTATCTAATTGTTTTAATAAG  
CTCGAGATAATTCACCAAATATTCTTTCAAAGTTGACAAAACCTGGAGGAATTACGTATGGGAACTTTTGGTAGTTGGGA  
AGGAGAAGAAATGGTATGAAGGAAGGAAAAATGCTAGTCTTTCCGAGCTTAGGTTCTTGCCACACCTTTTTGATTTAGATT  
TAACCATTCAAGATGAAAAGATTATGCCAAAACACTGTTTTCAGCAGAGGAGTTGAATCTTGAAAAATTCACATTACT  
ATTTGGTTGTAAGAGAGAAAGAGTTAAAAATTTATGATGGAATCATTAAGATGAACACTCTAGAATATTGGAAGTCAAGAT  
GGAATCAGAAATGTGCTTGGATGATTGGATAAAAATTTTTGTTAAAGAGGTCAGAAGAAGTGCATTTAGAAGGATCAATTT  
GTTCAAAGGTTCTTAACTCTGAACTGTTAGATGCAAATGGCTTCTTACATTTGAAGAATCTCTGGATTTTTTATAATTCA  
GACATTCAAATTTTATCCACGAAAAGAACAAGCCTTTGCGAAAATGCTTGTCCAAATTTGGAGTTCTTATATCTTAAGAA  
CTTGGAGAATTTGAAAGTGAATTCATGGTTATAATCATGGTGAATCTCCTTTAAACAATTTGAAGAATGTAATCGTAT  
GGAATTTGCAATAAATGAAAACCTATTTTTGAAATGCAATGTTGGATGACGTTTGAATCTCGAGGAAATTTAGATCAAT  
TATTGTA AAAAGATGGAAGTATGATGATCACTGTGAAGGAAAATGAGGAGACAACCAACGCTTGAGTTTACTCATTGAA  
ATCTTTATGTCATGACTTTTACCACAACCTTCATAAATTTTGTCTCAAAGTTAGCAATACCATCAACACATGTGAATCAT  
TTTTTCAGTGAAGAGGTATCGCTTCTTAATTTGGAGAAGTTGAAAATTTGGTGTACAAAGGATTTGAAGAAGATATGGAGC  
AATAATGTACTCATTCCCAATCTCTTTTCAAACCTTAAGGAAATAGACATTTATTCATGCAACAATCTTCAAAAAGCATT  
GTTCTCTCCAAATATGATGACATTTCTTACTTGCCTTAAAGTCTAAGGATTTGAAGATTTGAAATTTGTTGGAAGGAATAT  
TTGAAGTGAAGAGCCAATTAGTGTGTTGAAGCAAGTCTATCGCCCTCCAACTTTGAGTGTGAGTTGAAACTATATAAA  
CTTCAAACCTTGTAGTACGTATGGAGCAAAGATTCTGTGAGCTTCCAGAGTTTGGTAAATATAAAAACGTTTAAACCATGGA  
TGAATGTCCAAAGACTTAGAAGAGAATATTCACTGCAAACTTCAAGCAACTTGAAGCACTAAGCATAGATATCAAAAACAT  
TGATGGAGGTTATTGGGAAGAAAAAGTGCACGGATTATAACAGGTTGGAATCAAAGCAATTTGAAACTTCTTCTTCCAAG  
GTTGAGGTTCTACAGTTGGGAGATGGTCTGAGTTGTTTCCGAAGCTTAAAACCTTTGAAGCTATATGGTTTTGTTGAGGA  
TAACTCAACCCATCTGCCAATGGAAATTTGACAAAACCTTATACCAATTTGAGAAGTTTGAATTAGAAGGAGCATTTATTG  
AAGAAATTTCTCCAGCAACATATTGATTCCTATGAAAAACAATACAATGCAAGACGATCTAAAACCTTACACGCGTAGT  
TGGGTTCTATCCAAGCTACCGAACTTAGGCATTTGGGGAGTGAATGCTCACA AAAAGAATAATGATTCAATTTCTACAAGA  
TCTGACCTCTGTCCATTTGAAATGTGGTGGATTGAGTAGTTTAGTGTATCATCGGTGCTTTTACGAACTTGACGT  
TTCTTAAATTTGAATAAATGTGATGGACTAACCCATTTGCTGGATCCTTCGATGGCTACAACGCTTTGTGCAACTTAAACAG  
TTGAGAATAGGAGAATGCAAAAAGGATGAGTCGTATAATTGAGGGAGGATCATCAGGTGAAGAAGATGGAATGATGCATC  
ATTCATTTCCATGTTTGA

>Cucs.089350

ATGAATCGAGCAAGTGGATCATCTTCTTCTCACCTTTTTAGATGCAGTTTTGATGTATTT  
TTAAGTTTTCTGGTGAAGTACTCGTTCCAACCTTACCAGTCATCTTAATATGGCTTTA  
CGTCAAAGAGGAATCAATGTTTTTATAGATAACAAGATTTCAAGGGGTGAAGAAATTTCT  
GCATCTCTTTTGAAGCTATTGAAAAATCCAAGATTTTGTATCGTTATAATCTCTGAAAAT  
TATGCATCTTCAAGTTGGTGTTTGAATGAACTAGAGAAAAATCATTATGTGTAACGAATTG  
AGATCAGGACAACCTGTTTTTACCAATTTTCTACAGAGTGGATCCATCTGAAGTAAGAAAA  
CAAAGTGAAGATTTGGAGAAGAAATTTGGGAGACTCGAAGTTAGATTCTCGTCGGACAAG

ATGCAAGCATGGAGGGAGGCCATGATTTATGTTTCTCAGATGTCTGGATGGCCGGTTCTT  
CAAGAAGAGTATTTTTCTTCTTCACATATATCTTTTTACTCATTTGCTCTTCATATTATA  
TCGTTACTATACTTCCACTATATTTTCATCAAGTGATGAGGCCAATTTGATTCAAGAAAT  
GTTCAAGAAGTCTTTAAGAAATTAATCGTGAATAATAATGCAGTTGCGTATACCTAAA  
TATCCAGTTGGAATAGACATACAAGTTAATAATATACTCTCCAAATTTATGTCTGATAAA  
AAAATTGTTATGCTTGGATTATATGGAATTGGAGGTATCGGCAAGACAACCTTTGGCCAAA  
GCATTGTACAATAGAATTGCTCATGACTTTGAAGGTTGTTGCTTTTTGGAAAAAATTAGA  
GAAGCTTCAAATCAATATGACGGCCTTGTCAACTCCAAAAGAAAATACCTTTGTGATATT  
CTAATGGATAATTGATCAATGTTAGCAATCTTGATATAGGGGTTAACATCATAAGGAAT  
CGACTATGCTCAAAAAAATCTTTTAATCTTGATGATGTTGATACGAGAGAACAATA  
GAAGCATGACGGGAGGCATGATTTGGTTTGACATGGAAGTAAGATCATGCGACAACA  
AGAAACATGCAATTACTTGTAGTCATGGATTTAATAAATTTGAAAAAGTTAACGGATTG  
AATGCCATTGAAGGCTTGGAGCTTTTTAGTTGGCATGCATTCAACAATTGTCATCCCTCA  
AGTGATTATTTAGACCTTCAAACGTGCTGTACATTATTGTAAGATCTTCCATTAGCT  
CTTGAAGTGTAGGTTCCCTTCTTAATCTATTACGATCAATCCAAATTTGAACGTATA  
TTGGACGAGTATAAGAATCTCTATCTAGACAAAAGACATCCAAGATATTTCTCGAATAAGT  
TATGATGAACCTGAACAAGATGTAAGATATTTTCTTTACATTTCTTGTGCTTTGTA  
GGAGAAGATACTCAACGGGATGATTTGAAATGAAGTTAGAAGCATGTGTTGTTTATGTTTGGAA  
AAGGGAACAACAAAATAAATGAATTTTACTCTTCTAACCAATTGAATCCAAATCGAATTA  
ATGCATGACTTAATACAACAATGGGTGCTCAATTCATCTCGAAAACTTTTACATCT  
CATAAAAGAAAAGATTGTTGATTAAAGATGATGCTATGGATGCTTAAATGGGAATAAG  
GAAGCAAGAGCAGTTAAAGTTATAAAATTTGATTTTCCCTCGACCTACCCAACTTGACATT  
GATTCAGAGCTTTTGA AAAAGTGA AAAATTTGGTAGTACTCGATGTTGCGAATGTCACA  
TCTTCAAAGGTAAGTACTGATCTTGAGTATCTACCTAGTAGCATAAGGTGGATGAATGGCCT  
CAATTTCTTTTTCATATTTGCATACAAGCTTCACAATAGAGAACCTTGTCAAGTTCAAC  
TTGCCATATAGCTCCATAAAAAAATTTGGGAAAGCATTAAATGTGTGGTGAATGGTTGAAG  
GAAATTAATCTTAGTTACTCTAAGTTTTTGGTGGAAATTCAGATTTAACTACTGCAATA  
AACCTCGAAAAGTTGAATCTGAAGGGTGTGAAAATTTAGTAAAGGTTGATGAATCAGTT  
GGATCTCTCAGTAAGCTTGTGAGTTTTATCTTTCCAGCAGTGTGAGGGTTTTGAGAAG  
TTTCCATCTGCTTAAGTTGAATCTCTTGAAGCTTTGGTAGTGAGATATTGTAGAATA  
GAAGAATGTTGCTCAATTTAGTGAAGAAATGAATAGCCTAGAAATATTGGAGATCGAT  
GATAGTATAAATTAATCAATTTCAACAATTTCAACAATTTACTGCTTAAAGAACTC  
TGGATCACAGAGTGCACGAAGCTCGAAACTCTTCCAAAAATTTCTAAAGGTTCCAAAAGGA  
GTAGTTGATGATACTAGAGGGTGTGATCATTGGCCAAATTTCTTAAACAATCTCT  
GATTTTCATATCTTGTGATGATAATGTGGAATATGATACAAAAGACGGAGTAATCAAACAA  
CTCATATTAATGAATTTGTGATATTCCAGATTTGGTGCAAGTACAAGAGTATGAACAATTC  
GTAACGTTTGTATTTCTAGCTGATTTAATTTAAGTTGGAAAAGGAAGGCTTTTATTGCTCTT  
TGTGTCAAAATTTCAATGTTCAACAATGATCAGAGTTGGTTAAGCTTAAATTTGTTGAGTACTG  
TTTATCAACGATATTGAAGTATGGAGTCAATGTCATCTCAATCTTCAATTTTAACTTTTGGCTA  
TCACGAGGTGAATGTCTATGGATGGCAGTACTTTCATCTTGCATGCATCGTCTAATCAAC  
CCATATGGTGTGATATTATGGACATCTCACCGAATTTCTCAATAGGCATTTTGGACAAT  
AAAATTACATTTGTTATTTGAGGTTAATCCAGAGTGTAAGACACA

>Cucsa.091460

ATGGGTTCTTCTGTTGTTGGAGATGAATCATTTTCTTCTTCTCCCAATTTCAATTACGATTATGATGTGTTTTTTAGTTT  
CAGAGGAGAAGATACTCGCTCCAATTTTATCAGTCATCTTCATATGGCCTTGCGTCTAAAGGAAGTCAACGTTTTTCATAG  
ACGACAACTCAAAGGGGTGAACAAATTTATGAGTCTCTTCTCAAATTTATAGAGCGATCTAGACTTTCCCTCGTTATT  
TTCTCTAAAGATTATGCATCTTCAACTTGGTGTGGATGAACTGGTGAATAAATTGAGTGAAGAAATCCAAAGGACA  
AGCAGTTTTGGCCAGTGTCTACAAGGTGGATCCATCCGAGGTTGAAAACAAACCCTGGGTTTTGGGGAAGCATTGGCCA  
AACATGAAGCTAATAAGTTATTGGCCAACAAGATTCAACCATGGAGGGAAGCTTTGACTTTTGTCTGGTTTGTCTGGT  
TGGGATCTAGCAAATAGCAAGGATGAGGCTGAACCTATCCAAAAATTTGTTAAACGAGTGTGTCTGCAGTAAATCCAAT  
GCAATTACTACATGTAGCCAAGCACCAAGTAGGAGTTGATTTCTCGACTAAGGAAAATTTGAGGAGTTGGTCTCTCATATTG  
GGTCCGAGGGTGTAAATCTGGTGGGGTGTATGGCATTGGAGGCATTGGTAAAGACCCTTTGGCTAAGGCTTTGTACAAC  
AAAATTGCTACCCAATTTGAAGGATGCTGCTTTCTACAAGATGTTAGACGAGAAGCTTCGAAGCATGGGCTCGTTCAACT  
ACAGGAACTTACTCAATGAGATCTTAAAGAGGATTTGAAGGTTATTGTCAGTCGTGATAGAGGAATTAACATCATAA  
GAAGTAGACTGTGTTCAAAGAAAGTTCTTATAGTTCTTGATGATGTGAATGATCTTGAGCAATTAGAAGCACTGGTTGGT  
GGGCGTGATTGGTTTGGTCAAGGTAGTAAATCATTGTGACGACAAGGAATGAACATTTACTTTCTAGCCATGGATTTGA  
TGAAAAGCATAAAATTTCAAGAATTGAATCAAGCATGCTTTGAGCTTTTCAAGTTGGCATGCTTTTAAAGAAAAGTCA  
CATCAAGTAATTTATTTAGATTTTCAAAGCGTGCTACAAGTTATTGTAAGGTTCTCTTTGGCCCTCGTTGTTTTGGGT  
TCTTTCTTTGCGGCAGAGCTAAAGAAGAAATGGAATGGTATACTAGATGAATTTGAAAACCTTTGAGAAAAGATATTA  
AGATGTACTTCAATTAAGTTTTGATGGACTGAAGACAAAATAAAGGATATTTTCTCGACATTTCTTGTATTATTCGTGG  
GAGAAGAAACAAGTGTGCTAAAAAATGTTGAGTGCATGTCATTTGAACATAGATTTTGAATTTATGATCTCATGGAT  
CTTTCATTTATTACGGTTGAAATGGATAGAGTGCAATGCATGAGTTAATACAACAATGGGTGCTAGCATAGTTTCATAA

TGAATCATCTGAGCCTGGAAAGAGGAGTAGGCTGTGGTTGGAACACGACATTTGGGAGGTGTTTGTAAATAATTCTGGAA  
CAGATGCAGTTAAAGCCATAAAGTTGGACTTGCCTAAATCCACAAGGCTAAATGTAGATCCACGGGCATTTGGAAGCATG  
AAAAATTTGAGATTGCTTATCATTGCAATGCACGATTTTGTACAAAGATTAGGTACTTACCTAATAGCTTAAAGTGGAT  
TGAATGGCATGGATTGCTCATCGAATTTGCCGCTCTGCTTATTACCAAAAATCTTGTGGACTTGATTTGCAACATA  
GCTCATCAAAGATTTGGGAAAAGACTTAAAGTCTCTTCAAGAAATTCGAACCTTCCCTCAAACATACAAAATTTTGAA  
TGCGAATGGCTGTA

>Cucs.091470

ATGGATTCTTCCACTGTTGCAACAGAATCACCGACTTTCAAATGGACTTATGATGTGTTTTTGGAGTTTCAGAGGAGAGGA  
TACTCGCACAAATTTACCAGTCATCTTGATATGGCCTTGGCTCAAAGGGTGTCAATGTCTTCATAGACAACAAGCTCG  
AAAGGGGTGAGCAAATTTCTGAATCCCTTTCAAATCTATACAGGAAGCTTCCATTTCTATGTTATATCTCTCAAAAT  
TATGCATCTTCTTCTGGTGTCTGGATGAATTGGTGAACATAATTGAGTGAAGAAATCCAAGGGCCAGAAATGTTTTCC  
AGTTTTCTATAAGGTGGATCCGTCGATATACGAAAACAACTGGTAGCTTCGGAGAAGCACTGGCCAAACATCAGCCTA  
AGTTCCAAACAAGACCCAAATTTGGAGGGAAGCTTTAACTACTGCTGCTAACTTGTCTGGTTGGAATCTAGGAAGTAGG  
AAGGAGGCTGATCTTATTGGAGATCTTGTAAAAAAGTGTGTCTGTATTAAACCGCACTTGCACGCCCTTATATGTAGC  
TAAGTATCCGGTTGGAATTGATTCTAAACTAGAATATATGAAGCTTCGTTACATAATCTTTTTGAGAAGAGCAACAAAT  
TCCATTATCGAAAACAACATGAGTATGAGTCTGATACTGGTGTTTACATGGTGGGCTTATATGGCATTGGAGGCATTGGT  
AAGACAATTTGGCTAAAGCTTTATACAACAAAATTTGCTCAACTACAGGAAACCTTACTCTATGAGATCCTAACGGTTGATTTGAAAGTTA  
AGCTTCAAAGCAATTCATGGCCTTGGCTCAACTACAGGAAACCTTACTCTATGAGATCCTAACGGTTGATTTGAAAGTTA  
TCAACCTTGATAGAGGAATTAACATCATAAGGAATAGATTGTGTTTGAAGAAAGTCTTTATAGTTCTTGATGATGTAGAT  
AAGCTTGAGCAGTTAGAAGCATTGGTTGGCGGGCGTGATTGGTTTGGCCAAAGCAGTAGAATCATTGTGACGACAAGGAA  
CAAACATTTACTTTCTAGCCATGGCTTTGATGAAATGGAAAATATTCTAGGATTGGATGAAGACGAAGCTATTGAGCTTT  
TTAGTTGGCATGCTTTCAAGAAAATCATCCATCAAGTAATATTAGACCTTTCAAACGTTGCTACAAGTTATTGTA  
GGCATTCTTTGGCTCTGTTGTTTTGGGTTCTTTCTCTGTACCAGAGATCAAGTAGAATGGTGTAGTATATTAGATGA  
ATTTGAAAACCTTTTGAACAAAGATATCAAGATATCCCTCAATTAAGTTTTGATGGTCTGGAAGACAAAGTAAAGGATA  
TCTTTCTTGATATTTCTGTTTACTTGTGGGAGAGAAAGTTAAGTACGTTAAGAATATGTTGAGTGCATGTCATGTA  
CTAGATTTTGAATTATAGTACTCACGGATCTTTCATTTATACGATTGAAAATGACATAATGCAAATGCATGATTTAAT  
AAAACAGATGGGTATAAAATAGTTTGTGGTGAATCTCTTGAAGTTGGAAAAGAGGAGTAGGTTGTGGTTGGTACAGGATG  
TTTGGGAGGTGCTTGTAAATTAATTCAGGAACAGACGCAGTTAAAGGCATAAAGTTGGACTTTCCTAATTCACGAGGCTG  
GATGTGGATCCACAAGCTTTAGAAAAATGAAAAATTTGAGATTGCTTATTGTTCAAATGCAAGATTTTCTACAAAGAT  
TGAGTACCTACCTAGTACTAGCTTAAAGTGGATTAAGTGGCATGGATTTCTGCAACCACTTTCTCTTCTTCTTCACTATGA  
AAAATCTTGTGGACTAGATTTGCAACATAGCTTTCATCAAAACATTTGGGAAAAGACTTGGAGATTGTGAAAGGTTGAAG  
TATGTTGATCTTAGCTACTCTACTTTCTTAGAGAAAATTCCTAATTTCTCTGCAGCATCAAACCTTGAAGAGTTGTATCT  
CACCAATTGCACAAATTTAGGAATGATAGATAAGTCTGTTTTCTCTCTCGATAAGCTTACTGTCTTAAACCTTGATGGTT  
GTTCTAACCTTAAAAAGCTTCCAAGAGGCTACTTTCATGTTAAGTTCTCTTAAAAAATGAAATCTCTTACTGCAAAAA  
CTTGAGAAAATTCAGACTTATCTTACAGCATCAAACCTTACGAGCTTGCATATCTACGAATGCACAAATTTAAGAGTAAT  
TCATGAATCTGTTGGATCTTTGGATAAGCTTGAAGTTTGTACCTTAAACAATGCCTAACCTGGTAAAGCTTCCAAGCT  
ATCTCAGCTTAAAGTCTCTTCTATGTTTTATCACTTTCTGGGTTGTTGTAAGCTTGAAGCTTCCCAACAATTTGCAAAAA  
ATGAAATCTTTAAGGACCTTGGATTTGGATTTTACTGCCATAAAGGAGTTACCTTCATCAATTAGATATCTCACTGAGCT  
TTGGACATTAACCTTAATGGTTGCACAACCTCATCTCCCTTCCCAATACAATTTATTTGTTAAGGAGTCTTGAGAATC  
TTCTTCTTAGTGGCTGTTCTATATTTGGAATTTTACCCTCATGTCTCCACAAGTTTCTGTTGTTGGAATCTTGAATTA  
AGGAATTTAAGTTTCTTCAAGAAATTCAGGCTTCCCTGAGAGTATACAAAAATGGATGCCTGTGGTTGTGAATCATT  
GTCTCGAATTCAGATAACATTTGTGGATATAATATCAAAAAACAGGACCTCACAATGGGTGAGATTTCAAGAGAGTTTT  
TATTAACGGGGATGAGATTCCAGAATGGTTCAGCTATAAGACTACATCCAATTTGGTGGTGTAGCTTTCGTCACAT  
CCAGACATGGAAAAGAACTTTGGCTGCCGTGTGTTAGTTTTCAAAGTAAATGGAATTCATCTGAAAAGAGGTGCCCGATTT  
ATGCAATATATTCGTCTGCAATAGACTCTATTTTTTCTTGTCAAGACCATTTCTTCCCTCAAATCAGAATATATGTGGT  
TAGTAACAACCTTCTCTAGCGTTGGGTTCCATGGAGGTGAATGACTGGAATAAAGTTTTGGTCTGGTTTTGAGGTTTCTGAA  
GCACATAGTGAAGTTAATGCAACTATAACAAGGTATGGTGTCCATGTCCTGAAGAGCTCCATGCGATACAACCGGATGT  
CAAGTGGCCGATGGTAAATTTATGCTGATTTTTTATCAACTGGAGAAATTTGCAAAAGTCTGGATATTGAGGAACCTTCTTCTCA  
AACGCCTTTTTGAAGAAATGTCGTGCTGGTCCAATTTCCCAAGCAATGTTATATGCGGCAATTTATGATCCAGAAGCAATA  
ATCGATTGCAATATACAACCTATGATATTTCCATTGCACGTAACATATAATGGTGGAGACATTTATATGTTGGAATGGAAGG  
CATGGGAGACACTACACTCGCAACTCTTTATGCAATAAAATTTAATAGGTCAAATGACAACGGTTGGCCAAAGAGAAGCTT  
TAGATGATTTTACAAGCTTTTTGCAATTTTCGAGGAGGAAAGTTTTATGGAGGTTTCTGGTCAATTGTCCACCACCCTAAG  
CGTGGAGATGGTGAAGAGGAACCAATATCACAACCCGCACAATATCCTCAAACGCTATTGATACTCTTTCATAAAGC  
GGGAGCTATAATCATTTTAACTTTGCTGGTAGCCACCGTTTATTGATGAGGTTCTGGCAGTTATGACAGTCTTAAACG  
GAAGAGGTGATGTTGGCTTCTGATTGAAAGGGTTGATACATCTTGTCTGTA

>Cucs.091530

CAGAATCATCTACTTTCAAGGAGCTATGATGTGTTTTTGGAGTTTCAGAGGAGAGGATACTCGAGACAATTTACCAGTCA  
TCTTGACATGGCCTTGGCTCAAAGGGTGTCAACGCTTTCATTGACGACCAGCTCGAAAGGGGTGAGCAAATTTCTGAAA  
CCCTTTTCAAATCTATACACAAAACCTTCCATTTCTATTGTATATTCTCTGAAAATTTATGCATCTTCGACATGGTGTCTG  
GATGAATTTGGTGGAAATAATGAAATGTAAGAAATCCAAGGGTCAGGAAGTTTTGCCGATTTTCTACAAGGTGGATCCTTC  
GGATGTACGAAAACAACTGGTTGGTTTTGGAGGAGCATTTGGCCAAACATGAGGCTAATTTTCATGGAGAAGATTCCAATAT

GGAGGGATGCTTTAACTACTGCTGCCAACTTAGCTGGTTGGGATCTCGGAACCATAAGAAAGGAGGCTGATCTTATTCAA  
GTTATTGTTGAACGAGTGTGTCTATATTAATCAAACCCACACGCCCTTAAAGGTAGCTGAGTATCCAGTTGGAATTGA  
TTACAAAATAGAATCCCTTTACTGGACACAAGAAATGTACAAGTCTGAATGTGTTGACATGGTGGGGATATATGGCATT  
GAGGCATTGGTAAAACAACCTTTGGCTAAAGCTTTATACAACAAAATTGCTAGCCAATTTGAAGGCTGCTGCTTTCTATCA  
AATGACAATAATTCTAGTGCCTTTAGGGAGTTCGTTCTAATGAATAGTGGGATTCAGAAATGGTTGAGCTATCAGACTAC  
ATCAGATTCATAAAGGGTTAGTTTTCAACACAATCGCAATACAGAAAGAACTTTGGCTACATCTGTTACTTTTCGAGTGG  
ATGGGGATTCATATCAAGGAATGGCCTTAGTTTTCATGTAACATATTCATCGGCTGTAGACTCAAAAGTTGTATATGAGA  
AAATTTCCAACATCAACATCAGAATATACATGGTTAGTAGAACTTTTTCTGCAACATCTAGTAGCTCCTTGGAAATGAA  
TGATTGGAATGATGTTGTAATCTGTTTTGAGGCTGTGAACGTCTCGGGTCGTAACATAAGAAGCTATGGTGTCTATT  
TCACTGAAAAGGTCTCTGGGATACAAAATGATATCAAGGGACCAGGGGCAACTTATACAGATTTTGATCAACCCGGACGAA  
TTGCGCTCGAGCCGGTGA

>Cucs.091680

ATGAATCAAGCAGGTGGATCATCTTCTCCTCGTGTGTTTTAGATGGAGTTTCGATGTATTC  
TTAAGTTTTTCGAGGGGAAGATACTCGATCCAACCTTACCAGTCATCTTAATATGACTTTG  
CGTCAAAGAGGAATCAATGTCTTTATAGATAAAAAGCTTTCAAGAGGTGAAGAAAATTTGT  
GCATCTCTTTTGAAGCTATTGAAGGGTCCAAGATCTCCATCGTTGTAATTTCTGAAAGT  
TATGCATCTTTCGAGTGGTGTGTTGAATGAATGGTGAAAATCATTATGTGTAACAAGTTG  
AGAGGACAAGTTGTTTTACCAATTTTTCTACAAGGTGGATCCATCTGAAGTAGGAAAACAA  
AGTGAAGATTTGGAGAAGAATTTGCCAACTTGAAGTTAGATTCTTCAACAAGATGCAA  
GCATGGAAGGAGGCTCTCATFACTGTTTCCCATATGTCTGGATGGCCGGTCTCCAAAGA  
GACGACGAGGCTAATTTGATTCAGAACATGTTTCAAGAAGTCTGGAAGAAATTAGATCGT  
GCAACGATGCAGTTGGATGTAGCTAAATATCCAGTTGGAATTTGACATACAAGTTAGAAAT  
TTACTCCCACATGTTATGTCTAATGGAATTACCATGTTTGGATTATATGGAGTTGGAGGT  
ATGGGCAAGACAACATATAGCGAAAGCTTTTACAATAAAAATTTGCTGATGAGTTTGAAGGT  
TGTTGCTTTCTGTCAAATATTAGAGAAGCTTCGAATCAATATGGAGGCCCTGTTCAATTT  
CAAAAGGAGCTACTTTGTGAGATTCTAATGGATGATTCGATTAAAGTTAGCAATCTTCCCT  
AGAGGAATTACTATCATAAGGAATCGACTATACTCAAAAAGATTCTTTTGATTCTTGAT  
GATGTTGATACGCGTGAACAACACAGGCATTGGCGGGAGGACATGATTGGTTTGGACAT  
GGAAGTAAGGTGATTGCGACAACAAGAAACAAGCAATTACTTGTACTCATGGATTTGAT  
AAAATGCAAAAATGTTGGGGGATTGGATTACGATGAAGCTCTTGAGCTCTTAGTTGGCAT  
TGTTTTAGGAATAGTACCCCTTAAATGTTTATTTAGAAGCTTTCAAAACGTGCCGTAGAT  
TATTGTAAGGCCCTTCCCTTAGCTCTTGAAGTTTTAGGTTCCCTTCCCTCATCTATTGGT  
GATCCCTCAAATTTTAAACGTATATTGGATGAATATGAAAAACATTACCTCGATAAGGAC  
ATCCAAGACTCTCTTCGAATAAGTTACGATGGACTCGAAGATGAAGGAATAACTAAACTT  
ATGAATCTATCACTTCTTACCATTGGTAGATTCAACAGAGTTGAAATGCATAACATAATA  
CAACAAATGGTCCGACAATTCATCTTTCAGAACTTCTAAATCTCACAAAAGAAAAGA  
TTGTTGATTAAGATGATGCTATGGATGTTTAAATGGGAATAAGGAAGCAAGAGCAGTG  
AAAGTCATAAAACTAAATTTTCTTAAACCTACGAAGTTGGACATCGATTCAAGAGCTTTT  
GATAAAGTGAAAAATTTGGTAGTACTGGAAGTTGGCAATGCCACATCTTCAGAAAGTTCT  
ACTCTTGAGTATCTACCCAGTAGCTTAAGGTGGATGAATTGGCCTCAATTTCTTTTTTCA  
TCTTTGCCCTACAACCTACACAATGGAGAACCTTATTGAATTGAAATGGCCATATAGCTCC  
ATCAAACATTTTGGTCAAGGATATATGAGTTGTGAAAGGTTGAAGGAAATTAATCTTAGT  
GACTCCAATCTTTTGGTGGAAATCCCAGATTTATCTACTGCAATAAACCTCAAATCTTG  
AATCTGTAGGATGTAATAATTTAGTAAAAGTTTCAATGAATCAATTTGGATCTCTCAGTAAG  
CTTGTGCGCCCTTCATTTTTCTAGTAGTGTAAAGGGCTTTGAGCAGTTTCCATCCTGCCTC  
AAGTTGAAATCTCTTAAGTTTTTGTCAATGAAAAATTGTAGAATAGATGAATGGTGTCCC  
CAATTCAGTGAAGAAATGAAGTCTATAGAATATTTATCGATTGGGTACAGTACTGTAACA  
TATCAGCTATCTCCAACAATTTGGATATCTTACTAGCCTAAAACATTTGAGCCTCTATTAT  
TGCAAAGAGCTCACAACCTTCCAAAAATTTCAAAGGTTCCCGAAGGCGTAATTTGTATG  
AGTGTCTGGGAGCATATCATTGGCTAGATTTCCATAACAACCTGGCTGATTTCATGTCT  
TGTGATGATCTGTGGAATATTGTAAGGGTGGAGAATTGAAACAACCTGGTATTAATGAAT  
TGTCAATATCCAGATTGGTATAGGTACAAGAGCATGAGCGATTCAATTAACATTTTTTTTG  
CCAGCTGATTATCTAAGTTGAAATGGAAGCCTTTGTTTGTCTCCTTGTGTCAAATTTGAA  
GTTACGAATGATGATTGGTTCAGAAAGCTTGAATGTAAAGTTTTTATCAACGATATTCAA  
GTATGGAGTTCTGAAGAGGTGTATGCCAATCAGAAGGAACGGAGTGGGATGTTTGGAAAA  
GTATCACCCAGGTGAGTATATGTGGCTGATAGTACTTGATCCTCATACACGTTTCCAATCA  
TATTCGGATGATATCATGGACAGGAGGTCCTGAAGATTATGATCTAAATCAACTAAGT  
TCTGAGATTAATCTCTCACAAGTATTTTTGGGTAAAATTTACGGTGTCAATTTGAGGTTACT  
CCATGGTATAAAGACGTAGTTATAAAAATGTGTGGTGTTCATGTCATCATGGGGGAATGA

>Cucs.091690

ATGAATCGAGCAACTGGATCGTCTTCTCGCATCTTAGGTTGCCTTTTGATGTATTCTTA

AGTTTTAGAGGGGAAGATACTCGTTCCAACCTCACGAGTCATCTTCATATGGCTTTGTGT  
CAAAAGGGTATCAATGTTTTTCATAGATGATGACAAGCTTCCAAGGGGTGAAGAAATTTGT  
ACATCTCTTTTTGAAAGCCATCGAAGAATCGAAAATCTCGATTGTTATAATTTTCAGAAAAT  
TATGCATCTTCCCATTGGTGTTTGGATGAACTGATGAAAATCATTATGTGTAACAAATCC  
AATAATCGACAAGTCGTTTTTCCCTGTTTTTTACAAAAGTGGATCCATCTCATGTACGACGA  
CAAAAGGGGAGTATTTGGAGAAGAATTTGCCAAAACCTCCAAGTTAGGTTCTCCAACAAGATG  
CAAGCATGGAGTGAGGCTCTAACTTTTCATCTCCACTATGTCTGGATGGGATCTAAAAAAC  
TATGAAAATGAAGCAAGTTTATTGATTCAAATAATTGTTCAAGAAGTCAGAAAAGAAATTAAG  
AATAGTGCAACAACGGAGTTAGATGTAGCTAAAATATCCAGTTGGAATTGACATACAAGTT  
AGTAATTTACTGCCACATGTTATGTCTAATGAAATTAATGTTTGGATTGTATGGAATT  
GGAGGTATGGGCAAGACAACCTTTGGCCAAAGCTTTATACAATAAAAATTTCTGATGACTTT  
GAAGGTTGTTGCTTTTTGGCAAATGTTAGAGAAGCTTCAAATCAATACTGGGGTCTTGTT  
GAACTCCAAAAGACGCTAATTCGTGAGATTCTGATGGATGATTCAATCAAAGTTAGCAAT  
GTTGGTATAGGAATTAGCATCATAAGGGATCGATTATGCTCAAAAAGATAATTTTGATT  
CTTGATGACATTGATACACATGAACAACCTACAGGCATTGGCTGGAGGACATGATTGGTTT  
GGACATGGAAGTAAGGTCATTGCAACAACAAGAAAACAAGCAATTAATCTGCTAGTCATGGG  
TTAATATATTTGAAAAGAGTTAACGGATTAATGCGATTGAAGGCTTTGAGCTTTTTAGT  
TGGCATGCAATTTAAAAGTAGTCATCCCTCAAGTATTATTTAGATGTTTTCAAACGTGCT  
GTGCATTATTTGTAAGGCTTCCCTTAGCACTTGAAGTGTAGGTTCCCTTCCCTAATTCT  
ATCGATGATCAATCCAAGTTTGAACGTATATTTGGATGAATATGAGAACTCATACTGGAC  
AAAGGCATCCAAGATATTTCTCGAATAAGTTATGATGAGCTTGAACAAGATGTAAGAAGAA  
ATTTTCCCTTACATTTCTTGTGCTTTGTACATGAAGACAAAACGAGGTTCAAATGATG  
TTAAAAGAATGTGACTCTCGTTTCAGATTGGAAATGGGTATTAAAAACCTCACTGATCTA  
TCACTTCTTACAATTTGATAAATCAACCGGGTCGAAATGCATGACTTGATACAACAATG  
GGTCACACAATTCATCTCTTGGAGACTTCTAATTTCTCATAAAAAGAAAAGATTGTTGTTT  
GAAAAGACGTCATGGATGTCTTAAATGGAGATATGGAAGCAAGGGCTGTGAAAGTCATA  
AAGCTAAATTTTCATCAGCCACTGAGCTAGACATTGATTCAGAGGTTTTGAAAAGTG  
AAAACCTTGGTAGTGCTCAAAGTTCACAACGTCACATCTTCAAAGGCTCGAGTATCTA  
CCGAGTAGCTTAAGGTGGATGATTTGGCCTAAAATTTCCGTTTTTCATCTTTGCCTTCAACC  
TACTCATGGAGAAAATTAAGTGAACCTCAGCATGCCAAGTAGCTTCATCAACATTTTGGAA  
AATGGATATCTGAATTTGCAAAATGGTTGAAGCGTATAAATCTTAACACTCAAAGTTTTTA  
GAAGAAATTTCTAGATCTATCCAGTGCAGATAAATCTTGAAGAGTTGAATCTTTCCGAGTGT  
AAAAGCTGGTAAGAGTTTCAATGAAATCAGTTGGATCACTAGGTAAACTTGCATAAATGGAA  
CTTTCTAGTCATCCTAATGGCTTTACGCAATTTCCATCCAACCTCAAGTTGAAGTCCCTA  
CAAAAATTTGGTAATGTACGAGTGCAGGATTGTTGAAAGTTATCCTCATTTCAGTGAAGAA  
ATGAAGTCTAGTTTAAAAGAATTACGGATTCAAGTCTTGTAGTGTGACAAAACCTATCCCCA  
ACGATTTGAAAATCTTACTGGTCTTCAACATTTGTGGATCGATGATGCAAGAGGCTCACT  
ACTCTTCCAAAATTTTTAAAGGTTCCAGAAGCGTAATTTATATGAATGCTCAAGGGTGC  
AGATCATTGGCTAGATTTCCAGACAATATAGCTGAATTCATATCTTGTGATTCCGAATAT  
GTAGATGGAAAATACAACAACCTCATATTAATGAATAATTGTGATATTTCCAGAATGGTTT  
CATTTCAAGAGTACGAACAATCAATAACGTTTCCACGACATTTAATTTATCCGGGTTGG  
AAATTGAAAGTCTTGTGCTGTTGTGTTAAAGTTCAAGTTCATGATCCTGTTAATGGGTAT  
CATAGAGGGGGGATCTTGAATGTGAAGTGTCTTTAAGGACATTCTAGTATGGAGTTCT  
GGAGACTGGACAAATTTATCTTGATACGATTCAGATGGTTGCCCCTAGGAGCATCACC  
AGTGAGTATACATGGTTTTATTTGACTCAATCTCATAGAGATTTCTCCCTAGATGATTGG  
GATGATATGATGGAGAGATCACCAGAGACTGATCTAAGTCAGCTATGTTTTGGAATTAAT  
TCCATGGAAATGGACCGTAATAGATCAAATGATAAATGGAATTTCTATTGGGGGAAGTATT  
TGGAAGAACTTACGGTGTGTTTTGAGCCTCGTCCCCTGTCTCCAGACACTACAATAAGT  
ATAAAAGGTTGTGGTGTTCATGTATCATGGAGTAA

>Cucs.a.091710

ATGGATAGAGCAAGTGGATCATCTTCTTCCATGTTTTAGATGGACTTTTGATGTCTTTTAAAGCTTTCGAGGGGAAGA  
TACTCGATCCAACCTCACAGTCATCTTAATATGGCTTTGCGTCAAAGAGGAATCAATGTTTTTATAGATAACAGGATTT  
CAAGGGGTCAAGAAATTTCTGCATCTCTTTTCGAAGCTATGAGAATCCAAGATCTCCATCGTTATTATCTCCCAAAAT  
TATGCATCTTCCAGTTGGTGTGTTGAATGAATTTGGTGAATAATCATTATGTGTAAGGAATTGAGAGGACAAGTTGTTTTACC  
AATTTTTTACAAAAGTGAATCCATCTCAAGTACGGAAACAAAATGGAGCATTTGGAGAAGCATTGCGCAACTTGAAGTTA  
GATTTCTTGACAAGATGCAAGCATGGGGAGAGGCTTTGACTGCTGTTTTCCCATATGTCTGGATGGGTGAGACAATTTGAG  
AATCTGCTCTCATGTTTATGATTGATGGAACTAGAATGGTTGGATTGCATGGAATTGGAGGTATGGGCAAGACAACCTTT  
GGCCAAAACATTATACAATCGGATTGCTGATGACTTTGAAGGCTGTTGTTTTTTAGCAAATATTAGAGAAGCTTCAAAGC  
AACACGAGGGACTTGTTCGACTCCAAGAGAAAACCTACTTTATGAGATTTTAAATGGATGACTTTATTAGAGTTAGTGATCTT  
TACAAAGGAATCAACATCATAAGGAATCGACTATGCTCCAAAAGATTTCTTAAATCTTGATGATATAGATACCAGTGA  
ACAACACTACAGTATTAGCTGGAGGATACGATTGGTTTGGATATGGAAGTAAGGTCATTGTGACAACAAGAAACGAACACT  
TACTTGATATCCATGGATTTAATAAATTCGGAAGTGTTCCTGAATTAATGTTGTAAGCTCTTGAGCTTTTTAGCTGG



CATGCTTTTTCAGTGTAGTAGTCCACCAACCGAGTATTTACAACCTTTCAAAAAGATGCTGTAAATTATTGTAAAAATCTTCC  
CTTGGCGCTTGAAGTTTTAGGTTTCATTCCCTTTATTCAACTGATCAATCCAAATTTAAAGGTATATTGGAGGAATTTGCCAA  
TCTCCAACCTTGACAAAGACATCCAAAATCTTCTTCAAGTAAAGTTACGATGAACCTGAAGGTGATGTACAAGAAATGTTT  
TTGTTTTATTCTTGTTCCTTTGTGGGAGAAGATAAAACCATGGTTGAAACGATGTTGAAGAGTTGTGGTTGTTTATGTTG  
GGAAAAGGGAATTCAAAACTCATGAATCTATCACTTCTTACTATTAACCAATGGAACAAAGTTGAAATGCATGACTTAA  
TACAACAATTTGGGTACACAAATCGCACGTTCAAAGACTTCTATATCTCCTTCAGAAAAAAATTTATTTGGTTGGAGATGAT  
GCTATGCATGTGCTAGATGGCATTAAAGGATGCAAGAGCAGTTAAAGCCATAAAGTTAGAAATTTCCCTAAACCGACAAAGTT  
GGACATTATTGATTCAACGGCTTTTAGAAAAGTAAAGAACCTTGTAGTACTCAAAGTGAAGAATGTCATACTCCAAAAA  
TTAGTACTCTTGATTTTTCTACCTAATAGCTTAAAGGTGGATGAGTTGGTCTGAATTTCCCTTTTTCATCATTTCCCTTCAAGC  
TACTCAATGGAGAACCTTATTCAACTCAAATTTGCCACATAGCGCCATCCAACATTTTGGAAAGAGCATTATGCATTGTGA  
AAGTTGAAGCAACTTGATCTTAGCAACTCTTCTTTTTGGAGGAAATTCCTGATTTATCTGCGGCAATAAACCTCGAAA  
ATTTGTCTCTTCTGGATGTATAAGTTTTAGTAAAGTTTCAAAATCAGTTGGATCTCTTCTTAACTTATTTGATTTGAGT  
CTTTCAAGCCATGTTTATGGCTTTAAGCAGTTTCTTCCACTCAGGTTGAAATCCCTTAAAGATTTTCAACTGATCA  
TTGTACAATACTTCAAGGCTATCCTCAATTCAGCCAAGAAATGAAGTCTAGTCTAGAAGATTTGTGGTTTCAAAGTAGTT  
CTATAACAAAGCTATCTTCAACAATTAGATATCTTACCAGCTCAAAGATTTGACCATCGTGGATTGCAAAAAGCTCACT  
ACTCTTCCAAGTACAATTTATGACTTGAGCAAACCTTACATCCATAGAAGTCTCACAAATCCGATCTTTCAACATTTCCCTC  
CTCATATTTCTGCCCTTCTCACTTCCCTCCTAACAAGATTACACCTTTATGAGAACAAGATAACAATTTAGATTTTT  
TGGAAACTATCGCTGCTCCATCAGAGAGTTGAACTGTCTAACAACTTTCTATACTACCTTCATGT  
ATTTGTTAATTTTAAATCCTTGAGATTTCTTGAAACATTTGATTTGTAAGTTTCTGGAAGAAATTCAAAGATTCAGAAG  
CTTAATTTCTTTGGGTGCATATCATTGGCCAAATCTCCCGACAACCTTAG

>Cucs.091780

ATGGGTTCTTCCACTGCTGCAACAGAATCCATGGCTTTTGAATGGAGTTATGATGTTTTT  
TTGAGTTTCAGAGGAGGATACCTCGTACCAATTTACCAGTCACTTGATATGGCCTTG  
CGTCAAAAGGGGTCAACGCTTTCATAGACGACAAGCTCGAAAAGGGGTGAGCAAAATTTCT  
GAATCCCTTTTCAAATCTATACAGGAAGCTTCCATTTCTATTGTTATATTCTCTCAAAAT  
TATGCATCTTCTTCTGGTGTCTGGATGAATTTGGTGAACATAATTGAGTGAAGAAATCC  
AAGGGCCAGAAATGTTTTCCAGTTTTCTATAAGGTGGATCCGTGCGATATACGAAAACAA  
ACTGGTAGCTTCGGAGAAGCAATGGCCAAACATCAGCCTAAGTTCCAAACAAAGACCCAA  
ATTTGGAGGAAAGCTTAACTACTGCTGCTAACTTGTCTGGTTGGGATCTAGGAGCTTAT  
AGGAGGGAGGCTGATCTTATTCGGGATCTTGTAAAGGAAGTGTATCTACAATAAATCGC  
ACTCGCACACCCTTATATGTCGCCAAGTATCCAGTTGGAATTTGATTCTCAACTAGAATAC  
ATGAAGTTTCACTCACATCATCTCAACAAGGAAACAAATTTCCAATATTGGACACAAAAT  
GAGTATGAGTCTGATATTGGTGTTTACATGGTGGGATATATGGCATTTGGAGGCCTTGGT  
AAGACAACTTTGGCTAAAGCTCTATACAATAAAATAGCTAGCCAATTTGAAGGGTGTCTGT  
TTTCTATCAAATGTTTCGACAAGCTTCAAACCAATTTCAATGGCCTTGTTCAACTACAGCAA  
AACCTACTCTATGAAATCTTAGAGGATGATTTGAAGTTTGTCAATCTTGATAAAGGAAT  
ACCATATAAGGAATAGACTCGCTTCAAAGAAAGTTTTGATAGTTCTTGATGATGTGGAT  
AAGCTCGAACCAACTAGAAGCATTGGTTGGTGGACGTGATTTGGTTTGGTCAAGGTAGTAAA  
ATCATAGTGACGACGAGGAATAGTCATTTACTTTCTAGCCATGGATTTGATGAAATGCAC  
AATATTCAAGGATTGAATCAAGACAGAGCTATTGAGCTTTTGTAGTTGGCATGCTTTTAAAG  
GAAAGTCATCCATCAAGTAATTTATTTAGACCTTGGCCAAAGCTGCTACAAGTTATTGTA  
GGTCATCCTTTGGCTCTTGTGTTCTGGGTTCTTTCTTTGTAATAGAGGTCAAACAGAA  
TGGAGAAGGGAAAAATACAATAATTGTGCTAAAAAATGTTGAGTGCATGCCATTTGAAC  
GTAGATTTTTGGAATTTATGATACTCATGGATCTTTCACTTGTACGATTTGAAAAGGATAGA  
GTGCAAAATGCACGGATTAATACAACAGATGGGTTCATAGCATAAGTTTCAATGAATCATTT  
GAGTCAGGAAAGAGGAGTAGATTGTGGTTCGGAGCGGGACATTTGGAACGTGTTTGTAAAT  
AATTCGGGAACAGATGCAATTAAGCCATAAAGTTAGACTTGCCATAATCCATAAACGTA  
AATGTAGATCCAAAAGCATTTCTTTAGAAGCATGAAAAATTTGAGATTGCTTATCATTCGA  
AATGCACAAGTTTGTACAAGATTAAGTACCTACCTAATAGCTTAAAGTGGATTGAGTGG  
CAAGGATTTGCTCATCGAATTTCCCGTCTGCTTCAATACCAAAAATCTGTTGGACTT  
GATTTGCGACATAGCTTCAAAAAGATTTGGGAAGAGACTTGAGGATTTGTAAGGTTG  
AAGCATGTTGATCTTAGCTACTCTACTTTATTTAGAGAAAAATCCTGATTTATCCGCTGCA  
TCAAACCTTGAAGAATTGTATCTCATCAATTCACAAAATTTAGGAATGATAGATAAGTCT  
GTTTTCTCTCAATAAGCTTACTGTCTTAACTTTAAAGGTTGTTCTAACCTTAAAAAG  
CTTCAAAGGCTACTTCAATGTTTCAAGTTCTTAAAATATTGAATCTCTTACTGCCAA  
GAACTTGAGAAAATTCAGACTTATCTTCAAGCATCAAACCTTCAAGGCTTGGTACTCAAC  
GGATGCACAAAATTTAAGAGTGAATCATGAATCTGTTGGATCTTTGAAATGAGCTTGTATTG  
TTGGACCTTGGACAATGCACCTAACCTTTCAAAGCTTCCGAGCTATCTCAGGTTAAAGTCT  
CTTGTCTATTTAGTACTTTTTGGGTGTGGTAAAGCTTGAAGCTTTCCAACAATTGCTGAA  
AACATGAAATCTTTAAGGTGCTTGGATTTGCATTCCACCGCCATAAAGGAGTTACCTTCA  
TCACTTGGATATCTTACTCAACTCGATAAATTAACCTTACCGGTTGCACAAAACCTCATC  
TCCCTTCCCAATACAATCTATTTGTTAAGGAATCTTAACGAACCTTATCTTGGTGGGTGT

TCTAGATTTGAAATGTTTCCCATAAATGGGTCCCAACCATCCAACCAGTATGCTCTCCT  
TCAAAAATGATGGAAGCAGCTTCGTGGAGCTTAGAGTTTCCCATTAGTAGTACCAAAT  
GAAAGCATATGTTCCCATTTCACTTTGTTGGATCTTAAATCTTGCAACATATCAAATGCA  
AAATTTTGGAAATTTTATGTGATGTTGCCCTTTCTTATCTGATCTACGTTTGTCCGAA  
AACAAATTCCTAGTTTACCCTCATGTCTCCACAAGTTCAATGTTCTTATCGAATCTTGAA  
TTAAGGAATTGTAAGTTTCTTCAAGAAATCCCAAACCTTCCCCAAAACATACGAAACTTG  
GATGCCAGTGGTTGCAAATCGTTGGCTCGAAGTCCAGATAACATTGTGGATATAATATCA  
ATAAACAGGACCTTGAATTGGGTGAGATTTAAGAGAGTCTTATTAACGGACATTGAG  
ATTCCAGAATGGTTTCAGCTATAAGACTGCATCCAATTTGGTGACTGCTAGCCTTCGTAC  
TATCCAGACATGGAAGAACCTTTGGCTGTGCTGTTAGTTTAAAGTGAATGGAGATTCA  
TCTGAAAGTGAGGCCAAATTTTCATGCAATATATTCATCTACAATAAACTCCGTTGTTG  
TTTTCAAGATCAATTTCTCCATCAAATCAGAATATATGTGGTTAGTAACAATTTCTCTA  
GCGTGTTCCTGGAGGTGAATGATTGGAATAAAGTTTTCTGCTGGTTTGAGGTTTCATGAA  
GCACATGGTGAACGTGAACAAGGTATGGGTCATGTCACTGAACAACCTCCATGGGATA  
CAAACGGATGCAAGTGGCCGATGGTTAATTATGCTGATTTTTATCAACTGGAGAAATTG  
CGAAGGGATCTGGATTTGAGGATCTCAAAGCTAGTTTAAAGAAGTCTGCTGTTCAAAT  
CCAAAGCAACATTGCATGCACTTTAGTATGATCCAGAGGCAATAA

>Cucs.091820

ATGGGTTCTTCCATTGTTGGAGCTGAATCATCAACTTCTTCTTCTTAGTTTCAAGTGGAGTTTGTATGTGTTTTGAG  
TTTTAGGGGAGATGATACTCGTTCTAATTTACCGGTCATCTTGACATGGCCTTGCGTCAAAGGGTGTCAATGTCTTCA  
TAGACGACATGCTCAAAGGGGTGAGCAAATTTCTGAAACCTTTCCAAAGCTATACAGGAAGCTTTGATTTCTATTGTT  
ATTTTCTCTCAAATTTATGCATCTTCTTCATGGTGTCTGGATGAATGGTGAAAATAGTTGAGTGAAGAAATCCAAGGG  
CCAGCTTGTGTTTGCCTAATTTCTACAAGGTGGATCCTCCGATGTACGAAAAACAACTGGTTGCTTTGGAGAAGCATTTGG  
CCAAACATCAGGCTAATTTTCATGGAGAAGACTCAAATATGGAGGGATGCTTTAACTACTGTTGCCAACTTCTCTGGTTGG  
GATCTAGGAAGTAGGAAGGAGGCTGATTTTATTCAAGACCTTGTAAAGAAGTATTGCTAGATTAAATTTGTCGAACGG  
GCAGTTATATGTAGCTAAGTATCCAGTTGGAATTGATTCTCAACTAGAAGATATGAAGTTACTCTCGCATCAGATACGAG  
ATGCGTTTTGATGGCGTTTACATGATGGGGATATACGGCATTGGAGGCATTGGTAAGACTACTTTGGCTAAAGCTTTGTAC  
AATAAATTTGCTAACCAATTTGAAGGTTTTGCTTTCTATCAAATGTTAGAGAACTTCAAACAGTTCAATGGACTCGT  
TCAACTACAGGAAAACTACTCTATGAAATCTTAAAGTTTGATTTGAAGATTGGCAATCTTGATGAAGGAATTAACATCA  
TAAGAAGTAGATTGCGTTCAAAGAAAGTTCTATAGTTCTTGATGATGTGGATAAGCTCAAGCAATTTGGAAGCATTTGGT  
GGTGAACGTGATTGGTTTTGCCCATGGTAGTAAAATCATTGTGACAACAAGAAATAGTCATTTACTTTCTAGCCATGAATT  
TGATGAAAAGTATGGTGTTCGGGAATTGAGTTCATGGTCACTCCCTTGAACCTTTTATGTTGGCATGCTTTTAAAGAAAGTC  
ATCCATCAAGTAATTACTTAGACCTTTCAAACGTCGACAAAATTTATGTAAGGTTCATCCTTTGGCCCTTGTGTTTTG  
GGTCTTTCTTTGTACCCGAGACCAAATAAATGGAGAATATATTAGATGAATTTGAGAATCTTTGAGTGAAGACAT  
TGAACATATTATTCAAATCAGTTTTGATGGGCTTGAAGAAAAATAAAGGAGATCTTCTTGATATTTCTGTTTTGTTTTG  
TGGGAGAGAAAAGATTGTAAGGTTGAAGCATGTTGATCTTAGTTACTTCTTTATTAGAGAAGATTTCCGACTTCCCT  
GCAACATCAAATCTTGAAGAAATTTATATCTTAACAATGCACAAATTTAAGAACAATTTCAAGTCAAGTTGTTCTCTGG  
TAAGCTTTACTTTAGACCTTTGATCATTGTTCAAACCTTATAAAGCTTCCAAGCTTACCTCATGCTGAAGTCTCTTAAAG  
TTTTGAAGCTTGTACTGCAAAAACTTGAGAACTTCCAGACTTCTCTACAGCTTCAAACCTTGAAAAGTTGTACCTC  
AAAGAATGCACAAATTTAAGAATGATTTCATGATTCTATTGGATCTCTGAGTAAGCTTGTACCTTGGACCTTGGAAAATG  
CTCTAACCTTGAAGGCTTCCAAGCTACCTCACATTAAGTCTCTTGAATATTTGAATCTTGCTCATTGCAAAAAGCTTG  
AGGAAATTTCCGACTTCTCTTCTGCAATTAACCTTAAAGCTTATATCTTGAACAATGCACAAATTTAAGAGTAATTCAT  
GAGTCTATTGGATCTTTGAATAGTCTTGTACCTTGGACCTTAGACAATGCACTAACCTTGAAGGCTTCCAAGCTACCT  
CAAGTTGAAGTCTCTTAGACATTTTCAACTCTCTGGCTGCCACAAGCTGAAATGTTTTCAAATAATTTGTAAGAAACATGA  
AATCTTTAATTTCAATGCAATTTGGATTCTACTGCCATAAGGGAGCTACCTTCATCAATTTGGATACCTTACTGCGCTTTTG  
GTATTAACCTTACGGTTGCACAAATCTCATCTCCCTTCTAGTACAATTTATTTGTTAAAGAGCCTTAAAGCATCTTTA  
TCTTGGTGGGTGTTCTAGATTTCAATTTTCCCATTTTGGAAATTTTATGTAATGTGCCCCCTTTCTTATCTAGTA  
TACTTTTGTGCGAAAACAAATTTCTTAGTCTACCACCATGCTTTCATAAGTTTATGTCCTTGTGGAATCTCCAATTAAGG  
AATTGCAAGTCTTCAAGAAATTTCTAACCTCCCTCATTGTATACAAAAATGGATGCCACTGGTTGCACATTTGTTGGG  
TAGAAGTCCAGACAACATCGACATAATATCGAGCAAGCAGGTTCCCTCACTTCCATTTCCATTTCCCTTTGGTTGGG  
ATTCATATCAAGGAATGGCCTTAGTTTCATGTAATAATTTCAATTTGGCTACAGACTCCAAAGTTGTTTTATGAGAAAATTT  
CCATCATCAACATCAGAATATACATGGTTAGTAACAACCTTCTTCCAACATTTAGCACTTCCCTGGAGATGAATGAGTG  
GAATCATGTACAGTCTGGTTTGGAGTTGTGAAATGTTCTGAGGCCACCGTAACATAAAAATGCTGTGGTGTCCATCTCA  
CTGAAGAGGTCATGGAATACAAAATGATGTCAAGGGGCCAGGGGTAGTTTATACAGTTTTCGATCAACTGGACAAATTA  
CCGAGCCGGATACGTGGTATGGAAGGCATGGCAGAGACAACACTTGCCAACCTTATATGTAACAAATATGAAAGAAGTCCG  
GAATCTTTTCTCTGCAAAAAAGCTTTGAATCATTCTACTGGCTTTCTTTGTGGAGATGGAAATGGGCTTTCTTGGGAAA  
TGGTAGACAGACCATATTAAAGTATAGATTGTCTTCCCAAAAATATCTTGAATTTTTCAGACTCGTGAATCGATATGGA  
GACCTAAATGATGTGGCTCATGGGACTGGTAATAGGTTTTCGTTCAAGATTTTAAAGGATGGATGATATAAAGAAAGATGA  
TATCAGAGAAGAGCCTTATTGGAAGTACATGGAAAAG

>Cucs.091840

ATGGGTTCTAACGCTGTGGAGCGGAATCGTCTTCTTCTTCCAAATCAATTTGGATTTATGATGTGTTTTTGGATTTTAG

AGGAGAGGATACTCGCTCCAATTTCAACAAGTCATCTTCACATGTTCTTGCCTCACAAAGGGTGTCAATGTTTTCATAGATG  
ACAGGATCGAAAGGGGTGAGCAAATTTCTGAAGCCCTTTTAAAACTATACAGTGTTCTTTGATTTCTATGTTATATTC  
TCGGAAAATTTATGCATCTTCTACATGGTGTCTGGATGAATTTGGTGGAAATAATGAGTGTAAAGAAATCCAAGGGTCAGAA  
AGTATTGCCAATTTTCTACAAGGTGGATCCTTCGGATGTACGAAAACAAAATGGTTGCTATGGAGAAGGATTGGCCAAAC  
ATGAGGCTAAATTTTCATGGAGAAGATTCCAATATGGAGGAATGCTCTAACGACTGTGCCAACTTGGCTGGTTGGGATCTC  
GGAACAATAAGAAATGAGGCTGACCTTATTCAAGTTATTGTTAAAGAAGTGTGCTCTACATTAATGTACCACGCCCTC  
AGATAAGCCTCTACTAGTTGGAATTTGATTCAAAATTTGAATCCCTTTATTGGCCTACAGAAGAAATGTACAAGTCTGAAT  
GTGTTGACATGTTGGGGATATATGGCATTGAGGCATTGGTAAAACAACCTTTGGCTAAAGCTTTATACTACAAAATGGCT  
AGCCAATTTGAATGTTGCTGCTTTCTATCAAATGTTAGAGAAGCTTCAAAGCAACTCAATGGCCTCGCTCAACTACAGAA  
AAAACACTTTTTTCAGATCTTAAAGTATGATTTGGAGGATGTCGATGATCTTGACAGGAGAAATAATATCATAAAGCATA  
GACTCCATTGGAAGAATTTCTTATACTTTGATGATGATGAGGTGCAATGATGATGATGAGCAATTAAGCAATTAAGCATTGGCTGGTGGCCAT  
GATTGGTTTTGCTCAGGGTAGTAAAATCATTGTGACGACTAGAGATAAACATTTACTTGTAGCCATGGATTTGGTCAAAC  
ATATGAAGTTGAAGGATTGTGGGAACACAATGCATTTGAGCTTTTTTGTGGCATGCCTTCAAAAAAGTCATCCATCTA  
GTAATTTATTAGACCTTTCAGAACGTGCTACAAGGCATTGTAAGGTCATCCTTTGGCTCTGTTGTTTTGGCTTCTTTC  
CTTTGTGGCAGAGATCAAGCAGAATGGAGTGGTCTATTAGATGGATTTGAAAACCTTTTGGAAAAGGTATTAAGATGT  
TCTTCAATTAAGTTTTGATGGGCTGGAAGACGAAGTAAAGAAATTTTTTCTTGATATTTCTTGTTTACTCGTGGGTGAGA  
CAGTTACCTATGTTAAGAAAATGTTGAGTGAATTCATTCGATCTGGATTTCAAATTAGCAATCTGAGGCATCTTTTCA  
CTTATTAGGATGGAAGAATATGATGATGATAGGGTGCAATGATGATTTAATAAAAACAAATGGGTCATAAAAATGTTA  
TGATGAATGTTGGTGTAGCCTGGAAAAAGGAGTAGATCAGGGAAGCGATGCAGTGAAAGGCATAAAGTTGGTGTATATC  
TGATCCCACCAAGGGTCATAAACGTGAATCCAGAGGCATTTAGAAGCATGAAGAATTTGAGAATACTGATTGTTGATGGA  
AATGTGAGGTTTTGCAAAAAAAAAGTATGTACCGAATGGGTTAAAGTGGATAAAAATGGCATAGATTTCTCATCAAAC  
TTTACCCTCATGCTTTATTACAAAAGATCTGCTTCCAAGTACCTCAAGTTAAAGTCTCTTACAGATTTAGATCTCTCTG  
GTTGTGCTAAGCTCGAAACGTTTCCAGAAATTTGATGAAAACATGAAATCCTTAGAAAAGGTTGAGGTTGTCTTATACGGCC  
ATAAGGAAGCTACCTTCAGTCTTTGCGGGCTTAGTCTTTCTGAGTGTCTATTGAAATGCGTTCCAAAATTTTTCCATTC  
ACGAGTTCCAAAAGAAATCTTATTTTTTCCAAACATTTGGAGTTGCTGGATCTTAAAGGTTGCAATATATCAAATGTTGATT  
TTCTGGAAAATTTATGTAATGTAGCTCTATCCTTAACTAGTATAGTCTTGTGCAAAAACGAATTTCTGTAGTCTACCTTCA  
TGTCTCCATAAGTTTTATGCTCTTGCAGAACTCCAATTAAGGAATTCATGTTCTTCAAGAAATTTCCAAACCTCCCTCA  
GAGTATACAAATAGTAGATGCCACTGGTTGCATATCGTTGAGAAGAAGTCCAAACATTATGTGGACATAA

>Cucs.091880

ATGGAAAGTATTCCTATTTCAATAATTTGCAAAAATTTGTGAATACACTGTTAAACCTGTTGGACGTCAACTTTGTTATGT  
ATGTTTTCAATTCATTCCAACCTTCAAAAACCTCAAGAGTCAAGTAGAAAAGCTGACAGATACAAAAGGATCTGTGGAAGACA  
AGGTTTTTATTGCAAGAAGAAATGCAGAAGACATAAAACCTGCAGTTGAGAAATGGTTGGAAAAGGTTGATCGCCTTGT  
AGAAAATCTGAGAAGATACTAGCCCATGAAGGTAGGCATGGTAGATTGTGTCCACCAATTTGGTCCAAAGACACAAGGC  
AAGTAGAAAAGCAAGCAAAAATGGCAGATGAGGTTCTTGAGATGAAAAATCAGGGAGAAAAGTTTTGATATGGTATCCTTTA  
AAGGTGCTATCTCATTGGTTGAGAGTCCACTGCCAAAAGCACCTGACTTTCTTGTACTTTGGCTCTAGAAAAGTCAACAGTG  
GAACAATCATGGATGCACTCTCTGATGATAATGTCCATAAGATTGGAGTGTACGGGATGGGGGTTGGCAAAAACAAAT  
GCTAGTGAAGAATAATGTAAGAAAATTTGAGGAGTAGAAGAAGTCTTTTGTAAAGTGGTAACATCCAGATTAGCCAAA  
CACCAGATTTTAAAAGGATTTCAAGGACAACCTAGCTGACAAAGTATAGGTTTTAAAATTCGAACAAGAAACAATAGAAGGAAGG  
GCTACTTTTCTACGAAGGTGGTTGAAGGCGGAGAGAAGAAATCCAAGTGTGAAGATCATAAAGGAATATGCAAGATCTT  
GTTTACCTCTAGGAATAAACAATTTGATCTCAAATGATATGGCGCCAATAAAAATTTTTGAGATAAAAAGTTTTAGGAGAAG  
ATGAGTCTCGAATTTATTTAAGGCAATGGCGGGTGAATTTGTTGAAGCAACTGATTTGAAGCCTATAGCCATTCAAAT  
ATGAGAGAATGTGCAGGTTTGCCTATTGCTATTACTACTGTTGCTAAGGCATTAATAAACCCTTCCGACATTTGGAA  
TGATGCTCTAGATCAACTTAAAAGTGTGATGTGGTATGGCAACATTTGGAGAAATGGACAAGAAAGTGTATTTGTCAC  
TAAAACGTAGTTACGATTTCTGGGATATGAAGAGGTGAAGTACTATTCTTGTATGTAGCATGTTTCCGAAAGATTTT  
AACATTTGATGTGGAAGGTTGCACGTATATGCTATGAGCATGGGTTTTCTTACGTGGTGTGATACTGTGGTAAAAGGACG  
ACGAAGGATTA AAAAATTTGGTTGACGATCTTATATCTTCTTCTTCTTCTTCAACAATATTTCTGAGTATGGGAACAATTTATG  
TGAAAATACATGATATGGTTCGTGATGTAGCCATACTAATAGCATCTCAGAATGATCACATACGTACATTGAGCTATGTG  
AAAAGATCGAATGAAGAATGAAAAGAAGAGAAATTTGTCGGGTAACCATACTGTAGTGTCTTAATTTATCAAGAATTTGGA  
TTCACCTGATTTCTCAAAGTTAATGCTACCTAAAGTTCAATTTGTTCTGTTATTTGGACCATCACCATCTATATATAATA  
GACATGTTGTGTCAGTGGTAGAAAACCTTTCTATAAAGAAAATGAAGGAGCTCGAAGGTTGGTAATAGAAAAGGTTGAAAATA  
TCCTTATCGCCACAAGCTCTTTACTCATTGCAAAACCTTAGATTATTAAGATTACATGACTGTGAATTTAGGGAGCATAGA  
TATGATTTGGTGAATTA AAAAAGCTTGAATTTCTTGATTTTGTAAATCTAACATCGTTGAAAATTCCTATGACCTTTAGCA  
AATTGACGCAGTTAAAAGTGTAAATTTATCTTTTTGTGATGAGCTTGAGGTAATTTCCACCAATATTTCTTCAAATTTG  
ACAAAACCTGGAAGAATTACATCTAGAAAACCTTTCGATAGTTGGGAAGGGGAGAATGGTACGAAGGAAGGAAAATGCTAG  
TCTTTCTGAGCTAAGGTAATTTGCCACACCTTTATGCTTTAAATTTAACCATTCAAGATGATGAGATTATGCCAAAACACT  
TGTTTTTAGCTGGGGATTTGAATCTTGA AAAATTTTCCACTACTATTGGTTGTGTCAGAGACAAAAGACATATTGATAAT  
AAGACCAATTTCTTTAGAAATCAAGATGGAAATCAGAAAAGGTGCTGGATGATTGGATAAAAACCTTTGTTAAAGAGGTCAGA  
AGAAGTCCATTTGAAAGGATCAATTTGTTCAAAGGTTCTCCAGATGCAAAATGAATTTCTTACATTTGAAAGAATCTCTTT  
TTAGCAAGTTGAAAAGTGTAGTGTACGAAGTGAATAAATTAGAAAAGCTTTTTTCAACTGCATATTGGATGACATT  
CTGAGTCTTGAGGAGATTGCTATTCTATTATGTGAGAAGATGGAAGTGTGATTGTGATGAAAACGAGGAGGCAACCAA  
CCACATTTGAGTTTACTCATTAAAGTATTTATTTCTAACCTATGTACCACAACCTTCAAAAATTTTGGCTCCAAAATTTGAGA  
AATTTGGACAATTAAGTCAGGATAACTCAATCAGCAATACCGTTGACATTTGGTATATTTGAAGTGAAGAGTCAAGTATT



ATTTTTAGACGTCCTCTTAAAAAGCTACATGTTTATGGATGTCATGAAGTGACAGGATTG  
CCAAAAGATCTACAACCTTTCGACTTCCATTGAGGATCTAAAGATTGTTGGGTGCCGTA  
ATGACACTAAATGTGCAAAATATGGATAGCTTGTCTCGTTTCTCTATGAATGGGTTGCAG  
AAGTTTCCCAAGGGCTGGCTAATCTAAAAACTTGAAAGAAATGACAATCATTGAATGC  
TCACAAGATTGTGACTTTAGTCCCTCATGCAACTTTCCTTCACTTGTAAGCTTCATTTG  
GTTATTTTCCCAGGGAGCGTGACTGAGCAACTTCTCAACAACCTTGAGCATCTCATTGCC  
TTAAGATCTTTGTACATTAATGATTTTGTGGAATTGAGGTTTTACCAGAATGGTTGGGA  
AACCTTACCTCTTTGGAAGTTTTGGGACTTTATTATTGTATAAATTTGAAACAGTTTCCT  
TCAAAGAAAGCCATGCAATGTCTCACCCAATTAGTCCACGTGGATGTCCACAACCTGCCCG  
AGTTTCGCAGATTTTGTCCCATGATCTAAAGGCCAAAGCTCATGCCAAAGCAAACCTTAGT  
CAATGGTAA

>Cucs.094580

ATGGCTATCGTGAGTTCCTATGGACTTATGCTGTCCAACAAGTGTGGAAGAGGTATTGAACTTGC  
TGAAAAAAACTACACCATAGTTCTGTGAGACTGTGGGTGGCAGATCTTCTACTTGTGTTCATGA  
TGGATGAGCTTGTTTATGAATATCTTCGTACAAAGGTGGAAAAAGGATCGATTAACAAGGTATG  
CTTTCTAATATTTTCATTATCTTTTCGCTTCAAAATGGCCAAAGAAATCAAGAGTATTATTGAA  
CTACGAGGCGACTCCTTTAGACTTGTGGTGAAGAATTCATAGAAACAGAGAATGATCTTAGTCAG  
TCTCAAACTTGTATGATTTTGAAGTTGTTGGAAGGGAGTTTGAAGTTTCAAGCATAGTGAACA  
AATCAATATGTTACATCTATCTTACCCATTATGGGTATGGGTGGAATCGGAAAAACAACCTTGG  
TCATGAGGAGATCAAAAGACATTTTGGATGAAACAATATGGATATGTGTGTCCGAACCATTCTT  
GAGCAATTTTACAAATGATAAAGGGTGTTCCTAGTGGCTTGGATAATAAAGAGGTTCTACTTCA  
ATGCGAGGTAAGATATTTTCTTGTGCTTGATGATGTTTGGAAATGAAAATATTGCTTTATGGACT  
TTTACTGTGTTTACTGAAAACTGGAAACGGTATCATTGTAACACGAGAAGTATGAAGTTGGAAGA  
GTACTCTTCCTAGCCATCATTTGGGAAAAATTTTGGATGAACAATGTCCGGTCTTTGTTTAAAG  
GAATTGCCAATGGATCCAGAGTTGAAGGATCTTCAAGAAGAAATGGTGACAAGGTTTGGTGGTGT  
ACTTGGAAAGCTCAATGAAACACCTTCCATATAAATTTGAGCAAGTTGGTTAGTTAAGACATTT  
AAACGCCTCCACATTTGAGCCGGTTGACTCAACTACAACGTTGTCTGGTTTTGCAGTTGGATTT  
ATAGAAGAACTTGGATTTTTGAAAACTTCAAAGGTAGATTAGAACCTTCAAATCTCAATGGAAT  
AGCCATGAGTTCCAAATGGTAGAAAAGAACTTATGTGAGCTATCTTGGAAATGGGATTTGCAT  
GCAACTCAATGACTTGGAAAGTTTAAAAGGGCTTCAACCACAAAAATCTTCAATCTTGAGTATCA  
GGCCAAATTTTGCCTCCTGCAATTTTGGTGAATAATTTAGTTGTGTGATACATCTAAGACATTT  
TCCAATGCTTGGAGAATTACCTAATTTGGAGGAACTAAATATTTCCAACCTACATTGTCTAAG  
TCTACGGAAGTTATGATCATCCAACAACCATAAGGTTTTATTTGCAAGTTGAAGAAATTTGACT  
AATCTAGAGCAATGGGAAGAAATAGTATTCACATCAAGGAAAGATGCAATTTTTCCTCTCTTGA  
TGATTGTCTATATTAACAAATGGCCAAAGATCGATCTACAACCTTGCACCTTCCATTGAGGATCT  
GCCTTGAATGATACATAAATGTGCAAAATATGCATACCTTGTCTCGTTTTCTATGAATGGGTTG  
GGACTATCTCATCTCAAAAACCTTGAAGAATGATAAATCACTGAATGCTCACAAGATTGTGACTTT  
ACTTTTCTCACTCGTAAATCTTGATTTGGTTCTTTTTCGCGGGAACGGGGCCGTGCAACTTCTC  
TCACAGCCTTAAAGATCTTTGATCATTAAATGATTTTGTGGAATTTGAAGTTTACCAGAATGG  
TTGGAAGTTTTGGGACTTTATTATTGTAGAAGTCTGAAACAGTTTCCTTCAAAGAAAGCCATTG  
TAGTCCATGTGGATGTCTTTGGTTGTCCACAACCTACCCAAGTTTCGGAGATTTTGTGCCATGAT

>Cucs.094650

ATGGCTGAATTCCTTTGGACATTTGCTGTGGAAGAGACGTTGAAGAGAACGGTGAACGTTGCAG  
CGTTTGGGGTTTGAAGATGAACCTTCAAAATTTAAGCAATGGCTACTCGATGCTGGAGCCCTTTT  
GGGAAATACCTCGCAAGGAATCGGTGAAGAGATGGGCAGATGGGCTTGAAGATATCGTTAGTGA  
GACGAGCTTGCTTATGAAGATCTTCAAGAAAAGTGGAAACAAGTTCAAGGGTGTGTAATAATTT  
TCTTAACCCCTTGTTCGTCATGATATGGCTGTAAAATGAAGAAAATTAATAAAATGTTAAAA  
CTGCTCCTTTAGGGCTTGTGGGAAGGAATCCATGGAGAAAGAAGATGGAGGTAATAATCTTAGG  
ACTTCGATTTGAATTTTGTGTTGTTGGGAAGGAACTGAAGTTTTAGACATATTGAGATTGGTGA  
TAATGAGTATGAGCTTCCCTTGTGATTGTACCGATTGTAGGGATGGGTGGAGTTGGAAAAACA  
TTTTTTCGTCATGAGTTGATCAAGAAACATTTTTCATGAAACAATATGGATATGTGTGTGCGG  
ATTTTGGTAGCAATTTTGGAAAGTTTGGACGATAAAGTTCCAACCAAAAGGGAAGCTGTACTTGC  
GTTGCTAGACAAAAGATGTTTCCCTTGTTTGGATGATGTTTGGAAATGAAAGTTCTAAGTTGT  
GTTTAAAAGAGATAGTTGGGAAATTTGGAATCACCATTTATAGTAACTACAAGGTTGGATGAAG  
ACAGTTTCCGGTTATCGTTTGGAAAAGTTACCTGAAGACCATTGTTGGTCCCTATTTAAGAGA  
AGTAAAAATGACTCCAAAGTTGGAGGCTATTCGAATAAAGTTGCTTCAAAAATTTGATGGCATAC  
TTTTGGGAGGAGCCGTGGAATTTGAAGGAGATCTTGTAGGTTGGGAGACCACACTTGAAGCAT  
ATGAAACAAAAAGTTATGTGTTGTCCATATTACAATTAAGTGTGGACCGTCTACCCTTTGTGG  
CTATTGTTCAATTTTCCCTAAAGATTGTGAAGTTGTTAAAGAAAATTTGATTAGAATGTGGAT  
AACCAACAGAGGAGAGAACACGATGGAGGATCTGGGAGAGGGCCTTCAACTTCCCTTATCTCG  
GATGTGCTCAAGGATAAGTATGGGAGAATTACTCACTTAAAGATGCATGATCTAATACATGATG

GTCAACTCGTCAAAGTCGGTATTAGATCCTACTCATTGGAATGGAAAAACGTCAAGAAAGTTGCGCACCTTACTTTACA  
ATAACCAAGAGATCCACCATAAAGTTGCAGACTGTGTTTTCTTGCCTGTTTTAGAAAGTGAATTCCTTACATATGATGAAT  
AACTTACCAGACTTCATTGCTAAGTTGAAACACTTTGAGATACCTTGACATTTTCATCATGTTCTATGTGGGTTATGCCCA  
CTCTGTTACTACGCTTTTCAATTTACAGACACTGAAGCTTGAAGTATAGAAAACTTCCAATGAATTTGAGAAATTTGG  
TTAGACTACGTCACCTAGAATTCCACGCTATTACAACACAAGGAAAAATGCCTTCTCATATGGGTGAGTTGATTCATCTT  
CAAATATTGCTTGGTTTTGTTGCAGGGTTTGGGAAGGCTGTAAAAATTGAAGAACTCGGAAATTTGAAAAATTTGAAAGG  
TCAATTGCAACTTTCAAATCTTGAAGCAAGTGAAGGATAAAGAAGAAGCTCTAGCTGCAAAATTTGGTCAATAAGAAAACT  
TACGTGAGCTAACTTTTTGAATGGAGTATAGATATTTTACGAGAATGTAGCAGCTACAATGACTTTGAAGTGTGGAAGGA  
CTTCAACCACCCAAAAATCTCAGTTCTTTGAAAATTACCAACTTTGGAGGGAAATTTTTGCCTGCTGCTACTTTTTGTTGA  
AAATTTGGTGTTCCTATGTTTGTATGGTTGTACAAAATGTGAAAGGCTTCCAATGCTTGGACAATTAGCCAACCTGCAAG  
AACTTGTATTTGTTTCAATGATGTGAGAAGTATAGGAGTGAAGTTTTATGGCATTGACTCCAACCGAAGGGGTTAT  
TTTCCCAAGTTGAAGAAATTTGACTTCTGTTGGATGTGCAACCTAGAGCAATGGGAATTTAGAAGTGGCAATCATGAGTC  
AAATCATTTTGGTCTCTTCAAACCTCTAAAGTTGGATAGATGTGGCAAAATGACAAAACCTGCCAAATGGGTAGAATGTT  
GCAAATCTGTTTCATGAGGTGATAATATCAAATGTCTTAACTTACCTTAAATGTAGAGGAAATGCATAACCTGTCTGTT  
TTATTAATAGATGGGTTGAAGTTTTTGGCCAAAAGGATTAGCTCTCCACCTAACTTGAAGACCATAATGATTAAGGATG  
CATAGAGGATTATGATTATAGCCCTTTCTTAAACTTGCCTTCTTACAAAACCTTTACTTGAACGATGGCCTTGGAAATG  
CCACCCAGCTTCTTAAACAACCTTACGATCTCACTGCCTTAAAGATTTTAGCCATTGAAAATTTTTATGGCATTGAAGTT  
CTTCTGAATGGTTGAGAAAGCTTACATGTTTGGAGACTTGGATCTTGTTCACCTGGTGAATCTTTACCATCTCTTCA  
AGGAGAAGCAATCGTGTGGCGGAAATTTGCGTATGAAACCGGTTGAGATGGAAACATACGAATGTGACAACAAAAGATCAT  
GGTTTCGACTACATTTAAATTTTTACGGTTGTACCTTAGTAGAGCTTGTTTAA

>Cucs.094660

ATGGCGGATTTCTATGGAGCTTTGCTGTAGATGAAGTGTAAAGAAGACAGTGAAGCTTGTGGCAGAGCAAATGGCAT  
GTCATGGGGGTTAAGAAGGATCTTTCAAACCTAAGGACTCTTTACTAATGGTAGAAGCCATCTACGTGATGTTAACA  
GAATCAAGGCAGAACATCAAGCCTTGGGCTATGGGTGGAGAAGCTTGAACATATCGTTTTTGAAGCCGACGTTTTACTC  
GACGAGCTCTTACGAAGATCTTCGACGCAAGGTGGACGCCAGGCCGTTACGTAGTTTCGTTTCATCTCAAAAAATCC  
CCTTGTTTTTTCGCTCAAAATGGCCAATAAAAATTAAGCTATTGCTAAAAGGTTAGACGAGCATTATTGTGCAGCGAGTA  
TCATGGGGCTTGTGCTATAACATCCAAAGAAGTCGAGTCCGAACCTAGCCAAATTTAGAGACAGACTCGTTTTCTTGAT  
GAGATTGGAGTTATAGGGAGGGAAGCTGAAGTATTAGAGATAGTGAATAAACTACTTGAAGTGTAGCAAAACAAGAAGCAGC  
TCTATCTGTTTTACCAATTTGGTATAGGTGGACTAGGAAAAACATCTTTGGCGAAGGCGATATTTTCATCATGAAATGA  
TAAGGAGAAATTTGATAGAATGATATGGGTGTGTGTCTGAACCTTTGTTATCAACAAGATTTTAAAGCAATTTTG  
GAAACTCTTAAATGCTAATTTTGGTGGATTAGACAATAAGGAAGCTTTACTTCAAGAGCTTCAAAAATTTGTGAGGAACAA  
AAAGTATTTTCTGGTGTGACGATGTCTGGAATGAAAATCTGATCTGTGGAATGAGTTAAGGGCTTGTTTGCTAAAGG  
CCAATAAAAAATTTGGAAGTGTATTGTTGTGACTACTAGGAGTGTGAAAGTTGCAAATATTTGTGGAGACAAATCATCAA  
AGACATCGTTTGAAGAAATTTCAAAATGATTTATTGTTGGACTTTATTTGAAAATGTGCATTTGGAAGTGAATTTGCCAGT  
GACTCCAAGAGTTGATCATGTAATCAGAGAAGAGCTTGTAAAAGATTTGGTGGCATACTTTGGTGTGAAAAGTGTGTTG  
GAGGATGGTGAATTTAGACAAGAATAAATGTTGTCAAGGATTCGATCAACTTTGAAAAATCTAATCATAAGTCCATTTA  
CAATATGAAAATAGTATTTTATCTACCATAAAATTAAGTGTGGACAGGCTGCCATCATCTTCATTGAAGCAATGTTTTGC  
CTATTGTTCAAACCTTTCCAGAGGCTTCTTATTTATAAGGAACCTTTGTTCAAATGTGGATAGCACAAGGGTTTTATT  
ATCTACCTAGTGGGAGCAATGTAACGATGGAGGATATTGGAGCAAACCTTTAATACTTTGTTGTCTCGCTCTTTGTTT  
CAAGATGTCGTCAAAGATGACAGAGAAAGAAATCTGTATTGCAAGATGCACGATGTTGTACATGATGTTGCATGTGCTAT  
TTCAAATGCTCAAAAATTTGAGACTGAGTGGCAAATCTAATGGAGACAAAGCTCTTTTCGATCGGTTCATGAAATAGAACAC  
TTCATTGCAGTGAATAATGTTGTTGAACGGTTTACCTGCCAACCTTTGATAGTTCATGATTTTCAATGAGATCAGCAAC  
TTCACCTACTTGTGCGTTTTAATTTATTCATTCATGGTTTATACATCAACTGCCAGATTTCAATGCTAAGTTGAAGCATTT  
AAGTACTTGCATTTTCAACTCTCTAATAAAGAACGCTTCCAGACTCTATTGTTTTCACTCTAATAATCTGCAGACATTGA  
GGCTTGAAGTAAAATTTATGCATCTTCTTACAAAATTTGAGAAAATTTGGTCAATTTAAGGCATTTAGAATTTCTCTCTCA  
ACTCAAACCTAAACAATGCCCAACATCTGAGTCGATTGCTTCAACTTCAAACGCTTTTCGAGTTTTGTAGTCGGTTTTCGA  
CAAAGGATGTAAGATAGAGGAACTTGGACCACTGAATAACCTTAAAGGTGAACTAAGCCTTTTCCATCTTGGAGATGTCA  
AAAGTAAAACCGAGGCTATGGCTGCAAAATTTGGCAATGAAGGAAAACATTTCTGATCTATATTTTCAATGGAGTTTGTTA  
AGTGAAGAGAAGATTTAGTAAACAATGATTTGAATGTGTTGGAAGGGCTTCGACCACACAAAAACCTTCAAGCCTTGAA  
AATGAAAACCTTTGGAGGTTCTGCTTAATGGCCTCTTTGTTGAAAATTTGGTGGAGGTAATTTCTATATGATTTGCAAAA  
GATGTGAAACCTTTGCCAATGTTGGGGCACTTATCTAAGCTTGAATTAATCTCATATTCGTTGCTTAGATAGTGAAGAAAGT  
ATTGGGGATGAATTTTATGGGAACAATAAGTTACCACAATGAGTGGTCTTCATTGTTATTTCCCTAAACTCAAGACCTT  
TCATATTTCCCAATGAAAAGTTTAGAGCTTTGGCAAGAAATAGGGAGTTCATCAAACATAGGTGCGACCTTCTCTCATC  
TTGAAAGCTTGGAGATTGTTGGTGTTCGAAATTTGATGAATATTTCTAACCTTTTTTCAAGTTCTCCAAAGCTTCAATCT  
CTCAAGATTTTTTATTGTTGAAAAATTTGACAAAAGTTACCACATTTGGTTAAATCTCTGCAGCTCCATTGAAAATATGGTCAT  
ATGCAATTTGCTTAACTTAAACAATAATTTCTTCAAATTTGAAAAGTATGCCAAACCTTGTGCTCCTTGGAGCATCAAG  
CTTTTCGAGAAAGTTGCCGGAGGGCTTGGCCACCATTAACCTTGAAGAAATTTGGATGTTTATGGGGAAATGCAAGGTTT  
GATTTGGAGTCCATTTCATGTTCTCAATTCATCGAATTTGAAATTTCTTTCGTTGACATTGATTTCTTTGCCAGAATGGTTGGGAA  
CCTTACATCTTTAGAGACGTTAAATCTACGTTATTGCAAAAATTTGAAAAGTTTCCCTTCAATAGAAGCCAT

>Cucs.094670

ATGGACTTATTGTATTCCAAAAATTTAGAGGACAAAATACTGTCAAACCTCAGAGACTCTTACTTATGGTGGAAAGCCAT

TCTTCGTGATGTCGACAGAAATTAAGGCAGAGCATCAAGCTGTGAAGCTATGGGTAGAGAAGCTTGAAGCTATTATTTTCG  
AAGTCGATGTTCTACTGGATGAGCTCGCTTACGAAGATCTTCGCCGCAAGGTTGAACCCAAAAAGAGATGATGGTAAGT  
AATTTCAATTTCTTTCTCCAAAACCCCTCTTGTTTTTCGCTCAAAAATGGCCAATAAAAATCAAGAACATTTGCTAAGATGTT  
GGAAAGACATTATTCTGCTGCTAGTACTGTGGGGCTTGTGTCTATATTATCTAAACAGACTGAACCTGATTTTAGCCAAA  
TTCAGGAGACAGATTTCGTTTCTTGATGAGTATGGAGTTATTGGGAGAGAAAGTGAAGTTTTGGAGATTGTGAATGTATCT  
GTCGATCTTAGCTATAGGGAGAATTTGTCTGTTTTGCCAAATGTTGGCATGGGTGGATTAGGAAAGACAGCTTTGGCTAA  
GGTAATATTCAATCATGAATTGATAAAGGGGAATTTTGATAGAGCTGTATGGGTGTGTGTTTTCGGAACCTTTCTTATCA  
AGAAGATTTTAAGAGCAATTTTGGAAACTCTTAATTTCTCAATTTTGGTGGCTTAGATAGTAAAGAAGCCTTACTTCAAGAG  
CTACAAAAGTGTGTAATGATAAAAAGTATTTTCTAGTTCCTTGATGATGTTTGGAAATGAGAATCCTATCCTCTGGAATGA  
GTTGAAAGGTTGTTTTGTTAAAGATTAGCCAAAAGATCTGGAATGTTGTTGTTGACTACTAGGAGTGACAGAGTTGCTG  
AAATCATGGAGACACATTAGATATCATTGACAAAACATCTCCAGATGACCATTGCTGGCTTTTATTCAAGAAATATGCA  
TTTTGAAATGAATGCTACGAATTCCTGAATTTGATATTGTTTCAGAAAAGAGCTCGTTAAAAGATTTGGAGGCATACCATT  
GGCTGTAAGAAGTATGGGAGGAATCGTTAAATTTGACGAGAATCACGAGGGATTGCAGAAATCTTTGGAGAATCTAATGA  
GACTTCAATGCAAGATGAAAACCATGTTGTATCCACAATAAAGTTAACTGTAGATCGCTTACCATTGCCATCGTTAAAA  
CAATGTTTTGCCTACTGTTCAAATTTTCCAAAAGACTTTAAGTTCAGAAAAGAAGCCCTTATTAGATGTGGATAGCACA  
AGGCTTTATTCAACCGTCTTTGGGAAGTATGAAATGATGGAGGATATTGGTGAGAAGTACTTCAATGTTTTGTTGTCTC  
GCTTCTGTTTTCAAGATATTGTCAAGGATAATAGAGGGAGAATTAATTTCTGTAAGATGCATGATCTTATACATGATGTT  
GCATGTGCTATTTCAAATCTCAGGATTGAAATGGGACTCTCCAGATGACATTTGTTTGTATGGAGAACCCTTGGAGAGTCAAGC  
TTGCTTTGCTTAGCCTTGAACATAAAACGCCAGATTGTAATGAAAATCCCTTCTAGAAAAGTTGCACATGTTGACATTTGATA  
GTCATGTGTTTCAACAATAAGGTCACAACTTTCTCTACTTGCGGTTTTAATTACACATTCGTGGTTTTATATGTAATTA  
CCAAATTCAAATGCTAAGCTGAAGCATTGAGGTATCTTGACATTTTCATATCTACCATAAGGGAGCTACCAGATTCCGC  
TGTTTTGCTTTATAATTTGCAAACTGAAAGCTTTCAAGATTTTTAAACGCCCTTCCAAAAAATTTGAGGAAGTTGGTTA  
GTTTAAGACATTTAGAATTTTTCTCTGATCCTTGAATCCTAAACAAATGCCTCAACATTTGGGTAAATGATTCAACTT  
CAAACGTTGCTAGCTTTGATGTTGGGTTGATGATGGATGTAAGATAGAAGAACTCAGATCTTTGAGAAATCTTAAAGG  
TAAGTTAAGCCTTTTATGCTTTGAGCGAGTGAAGAAGTAAAAAGGAAGCCATGGCTGCAAAATTTGGTGGAGAAGGAATA  
TTTCATATCTGTCTTTTTTATTGGGCCTTGAGATGTGAAAGATCAGAGGGGAAGCAACTACAATGATCTGAACGTGTTAGAA  
GGACTTCAACCACATAAAAACTTCAAGCTTTGAGAATTCAAAACTTTTTAGGCAAACCTTCTGCCCAATGTTATTTTTGT  
CGAAAATTTGGTGCAGATATATCTACACGAATGCGAAATGTGTGAAACTTTACCAACACTTGGGCAGTTATCAAGCTTG  
AAGTACTCGAACTTCGTTGTCTATATAGTGAAGAAGTATGGGAGAAGATTTTTATGGGAATTACCTTGAGAAGATGATT  
TTATTTCCCAACATTTGAAAGCATTTCATATCTGTGAAATGATCAATCTAGAGAATTTGGGAAGAAATTAAGTTGTATCAA  
TGGTACAATCTTTCCAACCTTGAAGCTTCAACATTTGTTGTTGTTGTTGTTGTTGTTGTTGTTGTTGTTGTTGTTGTTG  
CTCAGCATGAGAGTTTCAATTTCCAAGCTTACAACATTCGGCAAAGCTTCGATCTCTAAAGATTTTTGGGATGGAAGTTG  
CAAAAACAACCAATGGTTTTAGAATTTCTGCAGCTCCCTTGAAAAATGTGGATAAGCAACTGTTCTAACTTGAAC TACC  
TCCAAGCTTGCAAGATATGCAGAAATTTAACTTCTTTAAGCATAACCGAGTTTCGAAAGCTGCCAGACGGGTTAGCTCAGG  
TTTGTAAGTTGAAAAGCTTGAGTGTTCATGGTACTTGCAAGGTTACGATTTGGAGTCCCTTGTACATCTTGGTTCACTC  
GAAAATCTTGTTGGTTGACTTGGATGGAAGTGGTGCATACAACCTTCTCAACAACCTTGAAGCAACTCACTTCTTTGAG  
ATCACTGCATATTTGCAATTTAGTGGCATTGAAGCGCTACCAGAATGGTTCGAAAACCTTACATGTTTGGAAACGTTGA  
AGCTTTACAATTTGTGTAACCTTGAAGACATGGCGTCAAGGAAGCTATGTCAAAACCTTACAAGATTAACGAGTCTACGA  
GTTTATGGATGTCCAACTTAATACTTTTTATGTTTAAATGGTATGTCACCAAAATTCCTCGACGAGCTCTTCCCGAACCTT  
ATCGACATTGGAATGA

>Cucs.102240

ATGGCGCTGGAATTTGGTGGGTGGGGCTGTTTTGGGGGCTGTCTGTTGGGGAGCTATTCAAAGCGATCTTGAATCTGGGTGA  
AAGGGCCATCAGTTTCAATCTGTTCTTAAAGGATATCCGTTCCAAGCTTAATGCTATAATGCCTTTGGTGAAGCAAATCG  
ATGAGCTTAATGATTATCTCGATTACCCAAAAGAAAGAAACAGAGAAATTTAGGGGCTGATGGATGAAGGGAAGCAGTTG  
CTTCTCCAGTGCGGCGATGTGAAATTTGGGGGATCTTAATTTATTTGAAGAGACCATCTTACACCCAAAAGCTTCGGGAAT  
GGATACTGCACCTCGAAGCTTCATGGATGTTTTGATGTTGCAGATGGCTAGAGATCAGAAGAAGAACATGAAGATGATGA  
ACCAAATGATGGAGATCATTGTAGACTTGATAATAGAGTGGGTCGAGTAAACCTATGGATTTGTTTGTCCACCATGT  
CTGGTTCCCTCAACTGCGAGAAGAAACCGTTGGGTTGGAGAAGCCAGTTAAGGAGTTGAAGGTGAAACTTCTCAAAAATGG  
GGTTCAAATGTTGGTGGTGACAGCTCCTGGTGGCTGCGGAAAAACCACACTGGCCTTAAAATTTGCCACGACAAAAGAAG  
TCAAAGATATATTTCCAGGAGAAGATCTTTGTCCCAGTTTCAAGAAAACCAGATTTGAAGCTTATATTGAAGATATAAAT  
GAAAGCCTTAGAGGAATTC AATTGCTGATTTGCAAAGTATGAACGTGCATTCTGCTATTTAGAATTTGGTTGAAGCA  
GACAAGTGTAAATCGTCTGTTTTGATTGTGTTAGATGATGTGTGGAGTGGGCAAGAATCTGAAGTTCTTCTTGATAAGC  
TGTTTTCAATGCTTGTGCAAGATCTTGGTCACTTCTAGGTTTTATTTCCAAGATTTAGTGAGTCTTATATTTGGAA  
CCTTTGAACCATGAGAATGAGTACAACCTTTTTCGTCGTGCAGCATCCTGGACAAAGGAATTTCTAAGCTCCCGCATGA  
TGAAACTGTAGAAAAGATAAATTTGGGGGATGCAAGAGACTACCTCTTGCACCTGAAGGTAATCGGGAGGTCTCTTTCCACA  
AACCGACATCTGTTTGGAAAGTAAACGGGGAGGAATTTGGCTAGAAGTGGCTCCATATTTGATTCTGACAATGAACCTTCT  
GAATGCCCTCAGAGCAGTTTGGATGCTTTGGATGATAACATGGAACCTAAGAAGGTTTTATGATTTAGGCTTTTTCA  
TGAAGATCAAAGAATTTCTGCTTCTACCTTCAATGACATGTGCACAGTTTTGTACACACTAGACGAAAGTGAAGCAATGG  
TTACCCTTGACGAACTATCCTCTCGAAGTCTAGTTAATTTGTACACAGCGAGAAAATATGGATATGATGATGACTTTTAT  
GAAGAGTACTCTTTTACTCAGCATGATATTTCTCAGAGATTTGGCTATTCACTTGTGATGAATATGGAGCCCATAGAACAAG  
GAAAAGATTGATCTTAGACATTAATGAAATGATCTTCCCAAATGGTGGTTGATCAAGAAAAGCATACTTCCATGCTC  
GCCTTATATCCATAACCAAGATAAGAGATTTCTCAGCAAGTTGGCCTGACATGGAAGCACCTGAAGTGGAGGTTCTGATT

CTTAATCTTCAGTCAAGAACTTACAACCTGCCTGGGTTTCATCAAAGAATGAATAAGCTGAAAGTTTTGATAATCACATA  
TTTTGGTCTTTTCTAACTGAGGTGACAAGTGAAGATAATCAACTACTCGACAGCCTAACAGTCTTGAACGAATCAGGT  
TTGAGCGGATTTTCAGTTCCTATCTTTAGTAATCCAAACCCGAAACCCTGATAAATCTGCAGAAAATATCCTTCTTTATG  
TGCAAATTTGGTCAAACATTCATGGATCCTTCAACCCCAATCTCAGATTTGTTGCCAAACCTGCTGGAGATTTCCATAGA  
CTTCTGCAACAATTTGAGTGAAGTCCCAATAGGTTGTGTGAAATGTTCAGCTTGCAGAAGCTGAGCATTACAAATGGCC  
ATGGACTATCTTCTTGGCAGAAGATGTAGGGAAGTTGATTAATCTAAAAAATCTAAGGCTAAGATCTTGCATTCAATTA  
GAAGAGTTTCCAGAGTCGACAACGAAGCTTCGGGAATTAGTCTGCTTGTATATCTAAGTGTATTGGTCTTGCCAAGCT  
TCCCAGAGAAGATTGGTGAATTTATAAATTTAGAAAAGCTTACATGAGACACTGCTGGAGTTTGGAGCAAGCTGCCACTGT  
CGATTGGAAAGCTGAAAAATGTGAAGTTTTATGTGATAGAGAGGTTGGAGAGTGGTTGAGAAAGGTTGCACCTCGCCTT  
GCCAAACAGGTGAAAGTGAAGAGGAAGAAGCCAACTGGAGTGGCTTGGTTTTTGA

>Cucs.123410

ATGGCGGTTACAGATTTCTTTGTTGGAGAGATAGCCACTGAGCTTCTCAGAATGATGGTACAACCTTTCGACCAAAATCCTG  
CCTTTGTAACGACGGCAGCTCAAATCGCCAATTTCTATTCAACAAATTTCTGCCGATTATGAAGAGATCAAGTACTCGG  
GAGTTGAATTACCCGCTCATCGCCAATTTAGTGTAGATCGCTTACGCGAACTCTTAGAAGAGGCATCGAGATTTCCGAG  
AAGGCTCTTCAATGTGGCCGATTAACATTTACAGAACTTACGGCTCGCGAGGAAGATGGAGAAGCTTAAAAGGATAT  
ATGTCGATTCATTAATGGCACCATGCAGGCGCATATACTGGCCGACGTGCATCATATGAGATTCAGACCACCGAGCGGT  
TTGACCGGCTTGAAGGTGTTTTGTTGGAGCGCGGCTTGAGTCGATGAAGATTAGAGCAGATGCTTCGGGAGAGGAAAGG  
TGGTGGGTTGAGGAGCGTTTTAAGAAGGCGAGGAGGAAAGGATGAGAGTAATTTCTGTAATATAGAACTGGATT  
GCGTGTGGGGAAGAGAAAATGAAGGAGCTGGTGAATTGAAAAGGAGGATTTAACGGCGGTTGGGATTAGTGAATGGGG  
GTTCCGGGAAGACTACTTTAGCTAGAGAATCTGCAAAGATCCGGAAGTTCGAAGACACTTTAAAGAGAGAATTTTGTTC  
TTAACGGTGTACAGTCCCTGATGTGGAGCAGCTGAGGAGAACGATCTGGGAATTTGTGATGGGTAGTGATAGTGTCAA  
TTCTAATAATTTGATTTTACATGGGAGGCTTCAAATTCAGCGCTTTTGGTCTTGGATGATGTGTGGTCAATTTACGTTT  
TTGAAAATGTTATTCCAAACGTAACCTGGTTGCAAACTCTTGTGTTTTACGATTCAAATTCCTGAAGTCTTAGAGAA  
ACTTATGAAGTAGAGTTGTTGAAAGAAAGTGAAGCAATTCCTGTTTGGCCACTCAGCTTTCGGACAACAGTCGATTCC  
TTTGTCTGTAATCACAACCTGGTCAAACAGGTTGTGAATGAATGCAAATGTTTGCCTCTGGCTCTTAAAGTCATAGGAG  
CATCACTCAGAGGACAGAGCGAGATGTTCTGGAATAATGCCAAGTCTAGGTTGTCACGTGGCGAGCCTATTTGCGAGTCC  
CATGAGAACAATTTGCTTCAAAGAATGGCAATCAGTATTGAACGCTCTCGAGTAAAGTGAAGAAATGTTTCTCGACCT  
GGGATGCTTTCCTGAAGACAAAAGAATTCCTCTTGACATTCCTCATCAATGTTTGAAGGAGTTACATGATCTTGATGACG  
AAGAAGCTCTTGCTGTTCTTTTCGAGTTATCTCAGAAGAACTTCTTACGTTGGTGAAGATGCACGGGTTGGTGACATT  
TATAGCAGTTATTTAGATGATGTACTCAACACGATGATTAAGGGACCTTGCCTTCAATTCAGTTGCCAGGAGAA  
TGTGAACGACGCAAGCGATTACTGATGCCAAAAGCGCACAGAGCTTCCAAAAGAATGGTTAAGGAAATCGGAACAGC  
CATTTAATGCCAACTTGTTTCAATTCACACAGGTGAAATGGAAGAAATGGATTGGGCGCCTATGATATTTCTGAAGCT  
AAAGTGCTCAATTTAACTTCTCCTCGAGTGATACTTCTGCCTTCTTTTCTTTGCAACATGCCGAAGATAAGAGCATT  
AATTGTGCTAAATAACAATGCAACACATGCAACTCTCACAATTTCTCAGTTTTTTCTAGTTTGGTCAACTTGAGAGGCA  
TCTGGCTGGAAAAATTTCCATGACACAACATTTTCATGCTTGCACGCCATGAAACATCTAAGGAAGCTATCTTGT  
TTCTGCAAGATCAACAACAGCCTCGACGAGTGGGCGGTAGATGATCCAGATCTTCCGTTTTCTTTGCAACTCAAAT  
TGATCACTGCAACGACTTGCCTAAGCTACCTTCAAGCAATTTGTGAGATGCAAGTCTCAAGTGTCTTAGTCTCACCACT  
GTCATAATCTCAGTCAACTCCCTACCACTTATGGAAGCTGAAAATCTCAAATCTTGAAGTCTTGTGCTTGGCCACTC  
CTCAAACCTCTATCCCAAGCATTTGTGTACTTTCTTGTCTAAAGTACATTTGACATCTCCCAATGTGTTTACTTAACCAG  
CCTTCTGAAGAAATTTGGCAAGCTGACAAGCTTAGAGAAAATTTGACATGAGAGAATGCTCACTCATAAGGAGACTACCTA  
GATCAGTTGTGCTTTGCAATCTCTCTGTACGTAATCTCGGAAGAAGCTCTCGTGGCTATGGGAGGATTTGAAGAGT  
CATATGCCTAATTTGTACATTCAGTTCGCCGAGAAATGCTTCAACTTAGATTGGCTCAAAGAGTGA

>Cucs.128020

GGGGCGTCAAGTAAAAGTCACTTGCTGGAGAATTGGCTTCAAAAACCTGGAAGAAGCTCTTTATGCTGTGGATGTGCTTGA  
TGAACCTCTCCAGGAGGCTCTTCATCGAGAAGTGTACTAGAGATAAAAAATGCAAAACAAGTAAGGATCTTCTTCTCCA  
AATCTAATCAAATCGCATTTAACTACAGGATGGCTCGTCAAATAAAGAAAGAGGTGATCGGGAGGAATGATGATAAGAAA  
AAGGTAAAGCACCTTTTTATGGATGATGTATGGAATGAAAGTGAAGAGAAATGGCATGGGTTGAAACCTTTGTTAATGAG  
TGGTGGCAAGGGAGTAAGATTTTCATCACAATGCGTGATAGTAAAATAGCTGCAGAAATGAAAGCATGACTTCTTTAT  
TCACTTTAGAAGGCTTACCGAAGAGTAAATCTTGGTCATTATTTAGTAAAGTGGCATCCAAAGAAGGCAAGGTGCTTGA  
AATTCAACTTGTACAGTTAGGAAAAGAAATTTAGTGAATGTGGAGGTGTTCCCTTGTTTAGACATCTTCGATATCC  
AAACCTCCCTGAAAATATTTAGAAATCACTTCAAATTTCAATCACTGAATGCAAAACCTGCAAAATGCTAAATCTAATGT  
ACTGTAGCGAACTAATGGAATGTCAAGGACACCAGAAATCTTATTAATCTTAGGCATCTTGATTTCAATAGTTCTACC  
TTAACCCATATGCCCAGAGATGGGGAAGTTGAATTTGCCACAGACACTAAGTTATTTTGTCTTGGACTACGAAAGGTC  
TAATCAGCTGAGTGAACCGACTGTGTTGATCCATTTAAAAGGAGATTTAAGAATAAAAAATTTAGAGCAACTGAGTTACA  
ATCCATCTGAACCTCAGTTTGTAAACCTGAAAGACATAAAAGGCTTCAAGAATCTGGAAC TAGAATGGAACCTAAGCCCA  
GATGATCAAGAAATGAAGTGAAGGATGATGAACTTCAGCAATGGAAGGCTTAGAACGACATTCAAATGTTGAATCTTT  
GCACATTTGACGGGTACAGCGGAGTAGGATTACCAATTTGGTGTCCACCTTGTCTTGAAGTAACTAGAAATACAAATTT  
ATAAATGCCATAGATTGCAACATCTAACACAGATAGCCCATCTTACGGCACTCACATTTCTATTTTTGGATGACATGAGC  
TCTCTTGTGTTTATAGACAAGAATGAACCATCTTCTCTGCTCTTTCCCATCTCTCGAGCTTCTAATTTATCGAAAACAT  
GCCGAATTTGGAAGGATGGTGGGAATTAGGGAACACTCAAAAAATTTGGTTACCACCACTTTCTCTACGCTGATTTCCC  
TGCATATCTCTAGGTGTCTAAGTTTAGATTTCATGCCAAGCCAGCTTCAACAGGAACAGTTGTGTTCTTACGTGATGTG



AGCGTTCAATTGGAGACTACATTAGATCCATTGTGGGGTTTGAATGTCTAACACTGGAAAAATTAAGGATCTCAAATA  
TCTAGAAACCATGGAATCTCAGCTAAACATCAGTTCTTTGCCAATACAACCTTCGAGATTTAGAAATAAAATAATGCTCGA  
ATTTGATGAGTTTACCTGAATGGATTAGCAGCATTACTTCGCTAGAGGAGCTGGAGATTTATGAAATGCCCGAAACTAAAA  
GTAGCTTTTGCATCGGCGGTTGCCCGAAGTAG

>Cucs a.128030

ATGGCCGAAGCAATTCTCTTCCAAGTTGCTGGGGAGATCTTGATGAAGCTAAGCTCTCAAGCTTTCCAGCGTCTTGGGAT  
GCTATTTGGGCTGAAGGGTATCTTAACAACTCACAACAACCTGTTTCCACCATTAAGGATGTGCTTCTTGATGCGGAGG  
GACGTCAAACATAAAAGTCACCTTGCTGCAAAATTGGCTCCATAAGCTGGAAGAAGCTCTTTATGATGCAGAGGATGTGCTT  
GATGAACTCTACGGAGGCTCTCCGTCGAGAAGTATGACTAGAGATCATAAAAAATGCAAAAACAAGTAAGGATCTTCTT  
CTCCAAATCTAATAAATTGCATTTAATTATAGGATGGCTCGTCAAATAAAGAATATTTGGGAGAGGCTAGATGCTATTG  
ATGCTGAAAAACACAATTTCACTTTCGCTGAAAACCTGTGAATCACGGACTCAATACGGTTCATTTGATCGAATAATGATG  
GGAAGGGAACTTGGTCTTCTTCAAATGACGAGGAAGTATTGGAAGGGATGATGATATAAAAAGAAGTAAAAGAGCGTTT  
ATTGGATATGAATATGAATGTCACGCATAATGTTTCGTTCAATGCTATAGCTGGAATGGTGGGATAGGCAAGACGACCT  
TGGCTAAATCTCTTACAATGACGAAGAGGTATCAGGATTTTTCGACTTAAAAATATGGTGGTGGTGGTGGTGGTGGTGGT  
GAGGTACAAGTGGTAGCGGAAAAAATGATAGAATCAGCAACCAAAAAACAATCTTAGTGTAAAAGGAATGGAAGCTTTACA  
AGCAAAGCTTCAGAAAGTATTGGAGAAAGGAATCTGTAGTTATGGATGATGTATGGAATGAAAGTGAAGAGAAAT  
GGCATGGGTGAAATCATTGTTGATGGGTGGTGCAGAGGGATGAAAGTGGTGGTGGTGGTGGTGGTGGTGGTGGTGGTGGT  
ACAGAAATCAAAGCATGACATCTTTGTTCACTTTAGAAGGCTTATCAGAGAGTAATTCCTGGTTATTGTTAGTAAAGT  
GGCATTTAAGAAGGCAAAGAGTCCACAGATCCAAGCAGGATACATTTAGGAAAAGAAATTTAGTGAGATGTGGAGGTG  
TTCTCTTGTATAAGACATGTTGGACGCATGTTATACTCTAAAACCTCACAAGAAGAGTGGATGTCCTTCAAGGATAAT  
GAACTTTTGAAGTCAATCAACAAGACAATGATATGACATCAATATTAATAATGAGTTATAACCATCTCCACCAAATTT  
GAAACGATGTTTTGCATATTCATCCCTGTTTCCCAAAGGATATAAAAATAGAAAATAAAGACCTAATAAGGCAATGGGTGG  
CTCAAGTTTTATTGAAGTGTCAAATGGAAGAAAATCCTTGAAGATACAGGGAAGGACTATTTAACGAATATATGTTGG  
AGGTTTTTTATGCAAAATCTAGTGATGAGTGAACATCAATGATATTTGTTGATGATGATGATGATGATGATGATGATGAT  
AAGGAAGGTGGCAGGAAATAAATATATGTACGTGGAATCCCAATAATGATATGTTGTGTCAGCGAACAAACACTTCACA  
TTTCATTTGACTACGGAATAACAATCATGGCAAGATGTTCTATCTAAATTAATGCAAGGCTAAGGGATTAAGAACAATCCTT  
TTATTATTTGCTCCCTACGAGAAAATGAATAAAATGATAAAGCTATTTTGGATGAATTAATTTCCAGTTTCCACGTTT  
GCGAGTATTAGATCTTCAATTTCTCGCAGATTTCTGTAGTGCCGAAGTCTATAAAAAAATCTAGACACCTTCGATATTTGG  
ATCTCTGTGAAAATGATATGGAATTAATCCACATCTATCATGAAATGCAAAATTTGCAAAACACTAAATCTAATCAGAA  
TGCTATGAGTAAAAGATTTGCCAAGGACATCGCAACTCTGTAAATCTCAGGCATCTTACCTTTGAACTTGTATGGA  
AGTAACTCCTACATCGGAGGGATGGAGAAGTTGACTTGTCTACAAACAATCAGTTTTATTGTTGTTGATGCAAAAAGA  
CCAATAAGCTATGGGAATGAATGATCTCAGTTATTTGACAGGAGAGTTAAAAATCATAGGTTTAGAGAAGTTGAGGTCT  
TCTCCATCTGAAATCACCTTAATAAACCTGAAAGACAAAAAGGTTGGCAAGGTTAAATTTGGAATGGAAGCTGGGCAA  
GGATGAATACGAAGGTGAGGCTGATGAAACAATAATGGAAGGCTTGGAAACCACATCCAAATGTTGAATCGTTGAGCATT  
ACGGGTACACTGGAGGAGCATTGCCCAATGGGTGTTCAACTCGCTTATGAAGTTAACTGAAATGAAATGAAAATGCA  
CCTAGAGTGAACATCTACCTCAGTTCAACCAGCTCAGGATCTCAGAGCTCTACATTTAGTGGGCTTAAGATCTCTCGA  
GTTATAGATAAAGAGTATCCATCACTCACTCAGTGTGTTTTCATCTCAAGTTTCTACGTTTACGTTTACGATATGATG  
ATTTGGAAGGATGGTGGGAATTAGGGGAATCAAAGTAGTAGCAAGGGAGACATCTGGGAAAGCTAAATGGTTGCCTCCA  
ACTTTTCTCAATTAAGTCCATGCCAAGCTAGCTTCTATTTGGAGCAGATGTTATTTTACATGATATTTGGGGTTCAGAT  
GGTGAGTACCATAGGTCCAGTATCGAGTTTTATGTTTCTATCAATGCATGGAATGACGAATCTCAAATATTTATGGGAGG  
AATTTGAGCAAGATCTAGTTCTTCAAGTACCTCAACAATGTCCTCACCTATTTCCCTCGTTATCTGACAATAAGTGG  
TGCCCTATCTCATGAGTTTACCGAATGGATTGGCGTCTCACTCCCTTGAACATTCATATTAAGAATGTCCAAA  
ATTAATAACTACTACGAGAAGGAATGCAGCAACTCAAATCTTGAAGAAGTTCACATAGAAGACTGCCCTGAACTAGAGG  
ACAGATGCAAGCAGGAGGAGGATTGGCCAAACATTTCCACGTTTCCCAACTTTACTTACAAAAATGCCTCTGACATT  
GACACACCACAATCTTCTCAGGTTTTTACACCATCCCTTTTCAATCGTTCTGATCTCTGTTATATAG

>Cucs a.128100

ATGGCGGATTCAGTTCTGTTCAATGTTGCTGCAAGTGTATTACTAAACTGGGATCTTCCGCACTTCGAGAAGCTTGGGTC  
TCTGTGGGGAGTCAACGATGAGCTCGACAACCTCCAAAACACTCTTTCCGCCATTAAGCCGTCCTTCTCGATGCAGAGG  
AGCAACAGTCCAAGAGCCACACAGTCAAGGATGGATTGCAAAGATCAAAGATGTTTTCTATGACATTTGATGACTTGTAT  
GACGAGTTCTCTTATGAAACCTTGAGAAGACAAGTCTTACCAAGGATAGAACAATCACCAAAACAAGTACGTATCTTCTT  
CTCCAAATCTAATCAGATTGCTTTTGGTTTCAAATGGGTCAAACAATTAAGGTTAGGGAGAAGCTAGATGCTATTG  
CGGCTATTAAGCTCAACTTCACTCTCTGTGTGTCGAGGGAGGTACGAGATAATGAGCCAAGGAAGGTACGAGAGACG  
TCCTCATTCATACCCGAGGGGAAATCATTTGGTAGGGATGAGGATAGGAAATCTGTTATGGATTTTCTATTGAATACCAG  
CAACATCACAAGGATAACGTTGAAGTGTTTCCATTTGTTGGAATGGGAGGATTAGGAAAGACAGCACTCGCTCAAACCTG  
TCTATAATGATGAAAAATAAACAATCGTTTTAAGTGGAAAATATGGGTGTGATTTTCTCAAGAATTTGATATCAAAGTA  
ATTTGAAAAGATTTTAGAGTCTATTACGAAAAACAAGAATCCCTTCAGTTGGATATATTACAAAAGTATGCTTCA  
AGAGAAAATTTATGAAAAAATACTTGTGGTTCATGGATGATGTGTGGAATGTAGACCAGGAAATGGATTGGTCTGA  
AAAGATTTCTGATGGGTGGTGCAGCGGAAGTAAGATTTTGGTGACAACCCGTAATCTACAAACTGCCAGGCTTCTGAC  
ACGGTTTGGTTCATCACTTAAAAGAAGTTCACAAGGATAACTCTTGGGCGTGTGTTAGGAAAATGGCATCTTAAACAA  
AGAAGAAGAGCTTGAGAATCAAATTTGGTTAGAATCGGTAAGAGATTGTAGCAAAGTTGAAAGGTTATCCCCTTTCAA  
TAAGAGTTGTTGGAGCTCTGTTATATTTCAAACAACAGAAATGGATTGGTTCATCATTTAAGGACAACGAACTTGACTCA

ATTTTGCAAGAAGATGATCAAATTC AACCAATACTGAAGATAAGTTTTAACACCTTCCACCTAAATTGAAGCAATGTTT  
TACGTACTGTGCTTTGTTTCCCAAGGATTATGAGTTTTAAAAAGAATGGATTGGTAAAACAAATGGATGGCACAAGGTTTCA  
TTCAAGCACATAATAAAAAGGCAATTGAAGATGTGGGTGACGATTATTTTCAAGAGTTAGTGGGGAGGTCATTCTTTCAA  
GACATAAGAAAAACAATGGGGAGACTTAAAGTACTGTAAGATGCATGATTTGTTACATGATCTTGCCTGTTTCGATAGG  
AGAAAAATGAATGTGTGGTTGTAAGTGATGATGTGCGGTCCATTGACAAAAAGGACTCGACATGCCTCATTTCTCTTGAGCA  
AGAGGCTAACAAAGGGAAGTTGTATCAAAATCATCCATTGAGGTAACGAGTTTGAGAACATTGGATATTGATAGTCGTGCT  
TCTTTCCGTTCTTTCAAGAAAACCTTGTACATGAACCTTTTTCAATTACGAACATTGAATTTGGATAGATGCTGCTGTCA  
TCCTCCTAAGTTTGTGATAAGTTGAAACATTTGAGATATCTTAATCTTTCTGGTTTTAAATGTAACCTTTCCCTCCCAATT  
CTATTACCACATTGTATAATTTGGAAACACTTATCCTTCTGTTACTGCCTTTGGCTAAGAAAATTGCCAAAAGATATTAAC  
AATTTGATCAATCTCAGGCATCTTGATATTTATGATTTGTTCCAGTTTGACTCACATGCCAAAAGGATTAGTGGGATGAC  
TAGCCTCAGACAATGATATGTTTGTATTAGGAAGAATAAAGTTGGTGATTTAAGTGCATTGAATGGACTTAAAGACT  
TGAGAGGATTATGTATGATTAAGGTTTTACAATTTTGCACAACTGCTGATTTAAAAAATCTGGAATTACACTGGGATATA  
AAAATGGATCATGAAGATGCCTTAGATGATGGTGATAATGATGATGAGGGAGTTTTGGAGGGCTTAAAACACATTCAA  
TATTCGCAAAATGATTATAAAAAGGATACAGAGGAATGAAGTTATGTGATGGTTTTCTTCTAATTTCCCTGGGTGGTTTTGG  
TTAGCATAGAGCTTTACATGTGAAAAATTTGGAGCATCTCCACAGTTTGATCAATTCCTATATCTCAAGCATCTTCTT  
CTTGATACTTACCCAATATTGAATACATTGATAGCGGCAATTTCTGTTTCTTCATCAACAACATTTTTTCCATCTCTCGA  
GAAGCTAAGGATTGAGAGCATGCCTAAGTTGAAAGGGTGGTGAAGGGGGAAATTTCAATTTCCAACAACAATATTACATC  
AACTCTCAGAAATTAATGATTTTATTGTTCTGTTGGTCTTATTCCACAACATCCATCTTTGGAATCATTGAGAATA  
TGTGGTGTAGTGTGCAACTTTTTCAATGTAATACGAATGGCTACAGACCTTTCTGAACATTCTTCTTCTTCTTCAAC  
ATTGTCTAAATFATCTTTCCCTTGAGATTGGAACATTGATCTTGAGTCTTGGCAGTGGAGTTATTCTGCAATATGACAC  
ATCTTGAGTCTCTTATCATAGAACGCTGCAAAAGTTTACAATGTCTTCTCCGCATCCTGTGATGAGGATAATGATGTG  
GTATGGAAAAACTCAGCAATCTCCGGACTTCCGGCTTGAGAGCATCTCAAATTTGGAGTATTTTCCCAAGAGTTTGAA  
ATATATTACAAGTCTTGAACCTTTGAAGCTATCAAATTTGAAAAATTTAGTGAGTACGGAAGGGGATTGGCGAACTCATT  
CACTATCACATTTGGAATTTGATAGATGTCCTAATTTACCTATATTGTCCGGAAGATGTCGGCGACCTCATTTCCTATCA  
CACTTGCTTATTTGGAATTTGCCAAATTTCCAAATTAACCTTCTTGTGCAAGGAATCACTCGCCTCACTTCACTCTCAAGTTTGTG  
TCTTGAAGATTGTCCCAACTTAGTCTCTTGGCCCAAGAAATTTCTCCACCACACAGCTCCTTACCAGGAGGACGGTTCT  
TGAGAATTTTGAAGTGTCCCAATTTGCAGATTCAAGACAAGAAACAAAAGGAAGAAGAAGAAGACCAGGAGGATTGG  
AATGAACCTCATCCATGTATTGACCGGATGTAGGTAA

>Cucs.128110

ATGGCGGATTCTATTTTGTTC AACGTTGCTGCAAAATGTTATAACCAAAATTTGGGCTCTTCCGCGCTTCGAGAGCTTGGATC  
ATTGTGGGGAGTTAATGATGAGCTTGGAAAACACTACAAAACATTCTTTCAGCCATCAAAGCTGTGCTTCTCGATGCAGAGG  
AGCAACAATCAGTGAGCCACGCAGTCAAAGATTGGATTTCAAAGCTTAGAGATGTTTTCTACGACGTTGATGACTTGATT  
GATGAGTCTCTTATGAAACCTTGAGAAGACAAGTTCTTACCAAAGATAGAACAATTACCAAACAAGTATGATCTTCTT  
CTCCAAATCTAATCAGGTTTCATTTGGTCAAAAATGAGTCAAAAATTTAAACAAGTTAGGGAGAAAAC TAGATGCTATCG  
CTAATGATAAAAAC TCACTCCACCTTTCTGTCCGATGAGGGAGACACGAGATGATGAGTTGAGAAAAGATGCGAGAGACT  
TGCTCTTTTATTTCAAGGGAGAAGTGATTGGTAGGGATGATGCAAGAAAGCTATTATAGATTTTCTATTGGATACCAA  
CACCTAGGGAGATAATGTTGAAGTGGTTCCATAGTTGGCATGGGAGGATTAGGAAAGACTGCAGTTGCTCAACTCTGTTTT  
ATAATGATGAGAAGATAAATGAACATTTTAAAGTGAATTTATGGGTGTGCATCTCTCAAGAGTTTGATATCAAAGTAATT  
GTTGAAAAGATTATAGAGTTTATTGCGAAAAAGAAACCCGATTCTCTTCAATTTGGATATACTACAAAGTATGCTTCAAGA  
AAAAATTTGATGAAAAGAAATACTTGTGGTTCATGGATGATGTGTGGAATGAAAGCCATGAAACATGGGTAGTCTAAAGA  
GATTTTTAATGGGTGGTCCCAAGGGAAGTCCGATTTTGATCACAACACGTAATCTGCAAGTGGCACAGGCTTCTGATACA  
GTTCAAGTTTCATCACTTAAAAGAACTTGACAATGAGAGCTCTTGGGCGTTGTTTAGAAAAATGGCATTTTTGAATGAAGA  
AGAAGAGATTGAGAATCAAATAAGGTTAGAATCGGTAAAGATTATAGCAAAGTTGAAAGGTTCTCTCTTACAATAAT  
GAATAGTTGGACTTTGTTTATTTTCAAACACACAGAAATGGATTGGTTGTCATTCAAGGACAACGATCTTGGCACAAT  
TTGCAACAAGAAAATCAAATTCACCAATATTGAAGATAAGTTTCAACCACCTTCCATCTAATTTGAAGCACTGTTTTAC  
ATATTGTGCATTTGTTCCGAAAAGACTATGAGTTTCAAAGGATGGATTGGTAAAGCAATGGATGGCACAAGGTTTCATTC  
AATCACATAGTAATAAAGAAATTTGAAGATGTTGGTGATGATATTTTTAAAGAGTTGTTGGCAGGTCATCTTTTCAAAAT  
GTAAAAGTAATAAATGGGGAGACGTC AAGGAGTGCAAGATGCATGATTTGATACATGATCTTGCATGTTGGATAGTAGA  
AAATGAATGTGTGGATGCAAGTGTATAAACTAAGTCAATTTGATAAAGGACTCGACATGTGTCATTTCCCTCCAATTTAT  
CAAGAAAAGTTGGGAACTTGAAGCAAAATCATTGACTGAGGTAAGAAATTTGAGAACCTTGCATGGTCCCTCCATTTCTT  
CTATCTGAAAATCATTGCGATTACGGTCAATTTGAATTTGGGGTACAGCAAAATTTCAAGAAAATTTCCCAAGTTTCAATGATCA  
GTTAAGACATTTAAGATATCTTGACATTTCTGATCATGATATGAAATTTCTCCCAAGTTTATTACGAAATTTGATAATC  
TGAAACACTTATCTTCTGACTGCAGTATTAAGAGAATTGCCAACCGATATTAACAATTTGATAAATCTTAAGCAT  
CTTGATGTACATGGTTGCTACCGTTTGTACATGCCAAAAGGACTGGGTGGGTTGACTAGCCTTCAAACGATGAATTT  
GTTTGTATTAGGGAAGGATAAGGGTTGTGATTTAAGTGAGTTGAATGAACCTTGCTAGGTTAAGAGGATCCTTGGCTATTA  
AAGGATTAGAATTTGTACCCTACTGATTTGAAAAATGCTAAATATATGGAAGAGAAATTTGGAATTCAGAAGCTGAAA  
CTACGTTGGAAATAGGATCTGTACGACGCTGAAACTGATGCATCAGAAAACGATGATGAGAGATTCTAGACTGCTT  
AAAACACATTTCAAATGTCCACAAAATGCAGATAAGAGGATATAGAGGAGTAAAGTTGTGTAATTTGGCTATCTTTTGATT  
ATTTAGGCGGTTTGGTCAACATAGAGCTTCAAAGTTGTGAAAAGTTGCAGCATCTCCCTCAATTTGATCAATTTCTTTT  
CTCAAGCATCTTCTTCTTGAACCTTACCCAGTATTGAGTACATTGATAATAACAATTTCTTCTTCTTCACTTTCTT  
TCCATCCCTTGAAGACTAACCATCATGACAATGCCTAATTGAAAGGATGGTGGAAAGGGGGAAACCCCCCGGAATCTG  
CTCGTTACAGTGCCTTGTTCACCAATATTACATCACCTTTCTCGATTAGATATTTCTAATTTGTCTCAGTTGGCTTCT

ATTCCACAGCATCCACCTTTGCGATCATTAGCATTGAATGATGTTAGTGTGCAACTTTTTGATATGGTAATAAAAAATGGC  
TACAACCCCTGCTGCTGATTCTTCTTCAGCTTTGTCTAAAATTATCTATTCTTCACATTTCAGAATATTGATCTTGAGTTTC  
TGCCAGAGGAGTTGTTTGGTAGTACGACAGATCTTGAGATTTTTACCGTAGAGTTGAAATATATGACAACCTCTTGAACGT  
TTGGATCTATATAAATGTCTAATATAGTGAGTCTTGAAGGGATTAGCCACCTCACTTCTCTGTCAAGCTTGAGAAATTTG  
TAATTGTAGCAATTTAACTTCGTTGCCAGAAGGGATCAGCCATCTCACTTCACTATCATATTTGACGATTTATTGTGTCA  
ATTTAACTTCGTTGCCAGAAGGAGTCAGCCATCTCACTTCACTATCAAGTTTCACTATTGAGGAATGTCCCTGTTAACT  
TCATTGCCAGAAGGGGTGAGTCACCTCACTTCACTGTCAACTTTGATAATTAGGCGTTGTGTCAATTTAACTTCGTTACC  
CGAAGGGATCGCCATCTCACTTCACTGTCAATTTTCACTATTGAGGAATGTCTCAATTTAACTTCGTTGCCAGAAGGAC  
TTTTACACCTGTCTCTTTCGAGGATCATTGACAGTTTTCAAATGCCCAAGTTATCGAAGACGTGGAAGAAGCTAAAC  
AAGTAG

>Cucs.128130

ATGGCAATTGGTGACCCTCAACTTCTATCTACATCGTGCACCTGTTGATAAAAAGCCATGGCATAAAAAAGCTTAGCTC  
TCATGCTTTAGAATGCCTTGAATGGTATGTGGTCTTAATGATGATCTTAAACAACTAAGGAGCAATGTTTCGTCCATTC  
AATCTGTACTTCGTGATGCAGAGCAACGTCAAATCAAAGGCAATGATCATTCTTTAACCGATTGGCTCGAAAAGTTGGGA  
GACGTTTTTTACGATGTTGAGGACGTTCTTGATGAAATCTCTACTGAGGCTCTCCGTCGAGAAGTGATGACAAGAGGAAA  
AAATGCAAAGCAGGTTAGAACTTCTTCTCAATTTCAACCAACTTGCATTTAACTATAGGATGGCATTGCAAGTCAAGA  
AAATTAATGAGAGCTTGTATTTATTTCCCAAGAAAAGATAAGTTTTCAGCTCAATGGAAATGCTTATCTTGGGATACAA  
AATGTTTTATCTTATCCAATTTGGGATGGAAAGGGATACCTCACTCATCTTTAAGTGGGGATCAGAAAATAATTGGAAGGGA  
TGATGAAATGAACAACCTTAAAAAAAATTTACTAGCAGAGGATGACAAGGTGAAAGCTAACGTTTCATTCATCGCTATTG  
TTGGAATGGGTGGAATTGGCAAGACAACCTTTGGCCAAATCTCTTACAATGACAAACAAGTCTCTGATGGTTTTAGTTCA  
AGAATTTGGATTTGGGTTTCTAATCAATTTGACACAAAAACAATATTGAAAAAGATAATTGAATCAGCAACCGAAAAGAA  
ACCAAAGGTAGAAGAAATGGAACCTTTAAAGACAAAGCTTGAAGAAGTGATTTGGAGGAAAGAAGTATTTGTTAGTTATGG  
ATGATGTATGGAATGAAAATGAAAATGAATGGGAGAATTTGAAAACCTGTTAATGCTTGGTGCAAGAGGGAGTAAGGTT  
TTGATCACAAAGCGTGACAGTAAAGCAGTTCAGGAGTCGAAACAATTTCTCTAAAAGACTTAACTGAAGATTTTTCTTG  
GTTGTTGTTTAAAGAAGTGGCATTAAAGAAAAGTGACTTAGAGTCAATAAATCAAACTTGATAAAAAATGGGAAAAGAAA  
TTTCAAAAAGATGTGGAGGTATTCTCTTGTAAATAAGACACATAGGACGTTTATTATATGGAAAAACTTCCGAGAAGAT  
TGGGAGTTCATCAAAGAAAATGAACCTTTAAATGTCACCTGTAAGAAAAATAATAATGATGGTCATGTGATATCAACATT  
AAAATTGAGCTATAACCATTTGTCACCAAATTTGAAGCAATGTTTTTCTTATTCATCCTTGTTCCTCAAAGGATACAAAA  
TTAGAATGAATGAATTTAGTATGACAAATGGATAGCTCAAGGTTTTATCGAATCATCAAATGGAGGAAAATCTGTAGAGAAT  
ATTTGGGAAGGAGTACTTGGATGAATTTGAGGTTTTCTATGAAATTTCTATTGAGGATGTTCTTTTTGAAAGAAGT  
TGGCATGCATGATTTGATGTGTGATCTTGCAGAGAGGTTAGCTGGACAGAAATTTGATACATACGTGGATATCCAGAGAGTG  
GATATGTTGTGAGTGAACAACTCGTCATATTTCAATTTGAATATGAACCACGATCATGGATTGATGATGTGTCCAAATG  
CAACAAGCTAAAGGATTAAGAACGTTCTTTTTGTTTACGAAAAATCCTTTCTTTACGAGAAAATCCAATTTGAAAAGTTCT  
TTTGGACAGACTGTTTTCTCACTTTCCACGTTTGCAGATATTACAAATCCCTAATGTGTCAAAGTCAATAAAAAAGCTTA  
GACATCTTCGATATCTAGAACTCGGTGAAGATGCGAAATCAGTTCCAAACCTCCATCAGAAAATTTGCAAAAATTTGCAACA  
CTAGATCTAACCAAGTGTATGACCTAAAGGAGTTGCCAAGGATATTACAATTTTGTAAACCTCAGACATCTTCTTTG  
TGATTCAGATTAATGAATATGCTGCAAGGACGATGGAGAAGTTGACTAGTCTACAAACATTAAGTTTCAATTTTTGTTG  
ATTTGAAAAGTTTTGATAAGGTAAGGAAATTCAGTGAGCGGAGTTATTTTTATAGAATTTGACTTAAAAATCAAAGGTTTTG  
GAGCAGTTGAGGTTTTCTCCATCAGACGTCAAATCAGTAAATCTTAAAAACAAAAAGTCCCCTTTTTGAGACTGAAATG  
GAAATTTGAGAATGGTAATGAATATGAAGGTGATGCTGATGATATAGTATTGGAAGGCTTAGAACACATCCATATGTTA  
ATCTCTTGCAAATTTGAAGGTATTGTGGAGTAGGATTACCAATTTGGGTGCCACCTCAATTTTGTAAAGGGGAATTCGA  
ATTTGGTAATTTGTGATAGATTACATCTGAATCAACTCTCCATCTTCATGCTCTTGAATTTCTAAATTTAGAGGGTTTTAA  
ATCTGCTCATGAGTATGCAATGGATGGATTGGCACCCTTACTCTCTTGTATCTTTGAAAATAGAAGAATGTCCAAAATTA  
AATCACTTCCAAAGGAAATGCAACAGCTCAAATTTGTTGTCAACTTAAACATAATCAAGTCCCACAACCTTGGGGAGAGA  
TGCAAGGAGGGAGGAGGATTGGCCTAACATTTCCCATATCTCTGACGTTCTTATTGATTGA

>Cucs.128140

ATGGCTGAAGCTATTCTCTACAACGTTACTGCAGACATCATATTTCAAATTTGGGCTCTTCCGCACTACAGGAGCTTGGGTT  
GTTGTGGGGTGTCAATGATGAACTCGACAACTCAAACACTCGCTTTCTGCCATTCAAGCTGTGCTTCTCGATGCGGAGG  
AGCAGCAGTCCAAGAGCCTTGCTGTCAAGCTTTGGTTTCAAGGCTTAAGGATGCTTTGTACGAGATGATGACCTGGTG  
GACGAGTCTCTACGAAAACCTTAAGAAGGCAGGTTTTGGCCAAAGATCAGAGAAAAAGAAAACCTAGTACGTATCCTCTT  
TTCCAAATTTAAATCTAATTTGAAAATAGATCACAATCAAGGATATTAGACAGAGGCTACAATCTATTAATGATGACA  
AAAATCAATTTAGCTTTTCTGAGCATGTGATCGAGAAAAGAGATGATGAAGAGTTGAGAAAAGAGACGGGAGACTTACTCT  
TACATACTTGAAGAGGAAGTATCGGTAGGAATGATGACAAGGAAGTAGTCATAGATCTTCTATTAATTTCCAACATCAC  
AGAGGATATTGCAATTTGTTCCATTGTTGGAATGGGAGGACTGGGAAAGACTGCCCTTGCTCAGTCTATTTATACCCATC  
ACAATATGACTAATAGTGGGTTTGAATGAAGTTATGGGTGTGTGTTTCTGAAGAATTTGATCTAAAAGTTATTATCCAA  
AAGATGATAGAGTCTGCAACTGGGACGAAGCCTAAGCCTTACTTCAAATAGATTATTACAAAGTGAGCTTAGAAAAGAA  
AATCGATGGAAAAGAAATACTTATTGTAATGGATGATGTGGAATGAGAAAAAGAGGAATGGTTACGCCCTTAAAAGAT  
TATTGATGGGCGGTGCAAGGGTAGTAGGATTTTGTATCACAACACGGAGTGAACAAGTTGCTAAAACCTTTGACTCTACT  
TTCATCCATTTTTTACAATTTTGGATGAGTACAATTCCTGGTTATTGTTTCAAAAAATTTACTTGTGTTGGAAGGACATCC  
AAGTAATCCAGAGAAGCTTGTCAAGTTCAAGTTTGATACAAATTTGGCAGGGAAATCGTTTCAAAGCTAAAAGGTGTTCT  
CTCTCACGATAAGAACCATCGGAGGACTTTTAAAAGACAAATAAATCAAAAAGAGTTTGGTTGTCTTTCAAAGATAATGAA

CTTCATCGAATTTTGGGGCAAGGACAAGATAATCTAAAAGAAGTGCATTAAATCTTGAACCTCAGCTATAAATACCTTCC  
AGCTAATTTGAAGCAATGTTTCCTATACTGTGCTTTGTTCCCGAAAAGATTATGAAATTTAAAACACATGAACTTATACTAA  
TGTGGAGTGCAGCAAGGTTTCATTCAACCAAAATGGCAGCAAGGACAACAGCCTCATTGATATTGGCAATGATTATTTTCATG  
GAGTTATTATCAGCATCATTTTTTCAAGAGGTTACAAAAAATGAACGGGGAGACATAATAGCATGTAAGATGCATGATTT  
GATGCATGATCTTGTCTTGTGGATAGCAGATAATGAATGCAATGTGCATCAACATAGGAACTCGTCACTTTGCATGGAAAG  
ATCAATATTTCTCATAAAGATCAACTTCTAAGATCATTATCAAAGGTGACAAAATTTGAGAACATTTTTTCATGCTAGATTCT  
GCAAATGATTTGAAATGGGAATTTACAAAAATACCTTCATGATCATTGCAATTACGAGCCTTGTATTTCAAAAAATTTGAA  
GAATGCAATGATCGTTTTGGAGTTTACTGGTAAGTTGAAACATTTGAGATATTTGAGTATTTGAGTATTTGAGTATTTGAGT  
ATCTTCCAGATTCATTACAGAATTGTATAATTTAGAAACACTGATCCTTCGGAATTCAGTTTTAAAAATGTTGCCCGAT  
AATATCGGCAATTTGATCAACCTCAAGCATTAGATCTTTCTAATAATCGAAAATTTAAAAATCCTGCCAGATTTCTATTAG  
TGACTTGTGTAATTTGGAAGAACTCATCCTTCATGGTTGTTGAGATTAGAAGAATTTCCAGAAGATACAAAAAGTTGA  
TCAACCTTAAAGCATCTTAATGAGAAACACGCAGATGCTCTGTGAGGGACAAAAGAAAAGGGATTTAATGAAGATTGTGT  
AGTTAATCAAGGCTGTGAAAAAGACTTCCATTCTGTACACAAGTGTAAAGCTCTTCTTTGTTTTCAGTCTTTTCCCTTAT  
G

>Cucs.132370

ATGGGTGACCTACTGACTTTTTGGTGTGCAAGAACTTTGAAGCAGGCTGTAACCTTGTAGCCAAAAAATTTATTGCGTC  
AAGTGAATTTAAGGTGGTGTGCTAGAAGAGCTGAAAGATGATCTACTTCATGCTGAATGGATCCTCCATGCCATAAAAAACAA  
AGCATGATCAATCACTCAATGACAAAATAACTCATTGGGTGAATGATCTTCAACTTATTGTTTATGAAGCTGAGGATATG  
TTAGACTTGTTTGCTTATGACGATGTTGAACGAAAAATAAGATCAAACAAGGTATTTCCCTAATTCCTTATGCACCATAAA  
ACCCATGCTTGATTGTTTTCTTTGGTGTCTTTGTACATCTTGACAATACAACCCGAAAAATAGAGAGTGAAGTTGAGC  
AGGTTGAAGAGACAACCTTCACTGCTTGAATAATATGTGGTGGGAAGGGAGATGGAAGTTGAAAGCATAGTTCAAGATGTG  
ACTGAGGCTAGTCAACAACAACCTCAATTCATTTTTACCCGTTTATGGAACGGGTGGATCAGGAAAAACCACTTTGGCCCA  
GTTGGTGTTTAATGACGAGAGGATTTGAAAAACAATTCATCATACTGTTTGGGTATGTGTCTCAACCTTTTGTGCATCA  
ACGAGATCTTGCAGTCAATCTTGA AAAAGGTAAAGCAAAAGCAATGATAAATCGTAGCAAGGATGATAAGGACACCTTAATT  
CGCAATCTTAAAGAAGTGATGGGTGAAAAAGATATTTTCTTGTGCTTGACAATGTTTGGAAATGAAAACAAAAATTTCTG  
GGAGAAGTTGAAGGAATGCTAATGAGTATGTTGAAGAAATAGGAAGCAGTGTCTTGTACGACCAGGAGTCGTA AAA  
TTGCAGAAATGATGAAAGAAACACTTGACACCTATCATTTAAACAAATTAAGTATGATCAATGTTGGTCAAGTATTTAGC  
TACTTTGCCAAGGCGAATGCAGTACCAATAACTTCCAATTTGGAGCTTGTGCGAGAAGAGTTAAGCGTGGATCGTCTACC  
AAAAGCTTCAATAAAGCAATGCTTTGCTTACTGTTCAAATTTTCTTAAAGGTTATTGGTTGACAAAAACAAGTATCA  
AAATGTGGATGGCACCGGTTTACTCGACCAGATGAAGGAAATAATGAAACAATGGAGGATACAGGAGAGAGGACTCTC  
AATATCTTATGCTTATTGCTTATTTCAAGATGCTGATGATGACAAAATGGCATATTGGTAGGAAGTTTCGTATGCTATGA  
TCTTATACACGATATTGCTTGTGATGTTTCAAGCGATAAAAAGGTTGCAATTAGATCATAGCAGTTTATCAAAGTGAAAG  
GTTTGACAGAAAGAAAAAATTTGAGAGCAAGTTCGCTACGGTAATAGATTTCCGGGAGGAATGGTAAGATTAAGAT  
TTTGTGTGTTTGCCTGTTTTGACAATTCAGAAAATGTTGCTGAGTTACCAAACCTCAATTTCTAAGTTGAAACATCTTAG  
ATATCTAGACATTTACGTTGTTATTCAATAAAGAAGCTTCCAGAATCTATTGTTGGGCAATTTGAAATTTCTATTAATGG  
GTATTGATTTACCCCTAAATTTGAAATGCCTCCATATTTGAGCGAATTTGGTTCAACTTCAAACGTTGTTGCTTTTGCA  
GTAGGATTTGAGACGGTCTAAGATTTCTGAACCTTAGGGTCTTTAGAAAATTTGAAAGGTTGTTGAAAGCTTCACTCGTTT  
AGAACATGTTGAAAGTAAAGGAAAGCAAGGCTGCAAAAATTTGGTGGAAAAAGAGAAGGTAGAAGGACTTAAACTTGTCTGT  
GGCGTGGAAAGTGAAGAATAGACTTGAACCACACAAAAATCTTAAAGATTTGAAATCCAATCCTTTTTAGGTGGGTGT  
TTTCCGAAGGAGACTTTTGTGAGAATTTAGTAACAATAACTCTACATAAAATGTGGAATTTGTAAGGCTTCCAATGCT  
TGGGCAATTAAGCAAGCTAGAGGCACTTATAATATATCAAACCTTTCCAAAAGTAAAGAGTATAGGCAATGAATTTCTATG  
GAAATATAATGACGGCCAAAGCAAGAGTAGTGTAGTATTTCCCAAGTTGAAGGAATTTTATGTTATTGCGATGTACAGC  
CTAGTTGAATGGGAAGAAGTGGTAATAATGTTAAAGCTTTTCTCGTCTTGAATGCTGCATATTGTTAAATGTACAAA  
ATTAACATCAGCATTAAAAAATGCTTTTTCTTTTAAATTAATTTGATCATTCTATTAGTTACTTAAATTTGCTTTCCAA  
ATTCACTCAAAATCTTATTGCTTGTGCTTATTTCAAGATGTTGAAGATGAAAGTGAGATAGGTGAGAAGTTTCTTATG  
CATGATCTTATACATGATATTGCTTGTCTGTTTCAAATGATGAAAAATGGCATCGGATCATAGCCTTTTATCAATGAG  
GAAACATTTGGACGAACGATGATAAAATAGTTGCGAGCAAGCTACGTACGAATATAGTGAAGAATGAGAATGATTTTGAAG  
TGTTGGAAGGACTTGAACAACACAATAATCTGAAATATTTGAAATCGAATCCTTTTTCAGGTGGGCAGTTTCCCAACCAG  
ATTTTTGTTGAAAAATTTAGTAAAAATAACTCTAATTTGAATGTGGAACCTGTGAAAAGCTTCCAATGCTTGGGCAATTAAC  
CAAGTACTAGAAATACTTGTATTTTTCGATTACGAAAAGTAGAGAGTATAGGCAATGAGTTCTATGGAAACCAAGGC  
GTAGTAGTAGTGTATTTCCCAAGTTGAAGGAATTTTATGTTGATGAGATGGACAGCCTAGTTGAATGGGAAGAAGCT  
GTGTCAAATATAATGTTAAAGCTTTTCCACGACTTGAATGTTTGCATATTTTTCATGCAAGAAATTTTGA AAAATTTCC  
AGATACAAAGGTTCAAATTTGTGGTCTTTTGTACTACAACCTACAAGAGGAGGCCCTTGGCTCATTGCTATTCCAACG  
TCCGATCATTTTTTTTTGAAAGAAGACACGGGTCTTTCATGA

>Cucs.133510

ATGGCGGGAGCTTTAATTTGGTGGCGGGCATTTGGGTGTTCCGTTTAAACGAGCTAGCGACCCTCTTGAAGAAATTTGGCGA  
GAGGGCGTGGAGTTTCAATCTGTTTCTTAAACGAGACCGAATCCAAGGTAATGATATAATTCCTCTGGTTAAAGAAATAG  
ATGGTCTTAATGAATCCCTGGATTATCCAAGAGAAGAAACGGAGAAGTTGAAAAACTTATTAGAATATGCTGGAAAGCTA  
CTTAGACGGTGTTTAAGAGTGGGAAGGCTGATTTGATAAGGAAATCAAGTCATACAGAGAAGCTTCGTGAACTGAATGC  
CAGAATCAAAGTTTTAGTACGTTGTGTTTCCAAACCTCTAGAGACGGGAAGAAGACATTGAGTTTATGACTGAGTA  
TCAAGGAAGTCGTTGCGAGGCTTGATAGCAAATCTGGATTAAGCAATCCGGTGGATTTAGTTGTGACGGTTCCTGTGATT

TCAGAAGAAAGTGTGGGTTGGAAAAGCCTGTTGAGAAATGAAGGCCAAACTATTTAGAGATGGGGTTCGATTGTTGGT  
AGTGACAGCTCCCGGAGGTTGTGGAAAAGCACTCTGGCCGAAATTTTTTGTACAGACAAGCAAGTTAAAAATAAATTT  
AGAGAAACATCTTGTTCCTCGTTGTCTCAAGCAAACAGAAACGAAACGCATCTTAATATCTATAATCAAAGACTCGGG  
GGCCTATAGAATCTGGTTCTGTAAGTGATGATGAGGCATCCGGTTGTTAGAAGTTCGGGTGGGGAAATGAGTCCAAA  
TCCTGTATTGATTGTGTTGGACGATGCTGGGACGGTTCTGAATCAAACAAGCTTCTTGAAAAGTTCTCCCGATTACCCA  
ACTGCAAAGTTTTGGTCACTTCTAGATTTAAGTTTCTGCATTTGGTGAGTCGTATGATTTGGAACCTCTGGACCATAAG  
GATGCAATGGAGTTGTTTCGTCGCTGGGCATCGAGGGTAACAGAGTGTACAGTTCCCAGATGAAAGAATTTAGAAAA  
GATAGTGAGGGGTTGTAAGAGATTCCCACTGCTCTGAAAGTGATTGCAGGATCACTTTCGGGTAGAGCCACTTCGGTTT  
GGGAAGTTACGGGGAGGAAATATCTAGAGGAGATTCTATCTGGGTTCTGAGAAAGAGCTTCAGAAGTGCCTCAAAGAC  
ACCTTAGATGCAATCCCAGATGACAAGATAGTTCTCAAGGAGTGTTCATGGACTTAGGTTTCTTGAAGATCAAAG  
AATCTGTCGGCTACCTTCACTGACATTTGTCAGTTGTGATGATGAATGTGAAACAATGTCAAACCTTGATG  
AGCTCTTCCCGGACTTTAGTTAACACTGTCTCTTTGAGAAATAAAGCCGATGAAGATGATTACTACAGCAGTCCCTAT  
ATTACACAGCATGACGTACTTAGAGAATGGCTGTCTTTTGACTAATGAGCAGCCAGTAGACCAAAGAACAAGATTGCT  
TGTGGATATTAACAAAAATGAATTTCCCAAATGGTGGTCTGTAAGACAGATGCAACCTGTGAAAGCCCGCTTTTGTCCA  
TAACAACAGATGAGAAGTTCTCATCATGTTGGCCTGATATGGAAGCACCTGAAGTTGAGGTGTTAATTTCAAATCCTGGG  
TCAGAACTTACAAGTTACCTGATTTTGCAAAGAAAATGAACAGATTGAAAGCGCTGATAGTCAGGAATTACAGGTCCTT  
TCCAATGAATGACAAGTATTCAATTAATCAATTTGTTGTCAAGGCTAGAAAGAATCAGTCTTGAGCGGATTTCAA  
TATCTCTTTTCACTGACCAGCACTGAAGCCCTGTGGCATCTTAAGAAGCTATCGTTCTTTATGTGCAAATGACAA  
GCTTTTACAGACTGCTCAACTCAGATCTCATACATGTTGCCTAACTTACTTGAGATCTCCATAGATTTTTGCAACGATTT  
GGTGGCTTTCCCTGTCCGACTATGTGAAGTTGTACATTTGGAGAACTGAGCATTACAACTGTGCATGCATTTCTTCGT  
TACCCGAGGAAATTTGGGAGTTGATTAATCTAAAATTTCAAGGCTTAGATCTTGTATTCATTTGGAGAAGTTGCCAGAA  
TCAATCTCAAGGCTCCGGGAATTAGTTTTATCTTGACATATCTCATTGTGTGGCCTTACCAAACCTCCAGATAAGATTGG  
CAACTTGCAGAAGTTGGAAAAGCTTAATATGTGGAGTTGCCCGAACATGCGCAAGCTTCCAAAATCAGTAGGAAATCTAA  
AAAATTTGAAGGAAGTAGTTGTGAAAGCGAGATGAAAATATGGGTGAATTTTGTGCGACCTCGGCTTGGAATGTGGTA  
AAAGAACACAAGGAAGAAATCAACTTGGATTTTCTAAATTTGA

>Cucs.155730

ATGGCCATTTCTACAAACCACTCCACTCTCGTCTCGGCATCTATGGCATGAGCGGCATTGGCAAACCACTCTCTCTAA  
AGCACTCTTCAACCACCTTCTCCACTTCTTCAATTTCTAGATCTTTTTCTCCCAACATCAACTCCCTCTCTACCTCCTCTC  
CCGACGGTCTCCTTCGACTCCAACAACTCTCCTCTCCGATCTCCTCATCGCCACAACCTCCGCTCTCGTTCTCAACC  
ACCACGCATCCACCGTCTGTTCCGGATGCAGGAAAGACTCCAAAACAAAAGGCTTTGGTAGTCTCTCGACGACCTGGATCG  
TATCGAACAAAGCAATGCACTAGCAATACCGGACCGAAGATGGTTTGGAGACGGAAGCCGAATCATAATCACAACACGAA  
ACAAACAAATTTGGACACTCTAAAAGTCGACGAAGTTTACAACATGGAATCCAATCTACTGAACGACGAGGAATCGTTG  
GAGCTTTTTAGCTACCACGCATTCCGGGAGCAAAATCCACCAGAGGAGCTTTTGAATGTTCGAAATCCATCGTTTCGTA  
CTGCGGAAGCCTTCTCTAGCTCTGGAATCCTGGGTGGTTCATTCTTCGGAGGGAGACCAGATGGAGGAATGGAGATCAG  
CGATGGAGAGATTGAAGAGGATTCCGGCGTGGGATTTGCAAGAGAAGCTTCGAATAGGGTTTGAAGGATTGAGAGATGAG  
ATGGAGAGGGAGATATTTCTGATGTGTGTTGCTATTTTGGGAATGAAAGAGGAATGGTAGTGAAGATTTAGGATGG  
ATGTGGAATGTATGGAGAAAGTGGATTGAGAGGGTTGAAATGGAGGTTGTTGGTGGTGTGAGTTTGGAGTGGGAGGT  
TGAAGATGCATGATTTGGTTAGGGACATGGGAGGGAGATTGTGAGGCAACATGTGTGAAGGAACCTGCTAGACGGTCC  
AGGGTTTGGCTTTATCATGAGGCTCTCAAAATCTTACTCCATCAGAACGGAAGTGAAAACATTGAAGGACTTGCAATAGA  
CATGGGTAAAGGAAATAACAAGGAGAAATTCAGATTGGAAGCATTGGGAAAATGAGAAATCTAAGGTTACTCAAACCTCA  
ACTATGTGCATCTCATTGGAAGTAATTTTGGACATATAATAAGCAAAGAATTAAGGTGGATTTGTTGGCATGGATTCCCT  
TTGAAGTCTATTTCAAGCTCATTATCAAGGAAACCTTGTGTCATTGACATGAGATATAGCAGCTTGATACACCCTTG  
GACTTGGAGGGATTACAGATCTTTGAGAAATCTAAAAGTTCTAAACCTAAGCCACTTGAAAAGCTAAAGAAGTCCCCAA  
ACTTCAAAAAGCTCCCAAACCTAGAGCAGCTAAAAGTTGAAATGCAAGATGACAGCCTTATCAAGCCTCCACCCCTCCATGGT  
CAACTTTGTAAGCTTCTATCTCAACCTCCAAAACCTGTACAAATCTCTCGTCTTTACCAACCTCCATCTACAACCTCCA  
CTCCCTCCAAACTTTTATCATCTCTGGCTGCTCCAAGATCCACTGCCTCCACGACGACCTCGGTACCTTGAGTCCCTCA  
CCACCCTTCTCGTGACCAGCCGATATCCACATCTCTTCTCCATTGTCAAGTTGAAGAACTCACTGACTTGTCT  
CTATGTGGTTGTAAGTGCAGATCAGGATCGGGAAGCTCGGCATCGCTGCCATGGAGGCTGGTTTCTATGGGCATTGCCAAG  
ACCAAACCAACAGTCACAGCCCTAATCTTCCATCTTCAATACAAGTTTGGAGTCTCTAACAGAGTTGAGTCTACAAA  
ATTGCAATCTCGAGTCACTTCCAATGACATTTGGGAGCTTGAAGTGAATGAAAGAGTTGAATCTTGGAGCAACAAAAAT  
TTGAGGGTTTTGGGGACTGAACTTTGTGGACTTTTGAACCTGAATGAGCTGAATGTGGAGAATTGTGGGAGGCTTGAGTT  
CATCCAAGAATTTCAAAGAATATGAGAAGTTTTTGTGCTACCAATTTAAGTCAATGGTGGAGAACTCTGATGTTTCCA  
TGTTTGAAGAGCACCTAATATGATTCTACCAATTTGTGCTGATTGCTTGGAGTTTGTGGATTGGACAAATTTGGAGTGC  
TCTACTAATATTCGATGGCCGGTTGTTGCAATCTCTCTACTGACTTTAGGATGAGCCTTCTTGGAGTTTTTCTTCCCT  
TTATCTGTTGTTAAATTAACAAATTTGGTTTTGCAGTTTTTCACTTATATATAGTATCAATTTAG

>Cucs.163670

ATGATACCACAGAAATCTTATCACTTTTTCATAACCTCTGTCTATGAGTATTTGACAAATATTGCAACCAAATTTGGGTT  
TTTAGCACTCCAAGACCTTGGATTGCTGTGGACCGGTATCCATGAGGAGATTGACAAACTCAGAGACACTCTTTCGCCCA  
TCCAAGCAGTACTTACGACGCAGAACAGAGCAGTACAAGATTCTGCTGTGAAGGAATGGGTTTTCAAGGCTAAAAGAT  
GCTTTCTATGATATGGATGATTTGATGGATGAGTTCTCCTATGAATCCTTTCAAAGACAGGTTATGACCAAACATAGAAC  
CAACAACCTGTACCAAACAAGTATGATTTTCTTCTCAAAATCTAATCAAATTAGATTTGTTGAAAATGGTTCATAAAA

TAAAAAAGATCAGGGAGAACTCGATACTATTGATAAGGATAAACTCAATTCATCTTTTTGATAATACAAGGGAGATA  
CGAAATGATGAAATGACAAAACGATCAGAGACTTGCTCTTTATACTTGAAGGAGAAGTAATTGGTCGAGATGATGACAA  
GAAATGTATTGTACATTTTCTATTGGATACCAACATTATTGCAAAGGAAAAATATTGTTGTGGTTGCCATTATTGGAATGG  
GAGGATTAGGAAAGACTGCCCTTGCTCAATCTATCTACGGCGATATGAAGGAAAATAACATTTGAATTGACAATGTGG  
GTGTGATTTTCTGAAGAATTTGATGTCAAAGTAATTGTTGAAAAGATCATAGAATCTCTCACAAAAAGAGACCTAAGCC  
CAACCTTACACTCGATACCTTACAAAGTATGCTACGAGAGAAAATTGATGGAAAAAATACTTGCTTGTCTATGGATGATG  
TGTGGAACGATGAACGGACGAAATGGATTAATCTAAAAAAATTTCTTATGGGTGGAGCTAAGGGAAGTAGGATTTTGATC  
ACAACCTCGTACCCATCAAGTTGCACATATTTTGGACACAGATTTGTTCCATGATTTAAGTGAAGTGAAGTGAAGTGAAGT  
TTGGGAGTTGTTAGAAAAATGGCATTTCACCAACGAATCAGAGATGCTTGAAGAATCAAAGTTGGTCGGGATCGGTAAGG  
AGATTGTGACAAAAGTTGAAAGGTTCTCCTCTTGCAATAAGAGTAATTGGAAGCTATCTGTATTCTAAAAAGTCAGAAAAG  
GATTGGTTGTCATTTCAAGGAGAACGAACCTGACACAATCATGCAACAGGAAAATGAGATTCATCCATACTAAAGATTAG  
TTTTAACCCACTCTCATCCAGTTTGAAGCAATGTATCACAATTGTTGCTTGTTCCTTAAAGATTTGAGATTGATAAAG  
ATGATTTGATAAAAACATGGATGGGAGAAGGCTTCATTCAACCACATAATAAGAAGGCAATGGAAGATGTTGGTGATGAA  
TATTTCAAAGAACTCTTGGGAAGATCATTTCCTCAAGACATAAGTAAAAACCAACTGGGAGAGATCATGAAGTTCAAGAT  
GCACGACTTATGCATGATCTTGCATGTTTTGTTGGAGAAAATGATTATGTTTGGTACTGATGACACTAAGTTCATTG  
ACAAAAGGACTCGACATTTGTCAATTTCCGCTTCATCTCAAAGACAAGATGGGAAGTCAATAAAGAATCATTAATAGCG  
GCAAAAGAATTTGAGAACATTTGAACATGCTTGTCACAATTAATGATGGTGATGAAATCGAAATCGACTTCTAATCATT  
GCGGTTACGACATTTCAAGGAACTTAAATATTTTCTACTCATTTCCCAAGTGTATTTGGTAAGATGAAACATTTAGATATTA  
ATTTTACTCGTGTTATTTTGAATTTTCTTCCCAAGGTAGTTACAAAATTTGACCATTTGGAAACATTTAGATCTTTCTGTA  
TGTTTCAAGCTAAGAGAAGTCCCAAGTATATACGAATTTGATCAATCTCAGGCATCTTGGTATTAACCTTTAATTGA  
AGGTTTAAAGTTATATGCCAAAAGGAATGGGTTCAATGACTACCTTCAAACAATGAATTTGTTTATATTGGGAGAGAATG  
AAGGTGGTGAGTTAAGTGAAGTAAATGGATGATTAACCTTGAAGGATCATAAAGTATTAACAATTCGAGTTCTGCAAA  
CCCATTGGTATAGAAAATGCTAAACACCTTGAAGAAAAGTCTGGAATTCAAAAGTTAAAATTTATATTGGTATCTCTTGG  
AAGGAAATATGAAATGATGATGAAGATGAGAAAAGTTTGAAGTGTGAAACCACATCCAAATCTTCAGAAAATAGTCA  
TAAATGGATACGGTGGAGTGAAGCTATGTAATTTGGTTCTCATTGATTATATTGTCAATTTGGTCATTATAGACCTTTTC  
AACTGTAATAAATGCAACAGCTCCCTCGATTTGATCAATTTCTTTTCTCAAACATCTTAAGCTCCAATATTTACCAA  
TGTTGAGTTTATTGATAATAACGATTTCTGTTCTTCTCGTTAACAACCTTTCTTTCCCTCCCTTGAGAACTGAGAATCT  
TTAGGTTACCTAAGTTGAAAGAATGGTGGAGAGGAACTCATCGATCAAATTTCCACAACATAGACGTTTGGAAATCA  
TTGAACATAAGTGGTGTAGTTTGAAGTTTTTGAGTTGGTAATGGAAATGGCTACTACAAAACATTTATTTGGATCACA  
GGATTTCTTCTTCAACTACATCTATATCATTATCTTTTCTAAGTATTTGAAGACATTTGATTTTGGATTTTACAATCTC  
ATGACTTATTTCCAATATGACACATCTTAAAGTCTTTTGGATAATAAATTTGCAAGAATATAAAAAATGCTTCTTCTCTT  
GATGCTGTGACATGGAAAGGACTTGAAGTCTTCTGTAAGTCTTATGTTGTTGTTGTTGTTGTTGTTGTTGTTGTTGTTG  
GAGTTTGAATGTGTGACAACCTTCAAAGTTTGAACAATATAAATTTGTTGTTGTTGTTGTTGTTGTTGTTGTTGTTGTTG  
ATCTCACCACTTCACTATCAGTATTGAAATTCATGGTTGCTTAATATAACTTTCTACCCTCACGAAATGAGTCAACTC  
GCTTCACTAGCTATCACATTTGAGAATCGTGGTTGGTTCGATAAATATGATCCAGGTGAAGGAAGGAAAGAAGATGACGA  
TCAGAAACAATTTGGAAGAGATGAACAACATGAAGGAACGACTCATTGA

>Cucs.178360

ATGGAGTTGTGTGCCGGTGCCATTGTTAATCCAATCGCAGAAAAATCGCCAACCTGCACGGTGGATCCGGTTTTCCGGCA  
ACTAGATTATTTGCTCCACTTAAACCAATGTGAATGATCTCAAAGATCAAGGCAAGAAGCTGGTGGAAACCAGAGATT  
TTGTTCAACATCTGTGACTCCGCCAAAACCAATGGGTACGAGATCGAAGTTATGGTCACTGAATGGTTGGGATAGCT  
GATCAATTTAGTGAAGATGTCGATAGGTTTTTCAACGAAGCCGACGGCCGAAGTCTTCGATGGTGGAAATATGCTATCACG  
CCATCGATTTAGTAGAAGAGCTACCAATTTGGCTGTGGCAGTTGATAAAGCCATTCAAGGTGGGAGTTTCGAGAGAGTTG  
GGTTCGGGTGTAATCCACAAGAAATTTATGACGCTAAGGACAATAAGAAGTTCGAAGCCTTTGAATCTAGGGTTTGGATT  
CTGAAGGAGATAAATGAAGCGGTTGGCGATGCTAATGCGAGGGTGATTGTTGGTACATGGGATGGCGGGATTTGGGAAAC  
CACCTAGTTGAAGAAATGCAAGATTGGCCAAGGAGGGGAGCTTTTTGATGCTATAGCAATGGTACTGTAAAGCAC  
TTCAAACATTAAGAAAATACAGGGGGAGATTGCTGATCAATTTGGGTTGAAATTTGAAGAGGAAAAGGAAACGAATTAGG  
GCCGATCGACTACGTCGAAGTTAGAGATGGAGAAGAAGTGTAGTGGTTTTGGATGATGTTTGGAGTAGCTTGATTT  
GGAAGCTGTTGGAATTTCTAGCCATCACAGGGATGTAAGATACTTGTAACTTCTAGAAAAGGATGATTTGTTTTTCAATG  
ATTTTGGTACTCAGAAAAATATATATCAATATCTGTCAAAGAAAGGCTAGGGATTTTTTCAAACAGGTGGCATGT  
GATCTGTTGAATCTTCTGATGATACTGATCCTGAAATGGAAGCTGTTGCTACTGAATGGCAGATGAATGGAGGAT  
GCCATTTCTCTTGCAACTGTTGGACAAGCCTTGAAGGTAAGGGCTTCAAAGTTGGAATGATGCCTTGAAGGAATGA  
AGTTTCTGGCGAACCCAGTAACTATGGGGTGAATAAAGTGGCATAATTTGTTCTGAAAGTGAGTTATAGATCTCTAAAC  
AGAGAAGAAGCCAGATCACTATTTACTATGTAGCTTGTTCAGAAAGATATCAAATTAACATCAAATACTTGTGAT  
GTATGCCATGGGTTTGGGTTATTAACGCCATGAGTTCTTAGCAATGGCAAAATGGAGAATACTTTCTTTGGTTGATG  
AGCTCAAACCTTCTCACTTGTGTTGATGGGGTTGATAACGATTTGTGAAAATGCACGATATAGTTTCGAGATACAGCA  
ATTTTGATTTGGCTCGAAAATGAAGTCCAAGTATTTGGTTAGACATGGTGTGGAGAGAGTTTGTGGCCCCCAATGGATGA  
GTTCAAAGATTACACTGCAATCTCATTAGTTGCGAGTGATCACTCGGAACCTCCAGAATTTATATGTTCCACAGCTTAGAT  
TCTTATTACTGGTAGAAAAGAACAATCTTTGCGATTACCTGAAAAGTTCTTTGCAGGTATGCAGGAACCTACGAGTTTTA  
GATCTCACTGGCTTATGATTCAGCGGCTTCCACCATCAATCGACCAACTGGTAAATCTTCAAACATTTGTGTTAGATGA  
CTGTGTTTTGCGAGACATGTCTGTAGTTGGTGAAGTGAAGGCTTGAATTTCTTAGCTTGAAGCATCTGATATTATTG  
CACTTCTAGAGTAATTTGGGAACTTACCAATTTGAAAATGTTGAATTTGCTGATTTCTAAACTCAAGGTGATCCCT  
GCTAACCTTTTATCTAGGTTGATAGGTTGCTGAGCTATACATGGACAATAGTTTTAAACATTTGGAATGTAGGACAGAT

GGAAGGTTATGTTAATGCAAGGATTTCTGAACTAGACAACCTGCCACGGTTGACCCTTACATGTCCATATTTCCAAATC  
CCACCATTCTACCACATGCCTTTGTCTTTAGAAAATTGAGTGGTTACAGAACTAATTTGGAGATAGATGGGATTGGTCT  
GGCAATTATGAAACTTCAAGGACCTTGAAGCTTGAAGCTTATAGTAGCATTGAGAGAGAGGATGCAATTTCAAGCATTCT  
AGAGAATATTGAAGATCTGTATTTAGATGAATTAGAAAAGTGTCAAGAATATTTCTATTTCAGTCTAGACTATAAAGGCTTTT  
CGAAATTGAAAGGTTTGGCTGTCAAAAACAATGGTGAATTTGTGACTTTGTCAACTCGGATAACATGCATCCACAC  
AGTGCCTTTCCATTGTTGGAGTCCCTTATTTCTGAAAAATCTAGCTGAACTTGAAGCATTGTGCGTGGAAAGCTTCCACA  
AATGTCTTTCCGTAACCTGAAAAGAGTAAAAGTTGAAAGTTGTGACAGATTAATAATTTGTTTTCCCATCTTCTATGGTCA  
GAGGCTTATACATCTTCAAAGCCTGGAGATTAGTGAATGTGGCATCATAGAACTATAGTTTCCGAAAAACAAGAAACA  
GAAATGCAATCAATGGTGATAAGTGGGATGAGAACATGATTTGAGTTTTCTGAATTGCGTCTCTGATACTTCAACATCT  
ACCAGCCCTTATGGGTTTCTATTGTGATGATTTGCATAACTGTGCCTTCAACCAAAGTGGATTACGTCAAAACAGTTTTTA  
CTATTGAACCTAGTTTTCTATCCACTTCTCAGTCAACAGTTTCTTCCCAAATTTGGAGACATTAATAATACAGCTTTG  
AACTCAGGAAAGATTGGCAGATCAACTTCTTCTAGCTTTTATGGCTTTAAAAATCTAACTTCTTTGAGTGGAGGG  
TTGTGCTTCAATAAAATATTTAATGACAATCACTGTGGCTAGAAGCCTTGTGAATCTTGAACGCCTTGAACAAAACGACT  
GTAAGTTGATGAAAGCTATAATCATTTTCCAGAGATCAAGATCTGGACAACAATTACCCTTCCAAATCTATCTTGCAGAAC  
AAGGATGTTTTTGCGAACCTGGAGTCCCTTAAATCTCTCGCATGGATGCTTTGGAGACATTATGGGTCAATGAAGCTGC  
TTCAGGATCCTTTACAAAGCTGAAAAAGTGGACATCAGAACTGCAAAAACTTGGAGACAACTTTCCAAATTACATGC  
TTAACAGAGTGACAAATCTCGAGAGATTAACGTTACAGATTTGAGTTCCCTAGTGGAGATCTTTCAAGTGAAGATCCCA  
GTTAAACAATGGCAACCAAGTAAAGAGACATTGGAGCAACCTTTGAAAGAGTTGAAGCTGCTTCTGCTAACTAACTTTG  
GCACATATGGAGCTCAGATCCACACAATTTTTTACGCTATCCATCTCTCCAACCTGTTTCATACAATTCATTTGTCAAAGCC  
TTTTGAATCTCTTCCCTGTATCCATAGCTAAGGATCTCATAACAATTTGAAGTGTAAAAATACAGTTCTGTGGAGTTGAG  
GAAATTTGTTGCAAAACGAGGAGACGATGGAGATGGAGATGATGCTGCGTCTTTTTGTTGAGTGGTTTTGACATCATTGAC  
TCTTTGGAATTTGTTGAGTTCAAGAGGTTTTATCCTGGGAAATATACTTTGGATTGTCCATCATTGACAGCGCTAGATG  
TACGCCATTGCAAAATCATTTAAGTTGATGGAAGGAACTTTGAAAAATTCGTCATCAATCTCATCCGCTGTTGAAAAGGTA  
TTACATTCTCTCTAA

>Cucs.178450

ATGAATCAAGCAAGTGGGTCATCTTCTTCCCTCACGTTTTAGATGGCATTTCGATGTATTTTTAAGCTTTTCGAGGGGAAGA  
CACTCGATCCAACCTTCACTAGTCTATCTTAATATGGCTTTGCGTCAAAGAGGAATCAACGTTTTTATAGATAACAACTTT  
CAAGGGGTGAAGAAATTTCTGCATCTCTTTTGGAAAGCTATGAAAGGATCCAAGATCTCCATTGTGATAATCTCTGAAAT  
TATGCTTCTTCCAGGTGGTGTGTTGAATGAGCTGGTGAAATCATTATGTGTAACAAATGAGAGGACAAGTGGTTTTTACC  
AATTTTCTACAAGTGGATCCATCTGAAGTAAGAAAACAAGTGGAAAAATTTGGAGAAGAATTTGCCAACTTGAAGTTA  
GATTTCTCGTCGGAGAAGATGCAAGCATGGAGGGAGCCATGATTTCTGTTTCTCATATGTCTGGATGGCCGGTTCTTAAG  
AAAGATGACGAGGCCAATTTGATTCAAAGAATTTGTTCAAGAAGTCTGGAAGAAATTAATCGTGAACAAGAGAGATGCG  
TGTACCTAAATATCCAGTTGGAATAGATAGACAAGTTAATAATATACTCTCCAAGTTATGTCTGATGAAATAATTACTA  
TGGTTGGATTATATGGAATTTGGAGGATTTGGCAAGACAACCTTTGGCCAAAGCTTTATACATAAAATTTGCTGATGACTTT  
GAAGGTTGTTGCTTTTTGATAAATGTTAGAGAAGCTTCAAATCAATATCGGGGCTTGTGAACTCCAAAAGGAGCTACT  
TCGTGAGATTCTAATGGATGATTCAATCAAAGTTAGCAATCTCGATATAGGAATTAGCATCATAAGGGATCGACTATGCT  
CAAGAAGATTCTTTTTGATTCTTTGATGATGTTGATACAGTGAACAACACTAGAAGCATTAGCAGGAGCATGATTGGTTTT  
GGACCGGGAAGTGTGGTCAATTTGCGACAACAAGAAACAACACTACTTGTATTAATGAATTTGATATATGCAAAAGTGT  
TCAGGGATTGAATGATGATGAAGCCTTTCGAGCTTTTTAGCTGGCATGCTTTTAAAGATGAGTTGTCCATCAAGTCATTATT  
TATACCTAATTTCAAACGTCGCGTAAGTTATTGTAAGGCTTCCCTTGGCTTTGGAAGTTGTAGGTTTCACTCTTTAT  
TCTATTGAGCCATCCAAGCTTAAACTTATATTTGGATGAATATGAAAACCAATACCTTGAAGGGCATCCAAGATCCTCT  
TCGAATAAGTTATGATGGACTTGAAGATGAAGTAAAAGAAATTTTTCTTTATATTTCTTGTGCTTTGTAGGAGAAGACA  
TCAACAAAGTTAAAATGAAGTTAGAAGCATGTGGTTGTTTATGTTTGGAAAAAGGAACAACAACAACTGATGAACTATCA  
CTTCTGACCAATTTGATAAATCCAATCGGGTTGAAATGCATAAATTTAATACAACATATGGGTGCGACAATTCATCTTTGAA  
GACTTCTACATCTCATAAAAAGAAAAGATTGTTGATTAAGATGATGCTATGGATGCTTAAATGGGAATAAGGAAGCAA  
AAGGAGTTAAAGCCATAAAATTAAGTTTTCTAAAGCTACGGAGTTGGACATTGATTCAAGAGCTTTTAAAAAGTGAAA  
AATGTGGTAGTACTCGAAGTTGGCAATGTCACATCTTCAAAGGTACTGATCTTGAGTATCTACCTAGTAGCTTAAGGTG  
GATGAATTTGGCCTCATTTTCCCTTTTCCATCTTTGCCTACAACTACACAATGGAGAACCTTATGGAATGAAATTTGCCAT  
ATAGCTCCATCAAACATTTTGAAGAGGATTCATGAGTGGTGAACGGTTGAAGGAAATTTGATCTTAGTGGCTCTGAGTTT  
TTAGTGGAAATTTGCTGATTTATCTACTGCAACAACCTTGAAGTTGAATCTTTTAGGGTGTGAAATTTAGTAAAAGT  
TCATGATTTCTGTGGATCTCTCACTAAGCTTGTTACATTTTCTCTTTCTAGCAATGTTAAGGGCTTTGAGCAGTTTTCCAC  
CCCACCTCAAGTTGAAATCCCTCAAACCTTTGTCAATGGAAAATTTGTAAGATAGATGAATGGTGTCTCAATTTAGCGAA  
GAAATGAAGTCTAGCCTAGAAGAATTTGTTGATTCAATATAGTACTGTAATTAATCAGCTATCTCCAACAATTTGGATATCT  
TACTAGCCTAAAACGTTTTGTTTATCATAGAGTGCATGAAGCTCAAACCTTCCAAAGTACAATTTATCGTTTAAAGGAATC  
TTACTTTTTTAAAGTATAACAATTTGGATTTCTTAGAAAACAAATGGTTTCAATGTTGCCCCGCAATTGAACTGTTGGACTTA  
TCTGAAACAATTTTTGTTAGACTACCTCATGTATTATTAATTTAAATCCTTGAATCTCTTGTACAAATGGAATGCAA  
GTTGCTTGAAGAAATTTCCAAAGGTTCCAAAAGGATGTTGATGATGAATGCTACAGGGTGTATATCATTTAACAGATTTT  
CTGACAACATACCTGACTTCAATATGCTGCGATGATAATGTGGTGCATGATGTTCTTTCTCATGACCTCATGATCTCT  
CGTGATTTCTGTTCAATAAGAATTA

>Cucs.178620

ATGGCTGAAGCTATTCTTCTTCAACCTTACTGCAGACATCATATTTCAAACCTGGGTTCTTCCAGCACTCCGACAGTTTGGATC

TCTACGGGGCGGTGTCAAGGATGATTTTGACAACTCTGGCACTCTCTTTCTGCCATCCAAGCTGTTCTTACGACGCGG  
AGGAGAAGCAGTTCAAGGACCATGCGGTCGAAGTTTGGGTTTCAAGGCTTAAGGATGTTTTGTACGAGATTGATGACTTG  
ATCGACGAGTTCTCTTACCAAACTTTGAGAAGGCAAGTTCTGCGAAGTAACAGAAAACAAGTACGTACCCTCTTCTCCAA  
ATTTATAACTAATTGGAAAAATAGGCCACAAAAATCAAGGAAATCAGTCAGAGGCTACAAAAATTAATGAAGATAAAAATTC  
AATTTAGCTTTTGTAAAGCATGTGATAGAGAGAAGAGATGATGATGATGAAGGGTTGAGAAAAGAGACGGGAGACTCACTCT  
TTTATACTTGAAGATGAAGTATTGGTAGGAATGATGACAAGGAAGCAGTCATAGATCTTCTGCTAAATTTCCAACCCAA  
AGAGGATATTGCAATTGTTTCCATTGTTGGAATGCCAGGATTTGGAAAACTGCCCTTGCCCAATCTATTTATAACCATA  
AGAGGATAATGACTCAATTTAGTTGAAAAATATGGGTGTGTGTTTCTGACGAATTTGATCTGAAAATTACTATCCAAAAG  
ATAATAGAGTCTGCAACCGGGAAGAAGCCTAAATCATTCCCTTCAAATGGATCCATTACAATGTGAGCTTAGAAAAGCAAA  
TGATGGAAAGAAAATTTGATCGTCATGGATGATGTGTGGAATGAGAAAAAGAGAAAATGGTTACATCTGAAAAGATTGT  
TGATGGGGCGGTGCAAAGGTTAGTACAGGATTTTGATCAACAGCAGTGAACAAGTTGCAAAAACCTTTTGACTCTACTTTC  
GTTTACTCTATTACAAAATTTGATGCATCCAATTTCTGGTTATTGTTTTCAAAAAGATGATTGGTTTAGAAGCAATTCAGA  
TAATCAAGAGTTCGAGCTTGATCAAAAAGAAATCAAATTTGATCCAAATCGGCATGGAGATTGTGTCAACGTTAAGAGGTG  
TTCCGCTTTTAATAAGAACCATTGGAGGACTTTTAAAAGATAATAAATCAGAAAAGATTTTGGTTGTCTTTAAGGATAAG  
GAACTTTATCAAGTCTTGGGACGAGGACAAGATGCTCTGAAAAGAAATACAATGTTTTCTTGAGCTTAGTTATAAATATCT  
CCCATCGTCTAACTTGAAACAATGTTTCCATATTGTGCTTTGTTCCCAAGATTATCGAATTAAAAAGGATGAACTTA  
TATTACTATGGAGAGCACAAGGTTTCATTCAACAAAATGGCAACAACGACGACAATAGTTCCCTCGTTGATATTGGTGAA  
GATTTATTTCAAGGATTTATATCAAGGTCGTTTTTTTCAAGAGCTTGAAAAAAATGATTTTGGAGATATAAATCACTGTA  
GATGCATGATTTGATGCACGATCTTGTCTTTCGATAACAAATAATGAATGTGTGCGTGGACTGAAGGGAATGTCATCG  
ACAAAAGAACTCATCACCTTTCTTTTGA AAAAGTTAGTCAAGATCAACTTATGGGATCATTATCTAAGGCAACTCAT  
TTGAGGACACTTTTTAGTCAAGATGTTTCATTCACGATGTAACCTTGAAGAAAACCTTCCACAATATTTTCCAATTGCGAAC  
ATTGCACTTAAACTCGTATGGTCCACCCAAATGTGCAAAGACTTTGGAGTTTATTAATTTCTTCCCGATCTATTACAA  
AATTTGTATAAGTTGGAAGCACTTATACTTGACGGTTGTTCCAATTTGAAAAGAAATGCCAAAAATATACTAAAAGGTTGATC  
AACCTTAAGCGTCTTGTTTTGTACGGATGTTCCGGCTCCTCATATGCCAAAAGGATTAAGTGAGATGACTAATCTTCA  
AACATTGACTACATTTGTATTGGGAAAGAAATATTGGTGGTGAAGTTAAAGGAGTTGGAAGGACTTACTAAAATTAAGGGGAG  
GATTAAGCATTAACATTTGGAATCTTGTACCAGCATTGTTGATCAACAAATGAAGAGTAAGAACAGTAAGTTCTTGCAA  
CTAAAGTCTGGTCTTCAAACCTTGGAGTTACAATGGAAGAACTGAAAATTTGGTGATGATCAGTTGGAGGATGTGATGTA  
CGAAAGTGTTTAGATTGCTTACAACCACATTCAAATCTTAAAGAGATACGATTGATGGATATGGTGGAGTAAATTTAT  
GTAATTTGGGTATCCTCTAATAAGTCCCTTGGTTGTCTTGTCACTACATATCTTTATCGTTGTA AAAAGATTACGACATCTC  
TTCAGATTAGATCAATTTCCATACTCAAGTATCTTACGCTTCAAACCTTACCCAACATCGAGTACATGATTTGTAGACAA  
TGATGATTCAGTTCTTTCATCAACAATTTTCCATACCTAAAAGAAATTTACTATTTCAAAAATGCCTAAGTTGGTGAGCT  
GGTGCAAGGATTTCAACCTCAACCAATCTCCTACATATTGGCATGCACCTAAGTTGAAAACCTTCTGCAAAATTAAGGATTC  
GAGGATGAGTTGAATGTTGTACCCTTGA AAAATTTATGAAAACCTCACCTTTCTATTTCTTCACAATTTGAGTAGAGTGG  
GTACTTGGCCGAGTGTGGCAACATTATATGACATCTCTACAACCTTCTTTGTTAAGCAAAATGCAACAATTTAAAGAGCT  
TGCCGGGTTGGATTGCGAACCTTACCTCTCTTACAATTTGAATATTTCTTATTGCGAAAAGCTAGCTTTTCTACCAGAA  
GGGATTCACACGTCATAATTTACAATCGATAGCAGTTGTTGATTGTCTTATATTGAAAAGAAATGGTGCAAGAAAAACAG  
ACGAGAAGATTGGCCTAAGATCAAGTACTATATTTCCGAACATATTTGGGAGAAATTTGTAGCCTCACAGGTTCTTGGT  
CATCTAGAAAACAAGATTTTTCTGATCATTCCGCTCTGTAATTGCTCTAAACTGTAGTGCATGCTTTTACTTGTATTAT  
ATTTGTGCTGCTACTATGAGCTTATCTCTAGTCTTTTTTTTATCATCTTGTATCATGTGCTTTTTCAATGAATGA

>Cucs.189390

ATGGATATAATTTCTCCTGTCGTTGGACCAATTGTGGAGTACACTTTAAAGCCTATTGGTCGTC AATTGAGTTATCTATT  
CTTCATTGCGCAACATATTTCAAACCTTGAGAGTCAAGTTGAATTTGTTGAAGAACACTAAAGAATCGGTGGTTAACAAG  
TTAATGAAGCAGATAAGAAATGCTGAAAAGATAGAATCCGGTGTTC AAGTTGGTTGACTAAGGTGGATCCAAATTAATGAA  
AGACTGCAAAACGTTACTAAAGAAATCTTTCTGAGCAAGGTTGATTTGCTTGA AATTTGGTCCAGAGACACCAATTAAGTAG  
GAAAGCTGTAAAGTTGGCTGAGGAGGTTGTTGTGATAAAAATTTGAGGGGAATTTGATAAAGTCTCCTCTCCTGTAGCTC  
TTTTCAGAGGTTGAGAGTTCAAAGGCAAAGAAATCTGATTTTGTGCACTTTGAATCAAGAAAAGCCAACTATTGACAAAATC  
ATTGCTGCACCTTATGGATGATAATGTCCACACAATTTGGAGTGTACGGGATGGGAGGTTGGC AAAACAATGCTAGTCCA  
AGAGATTTCAA AATTAGCTATGGAGCAAAAGCTATTTGATGAAGTAATCACATCAACTGTTAGTCAAACGCCAGACTTAA  
GAAGAATTC AAGGACAACCTGGTGATAAGCTTGGACTCCGATTTGAACAAGAAAACAGAAGAAGGAAGGGCTCTTAAGTTA  
CTAAATAGTTGAAGATGGAACGTC AAAAGATCCTCATTTGACTTGTATGATGTTTGAAGCAAATTTGACTTGGAAAAAAT  
AGGAATTTCAAAGCATTTGAAGATCACAGTGGATGCAAGATCCTATTTACCTCTAGAGATAATGATGTTCTCTTTAATGATT  
GGCGCACATATAAAAATTTT GAGATAAAAATTTTACAAGAGGACGAGACGTGGAATTTATTCAGGAAAATGGCTGGTGAG  
ATTTGTTGAACATCTGATTTTAAAGATATAGCTGTTGAAATAGTAAGGGAATGCGCACATTTGCCATTTGCTATTACTAC  
AATCGCTAGGGCATTGAGAAATAAACCTGCATCCATTTGAAAAGATGCCTTAATCCAAC TAAGAAATCCTGCTTTTGTGA  
ATATTAGAGAAAATAAATAAGAAAAGTGTATTTCTTCCCTAAAGTTAAGTTACGATTACTTAGATTCTGAAGAGGCCAAATCA  
CTATTTTGTCTGTGTAGTATGTTCCAGAAAGATTATATCATTTGATTGTCAAGGCTTGCATGTATACGCTATGGGCATGGG  
TTTATTGCTAGTTGTTGAGAGTGTAGCACAGCAGCAAAATAGGATAACGAAAATAGTTGATGATCTCATATCTTCTTCTT  
TGCTTTTTAAAAGAAATCAAATGTCGATTTGGTTATGTATGTTAAAATGCATGATATAGTTCTGATGTGGCTATAAATAAT  
GCATCTAAAGATGATCGTATTTTTACTAAGCTATTTCAAAGGATTTGGATGAATCATGGGATGAAAAGAAAAGTACTAGT  
AGGTAAGCATACTGCAGTGTGCTTAAATGTTAAAGGTTTGCATAACCTTCCCAAAAAGTTAATGCTACCCAAGTTTCAAGT  
TATTGGTGTTTTGTGGAACCTTATTAGGTGAACATGAGTTGCCAGGAACATTTTTTGAAGAAATGAAAGGGATGCGAGTT  
TTGGAATAAGAAGCATGAAAATGCCCTTATTGTCACCATCACTTTACTCTTTGACAAAACCTTCAATCGTTGCATTTGTT



TGATTGTGAATTGGAAAACATAGATGTGATTGTGAGTTGAACAACTTGGAAATCTCAGCCTAAAAGGATCACATATCA  
TCCAGATCCCTGCAACTATAAGTCAATTGACACAACATAAAAGTATTAGACTTATCAGAATGTTATGCACTAAAGGTAATT  
CCGCCTAATATTCTTGTAAATTTGACAAAAGTTGGAAGAATTATATTTGCTAAATTTTGTATGGTTGGGAAAGCGAAGAATT  
GAACCAAGGAAGAAGAATGCTAGTATATCTGAGCTTAGTTACCTTTCTCAGCTTTGTGCTTTAGCATTACATATTTCAA  
GTGAAAAGTTATGCCAAAAGAGTTGTTTTCAAGGTTTTCCCGTTTGAGTTGAATGAAAACGAATCTTCATATTTGAAG  
TATCTCTACATCAACTATAAATTCAAATTTTCAACATTTTATCCATGGACAGAACAAAGACTAATTTGCAAAAAGTCTTGT  
CAATATGGAGCGTCTGGAATGAGCTATTTGGAGAATTTGGAGAGTTTTTTTTCATGGTGTATATAAAGATATTTCTTTCA  
ACAACCTGAAGGTCATAAAGTTGTTAAGTTGTAATAAATTAGGAAGTCTTTTTTTGGATTCCAACATGAATGGCATGTTA  
TTGCATCTTGAGAGGATTAACATTAATGATGTGTGAGAAGGTGAAAACAGTTATTTAATGAAAAGTGGAAACCCATCTGA  
CCCTGTTGAATTTACAAATTTGAAGCGTTTAAGGCTAAATGGGTTACCACAACCTTCAAAGTTTTTACTCCAAAATTTGAAC  
AATTGAGTCTGATCAAGAAGCAGAAAAGATGAGAGAAGCAGAAATTTCAATGATGGTTACTTTTTAATGAACAG

>Cucs.237070

ATGGAACTGTAATCGCAATTTTAGGGACAGTTGTGAGTACGCAGTTGCACCCATTGGACGTCAAGTAGGATATGTTTC  
TTCTACAAAAGAACATCAATGATCTTAAAGACCAACTTCAAAAATCTTGTGGATACTAAAACAAGGCTACAACACATGG  
TCAATGAGGCAAGAAGTAGTGCGTACAATATCCAAAGTGATGTTTCATCATGGTTGAACCAAGTAGATAAAAATCATTGAA  
CAATCCAACGCATATTGTACAAGAATGAAAATGAATCAATAGCAAGTATTGTTCCAATAAGCTTAACCTTCAATTCATCA  
ATATCAAAATGAGTAAGAAGCTAAGAAGATGGTGAAGTAATTTCCAAAATATAGAGAAAAGAAAGTTGATGTTTTCCACC  
AAGTTGGTTTCTTACACCTCTTTCAAGGATTCATGGAAGTTCTACTAGTAGTTCTCATGGCTATGATCAGATTTTTGGAA  
TCAAGAACATCAATCGCCAAGCAAATTAGAGATGCACTCGTTGATTGTAACGTGAATAAGTTGGAGTATATGGTATGGG  
AGGTGTTGAAAAACTACGCTGCTGAAACAAGTACACCATTAGTGATGGAAGAAAATTTGTTTGTATCAGTGTATTATAG  
TGAATGTAGTCAACATTTGGGGGTAGAAGGCATACAAGTCAAATTTGGAGATAAGTTAAGGTTGGAATTTAAATAAGAAG  
GTAGAGAGTAAGGAGGGAAGAGCATCTTTACTACAAAATAAGTTGGAGATGGAAGTAACGTCCTCTTGGTGTAGATGA  
TTTATGGAAGGACTCGATCTAGAAGAGGTTGGAATTCCTGTAGATCAGAGTCATGTGAAAAGGGATGTAAGATACTCA  
TAACAAGTCGAGATAGAGATGTCTTAACTAATGAAATGGACACACAAGTTTATTTTCGAGGTGAAGCCTTTAAGTGAAGA  
GAATCATGGGAGTTTTTCAAGAACATGATTGGTGAAGTTGATAATAAATGCATAGAACTAATAGGGAAAGAGATGGTGA  
GAAGTGTGGGGGATTGCCAATAGCACTTGTACAATTTGTA AAAACTTTGAAGGGGAAGGAAGTGCCTATTTGGAAGGATG  
CTTTGAAGCAATTTGAAAATCCTATTGCAGTGGATGTTAAAGGGGTGACTGATGTATTCCAGATGATTATGAGATTTCT  
GTGGAAGACTTGCAAATATATGCCATGAGTTGAGATTGTTAAACCAAGTGAATACCTGGGACGAAGCTAGAAAACAGGGT  
AATTAATTTGGTTGATGATCTTAAAGCTTCTTCTTACTTCTAGAATCCAATTTCAAGGGATAATCATGTTAAAAATGCATG  
ATATCTTCGTGATGGCAATATACATGTCATCAAAGGAAGCTAATATGTCTACATTTAGCTATGAGTATGGTTTCGGGCTGAGT  
GAATGGCAAGAAAAGGATGACATGGATTCTATAGCAATCTTTGGAACACTGTCAACAACCTTCTACAACCTTCTCTCAAAA  
CTTAGAGTTTCCAAAACCTGAATTTGTTGATATAGATGGACATGATTGGAGGGGAGAAAAACTTCAAATTTGTTACTCTT  
TTTTTGAAGGAATGAAAGAACCTTAAAGTTTTGAACTTGTCAAGGATGTGTTTTCAACTACTAAGGAGGCCATCAATCCAC  
TCTCTAGAAAATCTTCAAACATATGATGTCACATTTGATCATTTCAATGACATTTGATGCAATAAGTCACTAAAGAAGCT  
ACAAATTTTGAGGATTGATAAATGTCCAATCACATTTGTTACCTAAAAGCATGAGTCAATTTGACACAACCTTAAAGGTACTAC  
AAGTGTCAAATTTGCCATTTGAAAGTGATTTCTCCAAACACCTTTCAAGCCTTTTGAAGTTACAAGCACTAGATATATGG  
ACAAGCTTCAATGGCTGAGGAGAAAGATACACAAATAACAAATTTGATCAATAATGCAAGGCTATCAGATTTGAAGTG  
TCTACCACATCTAACAAATTTAAAGATACATATCTTGGACATCAAATTTCTTTCAGATCTAATATTTCTGAAAAATTTGA  
AGCTAGAAAGATTTGTTATCCATGTTGGTGAATTTGAAAATGTCCCAAAGGTTGCAAGGATGTGAACAATATGCAACAAC  
TTGATGCTTAAATCATAACATCATCATCCAAATTTGTTTCAATCGATCATCATGAGTCTTGTCCCTTGA AAAAATGGA  
GAGCTTGGAGAATATAGTTTCATGCAGATGTGTTTACAAGTCTTTTCAAGAAAGTTGAGATCCATAAAAGTAAATAGTTGTA  
AGAGATTAAGGTATCTCTTCTCTTCTTCTATCTTTAAAGGCTTGTGGATCTACAAAGGGTTTTTATATTTGATTGCAAC  
ATGATGGATGAGATACTTTGCATGGATAGTGAAGACTCAACAATTTGCAGTTGAAGGCAATTTCTATTGAGTGTCTCAAT  
GAAGATTTGACAATCATTGGAGCACATAAATTTGAAGATGTTATGGCATAAAAATGGGTTGGCTCCAAAATTTCTTTCAGCA  
AACTCCAAAGGATAAGTATCAATAGTTGCAACACTTTAAGATACCGTGGG

>Cucs.237390

ATGGTCCCTTCTTCTCCTTCTTCTTCTGCTGCTTCTTCTTCTTCTTCTCCTTCTTCTTCTCCTTCAATTTGGTAAATGGAAT  
TGATGTGTTCTTGAGCTTTTCGAGGCGAAGATACACGTGGTGGCTTCACGGATCATCTCTACAAAAGCCTTAACACGAAAG  
GAATTTCAACATTTAGAGATGAAAATGAGATCGAAGAAGGTGAACACATTCCTTCAAATCTGCTGGCTCCATTGATGCC  
TCGAGATTTGCCATTGTTGTGGTTTTCGGAAGATTATGCATCTTCAAGATGGTGCCTCGAGGAATTGGCTAGGATGTTTGA  
ATGTA AAAAAGAAAGTTTTTACCAATTTTTTATAAAGTGGATCCCTCTCATGTGAAAAACCAAAGTGAACGTTTGAAGAAG  
CTTTTGTAAACATGAAAAGAGATTTGGAAGAGGTGATGGAAAGGTTCAAAGTTGGAGGACGTTTCTCACCGAGCTTGT  
AACACCAAAGCTTGGCTTTCTCAATCTTGGTTCACATGAATCAAATATCATTGAAGAAATCACCACAAAAATATGGA AAA  
ATTGAAACCAATTTGACAGTCATTAAGGAAGACCAACTAGTTGGAATTAATTTCTAAAATAAAACAACTTTCTTCACTTT  
TGATTTCAAACCTCAGATGATGATGATGCTGATGATGATGATGATTTTTGTTGGGAATACATGGAATGGGTGGCATTGGTAAG  
ACCACAAAGCTAGGGTCTTTATGAGCGAATTCGTGACGAATTTGAAGCTCATTTGCTTCTCTCCACGTTTCGAGAGAA  
TTATATCAGAACCTTGGGAACCTTTTCATGTTTACAACCAAACCTCCTTTCAAGCATGTTTTTCGCTTAAAAACAATCACA  
TAATGGATGTTGAAGAAGGTACCGCTATGATCAATAAAGCCATTTTTCGAAAAAGACACTTCTCGTCTTGCAGACGTG  
GATTTCTCGGATCAAATCAAAGGATTGATTCAGACAACAACCTTTTTGGCAATGGAAGTAGAGTCATCATCACAAACAG  
GAATGCGGATTTTCTTTCGAATGAATTTGGGGTGA AAAAGATTTTTGAAATGGATGAACCTAAATATGAGGAAGCTCTTC  
AACTTCTTAGTTTGTAGTGTCTTTATGAAAACATGTCCAAAAGAAAGGTTACTTGGAACTCCAAAGAAGATTGTAAGGTT

GTGGGAGGCCACCTCTTGCCTCAAATTTAGGGTCTCTCTAAGAAACAAAATTTGAGTGTGTGGAATGAGGTGAT  
AGAAGAGGTTGGAGGAGGTGGGAATATTCATGAAAAAATTTCAAGTGTCTTAAAGTGAGTTATGATGGTTGGATGAAA  
GGGAGAGAGAGATATTTCTTGACGTTGCTTCTTCAATGGGAAGAGAAGAGAAGTTGTAGAAGAGATATTAATGGA  
TGTGGTTTCTATGCCAAAACAAGGATTTGAACCTTCTTATTCAAAAGTCTCTCTTAACTTTCTTATGACAATAAGTTACA  
TATGCATAAATTTATTGCAAGAAATGGGTGAAAGATTGTTGGGATAAGCATGTTTCGAGATCGATTAATGTGCCACAAAAG  
ATATAAAAAGTGTGGTGACAGAGGCATTGATCCAAAGCATATTTTTCAAAATCAAGTTCAAAGAATATGGTGAATTTCCA  
ATTTTGTTTTCAAGAATGCACCAACTTAGGCTGCTTAATTTTCGCAATGTGAGACTGAAAAACAAGTTGGAATATAGCAT  
TCCAAGTGAGTTAAGGTATTTGAAGTGGAAAGGATATCCGTTGGAGTTTCTGCCAATCGATAGCTCTGAAGAATGTAAGC  
TTATTGAGCTTCACATGTGCCATAGCAATCTCAAACAATTTTGGCAACAAGAAAAGAATTTGGTGGAGCTGAAGTATATC  
AAACTCAATAGTTCTCAAAGTTGTCCAAAACCTCCAACTTTGCAAAACATTCCAAATCTCAAAGATTAGAGCTTGAAGA  
TTGCACAAGTTTAGTCAACATTCATCCATCAATTTTCACTGCAGAAAAACTCATATTTCTGAGTTTGAAGATTGCATCA  
ATCTCACCAATCTTCTTCTCACATTAACATCAAGGTTCTTGAAGTCTTGATTCTCTCTGGTTGTTCAAAGTAAAAAAA  
GTCCCTGAATTTTTCAGGTAACTAATAGATTACTCCAACCTCCATTTGGATGGTACCTCCATATCAAACCTACCTTCATC  
AATTGCAAGCTTGAGTCACTAACAATATTGAGTTTAGCCAACTGCAAAAATGTTAATCGACATTTTTCGACGCGATTGAGA  
TGACATCTCTCAAAGCTTAGATGTTTCTGGATGTTTCAAGCTTGGAAAGTAGAAAAGGAAAGGGGGACAATGTGCAATTG  
GGGAGGTCAACGTGAGAGAAAACACAGAAAGAAGAAACGACGACTGTAACAATATTTTCAAAGAAATCTTCTTTG  
GTTATTGCAACTCCAGCTACTGGCATTTTTGGGATCCCATCATTTAGCTGGTTTGTACTCTCTTACAAAACCTAAACTTGA  
AGGATTGCAACCTTGAAGTAACTCCACAAAGGATTGAGTGTATGGTGTCAATGGTAGAGCTCGACTTGAAGTGGCAATA  
TTCTCTCATCTTCCAAACAAGCATATCAAGACTTCAATACTGAAAAGATTGAGGATAAAACAATGCAAAAAGCTTGTACA  
TTTCCCAAAGTTACTCCAAAGGATCTTGTTTTTCAGCTCAAAGGATTGCATTTTATTGAAAGATTTTATAGATATTTCAA  
AAGTTGATAATTTATACATAATGAAAGAAGTGAACCTTTTGAAGTGTACCAGATGGCTAACAAACAAGACTTCCATAGA  
TTGATCATTTCTTCGATGCAGAAGATGTTCTTTCGAAAAGGAACATTCACATCATGATTCGGGGAGTGAGATTTCCCGA  
TTGGTTTACAACAAGGAAAATGGGATCTTCCGGATGA

>Cucsa.237450

TATGACGTTTCTCAGCCACAGAGCTAAAGACACTGGACGTAGTTTACAGTCTTATCTTTCATGAAGCTCTAAACAAGTCA  
AGGAATTGTAGTTTTCATAGACGAGGAAGATGAAGATAACGGAGGGAACCGTCAATGGAGAAGACGAAAGCGGTGGATG  
AATCGAGGCTTCGATCGTGGTTTTTTTCGGAGAATTATGGGAATTTGGTTTGCATGAAGGAAATAAGGAAGATTAGAATG  
TGTCAGAAGTTAGGGGATCAATTGGTCTTCCAGTATTTTACAAAATAGATCCAGGCGATGTGAGGAAGCAAGAGGGGAG  
CTTTGAGAAGTACTTTAATGAACATGAAGTCAATCCTAATATTAGTATTGAAGAGGTTAAAAAATGGAGAAAATCTATGA  
ATAAAGTTGGCAATCTCCGGATGGCATGTCCAAGATTCCAGTTAACCTTCAGTGTACTCTCGTCAATTTATGGGTT  
TCTACGAGCTCGTGAAGTTTACCCTTATAGGTTAAATAAATGGAGAAAACCTTCTGTTTCTTTTTTCCAAAGTTGGCTC  
ACAAACAAGGTAATATTATGTGGTGCACGCTCTTCTTTTACAAGGAAGATTGGATGAGTTTGTAGACACTATTATTGACA  
GTGATTGGGTTGCTCCATAAACCTTCATGAGTTTTATGATGGAGTGTTTTAAACGGTATGTTGAGTTTGATAAGATCA  
CAAAGTATGATCCAAATATCGAGGAGGAAGAGGAGGAAGAGGAGGACGAGGACGAGGCTTTGATGGAACTAAAGGAGG  
AAATTATGCTTCCACATCTAGCAGAGTTTACAGGTTCTCTCTCTTTTTATCTCTCTCATGCATTTTAAATTTTCGAGCAA  
CTACAAAATTTACTCCTAAAATGTATGATAGCCGTAGTTGCAATAATTTAAAAAATCAACCTGA

>Cucsa.237500

ATGAGTACTTTTGATACTTTTATAAGTTTTAGAGGCGAAGATACTCGTAACACGTTTACCAGGACATTTGTACAAGGCGCT  
GGTTGATTTTGAATATCGACTTTTATGGACGACAAGAACTCTTGATTGGAGATAGTCTTAGTGAAGATCTTATTGGAG  
CTATAGAAAATCAGGGTCTTTCATTGTTGTTTTATCAGAGAATATGCTTCTTCAAAGTGGTGTGTTGAGAGAATTGGTG  
AAGATAATTGGTTGTATGGTGGAAACAAAAGCGTCGAGTTCTTCTGTATTTTACCACGTGAGTCTCATGATGTTTCGACA  
TCAATCAGGGTGTTTCAAGAAAAGCTTTTGTGAATATGAAGAAATTTCTCAAGACTCAACGATAGGGAAGGAGATAAAT  
ATACGAAGGAGGTTCAAGAAATGGAGGAGTGCCTTGACAAAAGTTGGCGAGCTCGAGTGGAGTAGTTGTAAACAAAAGATGAT  
CTTGAAGCCGTAGCATCGACAAAATCACAGAACAATAAGTTTCTACGTTGCATCAACAAAAGTTAGTAAATTTGGACGA  
GCTCACTGAGTTAGTTGATATTGAACGTCAGTTATGCAAGATGGATAAGCTAAATGATTTGGAGCCAAATGTGGTACGTT  
TTATAGGGATAATAGGGATGGCGGAATTTGGTAAAACAACCATTTGCTGAAGTTTTTTATGAAAAGTTGCATATAAATTT  
GGAAAAATTTGTTTTTGTATTGTTCTTGTATGGGGTGAAGAAAAAAGTCAAGTTAGAACAGTTAGTTGGAAATCCTAATTTG  
GTTTGGTCAAGGGTCCAAAATCATCATTACAACCAGAAATAGGGATGTTCTTCTGTCAGCCAAATTTATAAAGATAAATGG  
TTGAATACAAAAGTGGAGTTTCTTGAATAAAAAGTGGCATGACACTCTTTGCAACAAGCATTTGGATCATGTGATCAG  
TTTCCCAGTAAAGATTTTGGAGACTTTTTCTAAGGAGATTGTAGAAAAGGTTAAAGGACATCCACAGGTTTTGAGACAAAAT  
TGGGTCGCTTTTATATGATAAAGGTATAGAGATATGGAAGAACAATTTGAAGAGTCTTGGAGGAAGATTACAACAATCGTA  
TATTTAAGACATTAAGATAAGTTTTGATGATTTAGGAAAGACAAGCCAAGAAGTTTTTCTGATTTTGCATGCTTCTTC  
AATGAGAAGAGAAAGAGAGTGTGATTGAAATACTTAAGAGTCTTGATTATAGACCTCATAGCGAAATACAATTTGTTGGA  
AGATAGATGCTCATTGAAGTAAGACGTGACAACAATAATTTATGCCTAAGTGCATTCAGCTATGGGTCAACAGATTG  
AACGTGAAGCTGATAAACCGGAGTAGGATTTGGCTTCCGAAAGATGCCATGATGTATTGATGAACCACATAGAGTAAAG  
GACATAAAAAGGTGTAGTCTTGAATTTGAAATTGGAAGAGAAAGCAAGAAAGTAAAGTTAGAGGGTAAAGTTTTTGGAGATTGAG  
AAGTTTTAAAAATATTGAAAATTTGGAAATGTAGAGGTGAGTGGAGACTTCCACATCTCTCAAACAATTTGAGATTGCTCA  
ATTGGCAAAGCTATCCCTACAATGTTTGCATTTACGTTTTGAATCAAGATATTTATTTCAACTTCTTTTGCCTTAAGT  
CAAACAAGGCAACTTTGGAATGGTCAAAGGGATTTGAGAAATTGAAGTTATTAATGTTAGCCGTTTCAAGAAATTTACG  
AGAGACTCCTAACTTTACTAAGGTTCCAAATCTTGAAGTTTGGACCTAAGTTATTGTCCAAGGTTGTGGAAGATTGATT  
CTTCTATTAGTCTCAATCGTTTGGAGTTGTTGGATGTATCGTATTGTATCAATCTTGAAGGTTGCCATTTTCTAGA

AGCTGCAAAAGCCTCGCAAGAATAAATTATGCTGGCTCAGGTCTTGAAGAAAGAGGTATATATACGTACCTTTCATTATG  
GTAA

>Cucsa.237520

ATGTGTCGACCTCCATACCTGGTGTGGGATGATTCATGGATGTTCTTTGATGTTGGCTATACAAAGTTCAAAAATCCAATC  
CATCGCAAATTC AATAGGTGATCACTTGCCTCGTCTTAAGCTCCAAGCCAAAGAAGAAAAATTTATTTGAAATGCCACTTC  
GATTAAGAACAATGAAAATGCTCCTTGGCTTAGGCTCAAATGACGTACGTTTTATAGGGATAGTGGGGATGAGTGGTATT  
GGTAAAACAACCCCTTGCAGAAATGACATATTTACGTATTTTAAAGCCTTTTGTATCTGCCTTACGAAAACCTTACTTTCT  
TCACTTTGTTGGACGCAGTATAGTCTCCTTGCAGCAACAACCTACTTGATCAACTTGCCTTCTAAAACCTATCGATATCC  
AAGTTTTGGATGAGAATCATGGAGTAGAATTGATTATGCAGCATTGTAGTTCACTTAAAAATGTGCTTATTGTTTTTGTAT  
GGAATAACCGAAAGAAGTCAATTAGAAAATGTAGTGCCAGCCCGGATGTTGGTTTGGCGCAGGGAGTCGAATCATTATATAC  
AACCAAAAATAAAAAATATTTTTCATCACCTAATTTCAAAGACAAAGTGAAGAATATAATGTAGAATTTACTTTCTCATG  
AGGCTGCCTTCTCCCTCTTTTGCAGCTTGCATTTGGAGATCACCTCATAACCAGAATATGGATGATCTTTGTAATGAG  
ATGATCGAAAAGGTTGGAAGACTCCCATTAGCTTTGGAAAAATAGCTTTTTCATTGTATGGTCAGAACATAGATGTATG  
GGAACATACATTTGAAGAATTTTCATCAAGTAGTTTATGATAATATTTTTCTCTGATGTATTAAGTCAAGTTATGAAGGAT  
TAGAAGCAGAGAGCCAACAAATTTTCTAGATTTGGCATGTTTCTCAATGGAGAGAAGGTGGATAGAGTGATTCAAATA  
CTTCAAGGCTTTGGTTATACCTCACCTCAAATAATTTGCAATTTGTTGGTTGATAGATGTCTTATTGATATTTTAGACGG  
ACATAACAAAAGACATCAATTGATTTTGTATGGGCCAGAAATTTGTGCACCGCAGCTGGGAATTTGCAACAAACAA  
GGATTTGGCTTCGAGATGATGCTCGTCTGCTATTTTCATGAAAACAATGAATTAATAATATTTCTGGAATAGTGATGGAC  
TTAGAGGAGGAAGAAGAAATTTGGTATTGAAGGCTAAGGCATTTGCAGATATGTCTGAGCTAAGAATTTTACGAATCAACAA  
TGTGCAACTTTTCGGAAGATATGAATGTCTGTCAAATAAATGACGTTGCTCAACTGGCCTGGCTATCCTTCAAAGTATT  
TGCCATCAACTTTTCAACCACCATCTCTGCTTGAGTTACACTTGCCTGGTAGTAATGTTGAACGACTCTGGAATGGAACA  
CAGAATTTTAAAGAACTTAAAGGAGATTGATGCAAGTGATTCGAAGTTTTTGGTTGAAACTCCTAATTTTTTTCAGAGGCTCC  
AAAGCTTCGACGATTTGATTTTACGAAATTTGGAAGACTAAACAAGGTTTCAATTTTCAAATAAATAGTCTCCATCGTCTAA  
TTTTATTGGACATGGAAGGTTGTGTGTCAGTTTCAGAAGCTTCTCATTTTCCGTGCTCACTTGCAAAAGTCTCAAACCTTTAGTT  
CTTTTCGAACTGTGGTCTAGAGTTTTTTTCCAGAGTTTGGATGTGTGATGGGATATTTGACTGAACTACACATTTGATGGGAC  
TTCCATAAATAAACTTTCTCCCTCAATTACAAATCTACTTGGCTTGGTTTTATTGAACCTGAGGAATTTGATTTAGACTTT  
CTAGTCTTCCAACGAAATTTGTAGGTTGAGTTCACTTAAACTCTCATTTGAATGGTTGCAAAAACCTTGGACAAAAT  
CCACCATGTTTGGAGTATGTAAGCATCTTGGAGAGCTTGCATTTGGCGGAACATCCATAAGCACAATTCCTTTCTTGGAA  
AAATCAAGAATTTTGAACGCGAAAGGCTGAAAAGCAATATTTGGCATTCTTTGGCTGGTTTGGCAGCACAGTATTTAA  
GGTCACTCAACGATTTAAATTTAAGTGATTTGTAATCTTGTGGATGAAGACATTTCAAATGATCTTGAACCTTTTCTCTCA  
TTGGAAATTTCTAGATCTGAGCAGCAATCATTTTGAAGACTGTGAGAAAGTATTAACAACCTTATTAACCTTAAAGTATT  
GTACTTGAATGATTGCAACAAGCTAAAGCAAGTACCCAAGCTTCCAAAAGTATAAAGTATGTGGGAGGAGAGAAGTCTT  
TGGGCAT

>Cucsa.237540

ATGCAGAGTTCATCATCGTCTTCTTTGGATCGTCTCAAGATGAACATATGATGTGTTTATAAGCTTTAGAGGTAGAGATGT  
TCGTACACTTTTGCAGGATATTTGTACGATGCTTTGAATCGTTTGGGGATAAAAGCTTTCTTGGACAACAAGAGGTTTC  
TAATTTGGAGATGATCTTTCATGACTTATTTCAAATAATCGATGAATCAAGATCAGCAATTTGTTGTTCTTTTTCAGAAGACTAT  
GCTTCTGCTAAATGGTGTTTGAGAGAGTTGACTAAGATAATGGATTCCATGGGAACCTCAATGGAGCGTGTCTTCTCTGT  
GTTTTATCATATTTGATCCATCAATTTGTTAAAGATCAATCTGGAACCTTTTAAAGACAAGTTTTGATGAACATGAAGCCAATG  
TTTTAAAGGAAATGATAATCAAGAGAAGGAGAAGCGCTTGAAGGAACTCCAGAATTTGGAAGGATGCACTGAAGAAAAT  
GGCAATCAGACTGGAGTTGTCATCACTAAGAACAGTTCTGAGGTAGATATAGTAAATAAAATTTGCAAGTCAAATATTCGA  
TGCATGGCGTCTCAAGTTGGAAGCATTTGAATAAGAATTTAGTTGGAATGACATCCCGATTGCTCCATATGAACATGCATC  
TTGGTTTTAGGATTAGACGATGTACGCTTTCGTTGCGATGATGGAATGGTGGTATTGGTAAAAACAACATTTGCTCAAGTC  
GTTTTTGTATTGCATTTCTTCAAAGTTTGAAGATTGCTGCTTCTAACAATTACCTGGAGGTGATTCAAAGCAAAGTTTTAGT  
GTCATTACAACGGGAAATGCTTTCTCAAATTTTTTATAAAGAAGTTTTTGAATATGGCATGAGAATCATGGAGTAGAGA  
TGATTAATAAATCGACTGAGTGGTAGAAAGGTTCTTATTGTCTTGTATGGCATCGAAGAGAGAAGGCAGTTAGAAATGTTG  
GCTGGAAGCATCGAGTGGTTTGGTCTTGGAGCAGAATCATCATTACAACATAGAAATAAAGGATTATTGTGCCATCCTAA  
TTATGATGAAATGAAAGTATACAATGTTGAAGAAGTATGATCATGATAGTCCCTTCAACTCTTTTTTGAAGCATGCATTTG  
GTAGTAAATCATCAAACAATGACAGTTTTCATGGATCTTAGTAATGAGATAGTTGAGAAGGCTAAAAGACTTCCATTAGCT  
TTAAGAGTGATTTGGATCTTCTTTGTATGGTAAAGATATTACAGTATGGAGAGAAACGTTGAAGAGCTGATCAAAGTGGAA  
TGAAAGAAATTTTTTGTATGATTGAAAATAAGTTATGATGGATTAGGAGTTGAAAGCCAAACAAGTTTTTCTTGCATTA  
CATGTTTCTTCAATGGAATAAATGAAGATAGAGTAATTTGAATATTTAGAGAGTTTTGGTTATAGTCTTAATAGTGAAGTA  
CAATTAAGTATGCAAAAGATGTTAATTTGAAGTTTTCACACAGAAAATATTTGGTGCATGATTTAATTTCTTGAATGGGTG  
AGAAATTTGTCGTAAGGAGTCCCTCACTCAAGCAGAAAACAGAGTAGGATTTGGCTTCAATGAAGATCTTTACTGCAGGT  
TTGCTGAAAACATGACTGATGCATATTTCAAGGATAGTTTTAAGTTTGGCAAAGAAATGGAAGAATCAATAGAATTTG  
GATGCTGAATCCTTTTTCAGAGATGACCAAACCTAAGAATACGGAATCAGTAATGTGGAGCTCGATGAAGACATTTGAATA  
TCTCTCTCCACTTTACGGATAATTAATTTGGCTTGGCTATCCTTTCGAAGAGTTTGGCCCCAACGTTTCAATCCCGCTATT  
TGTTTGAACACTCTTGCCTCATAGTCCCTTTTACGAATTTGGGATGGAAAAAGAGATTTCCAAAGCTGAAATTAATTT  
GATGTTAGTAACTCAGAACACTTGGAGGTGACACCTGATTTTTCTGGGGTTCCAAATCTTGAAGATTTGGTTCTATGTAA  
CTGTGTTAGACTGTGTGAGATTCATCCCTCCATCAATTTCCCTCAACAACTCATTTTTACTGGATTTAGAGGTTTGGTGT  
ATCTTAAACATTTTTCAGCAATAAAGATGTAATAATTTCCAAACACTCAAATTTCTGGTACAGGTCTTGAATTTTTT

CCAGAGATAGGCCATATGGAACATTTGACTCATCTTCATCTTGATGGATCCAATATAACCCATTTTCATCCTTCAATTGG  
GTATCTAACCTGGCTTAGTTTTCTTGGACCTATCCTCCTGTTAGGTCTTTCTAGTCTTCCCTTGTGAAATTTGGTAACTTGA  
AGTCTTTGAAAACCCCTCCTTTTGAATATTTGAAAAAAGTTGATAAAATCCCTCCAAGCTTAGCAAATGCAGAATCCTTG  
GAGACACTTTCTATTAGTGAACCTCAATAACCCATGTTCCACCAAGCATTATTTCATTGTTTAAAGAACCTAAAAACGTT  
AGATTGTGAAGGACTATCATGGAATTTGGAAGTCATTGCTCCCCCAATTCAACATTAATCAAACAATAACCACTGGTT  
TGGGGTGCCTCAAAGCTCTAAATTTAATGGGTTGCAAACCTTATGGATGAGGACATTCCTGAAGATCTCCATTGCTTTTCT  
TCATTAGAAACACTAGATCTCAGCTATAATAACTTCAACAACCTCCCTGATAGTCTTAGCCACCTCAAGAAGTTAAAGAC  
ATTGAACCTGAATTGTTGCACTGAGCTTAAAGACTTACCAAAGCTTCCAGAAAGTTTGCATATGAACGATTTAGAAGTA  
AGTTTGATCTGCTTCTACATGGAGATAAGATCCCAAAATTTTTCAGCAATCAAAGCAAAGGAAACATGACAGAAATAAG  
TTACCACAATATTTGGAAAAATTTGAGAGAGTATAGGTGTTGCTGTGTGCTCTTGTGGTGTGGACAAGAAAAGAAG  
AAAACATAATGAGATTATCCAGAACGAGAGGTATACAAAAGTTGTGGATCTTATATGTAATTCAAAGTTGACTCGT  
ATCAAATTTATGCCAGAGCCTGTCACTTCCATCCCAACAAAAGTTGAGTGAATATGCTTCAACAATTCCTTTGGCTC  
TCTTACATTTCCCTTTCATGGATTTAATATCAATTGGCATTATTGCACCCAGTTTGAATTCGACTTGAACCTAGCTGTGA  
TGAGCTATTTGGAGTGAAGAATTGTGGTCTTCATCTCATAACATAAGCATGAAAGGATGATGATTGATAAGATGGTAAATGG  
AGTCAACTGTTCCATCATCCACTAGCCACAAAGGAAAGGAACCTCAAATTCATTGA

>Cucsa.237560

ATGGCTTCCACACCCCAAGGAATTATCTCTTTTTCTTCTTCTCCTAGATTATATTTGACGCTTTTCTCAGCTTCAG  
AGGCGTCGACACTCGCAAGATGTCACAAATCGTCTTTACGAAGCTCTGAGGCGACAAGGCATCATTGTTTTCAGAGATG  
ACGATGAGCTCGAGAGAGGGAAAGACTATTGCTAACACTCTAACCAACTCGATTAACCAATCCAGGTGTACCATTGTTATT  
CTCTCTAAAAGATATGCAGATTCAAAATGGTCTTGGAGGAGTTGGTTGAGATTGTCAAATGCAAGAATACCTTCAAGCA  
ATTAGTTCTTGTGGTTTTCTACAAAATTAAGCCCTCCGATGTCAACAGCCCTACTGGGATTTTTGAGAAAATTTTTGTTG  
ATTTGAAAATGATGTTAAGGAGAATTTGAAGAGGTTCCAGACTGGAGGAAGGCCATGGAAGTGGTGGAGGTCTCCCT  
CCATGGCCTGTAATGAACAGACCGAAACAGAGAAAGTCCAAAAGATTGTTAAGCATGCTTGGCATCTTCTGCGTCTGTA  
TTTGTCTTAGCCATGATGAGAATTTGGTTGGCATGAACTTGAGATTAATAAAAAAATGAATATGCTTATGGGCATAGGACTGG  
ATGATAAGCGCTTTATTGGGATATGGGGATGGGTGGAATAGGCAAGACAACCTATTGCTAAAAGCTGTTTTCAAAGTGTCT  
GCTCGTGAATTCATGGAAGTTGCATTCTGGAATAATGTTAAGAAAACCTTTAAAGAATGTTGGAGGCTTGGTGTCTTGC  
GGAGAACTTCTTTCCGATACTCTAATGAGAGGAAAAGTTCAAATTAAGATGGCGATGGAGTTGAAATGATAAAGAAAA  
ACTTAGGAAATCAAAGGTTTTTGTGTTCTTGATGGTGTGATCATTTTAGCCAGGTGAAAGATCTGGCAGGAGGAGAA  
GAATGGTGTGGTGTGGAAGTAGAATCATCATTACAACAAGAGATGAAGGTTTGTCTTCTTCTGGAGTTGATATAAG  
ATACAATTTGAGAGTTTCGATGATGAAGAGGCTCTTCCAGCTCTTTGCCATGAAGCATTGGAGTAAAGTTCCCTAAGA  
AAGGTTATTTGATGTTTTGATGCCATTTATAGAATATGCTGAGGGCCCTCCATTAGCAATCAAGGCTCTGGGCATCT  
TTGCACAATAGATTGTTAAGTCATGGGAAGGTGCTATTAGAAAAGTTAAATAATCTTTAAAACAGGCAAGTATATGAAAA  
CTTGAATAATTAGTTACGATGCCTTGGAAAGGAGAGAGGAGAATTTTTTGTATATTGCCTGTTTTCTTAAAGGACAGA  
ACAAAGACCAAGTCATTGACACATTCGTGAGTTTTGAAATTTGATGCTGCTGATGGGCTTCTTACCAGAAAAAATGCTGCC  
GATGTACTTTGTATAAAAAGAACTGCTGCTGATGCTCTAAAAAATTTGCAGGAGAAATCCCTTATAACTATGTTATATGA  
CAAAATAGAGATGCATAATTTACACCAAAAACCTAGGTCAAGAAATTTTTCATGAGGAGTCATCGAGGAAAGGTAGTAGGC  
TATGGCATCGAGGATGAACTAACCCAGCTTTAAGGCATAAACAAGGAGTGAAGCTATTGAAACCATTCTTGGACTCA  
AAAGAGCATCGAGAGTCACTTAAATGCCAAGTTCTTTTTCAGCAATGACCGGTCTAAAAGTGTGCGTCTTGCATAATGT  
ATTCCTTTCTGGAGTTCTTGAATATCTCTCAAACAAGTTGAGACTTCTCAGTTGGCATGGATATCCCTTCAGAAATTTAC  
CATCGGATTTCAAGCCGAGTGAACCTATTGGAACCTCAATTTACAGAATAGCTGCATTGAAAATATTTGGAGAGAAACAGAG  
AAGTTGGATAAATGAAGGTAATTAACCTTAGTAATTCGAAGTTCTTATTGAAGACCCCTGACCTGTCAACGGTGGCCAAA  
TCTTGAGAGGTTGGTCTTGAATGGTGTGTAACAAGACTACAAGAGCTTCCCAATCTGTGCGCACTCTAAAGCATCTAATCT  
TTTTGGATCTTAAAGACTGCAAACTCTCAAAGCATTGTTCTAATATTTCTCTGAATCACTCAAGATTTCTCATTCTT  
TCTGGTTGTTCAAGACTTGAAAATTTTCCAGAGATTGTGGAAACATGAAACTTGTGAAAAGAGCTTCAATTTAGGACACT  
TGCTATTTCGAAAATTCATGCTCAGATTGAAAAACTTACAAGCCTTGTTTTGTGGATCTTAGATACTGCAAAAATCTTC  
GTACACTTCCAAATGCAATCGGTTGCTTAAACATCCATTGAACATCTCGCATGGGTGGCTGCTCAAAGCTTGATAAAAT  
CCTGACAGCTTGGGGAACATTTCTTGTTTAAAGAACTTGTGATGAGTGGTACTTCTATTAGTCATATCCCATTTACTCT  
AAGACTTTTGAAGAACCTTGAAGTATTGAATTTGCGAAGGCCTATCCCGAAAATTTATGTTATTCGTTGTTCTATTATGGA  
GTACGCCGAGGAATAACAATTCACATTCATTTGGTTTGTGGTTGATAACTTGCTTAAACGAATTTTAGTTCCGGTAAAGGTT  
TTGAATTTTAGTATTGCAAGCTGGTAGATGGAGACATACCCGACGACCTCAGCTGTTTGTCTTCAATTCGACTTTCTGGA  
TCTAAGCAGGAACCTCTTCCCAATCTGCCTCATAGTTTGTGAGTCAACTTATCAATCTCAGATGCCTTGTTTGGACAAC  
GCAGTAGACTCAGGTCAATACCAGGTTCCAGTCACTTACTTTATGTACTCGCAAGGGATTGTGTGCTCACTGAAAGAA  
CACTATAACTATAACAAGAAGATCGCGGCCTATGAGCCAAGCAGAAGTAAGGGTCTTAGTTACCCCTCATCAGCTAA  
AGACAAAACCTCTAAAATCTCTCAGTTAATGATATCAAGTATGTGCACAGCTTGCAGAAATGGGGGTTGA

>Cucsa.237410

ATGGAGAGAAGAGCTTCAATTAATCCTTATCTCCTCCTCCCTATTCTATCTCTTCTTCTTCTCCTCCCTTACGAAACTA  
TGACGTTTTTCTCAGCCACAGAGTTAAGGATACCGGGAGTAGTTTCGCAGCTGATCTTCAATGAAGCTTTGACAAACCAAG  
GAATTGTAGTTTTTCAGAGACGGCATAGACGACGAAGACGACAGCAACCATATGTAGAGGAGAAGATGAAGGCCGTGGAA  
GAATCGAGGCTTTCGATCGTGGTTTTTTTCAGAGAACTACGGGAGTTTTGTTGTCATGAAGGAAGTAGGGAAGATTGTAAC  
GTGTAAGGAGTTGATGGATCAACTGGTCTTCTCTATATTTTACAAAATAGATCCAGGCAATGTGAGGAAGCAAGAGGGGA  
ACTTTAAGAAGTACTTAAATGACCATGAAGCCAATCTAAGATTGATATTGAAGAAGTTGAGAAGTGGAGATATTCTATG

AATCAAGTTGGCCATCTCTCTGGATGGCATGTCCAAGATTCCCAGTCTGAAGAAGGGAGCATAATCAATGAAGTTGTGAA  
GCATATATTTCAACAAATTGCGTCTGATTTGTTTCGATATGATGATAAATTAGTTGGAATTTCCCAAGATTACACCAAA  
TAAATATGCTTTTGGGAATAGGTTTAGATGATGTACGCTTTGTTGGAATATGGGGAATGGGTGGAATGGCAAACTACA  
ATTGCTAGAATCATTTACAAAAGTGTTCCTCATTTATTTGATGGATGTTATTTCTTGGACAATGTCAAAGAAGCTTTGAA  
GAAAGAAGACATAGCTTTCATTACAACAAAAGCTTCTAACAGGAACCTAATGAAAAGAAAACATTGCATCCCTAATGCTG  
ATGGAGCTACATTAATTAAGAGAAGAATAAGTAATATTAAGCTCTTATAATTCTTGACGATGTCAACCATCTAAGCCAA  
CTTCAAAAATTAGCCGGCGGTTTAGATTGGTTTGGCTCAGGAAGTTCGAGTCATCGTTACAACGAGAGACGAACATCTCCT  
AATTTACATGGAATCGAAAGACGATACAATGTTGAAGTGTGAAAATTGAAGAAGGTCTTCAGCTTTTTTTCACAAAAGG  
CATTTGGAGAAGAGCATACAAGGAAGAGTATTTTGATGTTTGTAGCCAAGTTGTAGACTATGCTGGAGGACTTCCATTG  
GCAATTGAGGTTCTTGGATCTTCTTTACGTAATAAACCAATGGAGGATGGATAAATGCAGTGGAAAAGTTGTGGGAAGT  
TCGTGATAAGGAAATTTAGAAAAGTTGAAAATTAGTTATATATGTTGGAGAAATCTGAACAGAAAATTTTTCTAGATA  
TTGCATGTTTTTTTAAAGAGAAGAGTAAGAACAAGCAATAGAAAATTTCTGAAAAGTTTTGGATTTCTGCTGTTCTTGG  
CTAGAAAATTTGGAGGAGAAATGTCTTATTACTACACCACATGATAAGCTACATATGCATGATTTAATACAAGAAATGGG  
CCAAGAAATTTGTCGCAAAAATTTCTGAAAGGACCCGAAAAGCGAAGTGGTTGTGGCTTCGTGAGGATGTCAATCTCG  
CACTAAGTCGAGATCAGGGAACAGAAGCAATGAAGGGATAATGATGGATTTGGATGAGGAAGGAGAATCACATTTGAAT  
GCCAAAGCCTTTTCAGAAAATGACAAAATCTAAGAGTATTGAAAATTGAACAATGTTTCATCTTAGTAAAGAAAATTTGAATATCT  
GTCTGATCAACTAAGGTTTTCTCAATTGGCATGGTTACCCTTTAAAGACCTTACCATCAAAATTTCAATCCCAAAAATCTAT  
TGGAGCTTGAGTTGCCAAAATAGCTCTATTACCATCTTTGGACTGCTTCAAAG

>Cucs.237440

ATGACATCCTTATCTTTTCTCCTCCTCCTCCTCCTTATTCTATCTCTTCTCCTCCTCCTCCTTACGAAGATATGA  
CGTTTTCTCAGCCACAGAGCTAAGGACACTGGATGTAGTTTCACTTCCACCTCCACGAGCTCTAACAGTCAAGGAA  
TTGTAGTTTTTCATAGACAAGGAAGACGGAGGAAAACCGTTAACGGAGAAGATGAAAGCGGTGGATGAATCGAGGTCTTCG  
ATCGTGGTTTTTACCAAGAAATATGGGAGTTTGGTTGTCATGAAGGAAATAAGGAAGATTAGAATGTGTCAGAAGTTAAG  
GGATCAATTGGTCTTCCAGTATTTTACAAAATAGATCCAGGCAATGTGAGGAAGCAAGAGGGGAGCTTTGAGAAGTACT  
TTAATGAACATGAAGTCAATCCTAATATTAGTATTGAAGAAGTTAAAAAATGGAGAAAATCTATGAACAAAAGTTGGCAAT  
CTCTCCGGATGGTCTGAAGAAGGGACCATCAATGAAGTTGTGAATCATATTTTCAACAAATTACGTCCAGATTTATTTCCG  
ATATGATGATAAATTAGTTGGAATTAGCCGAAGATTACATGAAATAAATAAGCTAATGGGAATAGGCTTAGATGACGTAC  
GGTTGATTGGAATATGGGGAATGGGTGGAATTTGGCAAAAACAACCATCGCTAGAATCATTTACAAAAGTGTTCCTCATTG  
TTTGTGATGATGTTATTTTTTGGACAATGTCAAAGAACTTTAAAGAAAGAAGGCATAGCTTCTTTACAACAAAAGCTTCT  
AACAGGACTCTAATGAAAAGAAACATTTGACATCCCTAATGCTGAAGGAGCTACATTAATCAAGAGAAGAATGAGTAATA  
TTAAAGCTCTTATAATTTCTGATGATGTCGACCATCTAAGCCAACTTCCAGCAATGTCAGCAGTTAGCTGGCGGTTCCGATTTGGTTCGTT  
TCAGGAAGTCGAGTATCGTTACGACGAGAGAAGAACATCTCCTAATTTTACATGGAATCAAAAAGACGATACAATGTTGA  
AGTGCTGAAAATTGAAGAAGGTATTACGCTTTTCTCACAAAAGGCATTTGGAGAGGACCATCCAAAGAAAGGGTATTTTG  
ATCTTTGTAGCCAAGTTGTAGATTATGCTGGAGGGCTTCCATTAGCAATTGAGGTTCTTGGATCTTCTCTACGTAATAAAA  
CCAATGGAGGATTGGATAGATGCTGTGAAAAAGTTGTGGGAAAGTTTCGTGATAAGGAAATTTATGAAAAGTTGAAAATTTAG  
TTATTATATGTTAGAAAAGATGATAGGGAATTTTTCTAGATATTGCATGTTTTTTTCAAGAGGAAGAGTAAGAGACAAG  
CAATGAAAATTTCTGAAAAGTTTGGATTTCTGCTGTTTTTGGACTAGACATATTGAAGGAAAAGCTCTTATTACTACA  
CCACAGGAGATACAAAATGTCATGATTTGATACAAGAAAATGGGTCAAAAAATCGTTAACGAAAAGTTTCCAGATGAACC  
CGAAAACGAAGCAGGTTGTGGCTTCGTGAGGATATAACTCGTGCTCTAAGTCATGATCAGGGAACAGAAGCAATTAAG  
GGATAATGATGGATTTGGATGAGGAGGGAGAATCACATTTAAATGCCAAAGCCTTTTTTTCAATGACAAAATCTAAGAATA  
TTGAAATTGACAATGTTCTCTTAGTGAAGAAAATGAAATATCTGTCTGATCAACTAAGGTTTCTCAATTGGCATGGTTA  
CCCTTTAAAGACCTTACCATCAAAATTTAATCCCAAAATCTATTGGAGCTTGAGTTGCCAAAATAGCTCTATTACCATC  
TTTGGACTGCTTCAAAGGTACATCAAAAACAACAGTAGTAATTA

>Cucs.237470

ATGCTACTAATTAACATATGCATCCAACGCTTGCACATACTTGTATCAATTGGAAGTCTTATTACAACATAAAAAGAGAGA  
TGTACTTTCATCAACTAAATTTAGAGATAAAGTGTAGAAATACAAGGTGGAGTTACTTTCTCGTGAAAGTCTTACTCAC  
TGTTTAGCAAGAATGCATTTGGAGGTGGCCCTTCCGATAAAGATGAACCTTGTAAATGAAATTTGTGAAAAGGTTGGAAGA  
CTTCCATTAGCTTTGAAAACCATTGGCTCCTATTTGCATAATAAGGAGTTGGATGTGTGGAATGAAACATTTGAAGAGACT  
AGATGGAGTGGAGCAAGACTTCTGTGATACAGTATTGCAGAAA

>Cucs.237480

ATGGGGAAGCAGACTAATCATAAGCTAGTACTTGTCTCACAAAAGTGTAGTTAGTTGGAATGGAGAATCAAGTGGAGAAAGC  
TTGTAATCTCCTAGATTTAGAACGATCCAAGAACATACTTTTTGTGGGGATTTTTGGGTCAAGTGGCATTGGTAAAACAA  
CCATTGCTGAAGTTGTTTACAACACAATTTAGATGAATTTCAAAGTGGTTATTTTTCTCTACCTTTCTTCAAAGCAAAAC  
AGTTCAGTCCCACCTCAGCATCAAATGCTTTCTCATCTCAATCAAAGAAACTAAAATCTGGGATGAAGATCATGGAGC  
ACAACATGATTAAGCATCACATGATTCATGAAAAGAAAACCAATTTCAAAGTTAGTTGGAAGTCCGAACCTGGTTTGCACCTG  
GAAGCAGAGTTATTATTACAGCTAGAAAATAGAGATGTTTGCATGAACCTCAATTTAGAGATCAAGTGCAGAATACAAG  
GTGGAGTTACTTTCTCGTGAGAGAGCTTACTCACTGTTTTGCGAGAATGCATTTGGAGATGGCGGCCATCTGATAAAAA  
GGATCTTTGTAGTGAATTTGGAAAAGGTTGAAAGACTTCCATTAGCTTTGAGAACCATTGGTTTCTTATTGATAATA  
AGGACTTGGATGTATGGAATGAAACATGGAGAGACTAGATGAA

>Cucs.237530

ATGGGGAAGCAGACTGATAATAAGCTAGTACTTTCTCACAAAAGTCTTAGTTGGAATGGAGAATCAAGTGAAGAAAGT  
TTGTAATCTCCTAGATTTAGAACGATCCAAGGACATACTTTTGTGGGGATATTTGGATCAAGTGGCATTGGTAAAAACAA  
CCATTGCTGAAGTTGTTTACAACACAATTATAGATGAATTCAAAAGTGGTGTGTTTCTTTACCTTTCTCAAAGCAAAAC  
AGTTTGGTCCCACTTCAGCATCAAATTCCTTCTCATCTTCTATCAAAGAAACTAAAATTTGGGACGAAGATCATGGAGC  
ACAACCTGATTAAGCATCACATGAGTAATAGAAAAGTTGTTATGTTCTTGACGGAGTTGATGAAAGAAACCAAATTGAAA  
AGTTAGTTGGAAGTCCGAATTTGGTTTGCACCCGGAAGCAGAGTTATTATTACGGCTACAAATAGAGATGTTCTGCATCAA  
CTCAATTATAGAGATCAAGTGAAGAATACAAGGTGGAGTTACTTTCCCGGAGAGTGCTTACTCACTGTTTGTGCAAGAA  
TGCATTTGGAGATGGCCCATCTGATAAAAATGATCTCTGCAGTGAAATTTGGAAAAGGTTGGAAGACTTCCATTAGCTT  
TGAGAACCATTGGTTCCTATTTGCATAATAAGGACTTTGGATGTATGGAATGAAACACTGAAGAGACTAGATGAAGAGGAA  
CAAAATTACTTTGATACAATATTGAAGAGAAAT

>Cucs.239860

ATGGCCGAATTTATAATAAATGTTGCGTCAGTAATTGTAACCAATAGGAAAGTATGTG  
ATTAACCAATTGGAAATCAACTTGGTTACATTGTTTTCTACAACAGAAACAAGAATGAG  
ATTAAGAGCAACTTGAAAGTCTTGAGACTACTAAAAGGATTTGGATCTAAGGGTTGAA  
GATGCAAAAAGCAAGGCATATACCATCTTTACGAAAGTTTTCAGAGTGGTGGTTCGCTGCG  
GATGACGAAAATAAAGAAATCTGATGAGCTATTCATTTCCAAACCCACTTGCCTTAACCTT  
CTCCAACGACACAACTAAGTAGAAAAGGCAAGGAAGAGGGCGACGGATATCCGCCGACTC  
AAAGACGGAGGAAACAACCTTCTGGAAGTTGGTTGTCTTCCCTTTACCGGATACTATG  
AATACTATTGTTCTGAAGCTTATCAAACCTTAGGATCAAAAACCTCAATGGCCAAGCAA  
ATTAAGGACGCCCTTGCAAAACCTGAGGTAAAGAAAGGTTGGAATCTATGGTATGGGAGGT  
GTTGGA AAAACATATTTGCTCAAGGAAGTTAAGAAATTTGGTGTGGAAGAAAAATTTGTTT  
GATCTAGTGATGTGACTGTAGGTCAATCTAATGATGTAATGAATATGCAACAACAA  
ATTTGGAGACTTCCCTCAATAAAGAATTTGCCAAAGAGTAAGGAGGGAAGAACATCCTTTCTA  
CGAAATGCATTGGTGGAAATGAAAGGTAATATCCTGATCACATTCGATGATTTATGGAAT  
GAATTTGATATCATAAACGATGTTGGAATTCGTTAAGTAAAGAAGGATGTAAGACACTT  
GTCACAAGTCGTTTTCAAATGTTCTAGCCAATAAAATGAATATAAAAGAGTGTTTTTAAG  
GTGACTTGTCTAGACGATGAAGAGTCTTGGAAAGTTTTTTAAGAAAATTTATGGTGATGAG  
TTTGATGCAAAAATGGAAAACATTTGCAAAAGGAGTGGCCAAAACATGTGGAGGATTACCA  
CTTGACATTTGATATCATTTGCAAAAACATTAAGAGATCAAGACATATAAATTTATTATTGG  
GAGGGAGTGTAAAGTAAAGTGTGAAAATTTCAATTCGGTGAATATTGACGTGGGTGAAAAA  
GTTTTATGCTTCACTTAAACTAAGCTATGAACATTTGGATGGAGAAGAAGTCAAATCACTA  
TTTTCTTCTTTGTAGCGTATTTCCAGATGATCATGGGATTTTCAAGTAAACGATCTGCAAATG  
TATGTGATGGGTATGGGACTATTGAAAATGGTAAATACCTTGAAGGAAGCAAGAGCTGAA  
GCACATTACTTGGTTCGAGGATCTTACATCATCTTCTTTACTTCAACGACTTAAAGAATAGA  
GATGTTAAAAATGCATGATATAGTTCGTGATGTTGCAATATACATTGGACCAGACTTTAAC  
ATGCTACACTTTACTATGGATATAGTACAAGTAGCAAAGGGCTAGATGAGGATAAATGT  
AGATCTTATCGTGAATCTTTGTAGACTGTAAAGAGTTTTGCAACCTTCTTCCAAACTTG  
AAGCTTCCAAAAC TAGAATTTGTTAATATTAAGTTTTCTTTTGGGGGAAAGATAGAAAT  
ATTTGACATTTATGGATGCATATTTTGAAGGAATGGAAAATCTTAAGGTTTTTGGACATTGAA  
GGAACAAGTTTCCCTTCAACCATTTTGGACACCGTTAAAGAACCTTCCAACGTTATGTATG  
TCATATTGTTGGTGTGAGGATATTGATACAATTTGGGCCTTAAAGCAATTTGAAAATTTTG  
AGGATTAGTAATTTGTAGAGGCATCACAGAATTTCCAACGCTCTATGAGTGAATGAAACAA  
CTTAAGGTATTAGTTGTGTGTCGATTTGCTTCAAGTTGGTGGTGTGATTCACACAACATTTAT  
TCAAGCATGACCAAAATTAGAAGAGTTGGATATACAAGACTGCTTTAAGGAATGGGGAGAA  
GAAGTAAGGTACAAGAACACATGGATTCCAAATGCACAACCTTTCAGAATGAAATGTCCTG  
TCACATCTTTCTATTTTAAAGAGTACGTGTTTTGAAGCTTACCATTCTCTCCGAGGCTTTG  
AGTTTCAAAATGTTGAAAACCTAAGAGAATTTCTTTATTTATGTTGGTACCATGAGCCT  
AAGTTTCATCCTTTTAAATCATGGTTCGAGTTTTGATAAATATGAAAAAATATGTCCTTT  
AATATGAAATCGCAGATTTTTCAGTCAACGGGACGAAACTTAGCATATTTATGAAAGGA  
ACTAAAAGGTTGATGATTTCTAAATGACTCCAAGGTTTTTGCAAATGATATTTTCAAAGCA  
ATTTGAAAATGGTTATCCCTGTTGAAGTGTCTTGAATTCACGATAATTCAGAGACACCA  
CATTTGAGAGGAAATGATTTACATCTTTGAAGAGGTTGGTCTTTGATAGAATGGTGATG  
TTGGAGAGTATTATTCGAGGCATTTCCAAATAAATCCTTTCAACAACTTAAATTCATA  
AAAATAGGAAGGTGCGAGCAGCTAAGGAATTTTTTCCACTCTCTGTTTTTAAAGGGCTT  
TCAAATCTTCGACAGATTTGAGATCTATGAATGTAATATGATGGAGGAGATTTGATCAATA  
GAAATTAAGATCAGATACATCTATTTACACTTCTCCTTTGACATCTTTACGCATCGAGCGT  
GTGAATAAACTTACAAGTTTTTGCAGTACCAAAATCATCCATCCAACAACAATTTGTTCC  
TTATTTGATGAACGACGGGTTTTCAATTTCCGAAATTTGAAGTATTTATCAATTTGGTAGAGCA  
AACAAATTTGGAGATGCTATGGCATAAGAATGGAAGTTCCTTTTCCAAACTTCAAACAATA  
GAGATTAGTGATTTGCAAGGAGTTGAGATGCGTGTTCCTTCAAATATAGCGACGTCACCT  
GTCTTTTATAGATACATTTGAAAATCTATGGTTGTGAGTTATTGGAATGATATTTGAAAT

GAAAAGCAGAAAGACTTCGGGAGATACAAAAGTAGTGCCATTGAGATACTTATCTTTAGGA  
TTTCTAAAAAATTTAAAGTACGTGTGGGACAAAAGATGTTGACGATGTTGTGGCATTTC  
AACCTAAAGAAAAGTTAAGGTTGGTAGATGCCCTAAGTTGAAAATTTTTTCCAGCTTCC  
TTCACCAAAATATATGAAAGAAATGAAGAGTTAGAAATGGTTGAGCCGTTAATTATGAA  
ATATTTCCAGTGGATGAAGCATCAAAGTTAAAAGAGGTTGCATTGTTCCAAAGCTTGGAA  
ACATTGAGAATGAGTTGTAAGCAGGCTGTAAAAGAGAGGTTTTGGGTTATGTCAAAGTTC  
TTCAAACTCAAAGTCTTGAATTGTTGGTTGTGAAGATGGTAAAATGATTAGCTTGCCG  
ATGGAAATGAATGAAGTATTATACAGCATTGAAGAATTGACAATTAGAGGATGCCTCCAG  
CTGGTAGATGTAATTGGAAATGACTATTATATCCAAAGATGTGCAAATTTGAAGAAGTTA  
AAATTGTATAATCTTCCGAAGCTTATGTACGTGTTGAAGAATGAAATCAAATGACTGCA  
ACCACATTTCCAAGTTGGTTATCTTCAAGTAGGTGGTTGCAATGGAATGATAAATTTA  
TTTAGTCCCTTCAAGTGGCAAAGAACTAGCGAATCTCAATCCATTGAAATATATGATTGT  
GGAGAAATGAGAACCGTAGTTGACGACAAAAGCAGAGGAAGAAGAGGAAAATGTTGAAATT  
GTGTTCCAGCAAGCTAACTGGTATGGAATTCATAATTTAGCAGGATTGGAATGTTTTTAC  
CCTGGAAAATGCACACTTGAATCCCCTTATTAGATACGTTGAGGATAAGCAAATGCGAT  
GACATGAAAATCTTTTCATACGGAATAACAAAACACTCCCCTTTGAAAACATCGAGATT  
GGAGAACATAACTCATTGCCAGTATTACCAACACAAGGATAAATGACATTATCCATGCT  
TTTTTCCAAATGAGTTTACTAGTATATGTGGTGTACATACTATACTTAGTAAAAAGAA

>Cucs.248810

ATGGCTGATTTCCATGGACTTTTGTCTGTCGAAGAAATGTTGAAGAATGTGTTGAAGGTTGCAGGGGAGCAAACCTGGCCT  
TGCATGGGGCTTCCAGGAGCATCTCTCCAACCTCCAAAAATGGCTACTCAACGCTCAAGCTTTCTTACGGGATATCAACA  
CCAGAAAACACATCTTCTGTGAGCATCTGGGTGGACCATCTTCCAGTTTCTTGTATTATCAAGCCGAGGATCTATTA  
GACGAAATGTTTATGAACATCTTCGACAAAAAGTCCAAACAACAGAAATGAAGGTGTGTGATTTCTTCTCTTTCTAC  
CGATAATGTTTTGATCTTTTGTCTTGGCATGGCAAAAAAATGATGACCTTGTACAACCTGTAGAAAAGCATTACAATG  
AGGCTGCTCCTTTAGGACTAGTTGGGATTTGAACTGTAAGACCCGAGATCGATGTTATTAGTCAATATCGAGAGACAATT  
TCAGAACTGAAGATCATAAGATTGCGGGGAGGGATGTTGAAGTTGAAAGTATAGTGAACAAGTGATTGATGCTAGCAA  
TAATCAACGTACATCTATCTGCCATTGTTGGTATGGGTGGATTAGGAAAACAACCTTTGGCAAAGTTAGTTTTTAACC  
ATGAGTTGGTTAGACAACGTTTTGATAAACTGTATGGTTTTGTGTCTGAACCATTTATTGTCAACAAGATTTTGCTT  
GATATTTTAAAAAATGTAAGGTTGCCTATATTTCTGATGGAAGGATAGCAAGGAGGTTTTACTTCGTGAACCTCCAAAA  
AGAGATGCTTGGGCAAAGCTATTTTCTTGTCTGACATGTTTGGAAACGAAACTTTTTTCTATGGGATGACTTTGAAAT  
ATTTGTTTGTCAAGATCCTGAAACTTAAACAATAGTATCTTGTGACTACAAGGAGTGTGCTGAAGTTGCAAAAATCATG  
GGAACATGCTCCTAGTCACTTTTAAAGTAAATATCTGATGATCAATGTTGGTCTTTGTTTAAAGAAAGTCAAATGCATA  
TGGACTATCAATGACTTCAAACCTTGGGGATCATTCAAAAAGAGTTGGTCAAAAAAATGGTGGCGTACCATTGGCTGCAC  
GAGTTTTGGGTAGGGCAGTAAAATTTGAAGGAGATGTTGAGAGATGGGAGGAAATGTTGAAAATGTGCTAACAACTCCA  
CTGCAAGAGGAAAATTTGTTTTATCTATATTTAAATTAAGTGTGGATCGTTTACCATCATCTTCAGTAAAGCAGTGT  
TGCATATTTGTTCAATTTTCCCAAAGACTTTGTGTTTGAAAAACAAGAATTGATTCAAATGTGGATGGCCCAAGGTTTT  
TTCACACCAACAAGAAAGTACATAACACAGACATGGAATAAGGATGATGAGGATATATACTTCAACATCTTGTGTCAGT  
TGCTTATTTGAATTCGAAGATGCCAATAAAACAAGGATAAGAGATATGATAGGTGATTATGAAACAAGAGAATAATAA  
GATGCATGATCTTGTACATGATATTGCAATGAAACTTCAAGGTCGTATAAAAGATTTGCATCTAAATCCTAGCAATATAT  
CGAAGAAGGAACTTCAAAGGAGATGATAAATGTTGCAGGCAAGTTACGCACAATTGATTTCAATCAAAGATTCCCTCAC  
AATATAGATCAAACACTTTTGTGATGTTGAGATAAGAACTTTGTTTTGTTGCGTGTGTTTGAAGATATCGGGTGATAAAT  
ACCAAAGTCAATTTGGTCAATTTGAAACACTTGAAGATATCTAGAAATTTTAAAGTATTCAATAGAATTTAAATTTACCAGAT  
CTATTGTTTCACTTACATAATTTGCAAACGCTAAAGTTCGTATACTCAGTATGAGAATTTCCAATGAACTTTACAAAT  
TTGGTAAGTTTAAAGCACTTGGAAATTTAGGGGAAAATGCTGACAAAACACCTCCACATTTAAGTCAATTTGACTCAACTTCA  
AACATTGTCTCATTGTTGTAATCGGATTTGAAGAAGTTTTTAAAGTACTGAATTTGGGTCCATTGAAAAACTTGAAGAAGAT  
GTCTGTGTGTTTTGTGTTTGGAGAAAGTTGAAAGTAAAGAGGAAGCAAAGGGAGCAGATTTGGCAGGAAAGGAGAATTTA  
ATGGCGCTACACTTAGGGTGGTCCATGAATAGAAAAGATAATGATTTGGAAAGTGTGGAAGGACTTCAACCAAACATAAA  
TCTCCAATCATTTGAGAATCACCACCTTTGCTGGAAGACATTTGCCTAACAAATTTTTTGTGAGAATTTAAGAGAGATAC  
ATTTGTCTCATTGTAATAGTTGTGAAAAGCTTCCAATGCTTGGACAACATAACAACCTAAAGGAACTTCAAGATTTGCAGC  
TTTGAAGCCCTCCAAGTTATAGACAACGAGTCTACGGCAATGATCCAAACCAAAGAAGGTTCTTCCCAAAGCTTTGAGAA  
ATTTGAAATCAGTTATATGATCAACTTAGAGCAATGGAAGAAGTAATAACAAATGATGAATCATCAAATGTCACAATTT  
TCCCAATCTCAAGTGTGAAAATATGGGGATGTCCCAAATTTAATAACATTTCAAAGCTTTTGTGAGAAATAATATG  
CAACACCTTGAATCATTGATCTTTTCTGTTGTAACAAATGACAAAACCTCCAGATGGATTACAATTTTGTAGCTCTAT  
TGAAGGGTTGACAATAGACAATGTTCAAATTTGAGCATAAATATGAGAAATAAGCCGAAATTTAGGTATTTAATCATTG  
GTTGTGTAACGCAAAATCTTGAACAACCTTCAACACCTCACTGCCTTACAATTTCTGTCTATTCAACATTTTATGATGCATT  
GAAGCTTTGCCAGAATGTTAGGAACTATGATGTTTGCAAAACCTCAATCTTTGGAATTTGAAAAAATTTGAAAAACT  
GCCTCTACAGAATGCTACGTCTACCAAAATTAATAAATTTGCATGATCTTAATATTTGTTTTATCACCTTCACTTCT  
CATCTCTCTGTGCTTTTTAATTAATTA

>Cucs.249360

AATCTAAAGCGATTACTACGAGTAGCGAAACATCTAGTCGAAATGATTCTCAACTAAGAGAAATTTGAGGAGTCCGGTCTC  
TCATATTTGGTCCGAGGAAATTTGGTAAGACCACCTTTGGCTAAGGATTTGTACAACAAAATTTGCTACCCAATTTGAAAGAT

GCTGCTTTCTACAAGATGTTAGACGAGAAGCTTCAAAGCAATATGGGCTCGTTCAACTACATGAAACCTTACTCTGTGAG  
ATTTTAAAGGAGGATTTGAAGGTTGTCAATTGTGATAAAGGAATTAACATCATAAGAAGTAGACTGTGTTTAAAGAAAGT  
TCTTATAGTTTTTGTATGATGTGGATCATCACAGGCAATTAGAAGCACTAGTTGGTGGAGCTCGATTGGTTTTGGTCGAGGTA  
GTAATAACATTATGTTGACAAGGAATGGACATTTACTTTCTAGCCATGGATTCGATGAAAAGCATAAAAATTCATGAATG  
GATCAAGACCATGCTCTTGTCTTTTTAGCCTTTCAGAAAAGTGTACAAAATTTTGTAAAGGTCTCTCTGTGGCACTCGT  
TGTTTTGGGTTCTTTCCTTCGTGGTAGAGATCAAACAAGATGGAGTTGTATATTAGATGAATTTGAAAACCTCTCTACCAA  
AAGATATTAAGATGTTCTTCAATTAAGTTTTGATGGACTAGAAGACAAAGCAAATGATATTTTTCTTGATATTTCTTTG  
CATGTCATTGACCGTTAGATTTTGGAAATTATGATTCTCATGGATCTTTCACTTATTATGATTGAAAGTGATAGAGTGCA  
AATGCATGGATTAATACAACAAATGGGTTGTAGCATAGTTCGTAATGAATCATCTCAACCTGAAAAGAGGAGTAGGTTGT  
GGTTGGTTCAGGATATTGGGGAGGTATTCGTTAATAAGTCTGTGAGAAAACCTTTACCTAAATTTGAAGCATGTTGATCTT  
AGCTACTCTACTTTATTAGAGAAAATTCGGATTTCTCTGCTGCATCAAACCTTGAAGAATTGTATCTACCAATTCACCAATGCAC  
AAATTTAGGAATGCTAGATAAGTCTATTTTATCTCTCAATAAGCTTACTGTCTTAAACCTTGAAGGTTCTTAAACCTTA  
AAATGCTTTCAAGAGGCTACTTCATGTTAAGTCTCTTAAAGAATTGAGGCCCTTACTATAAGAAGCTTGAGAAAATTT  
CCAGACTTATCTGCAGCATCAAACCTTAAGAGATTGTATCTCCAAGAATGCACAAATTTAAGAGTGATTCATAAATCTGT  
TGGATCTTTGGATAAGCTTGGATTGTTGGACCTTAGTCAATGTACTAACCTAGTAAAGCTTCCAAGCTATCTCAGGTTAA  
AGTCTCTATACACTTTATATCTTTCTGGGTGTTGTAAGCTTGAAAGCTTCCAACAATTTGCTGAAAACATGAAATATTTA  
GAGGAATGTAATTTACTGCCATTTAG

>Cucs.251930

ATGGCTGATTTTATATGGACATTTGCACTGCAAGAGATTTCTCAAGAAGACATTTGCACCTTGCAACCCAACAAATCCGTCT  
GGCCTCCGGTTTCAACCACGACCTCTCTAAACTCCTCCACTCATTGCTCTTCTTGAAGCATTCTTCGCGATGTCGATC  
GAACAAAATCCGACCTACAGTCGGTCAAGATTTGGGTCATAAGCTTCAGGATTTAGTGCATGCTGAAAGTTGTGCTG  
GACGAGCTCTCCTACGAGGACCTTAGGCGAGAAGTGGACGTCATGGAAATTCGAAGAAAAGAGTACGCGATTTCTTTTC  
GTTCTCGAATCCCTTGATGTTTAGGTTGAAAATGGCGCGTAAAATTAGAACCATCACCAAGTTTTGAATGAGATTAAG  
GGGAGGCTAGTGTCTTGGGGCTATTCCCTACAGGGGCGATGATGAAAATAGTGGCTGATAATGGCCATATTCGCGAGACT  
GACTCATTTCTTGATGAATTCGAAGTTGTAGGAAGAAGGGCTGATATATCTAGAATAGTGAACGTTGTTGTTGATAATGC  
CACTCATGAAAGGATCACTGTGATTCCATTTGTGGGAATGGTGGTCTTGGAAAGACAACCTTTGGCAAAGCAGTTTTCA  
ACCATGAGCTTGTGATAGCACATTTTGTGAAACTATTTGGTGTGTGTGACTGCAACTTTTGTGATAAAGAAGATTTTA  
AGAGCAATTTTGAATCTCTAACGAATTTTCCAAGTGGTTGGATAGTAAGGATGCTATACTTAGAAGGCTACAAAAGGA  
GCTGGAAGGGAAAAGGTATTTCTTGTGCTGGATGACGTGTGGAATGAAAATGTTAAACTGTGGAACAATTTCAAGAGTC  
TTCTGCTAAAGATTACAAATAGTATTGGGAACAGAGTCTTGTGACAACCTAGAAGTAGGAAGCTGGAAAAATCATGGAA  
ACATTTCCAGTCACTGATGAGAAAAGTTATCGGATGATGAATGCTGGTCAATATTCGAAGAAAAGAGCATTCGCGAAATGG  
ATTACCCTGACTCCAGAATTTGAAGTTATTAAGAATGTGCTTGCAGAGCAGTTTGGAGGCATTCCATTGGTTGCAAAAG  
TTTTGGGAGGGGCTGTACAAATTAAGAAAAGAACAGAGACTTGGTGTGATGTCAACATTTGAAAACCTTATAATGAATCCA  
CTTCAAAATGAAAATGACGTTTCATCTATTTTGTGATTAAGCGTGGATCATCTGCCAAACTCATCATTGAAAACATGCTT  
TGCCTACTTTTCTAATTTTCCCAAGGGTTTTAACTTTGAAAAGGAACAACCTAATCCAATTTTGGATGGCAGAAGGGTTCA  
TTCAACCTTCTGATAAAGTAAACCCGAAACCATGGAAGATATAGGAGATAAAACTTCAATATCTTGTGCTGGCTCGTTCC  
TTATTTCAAGATATTGTTAAAGATGAGAATGGTAAAATACACACTGTAAGATGCATCTTCTACATGACTTTGCTTTA  
TTCTGTCTCAAAATGTGAAGCACTGGGTTCGAATCTTAATGGTCTGGTTGATGATGTTCTCAAAATTCGACGATTATCCC  
TGATTGGCTGCGAGCAAAATGTAACGTTGCCCTTAGAAGGAGCATGGTGAAGTTGCGTTCTCTATTTTTGGATAGAGAT  
GTGTTTGGCCACAAGATTTTAGATTTCAAGCGTTTGGCGTGTCTGAACATGTCCCTATGTGAAATCCAAAACCTTACCAAC  
TTCAATCGGAAGGTTAAAGCATCTAAGGTATCTTGTGATGCTCAAATAATATGATAAAGAACTTCCAAAATCTATTGTTA  
AGCTTTATAAATTCAGACCCCTGAGGCTGGGTTGTTTCCGTGGAGAAGCCCCAAAAAATTCATAAAATTTGATCAGCTTG  
AGACATTTCTATATGAATGTTAAAGACCAACAACCTAGGCATGCCTTCGTATTTAGGCAGGTTGGTTGATCTTCAATC  
CTTGCTTTTAAAGAGTTGAAAATTTCTGACTGTCTAGACTAGAAAATTCACCTGATTACTTCTCAACTCTTAGGACATTA  
GAAATTTGATGATGTCAACAACCAATTTTACAGATCACTCTTACAGACTTCAAACCTACTTGGTATTATACACTCTGGCAA  
CCTGAGTGGTTTGCCTGAGGAGTTACGTGGTAATCTGTCACTCTTGGAGGTTTAAAGTTTGGTATTATCTTCACTTGA  
AATCCTTTCCAACTATTCAGTGGCTCACTGATATTTTGAAGGCAAGACCGGATATGACAAAAGTGGACAAAATATTCAA  
TCTCATGGGCTAGAATCGTACACTTCTGTGAATGAATGTCCATTGTTGGGCACTCTGATCTCACATCAACCCAGATAT  
AAAAGCTTTATATAATCTTTCGTCTTTAAACAATTAGTGGCTTGAAGAAATTTGCCAAAAGGATTTCACTGCCTCAATTCGT  
TGAAAAGTTTGTCAATTTGGTGGATTCATGGAGGGTTGATTTTAGGCCCTTTTGGCATCTCAAGTCTCTGAAAATCTT  
GCAATGATAGACTTTATCTTGCAGAAAAGCACACTTCCCTGATGAGCTTCAACACCTAACCTGGCTTAAAGCACTTGAAAAT  
TGTTGGATTTCAAGGCATTTGAATCTCTGCCAGAGTGGTTAGGAAATCTTAACTCATTGAAAAGTTTGCACATTGAGAGTT  
GCAGAAAATTTAGAGAGCTTCCAGAAGCCATGGGTTGCCCTTGCCAAATTTGAGGAAGTGGGAGTTTCAATTTGCCAGAG  
TTGAGGGTTTACCAAGACGAATCAGAATGGCGGAAGATTTCTTACATTTCAAGATTCATATCATTCAATTTATTTGGGTTGA  
TGAGGACCAACAAAGGATTCAGTTCAAAGTTTGGCACAACCTAGCTAA



>Cucs.252030

ATGGCGGGTTCAACCGGGCTAATTCTTCTTCCAATTCTTCTCTGCTCCTCCTCCCCAAAAATCCTCCTAGCAAAGCC  
TGGTCTCGTCCCCTGGGCGGACTATTAACCTAAGATTGGAGCTGGCGCGGCGGACGACGAACCAACATCCATTTCGCT  
CCCGTCTCCCTTCTTGGATCCCTTAATCTTCTCTCCGATTCATGGGATCTCCACATTGACCGTTTCCCTCCCTTTTTTG  
ACTGAGAATACGGAGTTCAGGTGGTGGGATAAATGGTCCACCGGGAGTTGGTAAGTCGACGATTATGAATGAGATTTA  
TGGCTACGATGGAAGCTCTCCAGGTATGCTACCACCATTTCCAATACTATCTGAAGATGTTAGAGCAATGGCTAGGCATT  
GTACATTGGGTATTGAGCCTCGAATTTCTTCTGAGAGGATTATACTTCTGGATACTCAGCCTGTGTTTTCAGTCTTTCGGTT  
TTAGCTGAAATATGAGACCGGATGGTTCGTCCTACTGTTTCAGTTATTAATGGAGAATCTCCATCTGCTGAATTGGCTCA  
TGAATCATGAGTATCCAGCTGGGCATTTCTTTAGCGTCCATTTGCAACATTTGTTCTTGTGATATCAGAGGGAGTTTCATG  
ATCTAAATATGTGGCATTGATGTTAACTGTTGACTTGCCTAAACATGGCTTGCCTGACCCATCTTCTCCTATTTCTTCT  
CACGCACAAAATCTAATGTAGCATCTGAGAAGGAATACAAAGAAAAAATCTTACAAGTGAAGAATATATGGCAACTCC  
CATCTTTGTTTCATGCCAAAGTCAGGATCGAGATCTTGTTCACAAAATATCTTGCAACTGAAGAGAGCATTTGCCTACT  
ATTTTAAAACCTCTTCATTTATGGGAGACAAAATTTGAAAAAGTTCATAGTGAGCAACTACTCTCCTCTGTGGTTCCCTGAT  
ACCAGGAATTTAGATGTAGATGGTGAAGATAGAAGGTTGCTTCTCATCCCAAACCGGAACAAGGATGACTCTACCAGAGG  
TCAATACGAAAAGTTTTAACTTAGCTCTATGGAAGCTGAGGGATCAGGTTCTATCCATGAATGGTGCATCGTTCCTCAAGAA  
CTGTTTCGGAACGTGATTGGTTAAAAAATCTGTGAAGATATGGGAATCAGTGAAGAGCTCTCCTATTGTAATGGAGTAT  
GCCAGAACGCTTCAATCTTCAGGTATGTTTCAGGAGATAG

>Cucs.275630

CAATCATCATCGTCTTGTCTTCAAATTTGAAATGGAGTTATGATGTGTTTTTGTAGTTTCAGAGGTGAGGATACTCGAAA  
CAACTTCTAGTATCTTACAGGGCTTTCGCTGAAAAGGGTGTCAATTTCTTTCATAGATGACAAGCTAGAGAGGGGTG  
GTCAAATTTCTGAATCCCTTCTCAAATCTATTGATGGTTCAAAAATTTCCATCATTATTTCTCCAAAAATATGATCT  
TCCACCTGGTGTGGATGAACTGGTGAATAAGTTCAGTGCATGAAATCCATGGGACATATAGTTTTCTCTGTCTTCTA  
CAAGGTGGATCCATCTGAGGTTTCGAAAACAACTGGTGGGTTTGGTGAAGCATTTGGCCAAACATGAAGCTAATGAGTTAA  
TGACCAACAAGGTTCAACCATGGAAGGAGGCTTTGACCACTGCTGCTTCTTGTCTGGTTGGGATTTAGCAACTAGGAAG  
AATGAGGCTGATCTTATTCATGACCTTGTAAAGGAGGTTGTCTATATTAATCAAACACAACACTACTACATGTAGCCAA  
GCATCCAGTTGGAATGATTCTCAACTTAGAGCTGTTGAGGAATTTGGCCTCCCATGATGTGCCGATGGTGTAAACATGG  
TGGGGATACATGGGATGGGAGGCATTTGGTAAAGACCCTCTGGCCAAAGCTTTATACAACAAAATCGCTTATCAATTTGAA  
GCTTGTGTCTTCTTTCGAATGTTAGAGAAAACCTTAGAGCAATTCAAAGACCTGGTTCAACTACAAGAAAAACTACTCAG  
TGAGATCTTAAAAGATAATGCTTGAAGGTGGCAACGTTCAATAAGGAAAAGAATATCATTAGGGATCGGTTATGCTCAA  
AGAAAGTCTTATCATTCTTGTATGTGGATAAAGGATGAACAATTAGACGCACTAGTTGGTGAACGTGATTGGTTTCGGT  
CGAGGAAGTAAAATCATAGCAACAACAAGAGATCGACATTTACTAGAAAACCATTCATTTGATATAGTATATCCTATTCA  
GTTGTTGGATCCTAAGAAAATCCCTTGAAGCTTTTTCAGCCTGCATGCTTTTAAAGCAAAATCATCCCTCAAGTAATATGTAG  
ACCTTTTCAAATTTGCTGTAAGTATTGCAAGGCTTTCCTATTGGCTCTTGTATTTTGGGTTCTCTTCTCCATAAGAGA  
GAGCGAAAAATATGGAAGTAAATACATGAACCTGAAAATTCCTCGAACCAAGTGTGAAGCTGTTTTTCAAATAGG  
TTTTAAGGAGCTTACGAAAGAGTGAAGGAGATTTTTCTTGAATTTCTTGTCTTTTTCGTTGGGAGAGGATATTAACATA  
GTAAGGATGTGTTAAAGGCATGTGATCTCAATCCAGACTTGAATATAAATCTTATGGATCTTTCCCTTGTACTGTT  
GAAGATGGAAGATACAAAATGCATGATTTAATACAACAATGGGTCAAAACAATTTGTTCCGATGAATCTTTTGGCCTGC  
AAAAAGGAGTAGGTTGTGGGAGGCAGAAGGAGCTATCAAGATATTGAAAGAGAAAATCTGTGAGTGACTTTAGACAATGTT  
TTTATTTACTTATTGCCAAAGATATATACTCAGAAGCATTGAAACATGAAAATCTTAGATTGCTTATCCTTCAAAGA  
GTAGCATACTTCCCTAGAAAATATATTTGAGTATTTACCTAATTCGTTGAAGTGGATTGAGTGGTCTACATTTTATGTTAA  
CCAGTCTTTCGTCATAAGTTTTTCTGAACTCCCAACTTCTTTGCGACATTAACCTTGAGAAAATATATCTTAGGGGAT  
GCACGAGTTTGAAGGAATGCGACCCTCTTTTAGAAGTTTCCAAGCCACCTGAAGTTCAAATCTCTTAAAGTTCTGAAT  
CTACGGGATTTGCTAAATCTTGAAGAAATTAAGTCTTCAATGGCATCAAACCTTGAGATATTAGATCTCAACTTTG  
CTTCTCTTTAAGAATAATTCACGAGTCTATTGGGTCTCTTGATAAATTTATCACCTTACAACCTCGATTTATGCCATAACC  
TAGAAAAGCTTCCCTAGCAGCCTGAAGTTGAAGTCTCTTGAATCTTTGAGTTTCACTAATTGTTACAAGCTTGAACAACCT  
CCAGAATTTGATGAAAACATGAAATCTTTAAGGGTGTGAAATTTGAACGGTACAGCCATAAGGGTGTACCTTCATCAAT  
TGGATATCTTATTGGGCTCGAGAATTTAAACCTTAATGATTTGTGCAACCTGACTGCCCTTCCAAATGAAATTCATTGGC  
TAAAAGTCTCGAGGAACCTCATCTTCGCGGGTGTCTAACTCGACATGTTTCCCCGAGATCAAGCTTAAATTTTTCC  
CAAGAAGCTCATATTTCAAGCTGACGGTATTGGATCTCAAAAATGTAATATATCAAATCTGATTTCCCTCGAACAT  
ATCTAATGTCTGCATTTCTTGGAGAAGCTAAATTTGTTCAGGAAACAAATTTCTTGTCTACCTCTCTCCAAAATTTTA  
AGTCATTAAGGTTTCTTGAATTAAGGAATTGCAAGTTTCTTCAAATATAATAAAGCTTCCCATCATTTAGCTCGGGTG  
AATGCCAGTGGTAGCGAATTTGTTGGCTATACGTCCTGATTGCATTGCTGATATGATATACTTGCACGCCAATGATCGACA  
CCACATCAAAGTCTTGTTCCTCAACACAACATCAAAAATTTGTATCGAAAAGATTTAAAAGTGAAGATGTTATATGAGAA  
CCCAAGGAGTCTATATGGTTGATAGACGGTTTTTCATGTATACATAA

>Cucs.277260

ATGGCTGAATTTTTATGGACTTTTGTCTGTTTCAGGAAGTTTTGAAGAAGATTGTGAACTTTGGAGCAGAGCAAATAGTTT  
GGCATGGGTTTGGAGAAGGAGTTGTCCCACTTGAAGAAGTGGTTACTCAAAGCGCAAACAATCTTAGCAGACATTAACA  
CAAAGAAATCACACCATCATCTGTTGGGTATGGGTGGAAGAACCTTCATGATATTATCTATGAAGCTGATGATTTGTTA  
GATGAGATTTTATGAACAAATTCGACAACCTGTGGAGCAAACCTGGTAAACTTAGAAAGGTACGTGATTTCTATCTCACC  
ATCCAAAATTCCTTTTTTGTGGTCTCAAGATGGCCAAGAAAATGAAGAAGATTACCAAACCTTTATACGAACATTACT

GTGAGGCAAGTCCCTTAGGACTAGTTGGTGTGATGAATCCCCACAGAATCAGAGGCTGCACTTAATCAGATTCGGGAGACA  
ACCTCAATTCCTGACTTTGAAGTTGAAGGAAGGGAAGCTGAAGTCTTGGAGATACTAAAAATGGTGATTGACTCTACCGA  
TGAAGATCATATCTCTGTGATATCCATTGTTGGAATGGGTGGTCTTGGAAAAACAACCTTGGCCAAGATGGTTTTCAATC  
ATGATGCCATTAAGGACATTTTGATAAACTGTATGGGTTTGTGTGCTAAACCATTATTTGTGATGAAAATTTGGAA  
GCAATCTTTCAAGGTTTAAACGAATACTAGTAGTGGTTTGAACCTCAGGGAGGCCTTGCCTAATCGACTCCGAGAGGAGAT  
GCAAGGAAAAAAGTATTTCTTGTGCTTGACGATGTTTGGGATAAAGAGAATTGCTTGTGGGACGAGCTTATTGGCAATT  
TGAAATATATTTGCTGGAAAACTGGAAATAGTATTATGGTGACCACAAGGAGTGTAGAAGTAGCGACCATGGTGAAGACA  
GTTCCCATTTATCATCTAAAAAATTATCGGATGATCATTGTTGGGCGTTTAAAAAAAAGTGCAAATGCAAATCAGCT  
GCAGATGAATTCAAAGTTGGAGAATACGAAAAATATTTTGGTTAGAAAAATTTGGTGGTGTACCACCTCATTCAAAAAGTTT  
TAGGTGGGGCAGTAAAGTTTGAAGAAGGTGGGTCTGAGAGTTGGATGGCAAAAATGAAAGCTTGGCGAGAAAATTTTCA  
ATAGAGGACAAAAGATTTTGTCTTCCATATTAATAATTAAGTGTAGAGTCTCTCCCTCATCTCGATTGAAGCAATGTTT  
TGCTTACTGCTCAAATTTTCTCAAGATTATGAATTTGATTAAGATGAAGCAATCCAAATGTGGATAGCCGAAGGATTTA  
TTCAACCCGAACAAGAAAGAGAAAACTTGACAATGGAGAACATAGGAGAAGAGTATCTTAACTTTTTATTGTCTCGCTCC  
TTATTTGAAGATGCCATTAATATGATGGAAGAATTGTCACCTTTAAGATTCATGATCTAATGCATGATATTGCTTGTGC  
AATTTCAAATCATCATAAGATGGACTCAAATCCTATTAGTTGGAATGGAAAAAGTACAAGAAAGTTGCGCACATTAATTT  
GCGAGAATGAAGAAGCTTTTCATAAAAATTCAGACTGACATTATTTGTTTTCGCTGTGTTAGTCTTAAAATGGTTTGACACT  
AATACCTTGTGCACTATTATGGCGAAATTGATACATTTGAGATATCTTGATATTTCAAACGTAAATATAAACAAGCTTCT  
TCGAGTCTTATTTGTGCTTATAAATTTACAACCGCTAAAACCTGGATATATTGAATGTGATCTGCCGAAGAATTTGA  
GGAACCTTGGTTAATTTGAGACATTTAGAATTTAAGAAATTTTGTATATGGGACAAATGCCTTACATATGGGCAACATG  
ATTATCTTCAAACACTATCTGAGTTTGTAGTTGGACTTGAGAAGGGTTGTAATAATGATGAGCTTGGACCGTTAAAAGA  
CCTCAAAGGTACACTAATCTTAAAAATCTACAAAATGTGCAAAAATAAAGACGAGGCTATGGCTGCAAAAATGGTGGAAA  
AGAAGTATTTACGTATCTAATCTTTCAATGGTTTCTAAATCTTTATGATAGAGGAGAATATGATGAAGATGATAACAAA  
CAAGTGTGGAAAGGACTTCAGCCACACAAAAACGTACAGTCAATTGGACATTAGAGGCTTCCAAGGAAGAGTTTTGAATAA  
TAATATTTTGTGAAAATTTAGTTGAGATACGTTTGGTTGATTGTGGAAGATGTGAAGTGCTTCCATGCTTGGACAGT  
TGCCCAACTTGAAGAAACTTGAGATTATTTCAATGAACAGTGTGAGAAGTATAGGCAGTGAAGTCTATGGAGTTGACTGT  
AACGACAGAAATCTTCTGCTTTTCTCAGCTGAACAAATTTTCATATTTGTGGGTTGAAGAAGCTACAACAATGGGATGA  
AGCAACGGTTTTTGCATCAAATCGCTTTGGATGTCTAAAAGAACTTATCTTTCTGGATGTCATCAATGGCAAAAATGC  
CAAGTGGGTTAGAAGGGTGTACTCCATTGAATATTTGGCCATCGATGGGTGTCTAATTTAATGCTAAAATGTGCAAAAAT  
TTGTACAACCTGTATCATTTAGACATTCGTTGGGTTGAAAAGATTGCCAGATGAATTTGGTAAAGCTCACTAACTTGAAAA  
ATTGAGAATTTGGTGGATGTATGCAAACTATGAATTTAGTCCCTTCATACATTTATCTTCTCAGCTTGTGAACTTGAGT  
TGACTGATGATGGGTCAAGTGGTAGTGAACAACCACTTCCCAACAACCTCAGCATCTGACCAACTGAAAGGTTTTG  
AAGATTGCAGATTTTGTGATGACATTGAAGTTCTACCAGAATGGTTGGGAAACCTTACATGTTTGGCAACATGGTTTTCT  
CGAATGCAAAAATTTGAAAGAGTTACCTTCGAGAGAGGCCATAACAACGATTAACCAAATTAGATGATTTGGTGTGATCGATG  
GATGTCCCAACTACTACTAGGGGAAGGCGATCAGGAGAGGGCTAAACTTCTCATCTCCCATCAAATGTGGTTTGGGA  
TTGAAGAGTGTATGATAAACTTGTGGCCAAAAAATCATTTTAA

>Cucs.292710

ATGGGTTCTTCTCAGTTAATGGAGCAGAATCATCATCGTCTTGTCTTCAAATTCGAAG  
TGGAGTTATGATGTGTTTTTGTAGTTTTAGAGGAGAGGATACTCGAGACAAGTTCATCAGT  
CATCTTGATTTGGCCTTACGTCGAGAGGGTGTCAATTTCTTCATAGATGACAAGCTAGAT  
AGGGGTAACAATAATTTCTAAATCTTCTTCAAATCTATAGAGGGGTCTAGGATTTCCATC  
ATTATTTTCTCCAAAATTTATGCATCTTCCACTTGGTGTGGATGAAGTGGTGAATAA  
ATTGAGTGTATGAGATCCAAGAAACAACAGTTCTGCCAGTCTTCTACAATGTTAGTCCG  
TCTGAGTTGTAACAACAACCTGGTATTTTGGTGAAGCGTTTGGCAAATAATGAACAAT  
CCGTTAATGACCAACAAGATTCAACCATGGAAGGAGGCTTTGACCACTGCTGCTACTTTG  
TCTGGTTGGGATCTTGGAAATTTATGGAAGAATAATGAAGCTCATCTTATTCAAGACCTT  
GTTAAGAAGGTGTCTATATTTAAAACAACAATTACTAAATGTAGCCAAGCATCCTGTT  
GCAATCGATTCCTCAACTTAAAGCTATTGAGGAATTAGCCTCCCATGGTGTGTCAGATAAT  
GGTGTAAACATGGTGGGGATACATGGGATGGGAGGCATTGGTAAGACAACCTTTGGCCAAA  
GCTTTATACAACAATACTTATCAATTTGAAGCTTGTGCTTTCTTTCAAATGTTAGA  
GAACTTCAGAGCAATTCACGGCCTAGTTCAACTGCAAGAAAAATTAATCAATGAGATC  
TTCAAGGATAATAAAGTTGAAGGTTGACAATGTGGACAAAGGAATGAATATCATAAAGGAT  
CGATTGTGCTCAAGGAAAGTTCTTATGGTTTTGGATGACGTGGATAAAGGACGATCAACTA  
GATGCATTTGGTAGGTGGACGTGATTGGTTCGGTTCGAGGTAGCAAAAATCATGTCACAACA  
AGAGATAGACATTTACTCGAAACATATTTCAATTTGATAAAAATACATCCTATTCATTTGTTG  
GATTGTGATAAATCTCTTGAGCTTTTTTGTGGCATGCTTTTAAAGCAAAGCCATCCATCA  
AGGAATTTATTCGGAATCCAGAATAGTACGTTATTGCAACGGTCTTCTCTAGCTCTT  
GTTATTTTGGGCTCTCTCTTTGTAAAGAGAGATCAAATAATATGAAAAAGCAAATTAGAT  
GAACTTAAAAACTTCCCGAACCAGGTATTGAAGCTGTTTTCCAGATAAGTTTTAAGAGG  
CTTCCAGAAAACCCCGTAAAGGAAATTTTCTTGGATATTTGTTGTTTTTTTGTGGGA  
GAGGATGTTAGCTATAGTAAGAATGTGTTAAAGGCATGTGATCCTTATCTAGAATCAAGA  
ATTATAATTCATGATCTTTCTTGTACGGTTGAAGACGGCAAGATACAAATGCAT  
GATTTAATTCGACAAATGGGTCAGATGATTGTACGTGCTAAATCTTTTAAAGCCAGAAAA

AGGAGTAGGCTGTGGGTGGCAAAGAAGCTGTCAAGATGTTGATAGAAAAATCAGGAACT  
CATAAAGTTAAAGCCATAAAGCTAGACTTGCACAACAACGGTTCACTGATGTTGAAGCA  
GAAGCATTTAGAAACATGGAAAATCTTAGATTGCTTATTTCTTCAAAATGCAGCAAAATG  
CCTACAAATATATTCAAGTATTTACCTAATATTAAGTGGATTGAGTACTCATCATCTAGT  
GTTTCGATGGTATTTCCCTATAAGCTTTGGTGTGAATGGCGGGCTAGTTGGACTAGTCATA  
AATGGTGTATCCAACAAACATCCAGGGATTATATTTGAGGATTGCAAAATGTTGAAGCAT  
GTTGATCTGAGTTATTGGCGGTATTAGAGGAAACCCCTGACTTCTCTGCAGCATTAAAC  
CTTGAAAAATTATATCTTTTAAAGTTGCAACGTTTAAAAATGATTCATGGATCTGTTGCT  
TCTCTTAGTAAGCTTGTACCTTGGACCTCGAAGGCTGTGAAAATCTAGAAAAGCTTCCA  
AGTAGCTTCCATGTTAAAGTCTCTTGAAGTTTGAATCTAAGTGGATGCATAAAGCTA  
AAAGAAATTCCTGACTTATCGGCATCGTCAAACCTTAAAGAACTACATCTTAGAGAATGC  
TATCACTTGAGAATAATTCAGACTCTGCAGTTGGACGCTTCTTGATAAACTTGTATC  
CTGGACCTTGAAGGATGTAAAATTCTTGAAGGCTTCCAAGATACATCAGCAACTCAAAG  
TCTATTGAAGTTATGAATCTTGATTTCATGCCGAAAGATCGAACAACCTTTTGCACACTAT  
TTTGAAGGTTTCCAAGCCACTCAAGTTCGAATCTCTTAAAGTTTTGAATCTTAGTTAT  
TGTCAAAATCTTAAAGAAATTAAGTACTGACTTTTCAATTGCATCAAACCTTGAGATATTTGAT  
CTTAGGGGCTGCTTCTCTTAAAGAACGATTACAAGTCTGTTGGATCTCTCGATCAACTT  
ATTGCCTTAAAACCTTACTTATTTTGGCATCAACTTGAAGAGCTTCCTAGTTGCCTCAGATTG  
AAGTCTCTTGATTCTTTGAGTCTCACTAAGTGTATAAGATTGAACAACCTTCCAGAATTT  
GATGAAAATATGAAGTCTTTGAGGGAGATGAATTTGAAAGGTACAGCCATAAGGAAGTTA  
CCCACATCAATTAGATATCTTATTGGGCTTGAGAATTTGATCCTTAGTTATGCACAAAC  
CTGATTTCTCTTCCAAGTGAATTCATTTGTTAAAGAGTCTTAAAGAACTTGATCTTCGA  
GAGTGTCTAGACTCGACATGCTTCCCTCGGGATCAAGCTTAAACTTTCCCAACGAAGC  
TTATGTTCAAACCTGACTATATTTGGATCTACAAAATTGCAACATATCAAATTCAGATTTT  
TTGAAAATTTATCTAATTTCTGCACTACCTTGAAGGAGCTAAATTTGTCCGGAAAACAAA  
TTCTGTTGTCTACCTTCTCTCAAAAATTTTACATCATTGAGGCTTCTTGAACCTAAGAAAT  
TGTAAGTTTCTTCAAAACATTTGTAAGATTCCACATTTGTTTAAAACGAATGGATGCTAGT  
GGTTGCGAATTTGTTGGTAATAAGCCCCGACTACATTGCCGATATGATGTTCAGAAATCAG  
GACCTTAAAGTTAAGGAACCTTCAAAAGAGAGCTAATCGTAACGTACAGCGAGATCCCGAAA  
TTCTGCAACAATCAAACCACAGAACTTATGATGCCTACTATGGAAAGTTGGTGTGGGTC  
AAAATCAGAGCATATGTTGTTACTAAGAACTCCTCCATCACAGTTGATATGCTTGAATGA

>Cucs.303290

ATGGAATGAATATTTGGGACCTAGAGAAAAGTTTGCACGGTTCGAAGCCTTCTTGCTGCGATTTGCTAACTGGCTTCG  
TGCGGAGATGGAGGTTTCATGGGATGAGTTGCTTTGTGTCTGATAGAGCAAAATGTAGAAAATCTCGCAAGCATAGAGTTA  
TTGAGAGGGCAATGGATGCGTCTCGTTTGGAGTCTGATTTCTGACAAAGAAAATCATTTCCAAAATCCTTACACCATTGAG  
GAGCTTCGATTTTTCTCTGGCAAGAAGAACTTTGGTCCCAATATTTTTGATTTGAGCCCAGGAGATTGCTTGGCAGAGA  
CATAGTGGAGAAAGAGGGGAGATTTGTGGGAAAACATGGAGGTTGATTTGTGATTCTGTATGGAGGATTGGAGAAGGA  
GGAAAGAAGCTATTGAGGGCTTTGTCCGGTTCGACGAGTGGAAATTTGAAGCTCAGAATGGTAAGTGGAGGATTGCATT  
CTGAAAGCCGTCATGCTACTTGCAATGAGGTTGGGAAGGCGAAGTGTGTCGAGCATTGACTAAGTGGAGGGAGAAGGT  
AGAGAAAGAAGAGTTTCCCTTCCCGGAAATGAGAATTTTCATAGGCAGGAAGAAAGAAATGTCAGAGCTAGAATTCATAC  
TTTTTGGCAATATAGCTGGTATTCTGAAAGAGATTACTTTGAACTGAAAGCTCGGCCAAGACGAAAAAATTTGACCCTA  
GGCTGGAGTAAAAGTAGTTTCATTAGAAGAGAAAACAGAGGGAGCTACCATTAGAAGTGGCGCAACAAGAAGGTTAAAAGAAC  
TATTGTGTGAAGGATCGAAAAGGAGATCGAAATGCAGAGTATTGAATTTCTCAACGGCATCGGGGACTGAAAACAA  
AAAGTGGTGAAGGATGCAAGAAAAGAAAGAACAGCCAAAATTTGTATGGGAAAAGGCATTGCTTGCATTTCAAGGGAC  
TCCGGAATTTGGTAAGACTGAGCTTCTCTTAGAATTTGCATATAGAAATCACAAAAGTACAAGATGGTATTATGGATTGG  
AGGGCAAGCCGATATATCAGGCAGAATTACCTTAACTTAGGTTCTTCTAGAAAGTTGATGTAGGATTTGAAAATTTCT  
CAGGTAAAAGCAAGATAAAAAATTTTGGAGCAGGAAGAGCAGCCATTTCAAGAATTCGCACAGAGCTGATGAGAAAC  
GTTCCCTTTTTGTTGATAATCGATAATTTAGAGTGTGAAAAGGATTGGTGGGATCACAAAATTTGTGATGGATCTTCTTCC  
TCGTTTTGGTGGAGAGACACATATCATAATATCCACTCGACTTCTCGTGAATGAATTTGGAGCCTCTGAAACTATCTT  
ACCTATCAGGGGCTGAAGCAATGTGTTTAAATGCAAGGAAGCCTTCGAGACTACTCAATGGCGGAGATTGACGTTTTGAGA  
GTCATTGAAGAGAAAGTTGGAAGGCTAACATTTGGGCCTTGAATAATTTGGCGCAATCTTATCTGAGCTTCCCATCACACC  
CACTAGATTGTTGGATACAACCAATAGAATGCCCTTCAAAGATCAATCATGGAGCGGTAGGGAAGCTCATGTATTTCCGGC  
GAAATACCTTCTTATGCAGCTTTTTGAAGTATGTTTCTCTATTTTTCGACCATGCTGACGGGCCACGGAGCTTAGCAACT  
AGAATGGCTCTAGCAAGTGGTGGTTTTGGTCCAGCTGCTATTTCCATTTTCGAGTTAACCTTGCAGCACACAAGATACC  
AGAAAAGCGCAGCGGACGAGGTTGTGGAGAAAAGTTGTTACGTTCCATGGCTTGTGGTTTAACTTATCTTACATTTAAA  
AGTCAGAAGCCGAAGCAACTTCCATGTTGTTAAGGTTTAAATAGGCCAGAAGCAGCACCAAAACAGGGATGCCTACATTT  
AACGATCTAGTCAAGCTATATGCACGCAAGAGAGGGGTGACGGATTTGCCAAGCAATGGTTCAAGCTGTCATGAACCG  
TCCATTCATCATTCACTCAGAACATATATGGGCAGCATGTTTCTTACTGTTTGGGTTTGGTCCGGACCCTGTAGTTG  
TCGAGCTCAAAGTGTCCGAGCTATTATACTTAAATAAAGAAGTGTGTTTTACCGCTTGCCATTAGGACATTTCTCACGTT  
TCTCAGTGCACCCTGCATTAGAATTTCTCCGTTATGCACAAATGCCTAGAAAGCTGCAGACCAAGCCTTCGTTACCCC  
GGTCGAGAAGTGGTTGATAAGTGCCTTTGCTGGAGGCCAATTCAGACAAATGCACAGCTGAATCCTTATCTCTGGCAGG  
AGTTAGCTCTATGTAGAGCAACACTGTTAGAAAACCCGAGCAAGACTAATGCTAAGAGGTGGACAATTCGACATTTGGGGAC

GATCTAATTCGAAAGCGCATCTTTATCAGAACTTCCATATCTGGTGAGGATCATCCAGACACAATATCTGCTCGTGAAC  
TCTCAGTAACTCAATAGGCTTATTGCTAATTTCCATGTTCAATCTTCTCCATAG

>Cucsa.318890

TTAGTTTTCAACCATGAGTTGGTTAGACAACATTTTGATAAACTGTTTGGGTTTGTGTCTCTGAACCATTTATTGTCAA  
CAAGATTTTGTAGATATTTTACAAAATCTAAAAGGCACCATTTCTAATGGAGGGGATAGTAAGGAAGTTTACTTCGTG  
AACTCCAAAAGAAGATGCATGGCCAAAGATATTTTCTGTGCTTGACGATGTTTGAACGAAAATCTTTTCTATGGGAT  
GAGTTGAAATACTGTTTGTCAAGATCCTGAAACTCTAAAATAGTATGTTGTGACTACAAGGAGTGTGAAGTTGC  
AAAAATCATGGGAACATGTTCTGGTCATCTTTTAAAGTAAATATCTGATGATCATTGTTGGTCCTTGTTTAAAGAAAGTG  
CAAAATGCATATGGATTATCAATGACTTCAAACCTTGGAGATCATTCAAAAAGAGTTAGTCAAAAAAATTTGGTGGTATACCA  
TTGGCTGCACGATTTTGGGAAGGCAGTAAAATTTGAAGGAGATGTTGAGAGATGGGAGGAAATGTTGAAAAATGTGTT  
AAGCACTCCACTCAAAGAGGAAAATTTTATTTTGTCTATATTAATAATTAAGTGTGGATCGTCTACCGTCATCTGCATTTAA  
AGCAATGTTTTTCATATTTGTTCAATTTTTTCCCAAGGATTTTGTGTTTGAAAAAACAAGAACTAATTCACATGTGGATGGCA  
CAAGTTTTTCTCAACCACAAGAAGGAAGGAACATGACAAATGAAACTGTAGGAGACATATACTTCAAGATCTTGTGTC  
ACACTGCTTATTTGAAGATGCCATGAAACAAGACAGAGGAATATGAGATACCTGATCTGCTTGAATTTGAAACAAGGC  
CAGAAGAATATAAGATGCATGATCTTGTACATGATATTTGCGATAGAAATTTCAAGAGATCAAAAATTTGCAACTAAATCCT  
AGCAATATATCAAAGAAGGAACCTCAAAGGAGATTAAGGTTGCATGCAAGTTACGCATGGTTGATTTCAATTCGACG  
GATTCCTTGCATATTTGGCAACTAACAATTTTTGATGTTGAGATAAGGAACCTTTGTTTGTGCGGATTTAAAGCAT  
CAACGCTGCCCTAGTGATAAGTTACCGAAGTCAATTTGGTCAATTTGAAACACTTGAGATATCTAGAAATTTGCATGTTATTTA  
GGTAGATTAATAATTTCCAGAGTCTATTGTTTCTTCCATAATTTGCAAACTAAAGTTTCTATACTCATACTGTTGAAAA  
ATTTCCGATGAACTTTACAAAATTTGACATTTGCTCATTGTTGTGATCGGGTTTGAAGAAGTTGTAAAATTTACTGAATTTGG  
GTCCATTGAAAACTTGCAAGGTTGTTTGTGCTTTTGTGTTTGGAGAAAGTTGAAAGCAAAGAGGAAGCCAATGGAACA  
AACTTGGCAGAAAAGGAGAAGTTAAAAGATCTACACTTAAAGTTGGTCCAAATGAAAGAAAAGATAACAACAATTACAATGA  
TTTGAAGTGTGGAAGGACTTCAACCAACCAAAATCTACAATCATTAGGAATCTACAACCTTTGCAGAAAAGACGTTTGC  
CTAACCAAGATTTTTGTTGAAAATTTAAGCGTGATAGGTTTGTATGTTGTAATAATTTGAAAAGCTTCCAATGCTTGGGA  
CAATTAACAACCTAAAGAACTTGAGATTTACAGCTTCCATGGCGTCCAAATATAGACAACGAGTTCTATGGTAATGA  
TCTAACCAAGAAGGTTCTTCCAAAGCTTGAGATATTTGTAATGTGTGATATGATCAACTTAGAGCAATGGAAAGAAG  
TAATGACAAAATGATGCATCATCAAATGTTACAATCTTTTCCAATCTTAAATGCTTGGAAATACGTGGATGTCCCAAATTA  
ACAAAATTTCAAATGGACTACACTTTTTGTAGCTCCATTCGACGTCACCTTCTTTCCCTTAAAAAATTTACTTTAGTCGA  
GGATGAGTTGAGCAACAATAGTGTAAACAAAATTTCTGAACAACCTTCAACACCTCACTGCCTTGGAAATTTCTGTCCATTG  
AAAATTTTGGAGGCAATGAAGCTTTGCCAGAATGGTTAGGAACCTTTGTATGTTTGCAAAACACTCAGTCTTTATAACTGC  
AAAAATTTGAAAAAATGCTTCTACAAAAGCAATGCTACGCTCTACTAAATTAATCAATTTGATGCTTGCAAAATGTCC  
GATGCTACTACTCGAAGAAGGTGATCCAGAGCGAGCAAACTTTCCACTTTCCAACATGTTGGTTACAGCGCAACGGTT  
ATCTGAAGTGTATTTAG

>Cucsa.326910

AAAATACCCATTTTACACCAACTTGATTACCTGTTCCACTACAAGCAAAAATATTAAGGAAGTTGAAAAGAAAGTTGAAGC  
TCTTGGGACTGCAAAAGGGAATGCAGTTTTTGTAGGAGTTTCTAATGGTTGACAATTTGTAAGGATGTATTGGAGATAG  
CACAAACAAAATGAAAACCCCTCATGCTTTAATTTTTGTTGAACGATATCAATTTATCCAGAAAAGCAAAAAAGAGGGTGGAA  
AATATTATTTGAACCTATAAATGAAGGAAATGGATTTAACAAGATAATGTTGGTTATCCCGTACCTTCTCCCGATACTAA  
TTCTCCCACTCTCCCTACCGATTATCAAATTTATCGCGTCAAGAACCTTCAATAGTAGAAGAAAATAAAAGAGGCCTTGCAA  
ACCCTAATGTCGACACAGTTGGAGTATGTGGTATGGGTGGTGTGGAAAACTGCTTTATGAATGAAGTTAAGAAGTTA  
GTGTTGAAAAGAATTTGTTGATCGAGTGAATCAAGTGGAGTTGGTGAATCCAAAAGTGTATTCAATATTAAGAACA  
AATTAAGATGAGTTAAATATGGAATGAAATATAGAATGTGAGGAGTAAAGCATGTCGCCTACGAACCTCATATTTGCCG  
AGAGGAAGAGAAATATGTTTATGTTGATGATATATGAAGGAACACGATGTTGAAAAGAGTTTGAATTTCTTTT  
AAACATGTATTAACAATGAAATGAACACAGAAAAGACATTTGAGGTGAATTTCTTACCACGAAGAGTCTAGGAACCTT  
TTTCGTGACAAATAGTTGGTGTGCTTTCGTGTTGAAAGATGGACATAATATACAACAATAGCAGAGGATGTGGTAAAAG  
AATGTGGAGGTTACCACCTTGCACCTTAAAATTTCTAGGAAAAGCATTGAAGGAAAAGAGTACAGATATGGAAGGATGCG  
TTAAAGTCAATGAAAATCTCTGTTACAGTGAATTTTACAGGAGTGAATGAGCAATTTGATTTCTTGTCTCCAATTCAGTTA  
CGATTCAACAGAAGATGAAGCAGAGCAAGTATTACTTCTATGTAGTGTATTCCAGATGATTACAAGATTGAAGTGAAGG  
ATTTGCAGATGTATGCAATGGGATGGGATTTGGTAAAGCACATAAATACTTGGGAAGATGCAGGGAATAGAGTAATCAAG  
TTGGTTGATGATCTTAAATCTTGCTATTTGCTTCAAGATGACAGTCCAAAGAAAGGATCAGATGATTTGTGTTCAAATGCA  
TGATGTGGTCCACGATTTTGGCAAAATACGTTGCATCAAAGAAAAGATAAGATGACGTCCTTGACGTATAGGAGTGGGCAAA  
GGCTGGAATACTGGCAAGAAGAAGATGATGATATGCATGAATCTTATAAAGCAATTTATGCAGATTTGTGCGAAAATATTGT  
GTATACCTTCCCCAAAAGTTGGAGTTTCCGAACCTTCAATTTGGTAATAAAATTCGAATTCCTACTGCATTTTTTGAAG  
AATGAAAGCGCTTCGAGTTTTGTCTGTGGAACTATGAGTATAAGTTTTGAACCATCAAGTTGGGCATCAATTAACAACC  
TTGAAGCATTATATGAATGATAAACTAAAGGTGCTACACGTTGAAATGCGACGACTTTAATCCGTCGGAGTTTCCCT  
CCAAACATCAATGAAAGTATGACACAACCTGGAAGAGTTGAAATTTGATGGCTTCAAATGAATGAACCTTCCGAATTGAA  
CCGTCTGACACGCTTTTTCAGTTTAGAGTTAAGGATTCAGAAATGTTGAGATCTTGTAAACGAACCTGAGTGTAGAAAAG  
CAGAAAAGTTGGAAGAATTTAGTTTTTGTGTTGATTCCGGTGGGTTTTTACAAACCTTCTTTGCAATAATAACCATACTGTT  
CCATATGGAATTTATAATTTGGTATCCCCGTTTGAAGGAACTTCAAATCTACATTCACAATAATCAAATCAATACTTAGA  
CATGCCACGTTGGGATTGAAAATAACCCATGCATCTTGATCTTCAAGTTGCACAAAATTAACATACGATTTTCCATCACATA  
TGCTTACGTTACTTGTTTCTTAAATACATTAGAAGTACATCATTGTAAGTTAGTAGAAAAGGATTTTGAATTTGAAGAA

TGGAGTGGTAGTGGTGGTGCAGGTGATGTAAACCAAGTACTAGTCCCCTTACAGATCTTACACCTATCTTTTCTACCAAA  
CTTAAAGCATGTTTGAATACCGATCCAAATCCCACAACCTCAGACCTTCTCCCAATGTAAAGAAAGTGGAGATTACA  
AAGTGTCCGACGCTTAA

>Cucs.328080

ATGGCAGAATCCATTCTGTGCAGCCTTGCAGGAAGCATTATTACCAAATGGGTTCTTTCGCACTTCAAGACCTTGGATT  
GTTGTGGGGTTTCCATGATGAACCTTGACAACTGAAAGGCCTGTTTCCGCCCTCGAAGCCGTAATCTCGACGCAGAAG  
AGAAGCAGTCCAAAAGTCTGCAGTGAAGGACTGGATTTTAAAGCTTAAAGATACTTTCTACGACATCGACGATTTGTTG  
GACGTGTTCTCCTATGAATCTTTGAAAAGACAAGTTATGACCAAACATAGAACTAACAAACACCAAAAAAGTACGCATTTT  
CTTCTCAAAATCTAATCAAATTCGATTTGCAATTTGAAAATGAGTCAAAAAATCAAAAGGGTCCGAGAGAAATTAGATGCAA  
TTGCTAATGGATAAAAACCTCAATTCATCTTTATGAGAATACTAGGAAATACAAGATGATGAATCGACGAAACGACTGGAG  
ACTACCTCTTTCATACGTGAAGGAGAAATAATTGGTCGGGATGATGACAAAAAAGTATTATACATTATCTATTGGATAC  
CAACATCCACGAAGATAGTGTGCAGTGTGCGATTATTGGAATGGGAGGATTAGGAAAGACTGCTCTTGTTCATCTA  
TTTATGGTGACGAGAAGGTAAGAAACATTTGAGTTGACAAATGTGGGTGTGTATTTCTGAAGAATTTGATGTCAAAGTA  
ATTATTGAAAAAATTATAGAGTCTCTCACAAAAAGAAACGTTGAGCCTGACCTTCAGCTTGATACGTTGCAAAAGTATGGT  
CCGAGAGAAAAATTGATGGAAAAAGATACTTGCTTGTGATGGATGATGTGTGGAATGTTAATCGTGCAAAATGGATAAGTC  
TAAAAGGTATCTCATGGGTGGAGCTAAGGGAAGTAGGATTTTGTATCACAAACCCGTACTCATCAAGTTGCACAGACTTTT  
GAAAATTTTATCCCATCTTAAAAGAACTAGATGAGAATACTAGGAAATCTTGAATAATTGTTTAGAAAAATGGCAATTTTCCAA  
CGAATCAGAGGTGCTTGAGAAATCAAAGTTGGTTGTAATTTGGTAAGGAGATTGTTACAAAGTTGAAAGGTTCTCCTCTTG  
CAATAAGAGTAATTTGGGAGTTATCTCTATTCAAAAAAGTCAGAAAAGGATTGGTTGTCTTCAAGGACCATGAACTCGAC  
ACAATCATGCAACAAGAAAAATGAGATACAATCGATACTAAAGATCAGTTTTAACCCCTCTCATCTAGTTTGAAGCATTG  
TTTACATATTTGTGCATTATCTCCAAAGATTATCACTATGAAATTCGAAAAAATGATTTGATAAAACAATGGATGGCAC  
AAGGCTTCATTCACCACATAATAAGAAGCAATGGAAGATGTTGGTGATGATTATTTGGAAGAACTACTGGGGAGATCA  
TTTTTTCAAGACATAAGAAAAAACAATGGGGAGAGATCAAGAAGTTCAAGATGCACGACATCATACACGATCTTGCATG  
TTCTGTTGTAGAAAAATGACTGTGTACTTGCATGATGACACTAAGTCCATTGACAAAAAGGACTCGACATGTGTCAATTT  
CGGCCTTCACTCAATGACAAGATGGAACCTCATTACAAATCATTAATAGAGGCAAAGAATTTGAGAACATTGAATTTAT  
GCTCGTCGTCATCACATCGATCTCTAATCATTTGCGGTTACGAACATTGAATTTGGAGTTTCATTTTGTCCCAAGTG  
TATTGGTAAGATGAAACATTGAGATATATTAATATTACTTACTGTTATATGATTTTCTTCCCAAGGCAGTTACAAAAC  
TGTACCATTGGAACACTCATCATTCGTGGATGTCTCGAGCTAAGAGAATTTGCAAGTGATATTAAGAATCTTATCAAT  
CTTAGACATCTAGATATTAAGGATTTTAAACATGGTTGGAGTTATATGCCAAAAGGAATGGGTTCAATGACTACCCTTCA  
AACAATGAATTTGTTTATATTTGGGAGAGAATAAAGGTTGGTGAGTTAAGTGAACCTCAATGGATTGGTCAACTGAGAGGAT  
CATTAAAGTATTCACAATTCAGTTCTGCAAAACCCATTTGTAAGAAATGTTAAATACCTTGAAGAAAAATCCAGAATT  
CAAAAGTTGGAATTACATTGGAAGACCTATCAAAGGAATCTAAAATTTGATGATGAAGATGAGAGAGTTTTGGAGAGCTT  
GAAACCACATTCAAATCTTCAAAAAATACGCATAGAAGGATATAGAGGATTGAAGTTATGTAACCTGGTTCTCATTTGATT  
CTATTGTGAATTTGGTCTTTATAAAGCTTTTCAACTGTGAAAAATTTGCAACAGCTTCCCTCGATTTGATCGATTTCTTTTT  
CTCAAACATCTTCATCTGGAAGATTTACCGAGTATCGAGTATATTTGCTATTAACAATTTATGTTTCTTCAATGACTAC  
TTTCTTTCCATCCCTTGAGAATCTAAGCATCATTAAGTTGCCTAACTTGAAGAATGGTGAAGGGGGAAAGCATTTGATC  
AAAATTTCAATTTTCCAAATTTTACGTCACTTTTCTCAACTAAAGATTCAATTTGTAGACAATTTGGCTTCTATTCCCA  
CAACATGGACCTTTGCAATTCATTGGACATACGTGATATCTAGTTTGAACCTTTTGGAGTTGGTAATCAAAATGACCGCTAC  
GAACATTATTTTCTACCAAATGACTTATTTCTCCAATGTGACACATCTCCAGTCTCTTGTGATAGGACGTTGCTTCAATT  
TAAAATGTCTTTTGTGATGATGATAATGTAAGATGGAAGAAGCTCGGAAGTCTTCGCACACTTCGACTTTGTTTCATCCCC  
AAATTAGAGTATTTGCCTAAGGGTTTCCAAATTTTGAAGCACTCGAACATTTGGAACACTTTTGGTGTGAAAATTTGGC  
ATGTATTTTAGGGATTGAGCATCTCACTTCACTATCACGATTGGAATTTCAAATTTGCTCAATTTAACTTCTTTGCCGG  
AAGGGATGACTCAACTTATTTCAATTAACATGTTTGATAATCGATGATTGTCCCAATTTAAGTACCTTGCCAGAAGGGCTT  
CATCACCTCCTTAATACCCCGAGGTACGCACCACCTAATTTTTTCCCCTAA

>Cucs.337180

ATGGCTTGTTCATCTATGAGCAAGCAGAAAAATATCTTGATAGAGCTAAAAAATTTCCCAATGTACCTGAGACGAATGCA  
GTATACCATGTTGAGCCTTAAAAACAATTTCTAAGGATGCTGAAAAGGAAGAATATCGTCAATGTTCTAAATGATTGGCTAC  
AGAAGCTTCAAAGTGTATTTTACAAATTTAGGAATTTGCTATATGAATCCAATAGGGAAGTCAAAAAACAAGAGGCTACT  
GGAAAATGGGTATTTCTTCTTCTTCTTAACTTCAGTCAAAATGATCAAACTAAAAAATGATGAAACTATGCGACGATTT  
GGATGAAATTCATCCCATATGATGCTTCAATCTAACAAACATGGAGACAACACTCCTTTCTTAGTGTCTATGAAG  
TTTTGCACAAGACTCATGAAACCAAGTTGGCAATTTGCTTTACTCGTTGACTAATGCTCCCAAGGTTTTTCCAAGACAAACGA  
TATCATAACTTTCTGGATCATTTCAAAAAATCTACTCACGGGCTCTTCCACATAGTTGGAGAACCAGGTATAGGTAAGAC  
CACACTTGCCAAATTTCTTTTACAACAATCTGGTGAACACGTTTCCATCAAGATTGTGGATTTGTGTGAAAGAGGAATTTG  
ATCCACAGAGATTGATAAAAGAGATGCTCAGTTTTTTCACATTTGCCAAGTAAACATGTGATAACTTGACTGAGAAAACAATG  
TGCTTTGCAGTTCAACAATTTCTGAGGGATAAAAAATTTCTGATTTGTTTTCAAGATATTTCAATCAAAAACCTTGGTAA  
TTGCTCCATATTTAAAAGTTTATTGGGGATGGGAAACCGTGGCAGCAAAATCATAGTGACCCTCAGAATGAGAAAAATAG  
CTGATGCTGTGCGACTAAAAAACTCTACAAGAACGAGAGCCAGGTAGTTCCATCCCCAGAGCCACAAAACCTTCAGAT  
GTTAACAAGGATAATATGAAACATCAACAATTTTCAAAGTTGAGAGGTTGTCAAAGGAAAAATTCATTTGCTTTGTTCAA  
AGTTTCATGCTTTCACAGAAACACAGGAAGCACAAATCCCAATCTCACAAAAATACAAGAAGTAATTGAGCAGAAATGTC  
ATGGGGTTCTTTGGCAATAAAGTGCCTGGGGGTCTGCTATCAAAAACCTAGTATAGCTGAGTGAACGGTGTCTATCGAT  
AAGTTATGGGAACATGAGGAAGAGGAGGATGGGAATAAGAGTATTTTACCTTACTTAGATTATGCTATGATCAAAATGCC

TTCACACCTACAACGTTGTTTTCTTTATTGTGCCAATTAATAAAGATCGCATATTGTCTTCCAATGATGTGATTCAAT  
TATGGATTGCAAGCGACCTCCTACCCAAAGAGAATTACTTATCTTTGGAAAAAATAGGTGAGAATTATTTCAAGGAACCTA  
TGCTCAAGATGTTTCTACAAGAAGCTAGAGGAATATGGTTTTGGCTATTGGTTTAAATTCACCCCTCTTATTGAAAAACT  
TGCACGCTACTCACACAAAAACAGGTATTCGAAGTCACAAAAACCCAATCTATAGCCTTCAATAAGAGATAAGGTGC  
CCCTAGTGCATTCTAGCAAATGCATGCATCGACAAGTTCAAATACTTAAGACTATTGCATTAGGCAATGCAAAATCTA  
CAGGGAATTCCAAGTGCTGTAGAAAATCTGGTACAGCTCAGATACCTAGACTTGAAGGGAATAAGAAAATCAAGCGGCT  
ACCAAATTCATCTTCAAGCTAAAAAATTTACAACCTTGATTCTTGCATCCTGTTCCGCACTTAAAGAACTGCCAATG  
ATATTAGGCAATTGACCAACCTGAGATACCTCTGGGTAACAGCAAACAACCTTCGTCTGCACAAAAATGGAGTTGGAACC  
ATGACTTCTCTTCGATTTCTCGCAATTGGAGGTTGCAAAAAACTTACACTGACGTTGAAAGGAGTGGAGTTCAGGCTTCA  
GAGGTTCACAATCAGAGAGCTTCCAATAGTGAAAAAATTCGCCGAATGGACTCAAAGATTACCCGAAACCTAAGAGTTT  
TGGAACTCATCGATTGCTCCCATCGAATGGAAATGATGATGTGTTAAAAATCATACAACTACTTGAACGGTTTTCAATTCAT  
GGAGTGTGAGGACAAAAACAGATCGGGGGTACAACATCGATTATCGTAATTTGTTAGGAGTAGGAAAGTCAAGAA  
GGAAGTGAAGACATGTGTCTACTACTAA

>Cucs. 337190

ATGGCTTATTGCATCTATTACCGAGCTGAAAACATCTTGAGTGAAGTGAAGAACTCCCAAACCTACCCAAAGAAATGGA  
GTATACCATGTTGAGTCTTAAATCAATCTTATGGATGCGGAGAGAAGCAAGAACAGAGTCGTGGTCTACAGAATTGGC  
TAGAGAGCTTCAAATGTATTTTCCCAAATGAAGGCTCATAGATGAACACAAAGAGGAAAGCTACGAGGATTTGGT  
AAACAGGTACTTGTCTCTTCTCGTGCTCCAGTAATCAAATAGCACGTAATTTGGAAAATGGAGAACTATTCGACCATTT  
GAATGAAGTTGCGGCAAAAAATGTATGAATTTAATCTTACAGAAAGGCACACTGGTGCATAAAAACGGAGACAACAACT  
CTTTCTTACTGCTACTGAAGTTTCAACAAGACTCATGAAACCAAGCTGGAAGTACTTTACCCCTTAACTAATGCTCCG  
AAGTTTTATCAGGATGAGCGGTACCGTAAGATTCTGAATGATTTCAAAAAACCTACTCTAGGGTTCTTCCACATAGTTGG  
AGAAGCAGGTATAGGTAAGAGCACACTTGCCAAATTCATTTACAATGATCCAGAAGTAGAAGGAATGTTTCCATCAAGAT  
TGTGGGTTTGTGTGAAAGAGGAATTTGATACACAGAGATTGATGAAAGAGATACTCACTTTTCAATTTCTCCAGCACT  
TGTGACAAATTTGACTACAAAATTTGTGCCCCACAGATCAATATCTGAGAGAGAGAAGCTTTCTGCTTGTTTTTCAAGACCT  
TTCAATCAAGAACCTAGATAATTTGTTCCCTGTTTACAAGTTTATTGATGATGGGAAAGCCTGGTAGCAAAATCATAGTGA  
CCACTCAGAAATGAGGAAATGCAAATGCTATAGAATAACAATGATTTACAAGGTTGGGCAACAATCAGAGCAAAATCGG  
AGCCAGACAGCCCTAGACACGGTTACTAAAGAGACTGCAAATGTTAACAACGCCGACCAGTTCGTTCAAGTAACCCCTTT  
GGGTAAGATAGATCAATCTATCCCTTCTCAAACAATATTCAAAGTTAAGAGGCTGTCAGAAAAAGATTCCCTTTCTTTAT  
TCAAAGATTATGCTTCTACATATGAAGGTAATGAAAAAGATATAATGAAAACCTCTGAAGAAATGTAATGGAAATACCATTG  
GCAATAAAGTGTCTGGGGAGCATGTTATCTTAGTCTCCAGCAACTAAATGGATGGAGGATAATGAGCGCAAAAGGG  
AGATAATGATGCTTCTAGTACAAAATTTGATACTTAAACTGCTCAATGAGATGCCCTCACACCTGAGGCTTGTGTTTCT  
TTTATTGTTCTCAATTACCAAACGATAGCATACTGTCTCAAATGATGTCATTCAGTTATGGATGGCAAAATGGACTTCTC  
CGTTCACGCCAAGAGAATTACTTATCCTTGAAGACATAGGTGAGATTTATTTCAAAGAACTATGCTCAAGATGTTTCTC  
TCAAGATGTTGAGGAATATGGTCTTGGCTATTGGTTTTAAATGCACCCCTCATATTCGGGAACTTGCACGCCCTCGTGCAAA  
AACGAACTAAGGACTTGATAAGCATTAACCAGTCAACATGTCACATCTATAGCCTTCCAGTAAGAGATGAGGTGCCA  
TCTAGTTCTATTTCTAGTGAATAATGCATCTCAAAGTTCCAACACTTAAGATTATTTGATTTAGGCCACACAGATCTACA  
GGAAATTTCAAATACTATAGAAAACACTGAATCACCTAACATACCTCGACTTGCAGGGGAAATAAGAACAATCAAGCGTTAC  
CAAATGCAATCTGTAATCTACAACATTTGCAGACCTTGATCTTGCATCTTGTCTGCACCTTGAAGAATTTGCCAAAAGAT  
ATATGCAAGTTGAGCAACCTCAGATACCTGTGGGTAACATCAAACAAGCTTCGTTTGCACAAAAATGGAGTAGGAACCAT  
GACTTCTCTAAGATTCTCGCAATTGGAGGATGTGACAAACTTCAAGATCTATTCGAACGGCCATCATGCCTTGTACGCC  
TTGAAACCCCTAATGATTTACGATTGTAACCTTTGCAATTTGTGCCAAACGAGATGGGGTCTCTAATATCGTTACAGAAT  
TTGGTGATATGGAGTTGCAAAACACTTCACTGAAGGGCTTAGAGAAAGTCGATTTACAGCTCCAAAGATTCACAATCAG  
AGAGCTTCCAGAAGTGAATAAATTTGCCTGAATGGCTTCAAAGGTCGACAGAAACCCCTAAGAGTCTGGAAATCATCGATT  
GTCCCATCAAAGTGGAGGAAGAGGGAATCAAATAACATCACTGGGAATTTGGTACGGCGTAG

>Cucs. 337200

ATGGCTCATTGCATCTACACCAAGCTGAAAATATCTTGACTAAGCTAAAAGATTCCCCACCTACCAAAAAAGAAATAGA  
GTATGCGATGTCGAGCCTTAAAGCGGTTCTTTTGGATGCTGAAGAGAAGCAAGAACAATAACAACGCTTACAGAAGTGGC  
TAAAGGAACTTCAAATGTCTTTTACCAAGTTGAGGACTCCATAGATGAATTCAAATGGGAAATCTTCAAACAAAAGGAC  
ATTTGAAAAACAGGTAAGTCTGCCCCTTCTCGTGCTCTAATCAAATTTCTGCAAATAAATGAAACAGAAATGTAAGGAA  
GCAAGTATGCGACGAACCTAATAACATTTGCAACCCAGAATGTATGAATTTCAATCTCAAAGTAAAGCACATGATTCCATAA  
GTATGGAGACAACACACACTTTCCCTAGTGTCTCAGAAAATTTCAATAAGACACCTGAAACCAAGTTGGCAATGCTTTTAC  
CCTTTAATAGATGCTTCCAGAACATATGACGAAATATATGATGGAATTTTGAATGTTTTCAATGAATGTACTCATGTATT  
CCACATAGTTGGGGAAGCCGTTATAGGTAAGAGCACAGTGCCAGATTCTTGTACAATCAATAACAATGTAGTTGGTAAGT  
ATACTTCAAGATACTGGGTTTGTGTGGAGGAAGGCTTTAATAAACATAGATTGGTGAAGGAGGTTTACAGTCATGCAGAC  
AATAAAGAAATTTGCGAGGACTTGACGACAGAACAATGCTTTCTAAGGTTAAACGACTTCTGAAAGTGGAAACTTTTTT  
GCTCGTCTTCAAGACTTTCAATCACCAACTTGAAGATCGTTCCCTTTAGTGTTAAATGAATTTATGGAGATGGGAC  
AACATGGCAGCAAGATCATAGTGACCACACAACTGAGGAAATTTGCAAAATTTTACAAGACCGTGGCTACAAGACTGAG  
AGACGATCAAAGGAAAATCTGGCGAATGGTGACAGAGTATCTGCACACAATCAGTCGTTAACAAAAAATACCCAGAACCA  
AGCAGTTCCAGGTTCAAAAATTTGAGGAACTGCAGACGCTATAGCAAACAAAATCTATGAACACAGCCTATCATTAACAG  
AAGATGCTCAGAATCTAGAAGTTCCAATTCACAAGTTACAGAAGATACTAATATTGGCTTGGGGATCAATCCAGATATC  
CCACCGATAAAGCAAGATGATACGGAATATCAAACAATTTTCAAACCTTGAAGAACTGTCAAAGCAAAAGTTTCAATCTCGTTT

ATTCAAAGAATATGCTTTTCAGAAACAGACAAGAAGTAGAAAATCCAGAACTCACTAAAATAGTTGATCAACTTTTGGAGA  
AATGCATGGGAGTTTCCTTTTGCCAATAAAGTGTCTAGGAAGCTTGCTATCTTCAGAAAACATGCATAGCCAAGTGGAAAAAC  
ATCGAGGAAAAAGTTGTCGCTCCAAGAGAAAAAGGAAAACGGTATTTTACATGTACTCAGAGTTTGCTATGATCAAATGCC  
CTCACAACATGAAGCCTTGTTTCTGCATTGTCTCAATTACCTAACGATCGCATAATTTCTCAAATGATATGATTCAGT  
TATGGATGGCAAATGGGCTCCTCCATTACCTGAAGAGAGAAGAACTCAACTATGGAAAATATAGGTGAGAAGTACTTCATG  
GAGCTATGGTCAAGATATTTCAATCAAGAAATGAAGAACATGGGCTTGCTACTGGATTAAATTGCACCCCTCTCATCCA  
AAAACCTTGCACACAAAATCACACAAGAACAATCTGAGGGCTCGGGGGGCAACAATCATCCCAAAGAAGTCACTGAAATAA  
GATCCATAGCCTTTCAAGAAAGAAATATGGTGTCTACCTAATGCATCCCTAACTGAAAAGTGCATCTGGAAGTACAAAGGG  
TTAAGATTGTTGTATTTAAGCAATGCAGACCTACAGGAAATTCCAAATTCATAGGAACACTCAAGTACCTGAGATACCT  
CGACTTGCATGGCAATACGAAAATCAAGCATCTACCAAATCAATATGTAATCTACAAAGTTTGCAAACCTTAATCTTG  
GATCTTGTTCGACCTTGAAGACCTGCCAAGGATATAAGGAATTTGATCAGCCTGAGATACTTGTGGGTAAACAACAAC  
AAGCTTCGTTCTGGACAAAAACGGAGTTGGAAACCATGAATCTCTGCGGTTTCTTGCCATTGGAGGTGCAATAACCTAGA  
AAATCTATTTGAACGCCAGATTGCCTTGCAGGCCTCGAAACCTAATGATATATAATTGCACTACCTTGAATTTGTTGC  
CAGACGAGATGAGATATCTAAAATCACTACAAAATTTGATGATTTGGAGTTGCAAGCAACTTACACTAACTTAAAAGAA  
GTGGAATTCAGCTTCAAAGATTACGATCAAAGAGCTTCCAAGAGTGGAAAAGATTACCCCAATGGCTTGAANAACCTCGGC  
AGAAAACCTTTGAGAACCTTGCAGATCATCAATTTGCCATAAGAATAATGGAACGACAGGGAAATGAAAAGTACGAAGCAG  
TTGAAAATACCATAATCTATGGTGTGTAAGGTTTGAATGGCACCACCAGGTTACGACTTCGAACACCCGAAATTTGGCA  
GTGCGTAATGGGAATGAGGAGATGCATATATATCCTTAG

>Cucs.338100

ATGGCTGAAAATGGAACCTTTGTTGTTTCAGGAAGTTTTGAAGAGGATTGTAATAATATGGA  
GCAGAGCAAATTTGTTGTGGCATGGGAGTTGAGAATGAGGTGTCCTGTTGAAAGATAAG  
TTACACGATGCTGATACAATCTTAGAAGACATCAACAGAAAGAAATCACACCCTGGTAAT  
TCTGTGAAAAGATGGGTGAAAAAATCGAAGATATTGTCCATGAAGCCGATGATCTACTG  
GATGAGCTTTGTTATGAACATCTTCGACGAACAGTGGAGCATACTGAGAAATTTAGCAAG  
GTAAGTGATTCAATCTCATCATCCATAAATCTTTTTTTGTTTCGTCGCAAGATGGCCAAG  
AAAATCAAGAACATTACCGATACTTTAAATCAACATTATTGTGCGGCAAGTGCCTTTGGG  
CTAGTTGGTGTGGAAACTGTACAGAAATAGAGCTTGGCTCAATCAGATTCGAGAGACA  
ACCTCAATCTTGACTTCCAAGTCAAGGAGGGGAGGCTGAAATTTGGAGCTACTTAAA  
TTGGCGATTGACTCTACCAATGAACATCATATGTCTGTGATATCCATCGTTGGAATGGGT  
GGTCTTGGCAAAAACAACTTTGGCCAAGATGATCTTCAATCATCGTGAATTTGAAGGACAT  
TTTTGATAAAAATATATGGGTTGTGTGTCAAAACATTTTATTGTACAAAAAATTTTGGAA  
AAAATCTTTCAGGGTTTAAACAAAACCTTGTAGTGGGTTGGAATCCAATAAGGAGGCCTTG  
CTTGGGAGGCTGCGAAAGGAGATGCAAGACAAGAATTATTTCTTGTGCTTGTATGATGTT  
TGGGATAATGAGAAACACTTGTGGGACGAGCTTAGAGGCTGTTTGAACATATTGCTGGA  
AAACCTGGAATACTATTGTGATGACCACAAGGAATGAAGAAGTAGCGACGATGGTGGAG  
CCAATTTCTATTTATCGTCTAAAAAGTTATCCAATGATCAATGTTGGGCGTGTGTTAAA  
GAAAGTGCAAAATGCAAATCAGTTGCCAATGAATTCGAAGTTGGAGATTATGAAAAGGAG  
CTGGTTAAAAAATGGGTTGTACCCTCGTGGCAAAAAGTTTTAGGAGGTGCAGTCAAG  
TTTGAAGAACTGAACTTGAAGAGGAAGATCATGAGATCAGTTGGATGACAAAAGTTGAA  
AGCATTGTAAGGAACATTTCAATAGAGGACAAGATTTTGTGTTTGTCCATATTTAAATTA  
AGTGTGGATTCTTTACCAAATCCCCTGTTAAAGCAATGTGTTGCCTATTGCTCAAATTTT  
TCCCAAGATTATGACTTTTCAGAAAGATGACCTAATTTAAATGTGGATAGCACAAGGATTT  
ATCCAACCCGACAAGGAAGAGATAAGAACCTTGCTAATGGAGGATTTGGAGAACAATAC  
TTCAACTTCTTATTGTCTCGTTCCATATTTCAAGATGTCCTAGGGATGCGAATAAGAGA  
ATTGTTGGGTTTAAAGATGCATGATCTAATGCATGATATTGCTTGTGCAATTTTCGAGTCAT  
CAAAATGTAGAATCAAATCCAAATAATTTGAGTGGAAAAGTGAAGAAAGTTACGCACG  
TTGATTTGCAATGATGAAGTATTAATTTTGAATCAGAAAGACATTGTTTGTGTTTACGT  
GTTTTAAAGGTTATTTTTCAATCGCATACGGATTTGTGGATTCCAATAGACAAGTTGATT  
CATTTTGAGATATCTTGATATTTTCAGAATGTTCTATAAACAAGCTTCTTCTTGAATCCCTT  
TCTCTTCTTTATAATCTACAACCGCTAAAGCTTGGACAAAAGTGGTCTACCGAAGAATTTG  
AGAAAATTTGGTTAACTTAAGACATTTAGAATTTAAAATGTTTGGTGATACAGCAATGCCT  
TCAGATATGGGCAACTTGATTCATCTTCAATCATTGTCTGGATTTTTAGTTGGGTTTCGAG  
AAGGTTGTAAAATAGAAGAGCTTGGACCGTTGAAAACCTGAAAGGTAAACTAACTCTT  
ACAAATCTCTGGAGAGTGCAAAATAAAGATGAAGCTATGGCTGCAAAAATTTGGTGGAAAAG  
AAGAACTTACGTCACTAAACCTATGGTTTTTCGAAAACCGATAAGAGAGGAGAAGATGAT  
GAAGATGGTATAGTACAAGTGTGGAAGGACTTCAACCACAAAAACCTACAATCATTTG  
GAAATCCTTTGTTTTCGAGGAAAAGTTTTGCTACTGGTATTTTTGTTGAAAATTTAGTA  
AAGATACGTTTGGGTCATTTTGAAGATGTGAAGTGTCCCATGCTTGGACAGTTGCC  
AATTTAAAGGAACCTGAGATTATGTACATGGAAAAGTGTGAGAAGTATAGGGAATGAGTTC  
TATGGAGTTGACTCCAGCCACAAAATTTCTGTTGCTTTTCCACAGTTAAAGAAAGTCAGC  
ATTTATGAGATGATGAACCTAGAGCAATGGGATGAAGCAACGGTGGTCTTGCATCAAAT  
CTCTTTGGATGTCTAAAAGAAGTTAGGATTAGGAGATGTAATCCATTGGCAAAAGTTGCCA

AGTGGGTTGGAAGGTTGCCATTCCTTGAATATTTGAGCATCCGTGGTTGTTTTAATTTG  
ATGCTAAATGTGCAAAATTTGCACAAATTAACCATTTAGAGATTGATGGGTTGAAAAGA  
TTGCCAAAGGGAATGGACGGACTCACTCGCTTGAAAGAGTTGAAAATTTGGAGGATGCATG  
CAAAATTTAGTTTAGTTCCGTCATACACTTGGCTTCTCAGCTTGTGAACTTGAGTTG  
TCTGGCCGTTATGGGTCAGTTGACACCCAACTTCCCAACAACCTTCAACACCTCACTAAC  
TTGCAAGTATTAAGATTACACAGTTTGATTGCATTGAAGCTCTGCCAGAATGGATTGGA  
AACCTCATCTCTTTGAAAACATTGAAATGCTCCTATTGCTTTAAGTTGAAAGAATTACCT  
TCGAGAGAGGCCATATTACGCTAACC AAAATAGAAAATTTGGACATTTTTGAATGTCCA  
AAGCTACTAGTTGGGGAAGGTGACCAGGAGAGGGCTAAGCTTTCCCATCTTCCATCAAAA  
TGTGTTCAAAAATCTGAGTAA

>Cucs a. 338190

ATGGTTGGACTTCTCGACAGTGTGGCCGGAAATCTGCTCGGAAGGATAATCGAAGCCGCCGACCGACTAGAGTTTCGTGC  
TATCCAAAGCGAATTGAAAAACCTCGAAACAGATGTGTTGAATCTTAAGGCCAGACTCCGAGACGCCGAGGAGAAGCAGG  
CTAGTAATTTGAACTCAATGAACTGCTTAAAAACCTCAAAAATGTGTTTTCAAGGGCAGACATTGCAATTGAGGAATTG  
GAATGCGATTATTTGAAGTGAGAGTGCAGAATCGAAAGAACGACGTTGACGATAAGGGATGCCAGTTCTCTTCTGTTT  
CTCCTCCAATTTCTCATTCTCCATTTAATACCGGCAGTAAATCCAGGAAGATCTTAAAAATAATTACCTCCGAATTAC  
GTTCTGATTGAGAAAGCCATGCTAAATTTCTCTGGTTGAAAGATGAAGATGAATATATAAAAAAATTTGAAGGTTGAAATG  
ACTTTGCGGACTCCATTACTGGTTTCGCATGCTTTTCGCTAGGCTTCTGCGCTTGAGGAGAGAGGCGATTCTCTAATGT  
AGATTCCATTTTTGGTAGAGATAAAAATACAAGAGAGTATCATTAAGGAACCTGTGAATGATGAACAAAAATCTCCCCGTA  
TTCTTTCAATCCAAGGAGATGGAGGGATGGGAAAGACGGCTCTGGCCAAGTTAGTCTACAATGCAGACGAAGTGTGTTGAT  
CATTTTGACAAAGAGAATGTGGGTATGCGTTTCTGAAGATTTTGATATCCGAGAAATCTTAAGGGAGGTTCTGATGTCTGC  
AACTGGAGAAAATGTTACCACTGTTGCCTTAACCGAAAGTCGTTTACGAATCCGGCTCCAGCGGTACTTTTTTGGCAAAA  
AAATCTTGTGTTTGGATGATTTTGGAAATTTGGATCCCGAAAGAGTATCAGAAGTAAAAAATCGTGAAGATGGGT  
GTTGGTGGCAGCAAGATAATGATAACCCTCGCAGCGATGAAACTCTAAATGTTGCTACGACACACAAGATTGACAAAAC  
CGACGAGACGATATCTATGCAAAATATTCGAAGATACATATGGAAGCGAAGGGCTTAGCGAAGGGCTTAGAGACGATTTGT  
ATCTCAAAAACCTTGTGGCAGAATGTGGAGGAGCTCCTTTGGCAATCAAAATGTTTGGCTGGACTGCTCTCTCAAAACCG  
AGCGATGGTGTAAAGAGTCCAAATGTCAAGGACTTGAGTGAGAAATGGAAACAGGAAGAGGCAAAACAACGGTGGTGGCGT  
TTTATGTGCTAAGACTGAGTTATGATCTAATGCCATCTTATTTGAAACCTTGTTTTCTTTGCTTTTTCAGTGTGGCGA  
AAGATAATGTTCTTCTCATTTGAGCTAATCCAGTTATGGATGGCCACAAGGAATCCTTCCCTCGGGTACCAAGATAAT  
CCTGAAGAAGTTGGGGAGAAAATTTCAAGGAATTTCCGGATCGCCGTTTACTCGTTGATGTTGAGGAGCACACTTTGG  
ATATTGGTTCAAAATCCATAGCCTTTGTACATGATCTTGGAGTCCAAAAGGCTACGGAACAAAAGAACCTCGGAAATTTTC  
ATATGCTTTTCATTTGTCGATTGCGACAGCATCCCTTCGTCGACAAAATGATAAACACTCGTTTTATTTCCATTCCCCTG  
GTAGGAGGTGCGGGACCAAAATATCAATAGTGACCTTTTCAATGCATCACCCAGTTTCCAGGAGCTAAGGTTTTTGTACTT  
GTGCAACTCTTCTGGAAGAAATTTCAACCTCCATCGACAGCTGAAACATTTGAGGTGTTAGATTTGCGAGGGAGTC  
AACGTCTGAAGAGGTTGCCAGAATCAATTTGCAAACTACAGGCCTACAGACTTTGGTTCTTGCATTCTGCTCAGAGCTT  
GAAGAGCTTCCAGAAACATAAAGAACCTTGATCAGCCTCAGATCTTATGGATACAAACAAGCAAGCCGCTTGGAAAA  
AGATGAAATAGGAAGCTTAACATCCCTTCGTTTCTCGCCATTTGGAAGGAGTGA AAAACTTGACTCATTGTTTGAAGATA  
TCAACAACCTCAATTTCCCTCAAAAACACTGATCATTTATGAGTGCAAAATCGCTGCTAACACTGCCAAAAGGCTTGGAAAAC  
ATGAAATCTATATGTAATATGGGAATATGGGAATGTGATCGGCTGAGATTTACATTCTCACTGGCTTCACTTCACTCAA  
GAACTGATACTCAGAGAACTTACAGCAGTGTCCACTTTGCCTAATTTGGCTGTCCAATTTGGATGGTACTTTAGAAGTGC  
TAGAAATTTGAGAGATTCCCCACGCTAAGAAAATTTGCCAATCTGGCTTTTTAACTTTTTGGGAACTCCGAATCTTGGGATC  
TCCAACTGTCTAAGTTGAAGCATGATTCCTTCCCTCCTGAGCTAAATTTATTTTTGTGATAAGATTGAGGAGTTGAGGAT  
CACATTTTGTGGGCTTTGAGCAAGTCTTTGTTGAAA AAAAGCATGAAGGAAATGAACCTGAAAGCCGGGTAATCTTTT  
ACATCCATAACCATTTATGTGGACTCCAAAAGAATGACGCCACCAGTAGAATCAACAGACGCAACCTAAGGAGCAGAGACA  
AAACAGGATGATGCTTATAACAATGCAAGTCTCCTCCTGGGACTGAAACAACCTTCAAAGACTAAAACATGATGATGCGAATAA  
CAATATGAGTCATCTGGGATTGGACTACTTTTCAAGTCAAAAACAGGAGCATACAAATAACAATATAAACGAGATTGAGA  
CTGTTAAGGTTTGTGTTGGGTGATAATGACCATGCTGAAGTCCACCAAGCTATG

>Cucs a. 338650

ATGGCCGACGACTCCGACCTCAACACGGGAATTTGACTTACGATGTTTTCTTGTGTTTTAGAGGTGAAGATACTCGCAA  
GAACTTCACTGATCATCTCTACTACGCATTCAAAGATGCAGGCATCAATGTGTTTTGAGACGATCCAGAGCTCGAACGGG  
GTGAAGACATAAGTTCCGAGCTCGAGCGAGCGATCGAAGGGTGAAGGTGGCAGTTGTCGTATTCTCGGAAAGGTATGCG  
GAGTCCGGATGGTGTGTTGGAGGAGTTGGTAAAGATCATGGAGTGCAGGAGGACTTTGAGACAACCTGGTTTTCCCAATATT  
TTATAATGTGGATCCTTCATGTGTGAGGAAGCAAAAAGGTTGAATTTGAAGAGGCTTTTTGTAAACATGAAGTGC GTTATT  
TTAGGGATATTGATAGAGTTCTTAAGTGGAGAATGGCTCTCACTGAAGCTGCTAATTTATCTGGTTGGGATTTGAGAAAC  
ATTGCAAAATGGACATGAAGCGAAGTTTATAAGGTTGATTTGTTGAAAAGGTATCAAAGGAGGTGAACAGTAAATACTTATT  
CATAGCTTTTATCCAGTGGGAATTTGAATCAAGACTCAAACTCTTTTTATACATCTTCAATTTGGTTCAAATGATGTTA  
GGTTTGTAGGAATTTTGGGGATGGGAGGACTGGGTA AAAACCACCGTTGCAAAAAGCACTTTACAACCAGCTTTATCACAAC  
TTTGAAGCCAAATGTTTCTTTCCAATATCAAAGCTGAAACCTCCAATCTAATTTCACTTACAAAAACAACCTCTCTTCT  
CATCACA AATTTACCAACATCAATCTTGGAAACATCGACCAAGGAATCGCAGTGTGCAAGAAAGACTTCGTTGCAAAA  
GGCTTCTTTGATATTAGACGATGTAGACGACTTAAGCCAGTTAACTGCATTAGCAACAAGTCGTGATTTGTTGCTTCA  
GGTAGTAGAATTTATCATAACAACCTCGAGATCGACATCTGCTAAATCAGCTTGAAGTAGACGAAAATTTGTTCCATCGATGA



AATGGATGACGATGAAGCACTTGAACCTTTAGTTGGCATGCTTTTCGCAATAGTTATCCATCAGAAACCTTTCATCAAC  
TTTCGAAACAAGTGGTCACTTATTGTGGAGGATTGCCATTAGCTCTCGAAGTGTGGGTTCTTTCTTTTGGTAGAAGT  
AGAGAAGAATGGGAAGATACACTGAAGAAATGAAGAAAAATCCCAAACGATCAAATTCAAAAAAGCTTAAAAAAGCTT  
TGATGGGCTAAACGATCATACTTACAAAGATATATTTCTCGACGTGTCATGTTTCTTTATGGAAATGGAAAAGAACTACG  
TTGAACAAAATATTAGATGGGTGGGATTTTCCAAAGAAATCGGAATTAGTGTCTTCTTCAAAGATGTCTATTAACAATT  
GGAGACAAAAACAGATTAATGATGCATGATTTGTTAAGAGATATGGGGAGAGAAAATGTTTCGTGAAAATTTTCCAAAATA  
CCCTGAGAGACATTCAAGACTTTTTCTTCATGAGGAAGTCTTTCTGTCTTACAAGACAAAAGGGAACGATGCAACTG  
AAGGCCTAAGTTTGAAGTTGCCAAGATTTAGCAAGCAGAAGTTGAGCACAAAAGCATTTAATGAAATGCAAAAATTGAGG  
TTACTTCAACTTAATTTTGTGATGTAATGGAGATTTCAAGCATATTTCTGAAGAGATAAGATGGGTTTGTGGCACGG  
ATTTCTTTGAAGTTTTTGCCTAAAGAATTTTCATATGGACAAAATGGTTGCTATGGACTTGAGATATAGCCAAATCAGAT  
TCTTTTGGAAAGGAGTCAAGTTTCTCAAGAATTTGAAGTTTCTTAATCTAGGCCATTCTCATTACTTAAACCCACACTCCA  
AATTTCTCCAAACTCCCCAATCTAGAGATACTCAGCCTCAAAGACTGCAAGAATTTGATTGAATTGCACCTACAATTGG  
AGAATTAAGCCCTCATTTCCCTAAACTTAAAAGATTGCAAAATCCCTCAATTCACTTCCAAATAGTTTCTCCAACTTAA  
AATCCTTACAAACTCTCATTATTTCAAGTTGTTCAAAGCTCAATAGTTTGCAGAAGATTTAGGCGAAATACATCATT  
ATAACTCTAATAGCTGATAACACACCAATCCAAAAATCCCTAACACAATATAAACTTAAAAAACCTCAAATATTTATC  
TTTATGTGGGTGCAAAGGGTCAACCATCAAATCATCTTCTTCAATGATTTGGTCTTGGATTTACCCAAAGAAATTTAT  
CTCAAACCTACACATCAATTTCTTCTCCCTTCTTCAATTACAAGGCTTAAACTCCTTAAGAAAATTTATGCCTTAAAAATTTGT  
AATTTTGCAAAAGTCAAAATTAACCAATTTCCAAAAGATATCGGGAGTTGAGTTCTTTGAGAGAATTTGATTGAGATAATTTAT  
CCACAGTTTGGCATCAACTATCAGTGGCCTTTTGAACCTTGAAGACTTTTGTGGATAATTGCCCTGAACCTCAACTTA  
TACCAAATTTGCCACCACATTTGAGTTCATTGTATGCATCAAACGTACTTCAATTGGAAGGACTTCAGATTTGTCTAAT  
GTGAAGAAAATGGGATCTTTGTCTATGAGTAATTTGCCTAAACTTATGGAGATTCCTGGCTTGGACAAATTTATGGATTC  
TATTAGAGTTATTACATGGAAGGATGTAGCAACATGTCCAATTCCTTCAAGGATACCATCTACAGGGATGGACAGTTA  
GTGGATTTGGAGGAGTATGCTTCCAGGCAAGAAGTTCCAGATTTGGTTGCATACAAAGATGAAGGTCACTCAATATTT  
TTAGAATTTGCCTCAGTATAAATAATTTCAAATTTAGAAGGCTTCAATTTGTTGCATAGTTTACTGTTCTTGTTTTAAACAAC  
AGTCTCAACTGACCTTCCAAGTTTATCAGTCATTAATTTACACAAAATCTTCCATAACCAACAAACCTCTTACCAATG  
ATGTAATAATGTCAACTCAAGATCACTTGTGGCAAGGCCATTTATCTAACAAAGCCTTCAAGATGGAACCTGGCGATGAA  
GTCGAGATCATCGTTGATTTGGTGTGAAATCACCGTGAAGAAAATTTGGCATCTCGCTTGTGTTTGCAGAATATGTCGA  
TCAAACAATTTAGAGTTTGCATCCACCTGTAATGATGATGATGTCGTCGTTGGATAACCAAGATGAAACTGTAAGTGAAA  
AGGATGGAGAAGTTGGGAGCAAGAGAGGTTTGGACGAGATGATGATGAAGGATTTGAAAATTCATACCAAAATTTCCAAA  
AGGTTGAAGTGTGAGATTGATTTCAACATGAAAATTTGATGAGGAGTAG

>Cucs. 338660

ATGGCCAACGAGTTCCAAGCTCAACATGGAGACTGGACGTACGATGTTTCTTAAAGTTTTAGAGGCGAAGATACTCGAAA  
AAACTTCACAGATCATCTACTACGCATTGAAAGATGCAGGCATCAATGTCTTTCGAGACGACCCAGAGCTCCAACGAG  
GCGAAGACATAAGTTCCGGGGCTGGAGCGAGCAATCGAAGGATCGAAGGTGGCAGTTATCGTATTCTCGGAAAGGTATGCG  
GAGTCCGGATGGTGTGGAGGAGTTGGTAAAGATCATGGAGTGTAGAAGGACTTTGAGACAAAATGGTTTTGCCAGTATT  
TTATAATGTGGATCCTTTCATGTGTGAGGAAGCAAAAGGTTGAATTTGAAGAGGCTTTTGTAAAGCATGAAAAGGGTAAGG  
ATATTGATAAAGATTCGTAGTTGGAGAATGGCTCTCAGTGAAGCTTAAATGTAGCTGGTTTGGGTTTGACACAAAATGCA  
AATGGGCATGAGGCAGAATTCATAAAGTCAATTTGTTAAAATGATATCAAAGGAGGTGAAGAGCAATTTACTTATTATC  
TCTCTATCCAGTGGGAATTTGAATCAAGAATCAAACCTTGTTTTACCACATCTTCATATTTGGTTCAAATGATGATGTTAAGT  
TTGTAGGAATTTTGGGATTTGGAGGTTTGGGAAAACCACCATTGCAAAAAGCACTTTACAATCAACTTCATCACAACCTT  
GAAGCTGCATGCTTCTTGTAAATATCAAACAAACCCCAACCAACCAATGGTCTAGTTCACTTACAAAAACAACCTCCT  
CTCTTCGATTACAAATTTCCAGTAACATCAATTTGAAAACATGGATCGAGGAATCGTTGTGTTGCAAGAAAAGCCTTCGTC  
GCAAAAAGCTTCTTTTGATATTAGACGATGTAGACAAAATAAGCCAATTAAGTGCATTAGCAACAAGACGTGAATTTCTT  
GGTTCAAGGTAGTAGAATTTGCATAACAACCTCGACATCGAGTTTACTAAAACAGATTGAAGTAGATGGAATTTGTTCCAT  
TGATGTAATGGATGACGCTGAAGCGCTCCAACCTTTTAGTTGGCATGCCTTTCACAATAGTTATCCTTCAGAAAATTTTC  
ATCAACTTTCAAACGTTGTTGTTAATTTTGTGGAGGATTGCCATTAGCCCTTCAAGTGTGGGCTGTTTCTTTTGGC  
AGAAGTAGAGAAGAATGGCAAGATACATTGAAGAATTTGAAGAAAATTTCTAGATGATCAAATTCAAATAAAGCCTAAAAT  
AACCTTTGATACCCACAATGATCACACTTGTAAAGATATATATCTTGTGAACCAATGTTAGATGGGTGGGATCTTTTC  
CAAGAATTTGGTGACATAAACAGATTAGTGACAAGTGAATTTGTTAAGAGATCATACCAACCTTTTCTTCCGAAGGAAGTG  
CGCCTTCTGTACTTGGACCAAAGGTAAGAAAATAA

>Cucs. 368510

ATGCTGGCTTTTACGGTTGAAAGTGTCCGGTAGCTTGATGTTGGTTCCTCTTTTGTGCTCAAACCTTGACACTGCCCTTGA  
GCTTCTTAGTTGGTATGCTTTGAAGGATAAGTCCCATCAAGCAGTTACTTAGAGCTTGAGAAGTTGCCGTAGGTTATT  
GTCAAGGACTTCTTTGGCTCTTGTCTTTTGGACGAACCTGTGATCTCCCTCGAGAAAGGTGTTCAAGATATCTTCCAA  
ATAAGTTATGAGGGGCTTGAATACAGATTGAAGGAACCTTCTGTTGATATTTGTTGCTTGTTCGTTGGGGATGATGTTTA  
CTGCATGAAGAGTATGTTGAAGGCACGTGATCTCAATCCAGATTTAGGAATTCAGTTCTCAATGATCTTCTCTTATTT  
CTATTGAAAATGGTAAGGTGCAAAATGCATGATTTAATACCACAAATGGGTCATACCATTTGTTTCGTGGTGAATCATTGAC  
CTTGAATAAGGAGTAGGTTGTGGGTAGCGAAGGAAGAACAGATGCAGTTAAAGTCATAAAGCTGGACTTATCCAACGA  
CTTATCACCGACATCCATTGATGCACAAGCATTAAAACATGAAAATCTTAAATGCTTATCCTTCGAAATATAACAT  
TTTCTTACATATGTTTGTGATGTTGTTTAAATAAGTTCAAGTGGGTTTTATCTAGCTTTGGAATTAGATTTTCATCTTTG  
CCTGCAAGCTTTTGGTGAAGAGGGGCTTGTGGACTAGACATGCAACATTTGTTGCATCAAATATTTGGGAATAGATT

TGAGAATTGTGAACGGTTGAAGCATGTTGATCTCAGTTACTGTGAGCTTTTGAAGAAATTCCTGACTTATCTGTTGCAG  
TAAACCTTGAGTATTTGTACTCTGAGAGGGTGCATAAGCTTAAAAACGATTACAGAGTCTGTTTCTTCTCTAACAAGCTG  
ATAACCTTAGACCTTGAGGGTGTGTTAATCTTGAAGCTTCTAGCTACCTCATGTTAAAGTCTCTTATTCTTTCTG  
TCTTTCCGACTGTGTAAGCTTCAACGAGTTCAGAAATTTGATGAAAACATGAAATCTTTAACAAGGATGATTTTAGACT  
ATACTGCCATAGAGGAGTTACCTTCATCGATTGAACATCTTGTAAAGCTCGAGTTTTTAAGCCTTAAAGGTTGTGCAAAC  
CTCGTAGCTCTTCCAAGTAAAATTTATTTGTTACGAAGCTTGTGGAACCTCGTCTTCTGGATGTTCTAAACTCCACAT  
GTTTCTTGTCCAACCTACCGAACAGATATTCCTTCTTTCGAAGCTGACTATATTGGACCTTAAAAATTGCAACCTATCAA  
ATATAGATTTCTTGAACCTTATCTACTGATAGATTAATGACTCAGGGTCAAGAGAGTTCATTCTAATGAATGGTATG  
ATCCAGAAATGGTTCAACCATCAAACCTACTACAACAAGTTCAATAAGCGTTAGCCTTCAACACTGTCCACAAAAGACACA  
AGTGTGGCTGCCTGTGTTATTTTCAAAGTAGATGGAGATTCATGTGAAGCGAAGGCTTCTATAAAAATATGATATTTTCA  
TTGATGGTGAATCACTAAAATATTTTGGATCACCCTCCGGCCCTCATCGAAATCAGAATATATGTGGTTAATAACGACC  
CCTCTAACATTTAGCTCTGTGAGCATGAGTTGTCAAAGTCTCTGTACGATTAACAAGACTTATGATAATGCTAGAGCAAC  
CATAAGAAGTTTGGGCGTCCATATTGACGTTAGAGGGCAGCAAAGGCAAACCTTG

>Cucsa.017450

MLGQRYFLVLDVWVWENSLFWNELKCLLKITENSKNSIVVTRSAEVAKIMETCHSYFLSKLSNDHCWSLFKESANAYG  
LSNDFKLGDRSKRQCFYSYCSIFPKDFVFEKQGLVKIWMAGQGLFQPEGRNVTMENVGDMYFKILLSQCLFQISSNSMRLK  
FPESIVSLHNLQTLKFLHSHKIEEFPMNFTNLASLRHLELWVSSDKTPLHLSRLTQLQILSHFVVGFEKGCKITELGRKLN  
LQGSLSLLCSEKVESKEEANGANLAEKENLKLHNLWDMERKDNNSYNDLEVLQPNQNLQSLIIHSAERRLPNKIF  
VENLRVIHLYSSFNVCVPLMLGQLNLLKELEIYSFLGVRIIDNEFYGNDPNQRFFPKLEKFMVYEMINLEQWKEISRPC  
KLLNI PKVFIYENDMRNKSCLCYLNI GPLRKL PKDLCHLMLNREMEIVGNMHNDFGILQHLPLSKQITLVEDELSNNSVT  
QIPQQLQHLTALEFLSIKNEFGGIEALPEWLGNFVCLQTLGLSNCKKLLKLPSTGAILRLTKLKKLYAYKCPQLLLDEEKK  
R

>Cucsa.017460

MAEFLWTFVQEIILKQVLTVAEQIILAREVKDVLQQLQKELVESQKIVSAITTRQNHYSPPDSLVTVQWVNDLQLIVHEA  
DDLLDFILNKNQPIERLWSVISLSCLLYSSNPETKMKKEI IALLNKHCTKPLHLLQLEPTPSNIAETEVAQIQETVSKPE  
DYVVGRNREVETIVDRVIDASKQELNSILPVFGMGLGKTTLAKSVFNHRIKNHFGITIWIVSQPFVINNILQAILQK  
VEVHSSDCSNNREALLEKLTENMGKTYFLVLDVWVWENKMLWEKLECLMSITHMSGNSILVTTRSSGIKMMEEENIGS  
HELRLKLSDDQCSIFRNFANAKDVPMTSNLEFVQKEFDKRIIGGLPLIAKVLGAAVFPFSGDHDQWVANIKSVLTTPIKEEE  
FVKFTLKLSDRPLNASVKQCFAYCSNFSKGCDFDKQVIRMWMAQGFQPDERNNETMEDTGERYFNILLSFCLFQDVV  
KNERGII EKVRMHDLIHDIACQVSNDDKLRIDHIISSNWKDWTKDDKILVSKLRTINFYDRHHVVVQDKIGDFTGLRVLT  
IENYIVEELPNSIFKLLHRLYLDISYCYSIKKLPESIVLLYNLQTLRFHLLSKGFLPKNVGQMISLRHLEFSSIDKQMS  
YLSQLIQLETLPKFAVGFEGKCKITELGVLRLNKLGLLKLQRLHVESKEEAETAKLVEKENLEEVHVFVWTKERKRKVENK  
NDLEVLQGLQPKNVEYLRIKYFLGGCLPNQTFVENLVKIELRDCGNCEKLPRLGQLGNLEILDISWFERVKSIGNEFYG  
NSSNNQRSLFPRKLKELYVDEMRRIGEWEEVGSNVKAFPRLERLYIGCCRDLVKIPDVFVGYCDEYGEKHLEVEVIEIHLX

>Cucsa.017490

MDILVSVIAATIKPIGHQLGYLVCYNRNKKELEQLENLETTKKDVNQRVEEAKGKSYTI  
SEEVSKWLADVDNAITHDELSNSNPSFCFLAQRYSRKRKQVNYIILQMLNKRNSFVEV  
GYRAPLPDENTVVPGDYQVLESKTLAKDIKNALSKPEVNKIGVYGMAGVGKTYFLNEV  
KKLVKGEDRLFDRVIDVRVGRFNDVTDIQEQIGDQLNVELPKSKEGRASFLRNNLAKME  
GNILILLDDLWKEYDLLKEIGIPLSKDGCKVLITRSQDILTNNMNTQECFQVSSLSSEE  
SWKFFMAIIGDKFDTIYKKNIAKNVAKECGGLPLALDTIAKALKGKDMHWHEDALTKLRN  
SIGMDIKGVS DKVYASLRYSYDHLGDEETKLIFFLLCSVFPDDYKISIKNLQMYAMCMRLL  
NKVKTWEDSKNRVMKLVNDLIISSLLLEAESDSKDKYVKMHDVVRDVAIHASKEGNMST  
LNIGYNKVNWEDECRSGSHRAIFANCDNLNPLKMNFPQLELLILRVSYWLVEDNLQI  
PYAFFDGMVKLVLDLTGMCCLRPLWTTPSLNNLQALCMLRCEFNIDITIGELKKLEVLR  
IVKCNMLDHLPTMSQLTHLKVLEVLNCPKLEVVPANIFSMTKLEELKLQDSFCRWGEE  
VWYKDRLVKNVTVSELNCLPCLSNLSLESWNVKILSEISSQTCKKLEFWICSNESDDFI  
QPKVSNEYARTLMLNIESQVGSIDEGLEILLQRSERLIVSDSKGNFINAMFKPNGNGYPC  
LKYLWMI DENGNSEMAHLIGSDFTSKYLIIFGMKRLNIVPRHISLSPFKVKVKTIAIQF  
CGQIRNLF SFSIFKDLLDQIEIVINCCKMEGII FMEIGDQLNICSCPLTSLQLENVDKL  
TSFCTKDLIQESSQSIIPFFDQVVSFPELNDLSIVGGNNLETLWHKNNNPPTVLSLNL  
HLLNLPNLKHVWRKDIKILTFPSLKRVKIHGCTKLTWHVWKNNNKVTFRSFDLERIEVEK  
CKNLKYLPSIAFLNLKELHIKCKNGMINLFSSTVTKKLVNLSSIKVSYCKGMRCMVEV  
DQAENDEIITFKLSTLELDYLPRLDSFYSGKCMLEFPCELSLVIKRCPEMKTFSYGVII  
APRLQTLWMDKEFGVSSPACGINETIQNFRRVVCMFNSN

>Cucsa.017500

LPTSMSELKKLVVLDSCSNLVVHKNIISSMTKLEELDIQGRFTKWREKIVSVNPTKLSILLEGAEELVIVNDSKGFAN  
NIFKAIGNGYPLLKYLKILENSETPHLRGNDFTSLEWLVLKGMVMLESIVPRHSPNPNFKLKVVEITRCKQLRNFFSL  
SIFKGLSNLREIKISECDMMEEIVSIEIEDQITICTSPLTSLHICHMNKLASF CSTKSSIQQTIVPFFDERRVSFPQLED  
LSIFRANLEMLWHKNGTSF SKLQTV EISYCKKLRVFP SNIVTSLVSLDLEINCCGLEMI FEIEKPKTSCDTKVVP  
LRHLYLQVLP SLKYVWDKGDVVAFPNLKKVEVSRCPKLSIFPSPFTKYMKEIEELIVEDEPIFPVEDEASKLKEVAL  
FQSLKTLKMSCKEVVDERFWVMSKFSKLRLELVGCEDDDDDDDDDDKMSLPMEMSEVSY SIEELTIRGCLQVQVFGN  
DSYIQR CANLKNMNQMTATTF SKLVLDLQVHDCNGMINLFS P SVAKNLANLKSVEICNCREMTS IVAAKAE EEEENVEIVF  
NNLTNMEFDNLERLEWFYSRKRFEFPILD TLRIDKCYDMKIFSYGINKHSHFGKDLDRVELLYSNTTNRDK

>Cucsa.041670

MDSGDVESESTPAISTCLTIKIAPTSSKPPGTSSDLALPELKSSIESSPYNPSLLSPSSAFVSALQSPYISPRAVLK  
PEEKPIPAESTAALTCHSPLVSQSEDI PSSSYTPPSDQYEYSDDPSDSKVQFVACVPVPSAPPRI SFSPVPRTSFAK  
GGPLSPVSTSKLRSDVYIGFHGQANGLIRFCWKLKELELQGIACFIADRSKYSDNQSHEIADRVISSVTFGVVLTSS  
SFHNHFTLEEVRFFAQKKNLIPFFFDMESEISSFLNYSMDKEYKETVQGLLRFHEYKLEANEGNWRSC IAKAAGILRG  
KLGRMSTESDVERYEELPFPNRNRCFLGREKEIMEMEATLFGNRSYHKQDGTVSTLIVEGNSSQQSEGLADEESEPVSVRG  
SRFINLEIGRSDNPTLETWIEPVKGRNSFKRSKHKEMVKSNGHKSMSSSIVCINGNPGIGKTELALFA YRYSQRYKMVL  
WVGGEARYFRQNILNLSLNLGLDISADA EKDRGRFRSFEQEQA FKRVRKRELFGDMPYLLI IDNLEAEEDWWEKDLND  
LLPRNTGGSHVITITRSLKVM SFRMINIHPLALADAMVLMRGRRKKEYPADELEYLKKFDERLGR LTYGLWVIGSLLCEL  
AITPSSLFEAIEQVPIDECSPCPYISINEEHYCKSNPFLMKI IYFSFSILEQTNGPLASGIFLVGAWLAPAPISVSVLAT  
AAKDMAVSRKGFKIWSKYLSFMFGCCSTCLASQAWKSEESALLIKFGLARKANKQTGSWIQFHPITQVFAKRKEGLSA  
AKSIVQGIRKCSNNTMANLDHLWASAFLVFGFKSEPPFVQLKAVDMVLYIKKAALPLAIRAFTTFSRCSNALELLKVCTN  
ALEEVEKSFVSQIQDWCEGSLCWWKKFQGYQRVDEYVWQDVTL LKATLETRAKLLLRGGHFD SAEEELCRTCISIRTVML  
GHNHAQT LAAQETLAKIVRLRSKI

>Cucsa.088220

MDILVSVTAKIAEYTVVPGRQLGYVIHIANFQK LKTQVEK LKDTRESVQQNIYTARRNAEDIKPAVEKWLKNVDDFVR  
ESDKILANEGGHGRLCSTNLVQRHKL SRKASKMAYEVNEMKNEGEGFNTVSYKNAIPSVDCSLQKVSDFLDLDRKLTAE  
QIMDALSDDNVHRIGVYGMGVGKTM LVKEILRKIVESKSFDEVVTSTISQTPDFKSIQQLADKLGLKFERETIEGRAP  
SLRKR LKMERRILVVLDDIWEYIDLETIGIPSVEDHTGCKILFTSRNKHLISNQMCANQIF EIKVLGENESWNLFKAMAG  
KIVEASDLKPIAIQVVRECAGLPIAITTVAKALRNKPSDIW DALDQLKSVDFVMTNIGEMDKKVYLSLKLSDCLGYEE  
VKLLFLLCSMFPEDFSIDMEELHVIYAMGMGFLHGVDTVVKRRRIKLVDDLISSSLLQQYSEYGYNYVKMHDMVRDAI  
FIASKNDHIRTLSYVKRLDEEWKEERLLGNHTVVS IHGLHYPLPKLMLPKVQLLRLDGQWLNNTYVSVVQTF FEEMKELK  
GLVLEKMNISL LQRPFDLYFLANIRVLR LRGCELGSIDMIGELKRLEILDLSGSNIIQIPTTMGQLTQLKVLNLSNCFNK  
LEIIPPNI SKLTKLEELRMGTFGSWEGEWEYEGRKNASLSELRFLPHLFDLDTIQDEKIMP KHLFSAEELNLEKFHIT  
IGCKRERVKNYDGIKMNYSRILEVKMESEMCLDDWIKFLLRSEEVHLEGSICSKVLNSEL LDANGFLHLKNLWIFYNS  
DIQHFIHEKNKPLRKCLSKLEFLYLKLNLENLESVIHGYNHGESPLNNLKNVIVWNCNKLKTLFLNCLMLDDVLNLEEIEIN  
YCKKMEVMITV KENEETNHNVEFTHLKSCLWTLPLQLHKFCSKVSNTINTCESFFSEEVS LPNLEK LKIWCTKDLKKIWS  
NNVLI PNF SKLKEI DIYSNNLQKALFSPNMMSILTCLKVLRIEDCKLLEGI FEVQEPISVVEASPIALQTLSELKLYK  
LPNLEYVWSKDSCELDQSLVNIKRLTMD ECPRLRREYSVKILKQLEALS IDIKQLMEVIGKKKSTDPYNRLESKQLETSSK  
VEVLQLDGDSLEFPK LKTLKLYGFVEDNSTHLPMEIVQNL YQFEKFELEGAFIEEILPSN ILIPMKQYNARRSKTSQRS  
WVLSKLPKLRHLGSECSQKNND SILQDLTSLSISECGGLSSLVSSSVSFTNLTFLKLNKCDGLTHLLDPSMATTLVQLKQ  
LRIGECKRMSRIIEGSSGEEDGNDASFNH V

>Cucsa.089350

MNRASGSSSSSPFRCSFDVFLSFRGEDTRSNTSHLNMALRQRGINVIDNKISRGE EIS  
ASLLEAIEKSKILIVII SENYASSWCLNELEKII MCNELRSGQLVLP IFYRVDPSEVRK  
QSGRFGE EFGRLVRFSSDKMQAWREAMIYVSQMSGWPVLQEEYFSSSHISFYSFALHII  
SLLYFHYISSDEANLIQEVQEVFKLNRGII MQLRIPKYVPGIDIQVNNILFQIMSDK  
KIVMLGLYIGIGGKTTLAKALYNRIAHDFEGCCFLEKIREASNQYDGLVQLQKKILCDI  
LMDNSINVSNDIGVNIIRNRLCSKKILLIDDDVDTREQL EALAGGHDWFGHGSKIIATT  
RNMQLLASHGFNKLEKVNGLNAIEGLELFSWHA FNCHPSSDYLDLSKRAVHYCKDLPLA  
LEVLSFLNSIHDQSKFERILDEYKNFYLDKDIQDILRISYDELEQDVKIDFLYISCCFV  
GEDINEVMMKLEACGCLCLEKGTTKLMNLSLLTIESNR IKMHDLIQQMGRS IHLSKTFTS  
HKRRKLLIKDDAMDV LNGNKEARAVKVIKLD FPRPTQLDIDSRAFEKVKNLVVL DVNRVT  
SSKGTDLEYLPSSIRWMNWPQFPFSYLHTSFTIENLVKFNLPYSSIKKFGKALMCGEWLK  
EINLSYSKFLVEIPDLTTANLEKLNLEGCEKLVKVHESVGSLSKLV E FYLSSSVEGFEK  
FPSCLKLNLSLEALVVRYCRIECCPQFSEEMNSLEILEIDDSIINQLSPTIEYLTGLKEL  
WITECTKLETLPKILKVPKGVVRMDTRGCVSLAKFPNNI PDFISCDNVEYDTKDGVIKQ  
LILMNCDI PDWCKYKSMNSVTFDFLADYLSWKRKAFIALCVKFHV TNDHELVLKNCGVL  
FINDIEVWSRMSISN FNFWLSRGECLWMAVLHPCMHRLINPYGDDIMDISPNFSIGILDN  
KITLLFEVNPECKDT

>Cucsa.091460

MGSSVVGDES FSSSPNFYDYDVFFSFRGEDTRSNFISHLHMALRLKEVNVFIDDKLKRGEQIYESLLKFIERSRSLSVI  
FSKDYASSWCLDELVKIIECKKSKGQAVWPVIFYKVDPSSEVRKQTGGFGEALAKHEANKLLANKIQPWREALTFAAGLSG  
WDLANSKDEAEI QKIVKRVL SAVNPMQLLHVAKHQVGVDSRLRKEELVSHIGSEGVNLVGLYGIGGIGKTTLAKALYN  
KIATQFEGCCFLQDVRREASKHGLVQLQETLLNEILKEDLKVIVSRDRGINIIRSRKCSKKVLIVLDDVNDLEQLEALVG  
GRDWFQGSKIIVTTRNEHLLSSHGFDEKHKIQELNQDHALELFSWHAFKKSHPSSNYLDFSKRATSYCKGLSALVVLG  
SFLCGRAKEEWNGILDEFENSLRKDIKDVQLQSFQDGLDEKIKDIFLDISCLFVGEYKCAKMLLSACHLNIDFGIMILMD  
LSLITVEMDRVQMHELIOQMGRSIVHNESSEPGKRSRLWLEHDIWEVFNNSGTDVAKAIKLDLPKSTRLNVDPRAFGSM  
KNLRLLIIRNARFCTKIRYLPNSLKWIEWHGFAHRTLPSCFITKNLVGLDLQHSLIKRFKRLKVVSSRNSEFPSSKHTNFE  
CEWL

>Cucsa.091470

MDSSTVATESPTFKWTDVFLSFRGEDTRNFTSHLDMALRQKGVNVFIDNKLERGEQISESLFKSIQEASISIVIFSQN  
YASSWCLDELVNIIECKKSKGQNVFPVIFYKVDPSDIRKQTGSFGEALAKHQPKFQTKTQIWREALTTAANLSGWNLGR  
KEADLIGDLVKKVLSVLNRTCTPLYVAKYPVGI DSKLEYMKLRSHNLFKSNKFHYRKQHEYESDTGVYVMVGLYGIGGIG  
KTTLAKALYNKIASQFEACCFLSNVREASKQFNGLAQLQETLLYEILTVDLKVINLDRGINIIRNRLCLKKVLIVLDDVD  
KLEQLEALVGGRDWFGQGSRIIVTTRNKHLLSSHGFDEMENILGLDEDEAIELFSWHAFKKNHPSSNYLDSKRATSYCK  
GHSALVVLGVSFLCTRDQVWCISILDEFENSLNKDIKDIQLQSFQDGLDEKVKDIFLDISCLLVGEKVKYVKNMLSACHVN  
LDFGIIVLTDLSFITIENDIMQMHDLIKQMGHKIVCGESLELQKRSRLWLVQDVWEVFNNSGTDVAKGIKLDFFPNSTRL  
DVDPQAFRKMKNLRLLIIVQNARFSTKIEYLPDSLKWIKWHGFRQPTFPSPFTMKNLVGLDLQHSFIKTFGRLEDGERLK  
YVDLSYSTFLEKIPNFSAAANLEELYLTNCTNLGMIDKSVFSLDKLTVLNLGCSNLKLPKRGYFMLSLSLKKLNLSYCKK  
LEKIPDLSSASNLTSLHIYEECTNLRVIHESVGLDKLEGLYLKQCTNLVKLPSYLSLKSLLCLSLSGCCCKLESFPTI  
AKNMKSLRDLTDFTAIKELPSSIRYLTTELWTLKLNCTNLI SLPNTIYLLRSLENLLSGCSIFGILPSC LHKFMSLWNL  
RNCKFLQEIPLPESIQMDACGESLSRIPDNIVDIISKKQDLTMEISREFLLTGIEIPEWFSYKTTSNLVSASFRHY  
PDMERTLAACVSFKVNGNSSERGARISCNIFVCNRLYFSLSRPFLPSKSEYMWLVTTSLALGSMEVNDWNKVLVWFEVHE  
AHSEVNATITRYGVHVTEELHAIQTDVKWPMVNYADFYQLEKLQSLDIEELLKRLFEEMSCWSNSQAMLYAANYDPEAI  
IDSNIQPMIFPLHVTYNGETFCGMEGMGDTTLANSLCNKFNRSNDNGWPREALDDSTSFLHFRGGKFGYGSWSLSHHRK  
RGDGERGTNITTRTISSKRYLILFHKAGSYNHLFNFAGSHRLIAGSGSYDSLNGRQDVRLLIERVDTSL

>Cucsa.091530

QNHLLRSYDVFLSFRGEDTRNFTSHLDMALRQKGVNVFIDDLQERGEQISETLFSIHKTSISIVIFSENYASSTWCL  
DELVEIIECKKSKGQEVLPIFYKVDPSDVRKQTGWFGGALAKHEANFMEKIP IWRDALTTAANLAGWDLGTIRKEADLIQ  
VIVERVLSILNQTHTPKVAEYPVGI DYKIESLYWTQEMYKSECVDMVG IYGI RIGKTTLAKALYNKIASQFEGCCFLS  
NDNNSAFREFVLMNSGIPWLSYQTTSDSIRVSFQHNRTERTLATSVTFRVDGDSYQGMALVSCNIFIGCR LKSCYMR  
KFPTSTSEYTWLVETFSATSSSSLEMNDWNVVICFEAVNCPAVVTIRSYGVYFTEKVSQNDIKGPGATYTFDQDPDE  
LRSSR

>Cucsa.091680

MNQAGGSSSSCFRWSFDVFLSFRGEDTRSNFTSHLNMTLRQGINVFIDKKLSRGEEIC  
ASLLEAIEGSKISIVVISESYASSWCLNELVKIIMCNKLRGQVVLPIIFYKVDPSSEVGKQ  
SGRFGEFAKLEVRFFNMQAWKEALITVSHMSGWPVLQRDDEANLIQNIQEVWKKLDR  
ATMQLDVAKYPVGI DIQVRNLLPHVMSNGITMFGLYGVGGMGKTTIAKALYNKIADEFEG  
CCFLSNIREASNQYGGVLQFQKELLCEIIMDDSIKVSNLPRGITIIRNRLYSKKILLILD  
DVDTREQLQALAGGHDWFGHGSKVIATTRNKQLLVTHGFDMQNVGGLDYDEALELFSWH  
CFRNSHPLNVYLELSKRAVDYCKGLPLALEVLGSLFHSIGDPSNFKRILDEYEKHYLDKD  
IQDSLRI SYDGLDEDEGITKLMNLSLLTIGRFNRVEMHNI IQMGRTIHLSETSKSHKRKR  
LLIKDDAMDV LNNGKEARAVKVIKLNFPKPTKLDIDSRADFVKVNLVLEVGNATSSSS  
TLEYLPSSLRWMNWPQFPFSSLPPTYTMTENLIELKLPYSSIKHFGQGYMSCERLKEINLS  
DSNLLVEIPDLSTAINLKYLNLVGCENLVKHESIGSLSKLVALHFSSSVKGFQFPSC L  
KLKSLKFLSMKNCRIDEWCPQFSEEMKSI EYLSIGYSTVTYQLSPTIGYLTSLKHL SLY  
CKELTTLPKISKVPEGVICMSAAGSISLARFPNNLADFMSCDDSV EYCKGGELKQLVLMN  
CHIPDWYRYKSMDSLTFFLPADYLSWKWKPLFAPCVKFEVTNDDWVQKLECKVFINDIQ  
VWSSEEVYANQKERSGMFGKVSPEYMWLIVLDPHTRFQSYSDDIMDRSLKIIDLNQLS  
SEINSSQSILGKITVSFEVTPWKDVVIKMGCVHVIMGE

>Cucsa.091690

MNRATGSSSSHLRPFDFVFLSFRGEDTRSNFTSHLHMALCQKGINVFIDDDKLPRGEEIC  
TSLKAIIEESKISIVVISENYASSHWCLDELMKIIMCNKSNRNQVFPVIFYKVDPSHVRR  
QRGVFGEFAKLQVRFNSKMAWSEALTFISTMSGWDLKNYENEASLIQIIVQEVKRLK  
NSATTELDVAKYPVGI DIQVSNLLPHVMSNEITMVGLYGIGGMGKTTLAKALYNKISDDF  
EGCCFLANVREASNQYWGLVELQKTLIREIIMDDSIKVS NVGIGISIIIRDRLCSKKIILI  
LDDIDTHEQLQALAGGHDWFGHGSKVIATTRNKQLLASHGFNILKRVNGLNAIEGLELFS  
WHAFKNSHPSSDYLDVSKRAVHYCKGLPLALEVLGSLNSIDDSKFERILDEYENSYLD  
KGIQDILRISYDELEQDVKEIFLYISCCFVHEDKNEVQMMLEKCDSRFRLEMGIKKTDL

SLLTIDKFNVRVEMHDLIQMGHTIHLLETNSHKKRRLLEFKDVMVDVNGDMEARAVKVI  
KLNHFHQPTLDDISRGFEKVNKLVVLKVHNVTSSKSLEYLPSSLRWMIWPKFPFSSLPST  
YSLEKLTLSMPSFFIKHFGNGYLNCWKLRINLNYSKFLEEISDLSSAINLEELNLSEC  
KKLVRVHESVGLGKLAKLELSSHPNGFTQFPSNLKLSIQKLVMECRIVESYPHFSEE  
MKSSSLKELRIQSCSVTKLSPITIGNLTGLQHLWIDVCKELTLPKILKVPEGVIYMNAQGC  
RSLARFPDNIAEFISCDSEYVDGKYKQLILMNNCDIPEWFHFKSTNNSITFPPTFNYPGW  
KLVLAACVKVQVHDPVNGYHRGGDLECEVFFKDILVWSSGDWTNYLGYDSRWLPLGASP  
SEYTWFIVLNPHRDFSLDDWDDMMERSPETDLSQLCFGINSMEMDRNRSNDKWNSIGGSI  
WKNFTVLFEPFPLSPDTTISIKGCGVHVIME

>Cucsa.091710

MDRASGSSSSCFRWTDFVFLSFRGEDTRSNTSHLNMALRQGINVFIDNRISRGQEISASLFEAIEESKISIVIISQN  
YASSSWCLNELVKIIMCKELRGQVVLPIFYKVNPSQVRKQNGAFGEAFAELEVRFFDKMQAWGEALTAVSHMSGWVRQFE  
NLLSHVMIDGTRMVLGHGIGMGKTTLAKTLYNRIADDFEGCCFLANIREASKQHEGLVRLQEKLLYEILMDDFIRVSDL  
YKGINIIRNRLCSKKILLILDDIDTSEQLQVLAGGYDWFYGSKVIIVTTRNEHLLDIHGFKLRSVPELNYGEALELFSW  
HAFQCSSPTEYLQLSKDAVNYCKNLPLALEVLGSFLYSTDQSKFKGILEEFAISNLDKDIQNLQVSYDELEGDVQEMF  
LFISCFVGEDKTMVETMLKSCGCLCWEKGIQKLMNLSLLTINQWNKVMHDLIQQLGHTIARSKTISIPSEKKLLVGD  
AMHVLGDGIKARAVKAIKLEFPKPTKLDIIDSTAFRKKVKNLVVLKVKNVISPKISTLDFLPSLRWMSWSEFPSSFPSS  
YSMENLIQLKLPKSAIQHFGRAFMHCCERLQQLDLSNSFFLEEIPDLAAINLENLSLGCISLVKVHKSXVGLPKLIDLS  
LSSHVYGFQKQFSPPLRLKSLKRFSTDHCTILQGYPPQFSQEMKSSLEDLWFQSSSITKLSSTIRYLTSLKDLTIVDCKKLT  
TLPSTIYDLSKLTSEIVSQDLSTFPSSYSCPSSPLLRHLHYENKITNLDLFLETIAHAAPSLRELNLSNNNFSILPSC  
IVNFKSLRFLETFDCFLKEIPKIPGLISLGAYHWPNLPTT

>Cucsa.091780

MGSSTAATESMAFEWSYDVFLSFRGEDTRTNTSHLDMALRQKGVNVFIDDKLERGEQIS  
ESLFSKIQEASISIVIFSQNYASSSWCLDELVNIIECKKSKGQNVFPVYKVDPSDIRKQ  
TGSFGEAMAKHQPKFQTKTQIWRKALTTAANLSGWDLGAYRREADLIRDLVKEVLSTINR  
TRTPLYVAKYPVGIDSQLEYMKFHSNHLNKGKFKQYWTQNEYESDIGNVYVGIYGGIGLG  
KTTLAKALYNKIASQFEGCCFLSNVRQASNQFNGLVQLQQLNLLYEILEDDLKVFVNLKGI  
TIIRNRLRSKKVLIIVLDDVDKLEQLEALVGGRDWFGQGSKIIVTTRNSHLLSSHGFD  
NIQGLNQDRAIELFSWHAFFKESHPSNLDLAERATSYCKGHPLALVGLSFLCNRGQTE  
WRREKYNNAKMLSAACHLNVDGIMILMDLSLVTIEKDRVQMHGLIQQMGHSIVHNESF  
ESGKRSRLWSELDIWNVFNNSGTDAIKAIKLDLPNPINNVDPKAFRRSMKNLRLLIIR  
NAQVCTKIYLPNSLKWIEWQGFARHTFPSCFITKNLVGLDLRHSFIKRFKRLDCERL  
KHVDLSYSTLLEKIPDLAAANLEELYLINCTNLGMDKSVFSLNKLTVLNFKGCNSLKK  
LPKGYFMFSSKILNLSYQLEKIPDLSSASNLSLLNGCTNLRVIESVGLNELVL  
LDLGQCTNLSKLPYLRKLSLVYLVLFVGGKLESFPTIAENMKSLRCLDLHSTAIKELPS  
SLGYLTQLDKLHLTGTCTNLSLPTIYLLRNELHLGGCSRFFEMFPHKWPVPTIQPVCS  
SKMMEAASWSLEFPHLVNPNESICSHFTLLDLKSCNISNAKFLIILCDVAPFLSRLSE  
NKFSSLPSCHLKFMLSNLELRNCKFLQEIPLNPQINRNLDAAGCKSLARSPDNIVDIIS  
IKQDLELGEILREFLLDIEIPEWFSYKTASNLVTASLRHYPMERTLAVAVSFKVNGDS  
SESEAQISCNIFIYNKLRCLFSRSLPSKSEYMWLVTISLACSLEVNDWNKVFVWFVHE  
AHGVTVTRYGVHVTEQLHGIQTQDVKWPVMVNYADFYQLEKLRRLDLDLFDLKASLKKSAVQI  
PKQHCMHFSMIQRQ

>Cucsa.091820

MGSIVGAESSTSSSSFFKWSFDVFLSFRGDDTRSNTSHLDMALRQKGVNVFIDDMKLRGEQISETLSKAIQEALISIV  
IFSQNYASSSWCLDELVKIIECKKSKGQLVLPFIYKVDPSDVRKQTCGFGEALAKHQANFMEKTQIWRDALTTVANFSGW  
DLGTRKEADFIQDLVKEVLSRLNLCANGQLYVAKYPVGIDSQLEDMLKLSHQIRDAFDGVYMMGIYGGIGGKTTLAKALY  
NKIANQFEGFCFLSNVRETSKQFNGLVQLQEKLLYEILKFDLKIIGNLDEGINIIRSRLRSKKVLIIVLDDVDKLEALV  
GERDWFHGHGSKIIVTTRNSHLLSSHEFDEKYGVRSLSHGHSLELFSWHAFFKESHPSNLDLSKRATNYCKGHPLALV  
GSFLCTRDIKWRTILDEFENSLSEDIHIIQISFDGLEEKIKEIFLDISCLFVGEKDCRKLKHDLSYSSLEKIPDFP  
ATSNLEELYLNCTNLRITPKSVVSLGKLLTLDLHCSNLIKLPSYMLKSLKVLKLAYCKKLEKLPDFSTASNLEKLYL  
KECTNLRMIHDSIGSLSKLVTLDLGGKSNLEKLPYSLTLKSLLEYLNLAHCKKLEEIPDFSSALNLSLYLEQCTNLRVH  
ESIGSLNSLVTLDRQCTNLEKLPYSLKLSLRHFELSGCHKLEMPKIAENMKSLISLHLDSTAIRELPSIGYLTALL  
VLNLHGCTNLSLPTIYLLKSLKHLVYGGCSRFLSHFLEILCNVAPFLSSILLSNFKFSSLPCLHKFMSLWNLQLR  
NCKFLQEIPLNPHCIQKMDATGCTLLGRSPDNIMDIISKQVPHFHFHFPVLDGSDYQGMALVCKIFIGYRLQSCFMRKF  
PSSTSEYTWLVTSSPTFSTLEMNEWNHVTWVFEVVKCEATVTIKCCGVHLTEEVHGIQNDVKPGVYVTVFDQLDKL  
PSRIRMEGMAETTLANSICNKYERSRNLFSAKKALNHS'TGFLCGDGNGLSWEMVDRPILSDRLSSQKYLRIFFDDRDRYG  
DLNDVAHGTVNRFRSRLRMDDIKEDDIREEPYWKYMEX

>Cucsa.091840

MGSNAAGAESSSSPINWIYDVFLSFRGEDTRSNTSHLHMFRLRHKGVNVFIDDRIERGEQISEALLKTIQCCLISIVIF

SENYASSTWCLDELVEIIECKKSKGQKVLPIFYKVDPSDVRKQNGCYEGELAKHEANFMEKIP IWRNALTTAANLAGWDL  
GTIRNEADLIQVIVKEVSSTLNVTTTPSDKPLLVGIDSKIESLYWPTTEMYKSECVDMLGIYGI RIGIGKTTLAKALYYKMA  
SQFECCCFLSNVREASKQLNGLAQLQKLLFQILKYDLEDVDDLDRRNNI IKHRLHSHKVLILLDDVDVEMKQLKALAGGH  
DWFQGGSKIIVTTRDKHLLDSHGFGQTYEVEGLWEHNAFELFCWHAFKKSHPSSNYLDLSETRHRCKGHPLALVVLASF  
LCGRDQAEWSGLLDGFENSLRKGIDVLQLSFDGLEDEVKFFLDISCLLVGETVTVYVKKMLSEFHSILDFKISNLRHLS  
LIRMEEYDDDRVQMHDLIKQMGHKIVYDECGDEPGKRSRSGKRCSEHKKVGVYLI PPRVINVNPEAFRSMKNLRILIVDG  
NVRFCCKKKYVPNGLKWIKWHRFPHQTL PSCFITKDLLPSYLKLSLTDLDSGCRKLETFPEIDENMKSLERLRLSYTA  
IRKLPVSFAGLVFLSVLLKCVPKFFHSRVPKEILFFEHELELDLKGKCNISNVDFLENLCNVALSLT SIVLSENEFCSLPS  
CLHKFMSLRNLQLRNCMFLQEI PNLPQSIQIVDATGCI SLRRSPNIMWT

>Cucsa.091880

MESIPISIIAKICEYTVKPVGRQLCYVCFIHSNFQKLSQVEKLTDTKGSVEDKVF IARRNAEDIKPAVEKWLEKVDRLV  
RKSEKILAEHGRHGRLCSTNLVQRHKASRKASKMADEVLEMKNQGESFDMVSFKGRISLVESPLPKAPDFLDFGSRKSTV  
EQIMDALSDDNVHKIGVYMGVGGTMLVKEIVRKIEESKKSFDKVVSTISQTPDFKRIQGGQADKIGLKFQEETIEGR  
ATFLRRWLKAERRIPSVEDHKGICKILFTSRNKQLISNDMGANKIFEIKVLGEDESWNLFKAMAGEIVEATDLKPIAIQI  
MRECAGLP IAITTVAKALLNKPSDIWINDALDQLKSVDVGMANIGEMDKVYLSLKSYSYDLGYEEVKLLFLLCSMFPEDF  
NIDVEKLVHYAMS GMFLRGVDTVVKGRRRIKKLVDDLISSSLQOYSEYGNVYKIHDMVRDVAI LIASQNDHIRTLSYV  
KRSNEEWKKEKLSGNTTVFLIIQELDSPDFSKMLPKVQLFVLFVFGPSPSIYNRHVVS VVETFFYKEMLEGLVLSVKI  
SLSPQALYSFANLRLRLHDCELGSDIMIGELKLEILD FSKSNIVEIPMTFSKLTQLKVLNLSFCDELEVI PPNILSKL  
TKLEELHLET FDSWEGEWEYGRKNASLSELRYLPHLYALNLTIQDDEIMP KHLFLAGELNLENFHITIGCQRQRHIDN  
KTNFFRIKMESECLDDWIKTLKRSEEVHLKGSICSKVLHDANEFLHLKESLFSKLSVVVTKCNKLEKLFNCILDDI  
LSLEEIAIH YCEKMEVMIVMENE EATNHIEFTHLKYLFITYVPQLQKFKSIEKFGQLSQDNSISNTVDIGI FEVQESSI  
TDTSLIVLKNLRELKLYNLPNLEYVWSKNPCCELLSFVNIKGLAIDECPRLRREYSVKILKQLERLTM DIKQLMEVIENQK  
STDHNMVKSQLETSSKDNSTHLPVEIVQIILYQLEHFELEGAYIEEVFPSNILIPMKKQY YARSKNVRSWFLSKLPKLR  
HLWSECSQKNAFPILQDLNVIRISECGGLSSLVSSSVSFTNLTVLKV DDKDRLYLLNPLVATTLVQLEELTLRECKMMS  
SVIEGSAEEDGNEETTNI EFTHLKSFLKDLPRLQKFYSKIETFGQLSRDNSEN PETTTIHNRI GDSFFSEQESL PNL  
ETLRIDGAENLRMIWSNNVLI PNSFSKLEVEIYSCNNLQDVL FHPNIINMLTCLNTRIKNCELLEGI FEVQEPISVTK  
TKTNAIVLPNNLIELELYNLPNLEYLWSKNPNFERLVTFESIRSLSIEKCSKLKGEYFLS IKTFKQLVEVLQLRDGSKLF  
SNLKEKLYGFVEYNSTHLPMEIVQVLNQLKFKELKGMFIEEIFPSNILI PSMVLRKLTLSKLSKLRHLWGEC SQKNN  
SLLRDLTFLFISKCGGLSSLVSSSVSFTNLRI LEVEKCDGLSHLLSPSVATTLVHLEELRIEECKRMSSVIEGGSSEED  
GNDEIVFNQLHLIISCSNLT SFHCGRCI IQFPCLKQVYINKCTELKV FSLGIVSTPPLKYENIYLNDDDDDTWHHP  
KESIEMVETDMNVI IREYWDNIDTRISNLF GEE

>Cucsa.094560

MAEFLWTFVAVQEV LKKVVKLAADQIGLAWGLDKELSNLSQWLLKAEAILGEINRKKLHPS  
SVRLWVEDLQLVVHEADDLLDELVYEDLRTKVEKGPINKVRSSISSLSNIFIIFRFKMAK  
KIKAI IQKLRKCYSEATPLGLVGEEFIQTENDLSQIRETISKLDDFEVVGREFEVSSIVK  
QVVDASIDNVTSILPIVGMGGIGKTTLAKTIFNHEEIKGHFDETIWICVSEPF LINKILG  
AILQMIKGVSSGLDNREALRELQKVMRGKRYFLVLDVVDVNNENALWTELKHCLLSFTEK  
SGNAIIVTTRSFEVKGIMESTLSSHHLGKLSDEQCWSL FFKSANADELPKNLELKDLOEE  
LVTRYLDISNSKIEELPNSISL LYNLQTLKLGSSMKDLPQNL SKLVSLRHLKFSMPQTPP  
HLGRLTQLQTL SGFVAVGFEKGFKI GELGFLKNLGRLELSNLDRIKHKKEAMSSKLVEKN  
LCELFWEDMHILREGNNYNDFEVLEGLQPHKNLQFLS IINFAGQLLPPAIFVENLAVIH  
LRHCVRCEIILPMLGQLPNLEELNISYLLCLR SIGEYFNGYHYHPYSHKVLFPK LKKFVLS  
QMPNLEQWEVVFISKKDAIFP LLEDLNI SFCPILTSIPNIFRRPLK KLVHYGCHVETGL  
PKDLQLCTSIEDLKIVGCRKMTLNVQNMDSLSRFSMNGLQKFPQGLANLKNLKEMTIEC  
SQDCDFSPLMQLSSLVKLHLVIFPGSVTEQLPQQLEHLIALRSLYINDFDGIEVLPEWLG  
NLTSLVGLGLYYCINLKQFP SKKAMQCLTQLVHVVDVHNCPSQILSHDLKAKAHAKANLV  
QW

>Cucsa.094580

MAIAEFLWTYAVQQV LKKVLELAADQIEKLLHSSVRLWVADLLLVVHEADNLLDELVEYELR TKVEKGSINKVCSSVSS  
LSNIFIIFRFKMAKKIKSIEKLRKCYEATPLGLVGEEFIETENDLSQIRETISKLDDFEVVGREFEVSSIVKQVVDAS  
NQYVTSILPIMGMGGIGKTTLAKTIFNHEEIKRH FDETIWICVSEPF LINKILGAILQMIKGVSSGLDNKEVLLQELQKV  
MRGKRYFLVLDVVDVNNENALWTELKHCCLCFTEKSGNGIIVTTRSEVVGIMESTLPSHHLGKLFDEQC RSLFKESANAD  
ELPMDPELKDLOEELVTRFGVVPFVARLGS SMKHLPYNLSKLVSLRHLKFSIPQTPPHLSRLTQLQTL SGFVAVGFEKGC  
IEELGFLKNFKGRLELSNLNGIKHKKEAMSSKLVEKNLCEL FLEWDLHILREGSNYNDLEV LKGLQPHKNLQFLSINYA  
GQILPPAIFVENLVVIHLRHCVRCE TL PMLGELPNLEELNISNLHLRCIGNEFYGSYDHPNNHKVLFRLK KKFVLSMH  
NLEQWEELVFTSRKDAIFP LLEDLNI RDCPI LTNCPKIDLQ LCTSIEDLKIVGCEMI LNVQNMHTLSRFSMNGLQKFPQ  
GLSHLKNLKEMITIECSQDCDFTPLMQLSSLVNLDLVL FAGNAVQLPQQQLQHLTALRS LIINDFDGIEVLPEWLG NLAS  
LEVLGLYYCRSLKQFP SKKAIAMSHPI PCGCLWLSTTTQVRRFCAMMF

>Cucsa.094650

MAEFLWTFAVEETLKRTVNVAQKISLVWGLEDELSNLSKWLLDAGALLRIDREILRKESVVKRWADGLEDIVSEADLL  
DELAYEDLRKRVETSSRVNCFKSSVLNPLVRHDMACKMKKITKMLKQHYRNSAPLGLVGKESMEKEDGNNLRQIRET  
TSILNFDVVGRETEVLDILRLVIDSSSNEYELPLLIVPIVGMGGVGKTTLAKLVFRHELIIKHFHETIWI CVSEHFNIDE  
ILVAILESLETDKVPKREAVLRRLOKELLDKRCFLVLDVWNESSKLWEELEDCLKEIVGKFGITIIIVTTRLDEVANIMG  
TVSGYRLEKLPEDHCWSLFRKSANANGVKMTPKLEAIRIKLLQKIDGIPLVAKVLGGAVEFEGDLDREWTTLESIVREIP  
MKQKSYVLSILQLSVDRLPFVEKQCFAYCSIFPKDCEVVKENLIRMWIAQGFIOPTEGENTMEDLGEHGFNLLSRSLFQ  
DVVKDKYGRITHFKMHDLIHDVALAILSTRQKSVLDPHTHWNGKTSRKLRTLLYNNQEIHHKVADCVFLRVLEVNSLHMMN  
NLPDFIAKCLKHLRYLDISSCMWVMPHSVTTLFNLQTLKLSIENLPMNLRNLRHLEFHVYYNTRKMPSHMGELIHL  
QILSWFVAGFEEGCKIEELGNLKNLKGQLQSLNLEQVRSKEEALAAKLVNKNLRELTFEWSIDILRECSYNDFEVLEG  
LQPPKNLSSLKITNFGGKFLPAATFVENLVFLCLYGCTKICERLPMGLQLANLQELSICFMDSVRSIGSEFYGIDSNRRGY  
FPKLLKDFCWMCNLEVEANHESNHFGSLQTLKLDRCGKLTCLPGLNGLCECKSVHEVIISNCPNLTINVEEMHNLSV  
LLIDGLKFLPKGLALHPNLKTIIMIKGCIEDYDPSFPLNPLSLTKLYLNDGLGNATQLPKQLQHLTALKILAIENFYGIEV  
LPEWLRKLTCTLETLDLVHLVKSLSPLQGEDNRVAEIAIYETGEMETYECDNKRSWFRLHLNFYGCTLLEVEL

>Cucsa.094660

MADFLWSFAVDEVLLKKTVKLVAEQIGMSWGFKDLSKLRDSSLMVEAILRDVNRKAEHQALRLWVEKLEHIVFEADVLL  
DELSYEDLRKRVADRPVRSFVSSSKNPLVFRKMKANKIKAIKRLDEHYCAASIMGLVAITSKEVESEPSQILETDSFLD  
EIGVIGREAEVLEIVNKLLELSKQEAALSVLPIVIGGGLKGTSLAKAIFHHEMIRENFDRMIWVCVSEPFVINKILRAIL  
ETLNANFGGLDNKEALLQELQKLLRNKKYFLVLDVWNNENPDLWNELRACLKANKKFGSVIVVTTSDDEVANIVETNHQ  
RHRLRKLSDNYCWTLEKCAFSGDLVPTPRVDHVIREELVKRFGGIPLVVKVFGGMVKLDKNKCCQGLRSTLENLIISPL  
QYENSILSTIKLSVDRLPSSSLKQCFAYCSNFRPGFLFIREPLVQMWIAQGFIIHLPSGSNVTMEDIGANYFNTLLSRSLF  
QDVVKDDRERILYCKMHDVVDVACAISSNAQKLRSLSGKSGDKALSIGHEIRTLHCSENVVERFHLPTFDHSHVHNEISN  
FTYLCVLIHHSWFHQLPDSIAKCLKHLRYLDISHSLIRTLPDSIVSLYNLQTLRLGSKIMHLPKLRKLVNLRHLEFSL  
TQTKQMPQHLSRLLQTLSSFFVGFDFGCKIEELGPLNLLKGLSLFHLHVKSKTEAMAANLAMKENISDYFQWSLL  
SEREDCSNNDLNVLEGLRPHKNLQALKIENFGGVLPNGLFVENLVEVILYDCKRCETLPMGLHLSKLELLHIRCLDSVKS  
IGDEFYGNNSYHNEWSSLLFPKLTLLHISQMSLELWQIEGSSNYGATFPHLESLSIVWCSKLMNIPNLQVPPKLS  
LKIFYCEKLTPLPHWLNLCSSIENMVICNCPNVNNSLPLNLSMPLSSLSIQAFEKLEPEGLATIHNLKRLDVIYVYGLQGL  
DWSPFMYLNSSEILRDIDSLPEWLGNLTSLETNLRYCKNLKSFPSIEAX

>Cucsa.094670

MDLLYSKNYEDKILSNLRDSSLMVEAILRDVDRKAEHQAVKLVWEKLEAII FEVDVLLDELAYEDLRKRVEPQKEMMVS  
NFISFSKTPLVFRKMKANKIKNAKMLERHYSAASTVGLVAIILSKQTEPDFSQIQETDSFLDEYGVIGRESEVLEIVNVS  
VDLSYRENLSVLPVGMGGGLKGTALAKVIFNHELIIKGNFDRVAVVVCVSEPFLLIKKILRAILETLNSHFGLDSKEALLQE  
LQKLLNDKKYFLVLDVWNNENPILWNEKLGCLLKIISQSRGNVVVVVTTSDRVAEIMETHSRYHLTKLSDHDCWSLFFKKA  
FGNELLRIPELDIVQKELVKRFGGIPLVAVVMGGIVKFDENHEGLQKSLNLMRLQLQDENHVVSTIKLTVDRPLPLSLK  
QCFAYCSNFPKDFKFRKEALIQMWIAQGFIQPSLGSDEMEDIIGEKYFNVLRSRFLFQDIVKDNRRGRIIFCKMHDLIHDV  
ACAISNSPGLKWDPSDLFDGEPWRQACFASLELKTDCNENPSRKLHMLTFDHSVFNKVTNFLYLRVLIHHSWFICKL  
PNSIAKCLKHLRYLDISYSTRLEPDSAVLLYNLQTLKLSRFLNGLPKNLRLKLVSLRHLEFFSDPCNPKQMPQHLGKLIQL  
QTLSSFFVGFDDGCKIEELRSLRNLKGLSLLCLERVKSKKEAMAANLVEKRNISYLSFYWALRCERSEGSNYNDLVLE  
GLQPHKNLQALRIQNLGKLLPNVIFVENLVEIYLHECEMCELTPTLGLQSKLEVLELRCCLYSVRSIGEEFYGNYLEKMI  
LFPTLKAFHICEMINLENWEEIMVVSNGTIFSNLESFNIVCCPRLTSPNLFASQHESSPQLQHSAKLRSKILGCESL  
QKQPNGLFCSSLENMWISNCSNLNYPPLQNMQLNLSLITFRKLPDGLAQVCKKLSLVHGYLQGYDWSPLVHLGSL  
ENLVLDLGDGSAIQLPQLEQLTSLRSLHISHFSGIEALPEWFGNFTCLETCLKLYNCVNLKDMASKEAMSKLTRLTSLR  
VYGCPLNTFMFNGMSPNSSTSSSRTLSTLE

>Cucsa.102240

MALELVGGAVLGAVVGFELFKAILNLGERAISFNVPVKDIRSKLNAIMPLVKQIDELNDYLDYKPEETEKLRLMDEGKQL  
LLQCGDVKLGDNLNLYKRPSTYQKLRLEDLALRSFMDVLMQMARDQKKNMKMMNQMMIEICRLDNRGGSSKPMDFVPPC  
LVPQLREETVGLEKPVKELVKVLLKNGVQMLVVTAPGGCGKTTLALKFCHDKVEVKDIFQEKIFVPVSRKPDLLKILKDI  
ESLRGIQLPDLQSDERAFYCLELWLKQTSVNRVPLIVLDDVWVGQSEVLLDKLFLPCCIKLVTSRIFYPRFSESYYLE  
PLNHENAVQLFRRAASLDKGISKLPPDETVEKIIIGGCKRPLALKVIGRSLSHKPTSVVKVTGRNLRASGSI FDSDNELL  
ECLQSSLDVLDNMMVTKKSFMDLGSHFEDQRI SASTFIDMCTVLYTLDESEAMVTLDELSRSLVNFVTARKYGYDDDFY  
EYSFTQHDILRDLAIIHLMNMEPIEQRKRLILDINGNDLPKWVVDQEKHTSYARLISITTDKRFASWPDMEAPEVEVLI  
LNLQSRTYNLPGFIKRMNKLKVLIIITYFGSFLTEVTSEDNQLLDLSLTLERIRFERISVPIFSNPNPKPLINLQKISFFM  
CKFGQTFMDPSTPISDLLPNLLEISIDFCNNLSEVPNRLCEIVSLQKLSITNCHGLSSLPEVDGKLINLKNLRLRSCIHL  
EEFPESTTKLRELVLDDISNIGLAKLPEKIGEFHNLEKLDMRHCWSLSKPLPSIGKLNKVFCLCDREVGEWLKVPARL  
AKQVKVQEEANLEWLG

>Cucsa.123410

MAVTDFFVGEIATELLRMMVQLSTKSCCLKTTAAQIANSIQQILPIIEEIKYSGVELPAHRQQLDRFSETLRGIEISE  
KALQCGRLNIYRNLRLARKMEKLEKDICRFINGTMQAHILADVHMRFQTFERFDRLEGVLLERRLESKIRADASGEER  
WWWEEAFKKAEEEEYESNFVNI GTGLRVGKRKLKELVIGKEDLTAVGISGIGGSGKTTLAREFCCKDPEVRRHFKERILF  
LTVSQSPDVEQLRRTIWEFVMGSDSVNSNLIHLGRPSNSALLVLDVWSISVLENIIPNVTGCKTLVVSRRFKFPEVLE

TYEVELLKESEAIALFCHSAFQQSIPLSANHNLVKQVVNECKCLPLALKVIGASLRGQSEMFWNNAKSRLSRGEPICES  
HENKLLQRMASIERLSSKVRECFLDLGCFPEDKRIPDLILINVWKEHLDLDEEALAVLFELSQKNLLTLVKDARGGDI  
YSSYYEMYVTQHDVLRDLALHFSCQENVNDRKRLMMPKSDTELPKEWLRKSEQPFNAQLVSIHTGEMEEMDWPAMIFPEA  
KVLILNFSSSGYFLPSFLCNMPKIRALIVLNNNATHATLTFNSVFSSSLVNLRGIWLEKISMTQLFDACTPLKHLRKLKSLV  
FCKINNSLDEWAVDVSQIFPFLFELKIDHCNDRKLPSSICEMQSLKCLSVTNCHNLSQLPTNLWKLKLNLIIRLRFACPL  
LKTLSPSICVLSCLKYIDISQCYYLTSLEPEIGKLTSLKIDMRECSLIRRLPRSVVSLQSLCHVICEEDVSWLWEDLKS  
HMPNLYIQVAEKCFNLDWLKE

>Cucsa.128020

GASSKSHLLENWLQKLEEALYAVDVLDELSREALHREVMTRDKNKQVRIFFSKSNQIAFNRYMARQIKKEVIGRNDKK  
KVKHLLDDVWNESEEKWHGLKPLLMSGAGKSKIFITMRDSKIAAEIESMTSLFTLEGLPKSKSWSLFSKVASKEGKVL  
NSNLLQLGKEISVKCGGVPLFRHLRYPNLPENIMKSLPNSITELQNLQMLNLMYCSELMELSRDTRNLINLRHLDFNSST  
LTHMPEEMGKLNCPQTLSYFVLDYERSNQLSEPTVLIHLKGLDRIKNLEQLSYNPSELSLVNLKDIKGFKNLELEWNLSP  
DDQYEGEDEDTSAMEGLERHSNVESLHIDGYSVGLPNVWSTLLLKLTRITTYKCHRLQHLTQIAHLQALTFFLDDMS  
SLEFIDKNEPSSSSSFPSELLIENMNPLEGWWEELGNTQKNWLPPTFSTLISLHISRCPKFRFMPKPASTGTVVFLRDV  
SVQLETTLDPLWGLECLTLEKIKDLKYLETMESQLNISSLPQLRDLINKCSNLMLEPEWISSITSLEEEIMKCPKLL  
VAFASAVAPK

>Cucsa.128030

MAEAILFQVAGEILMKLSSQAFQRLGMLFGLKGLNKLTTTSTIKDVLLDAEGRQTKSHLLQNLWHLKLEEALYDAEDVL  
DELSTEALRRELMTDRDHKNKQVRIFFSKSNQIAFNRYMARQIKNIWERLDAIDAECTQFHLRENCESRTQYGSFDRIMM  
GRETWSSNDDEEVI GRDDDIKEVKERLLDMNMVTHNVSFIAIAGMGGIGKTTLAKSLYNDEEVS GFFDLKIWVWVSDQF  
EVQVVAEKMIESATKNNPVS VKGMEALQAKLQKVI GERKYLLVMDDVWNESEEKWHGLKSLLMGGARGSKVLI TKRDRKVA  
TEIKSMTSLFTLEGLSESNWLLFSKVAFKEGKESTDPSTIHLGKEILVRCGGVPLVIRHVGRMLYSKTSQEEWMSFKDN  
ELLEVIQQDNDMT SILKLSYNHLPNPKRCFAYSSLPFKGYKIEIKDLIRQWVAQGFIEVSNRKSLEDTGKDYFNELCW  
RFFYANSSDECNINDIVCMHDVCEFVRKAVAGNKLYVRGNPNNDYVVSQTLHISFDYGIQSWQDVLSKLCACKGLRTIL  
LLFRPYEKMNKIDKAILDELFSFPRLRVLDLHFSQISVVPKSIKKLRHLRYLDLSENDMELIPHSIIEQLNLQTLNLTE  
CYELKELPRDIDNLVNLRLHFTFPCMEVPTPTSEGMEKLTCLQTIISLFDCKKTNKLWELNDLSYLTGELKIIIGLEKLS  
SPSEITLINLKDCKGWQGLNLEWKLKDEYEGEADETIMEGLEPHPNVESLSINGYTGGALPNWVFNLSMKLTEIEIENC  
PRVQHLPPQFNQLQDLRALHLVGLRSLEFIDKSDPYSSSVFPPSLKFLRLEDMPNLEGWWEELGESKVVARETS GKAKWLP  
TFPQLSSMPKLASIGADVILHDI GVMVSTIGPVSSFMFLSMHGMTNLKYLWEEFQQDLVSSSTSTMSSPISLRYLTISG  
CPYLMSLPEWIGVLTSLTLETHICECPKLSLEPGMQQLKSLKELHIEDCPELEDRCQGGEDWPNI SHVFNFTYKNASDI  
DTPQSSSGFSHPPFSIVRISVI

>Cucsa.128100

MADSVLFNVAASVITKLGSSALRELGLSWGVDLDELKQNTLSAIKAVLLDAEEQQSKSHTVKDWIAKIKDVFYDIDDLI  
DEFSYETLRRQVLT KDRTITKQVRIFFSKSNQIAFGFKMGQTIKKVREKLDAAIAKAQLHLSVCAREVDNEPRKVRET  
SSFIPETEVIIGREDRKSVMDFLLNLSNITKDNVEVVSIVGMGGLGKTALAQTVYNDEKINNRFKWKIIVWCISQEFDIKVI  
IVEKILESITKTKEQSLDILQSMLEKIDGKYLVMDDVWVDHEKWI GLKRFMLGGAGSGSKILVTTNRLQVAQASD  
TVWFHHLKELDKDNSWALFRKMAFLNKEEELNSNLVRIGKEIVAKLKGYP LSIRVVGRLLYFKNTEMDWSSFKDNE LDS  
ILQEDDQIQPILKISFNHLPKPKLQCFYCALFPKDYEFKKNGLVKQWMAQGF IQAHNKKAIEDVGDYDFQELVGRSFFQ  
DIRKNKWGDLKYCKMHDLLHDLACSIGENECVVVSDDVGSIDKRTRHASFLLSKRLTREVVS KSSIEVTSLRTLDID SRA  
SFRSFKKTCMNLFLQRLTLNLDRCCHPPKFVDKHLKRLYLNLSGLNVTFLPNSITTLYNLETILRYCLWLKPKDIN  
NLINLRHLDIYDCSSLTHMPKGLGGMTSLQTMFMFVLGKNKGGDLSALNGLKSLRGLLCKIGLQFCTADLKNLELHWDI  
KMDHEDALDDGDNDDEGVLEGLKPHSNIRKMIKGYRGMKLCDFWSSNFGGLVLSIELSHCEKLEHLPQFDQFLYLKHL  
LGYLPNIEYIDSGNSVSSSTTFPSPLEKLRIESMPKLGWVKGEISFPPTIILHQLSELCIFYCPLLASIPQHPSLESRLI  
CGVSVQLFQVMIRMATDLSEHSSSSSTLSKLSFLEIGTIDLEFLPVELFCNMTHLES LIERCKSLQMSPPHVDDEDNDV  
VWKKLSNLRLRLESILKLEYFPKSLKYITSLETLKLNSCENLVSTEGIGELISLSHLEIDRCPNLPILSEDEVGDLSLS  
HLLIWNCPKLTSLSEGITRILTSLSSLCLEDCPNLVSLPQEFLLHHSSLPGGRFLRILNCPKLIQDKKQKEEEEEEDQEDW  
NELIHVLTGCR

>Cucsa.128110

MADSVLFNVAANVITKLGSSALRELGLSWGVDLDELKQLNLSAIKAVLLDAEEQQSVSHAVKDWISKLRDVFYDVDDLI  
DEFSYETLRRQVLT KDRTITKQVCIFFSKSNQVSFGHKMSQKIKQVREKLDAAIANDKTQLHLSVRMRETRDDELKRMRET  
CSFIPKGEVI GRDDDKKAIIDFLLDNTMEDNVEVVSIVGMGGLGKTAVASVYNDEKINEHFKLKLWVCISQEFDIKVI  
VEKIIIEFI AKKPPDLSQLDILQSMLEKIDGKYLVMDDVWNESETWVSLKRFMLGGAGKSRILITTRNLQVAQASDT  
VQFHHLKELDNESWALFRKMAFLNEEEEIENS NKVRIGKEI IAKLKGSP LTRIVGRLLYFKNTEMDWLSFKDNDLGTI  
LQQENQIQPILKISFNHLPNPKLHCFTYCALFPKDYEFQKGLVQWMAQGF IQSHSNKEIEDVGDYDFKELLGRSFFHN  
VKVNKGWDVKECKMHDLIHDLACWIVENECVDASDKTKSIDKRTRHVSFP SNYSRKSWELEAKSLTEVKNLRLTLHGPPFL  
LSENHLRLRSLNLGYSKFQKIPKFI SQRHLRYLDISDHDMKFLPKFITKLYNLETILRHCSDLRELPTDINNLINLKH  
LDVHGCRYLTHMPKGLGGLTSLQTMNLFVLGKDKGCDLSELNELARLRSLLIKGLELCTTTDLKNAKYMEKFGIQKLL  
LRWNRDLYDAETDYASENDDERVLDC LKPHSNVHKMQIRGYRGVKLCNWL SFDYLGGLVNI ELQSC EKLQHLPPQDQFPF  
LKHLLENLPSIEYIDNNNSLSSTTFPSPLEKLTIMTMPNKGWVKGETPPESARYSALFPTILHLSRLDISNCPQLAS



IPQHPPRLSLALNDVSVQLFDMVIKMATTPAADSSSALS KLSILHIQNIDLEFLPEELFGSTTDLEIFTVELKYMTTLER  
LDLYNCPNIVSLEGISHLTSSLRINCNSNLTSLEPESHLTSLSYLTICYVNLTSLEPGVSHLTSLSSTIEECPCLT  
SLPEGVSHLTSLSLTIIRRCVNLTSLEPESHLTSLSIFTEECLNLTSLEPEGLLHLSLRLGSLTVSKCPKLSKTWKLN  
K

>Cucsa.128130

MAIGDPQLPI LHRAPVDKSHGIIKLLSSHALECLGMVCGLNDDLNKLRNSVSSIQSVLRDAEQRIKGNHSLTDWLEKLG  
DVFYDVEDVLEI STEALRREVMTRGKNAQVRIFFSNSNQLAFNYRMACQVKKINERLDVISOEKDKFQLNGIAYLGIQ  
NVLSYPIGEMERDTHSSLSGDQKIIGRDEMNNLKNLLAEDDKVKANVSFTAIIVGMMGIGKTTLAKSLYNDKQVSDGFSS  
RIWIWVSNQFDTKITLKKIIESATEKKPKVEEMEPLKTKLEEVIGGKYYLLVMDVWNEENENEWENLKNLLMLGARGSKV  
LITKRDSKAVPGVETIPLKDLTEDFSWLLFKEVAFKESDLESINQNLIKMGKEISKRCGGIPLVIRHIGRLLYKGTSAED  
WEFIKENELLNVTREKNNNDGHVISTLKL SYNHLSPNLKQCFSYSSLFPKGYKIRMNELIRQWIAQGGFIESSNGGKSVEN  
IGKEYLDELCEWRFFYEISIEDVPFEEVGMHDLMDCLAREVAGQKLYIRGYPESGYVVSEQTRHISFEYEPERSWIDDVSKL  
QQAKGLRFTLLFTKNPFFTRNPIEKVLLDRLFSHFPRRLVLIQIPNVSKSIKKLRHLRYLELGEDAKSVNPSITKLQNLQT  
LDLTKCYDLKELPRDINNFNLRHLLCDSRLMMLQGTMEKLTSLQTLSSFLFDCKRFDKVKESFERSYFIEFDLKI KGL  
EQLRFSPSDVKS VNLKNKVP LRLRLKWK FENGNEYEGDADDIVLEGLEPHYPVNLQIEGYCGVGLPNVWVSTSILLRGIR  
IGNCDRLHLNLQLSHLHALEILNLEGLKSVMSISEWIGTTLTSLVLSLEIEECPKLSLPKEMQQLKSLVQLNIIKCPQLGER  
CKEGGEDWPNISHIPDVLID

>Cucsa.128140

MAEAILYNVTADIIFKLGSSALQELGLLWGVNDELDKLKHLSAIQAVLLDAEEQQSKSLAVKAWVSRLKDALYEIDDLV  
DESSYETLRRQVLAKDQRKRKLVRI LFSFKSNWKIDHKIKDIRQLQSINDDKNQFSFSEHVI EKRDDEELRKRRETY  
YILEEEVIGRNDDEKVEVIDLLNSNITEDIAIVSIVGMMGLGKTALAQSIYTHHMTNSGFELKLWVCVSEEFDLKVI IQ  
KMIESATGTPKPYLQIDISLQSELRKKIDGKYL FVMDVWNEKKEEWRLKRLLMGGAKGSRILITRSEQVAKTFDST  
FIHFLQILDEYNSWLLFQKITCLEGHPSNPEKLDQSSSLIQIGREIVSKLKGVP LTI RTIGLLKDNKSKRVWLSFKDNE  
LHRILGQGDNLKEVRLILELSYKYPANLQCFLYCALFPKDYEIKTHELILMWSAQGFIQPNGSKDNLIDIGNDYFM  
ELLSRSFFQEVTKNERGDI IACKMHDLMHDLACWIADNECNVINIGTRHFAWKDQYSHKDQLLRSLSKVTNLR TFFMLDS  
ANDLKWEFTKILHDHLQLRALYFKNLKNAMLVLEFTGK LKHLRYLSIMDSFILNLPDSITELYNLETILRNS SFKMLPD  
NIGNLINLKHLDLSNNRNLKFLPDSISDLCKLEELILHGCLRLEEFPEDTKKLINLKHLEKHADALWRDKEKGFNEGLC  
SLIKAVEKDFHSVHKCKLFFCSVVFLM

>Cucsa.132370

MGDLLTFGVQETLQAVTLVAKKIIASSEFKVLEELKDDLLHAEWILHAIKTKHDHSLNDKI THWVNDLQLIVYEAEDM  
LDLFAVDDVERKIRS NKVPNSLCTIKPMLDCFSLVV FVHLDNTRTKIESEVEQVEETTSLENYVVGREMEVESIVQDV  
TEASQQQLNSILPVYGTGGSGKTTLAQLV FNDERIGKQFHHTVWVCVSQPFVINEILQSI LKKVSKSNDNRSKDDKDTLI  
RNLKEVMGGKRYFLVLDNVWENKIFWEKLEKELMSIVEELGSSVLVTTTRSRKIAEMMKETLDTYHLNKLTDQ CWSVFS  
YFAKANAVPITSNLELVREELSVDRLPKASIKQCFAYCSNF PKGYWFDKKQVIKMMWAHGFTRPDEGNNETMEDTGERYF  
NILLSYCLFQDADDDKWHIGRFRMHDLIHDIA CDVSSDKRLQLDHSSSSKWKGLTEEKKKIESKLRTVIDFGRNGKIKD  
FVCLRVLTIAENVREL PNSISKLKHLRYLDISRCYSIKKLPESIVGHLEILLMGIDLPPKFEMPPYLSSELVQLQTLFAFA  
VGFETGRKISELRGLRNLKGLLKLHRLEHVESKEEAKAALVEKEKVEGLNLSWRGKWKNRLEPHKNLKD LKIQSFLGGC  
FPKETFVENLVTITLHKCGNCEKLPMLGQLSKLEALIIISNFPKVKSIGNEFYGNNDGQSKSSVVPKLEFYVIAMYS  
LVEWEEVNNVKAFFRLECLHIVKCTKLT SALKIVFSSLINFDHSISYLNLLPNSLKI LLSCLLQDVEDESEIGQKFLM  
HDLIHDIA CHVSNDEKLPDHSLLSMRKHWTNDDKIVASKLRTNIVKNENDFEVLEGLEQHNNLKYLEIESFSGGQFPNQ  
IFVENLVKITLIECGNCEKLPMLGQLTKYLEILVI FRLRKVESIGNEFYGNQRRSSSSVFPKLEFYVDEMDSLVEWEEA  
VSNYNVKAFFRLECLHII SCKKLLKIPDTKVQICGLLLLQLQEBAPWLICYSNVRSFFLKEDTGFS

>Cucsa.133510

MAGALIGGAALGVPFNELATLLKNFGERAWSFN SVLNETESKVNDIIPLVKEIDGLNESLDYPREETEKLKNLLEYAGKL  
LRRCLRVGKADLIRKSSHTTEKLRELNARIKSFSDVVLVQTSRDGKKTLSLVTEIKEVVRRLDSKSGLSNPV DLVVTVPI  
SEESVGLEKPEVKLAKLFRDGVRLVVTAPGGCGKSTLAEIFCHDKQVKNKFQRNILFLVVS SKPETKRILISIIQRLG  
GPIESGSVSDDEAFRLLEVRV GELSPNPVLIVLDDVWDGSESNKLEKFSRLPNCKVLVTSRFKFP AFGESYDLEPLDHK  
DAMELFRRWA SRGNRVLQFPDERIVEKIVRGCKRFP LALKVIAGSLSGRATSVWEVTGRKLSRGDSILGSEKELQKCLKD  
TLDAIPDDKIVLKECFMDLGSFPEDQRIRAA TFI DICAVLYEQDECETMSNLDELFTRTL VNTVSLRNKAHEDDYSES  
ITQHDVLR ELAVLLTNEQPVDQRTRLLVDINKNEFPK WWSVRQMOPVKARLLSITTDEKFS SCWPDMEAPEVEVLILNPG  
SETYKLPDFAKMNRKALIVRNYRSFPTEL TSDYQLINCLSRLEISLERISISSFIDQNLKPLWHLKLSFFMCKIDK  
AFTDCSTQISYMLPNLLEISIDFCNDLVAFFVGLCEVVTLEKLSITNCHALSSLP EIGQLINLKI LRLRSCIHLEKLP  
SISRLREL VYLDISHCVGLTKLPDKIGNLQKLEKLNWSCP NMRKLPKSVGNLKNLKEVVESEMKIWVNFVAPRLGNVV  
KEHKEEINLDFLN

>Cucsa.155730

MAISTNHSTLV LGIYMSGIGKTTLSKALFNHFFHFNRSRFLPNINSLS TSSPDGLLRLQQTLLSDLLIATNLRSRSS  
TTDSTVVRMQERLQNKVVLVDDLDRIEQANALAIRDRWF GDGSRITITTRNKQILD TLKVDEVYNMESNLLNDEESL  
ELFSYHAFREQNPPEELLECSKSI VSYCGSLPLALEILGGSFFGGRPMEEWRSAMERLKRIPAWDLQEKLRIGFEGLRDE

MEREIFLDVCCYFVGMKEELVVKIMDGCGRMYGESGLRGLKWRCVLGVFEFWSGRLKMHDLVRDMGREIVRQTCVKEPARRS  
RVWLYHEALKILLHQNGSENIEGLAIDMGKGNNEKFRLEAFGKMRNLRLLKLNLYVHLIGSNFEHIISKELRWICWHGFP  
LKSIPSSFYQGNLVAIDMRYSSLIHPWTWRDSQILENLKVLNLSHSEKLLKSPNFTKLPNLEQLKLNCTALSSSLHPSIG  
QLCKLHLINLQNTNLSLPTSINYNLHSLQTFIISGCKIHLHDDLGHLESLTLLADRTAISHPFSIVKLLKLTDL  
LCGCNCRSGSSASLPRVLVSWALPRPNTCTALTLPSSLQGLSSLTELSLQNCNLESPLIDIGSSLSELKLNLGKNK  
LRVLGTELCGLLKNLNLVENCGRLEFIQEFPKNMRSFCATNCKSLVTRTPDVSMFERAPNMILTNCALLEVCGLDKLEC  
STNIRMAGCSNLSTDFRMSLLEVFSSSYLLNLYKGFVAFVHLYIVSI

>Cucsa.163670

MIPHEILSLFITSVYEYLTNIATKLGSLALQDLGLLWTGIHEEIDKLRDRTLSAIQAVLHDAEQKQYKSSAVKEWVSRLKD  
AFYDMDDLDEFYSYEFQRQVMTKHRNTNCTKQVCIFFSKSNQIRFRLKVMHKIKKIREKLDTIDKDKTQFNLFDNTR  
RNDNEMTKRSGTCSFIELEGEVIGRDDDCKCIVHFLLDNTNIAKENIVVVAIIGMGGGLGKTALAQSIYGMKKNKHFELTMW  
VCISEEFDVKVIVEKIIIESLTKKRPKPNLTLDTLQSMLEKIDGKKYLLVMDDVWNDERTKWINLKKFLMGGAKGSRILI  
TTRTHQVAHIFDTDLFHDSELDKDNWELFRKMAFSNESEMLENSKLVGIGKEIVTKLKGSPLAIRVIGSYLYSKKSEK  
DWLSFKENELDTIMQGENEQSILKISFNHLSSSLKQCITYCALFPKDFEIDKDDLIKQWMGEGFIQPHNKKAMEDVGD  
YFKELLGRSFFQDISKNQLGEIMKFKMHDFMHDLACFVGENDYVFATDDTKFIDKRTRHLSISPFISKTRWEVIKESLIA  
AKNLRTLNYPACHNYDGDIEIDFSNHLRLRNLNLI FSTHVPCIGKMKHLRYINFTRCYDFLFPKVVTKLYHLETIFRE  
CFKLELPSDITNLINLRHLGINSLEGLSYMPKMGMSMTTLQTMNLFILGENEGGELSELNGLINLRGSLSIQQLQFCK  
PIGIENAKHLEEKSGIQKLLYWYLLERKYEIDDEDEKVECLKPHPNLQKIVINGYGGVKLCNWFSDYIVNLVIDLF  
NCNKLQQLPRFDQFPFLKHLKQYLPNVEFIDNNDVSSSLTTFPSPLEKLRIFRLPKLEWWRKRLIDQTIPOHRRLES  
LNI SGVSLQVFEVLMEMATTNIIVGSQDSSSSTTSISLSFLSIEDIDFEFLQFHDLFSNMTHLKSLLWIINCKNIKMS  
DAVTWKGLGSLRELMLSSI PDLEYLPKSLQCVTTLQSLQIYNCNPLVSI SIRHLTTSLSVLEIHGCPNITFFYPHEMSQL  
ASLAITFQNRGWSNDYDPGEGRKEDDDQKQFGRDEQHEGTH

>Cucsa.178360

MELCAGAI VNP IAEKIANCTVDPVFRQLDYLLHFKTNVNDLKDQGGKLVETRDFVQHSVDSAKTNGYEIEVMVTEWLGIA  
DQFSEDVDRFFNEADGRSLRWNMLSRHRFSRRATKLAVAVDKAIQGGSFERVGFVRVTPQEIMTLRNNKKEAFESRVL  
LKEIIEAVGDANARVIVVHGMAGVGKTTLVEE IARLAKEGKLFDAIAMVTVKHIPNIKKIQGEIADQLGLKFEEEKERIR  
ADRLRRRLEMEKKVLVVLDDVWSRLDLEAVGISSHHKGCILVTSRKDDLFFNDFGTQKNIYINILSKKEARDFFNK  
DSVSSDDTDPMEAVATELADECGGLPLSLATVQGALKGKGLPSWNDALQGMKFPGEPSNYGVNKVAYLSLKVSYRSLN  
REEARSLFLLCSLFPEDYQINIKYLLMYAMGLGLLNAMSSLAMAKWRILSLVDELKTSHELLLDGVDNDFVMKHDIVRDTA  
ILIASKMSKYLVRHGAGESLWPPMDEFKDYTAISLGCSDHSELPEFICPQLRFLLLVVGKRTSLRLEPEKFFAGMQLRVL  
DLTGLCIQRLPSPIDQLVNLQTLCLDDCVLPDMSVVGELKLEILSLRASDI IALPRVIGELTNLKMNLSDCSKLVIP  
ANLLSRLIGLSELYMDNSFKHWNVGMQMEGYVNARISELDNLPRLTTLHVH I PNPTILPHAFVFRKLSGYRILIGDRD  
WDS GNYETSRTLKLDSSIQREDAIQALLENIEDLYLDELESVKNILFSLDYKGFPKLGLRVKNNGEIVTVVNSDNMHH  
PH SAFFPLESFLKLNLAELGSI CRGKLPQMSFRNLKRVKVESCDRLKVFVFPSSMVRGLIHLQSLSEI SECGI IETIV  
SKNKET EMQINGDKWENMIEFPELRSILIQHLPALMGFYCHDCITVPSTKVDSRQTVFTIEPSFHPPLSQQVSFPKLE  
TLKHL NSGKIWQDLPSFFYGFKNLTSLSVEGCASIKYLMTITVARSLVNLERLELNDCKLMKAI I I SEDQDLN  
NYPKSKILQN KDVFNLESLLI SRMDALETLWVNEAASGSFTKLLKVDIRNCKLETIFPNYMLNRVTNLERLNVTD  
CSSLVEIFQVKVP VNNGNQVRDIGANHLKELKLLRPLKPKLHIWSSDPHNFLRYPQLVHTIHCQSLNLPV  
SIAKDLIQLEVLKIQFCGVE EIVAKRGDDGDGDAASFLSGLTSLTLWNLFEFKRFYPGKYTLDCPSLTALDVRHCK  
SFKLMEGTLENSSSISSAVEKVLHSL

>Cucsa.178450

MNQASGSSSSSRFRWHFDVFLSFRGEDTRSNTSHLNMALRQRGINVFDNKL SRGEEISASLLEAIEGSKISIVI  
ISEN YASSRWCLNELVKIIMCNKLRGQVVLPIFYKVPDPSEVRKQSGKFGEEFAKLEVRFSSEKMQAWREAMI  
SVSHMSGWPVK KDDEANLIQRIVQEVWKKLNRGTREMRVPKYPVGI DRQVNNILSQVMSDEIITMVG  
LYGIGGIGKTTLAKALYNKIADDF EGCCFLINVREASNQYRGLVELQKELLREILMDDS  
IKVSNLDIGISIIIRDRLCSRKILLI LDDVDTSEQLEALAGGHDF GPGSVVIATTRNKHLLAINE  
FDILQSVQGLNDEAFELFSWHAFKMSCPSSHLYLISKRAVS YCKGLPLALEVVG SFLY  
SIEPSKLLILDEYENQYLDKGIQDPLRISYDGLEDEVKEIFLYISCCFVGEDINKVKMKLEACGCLC  
LEKGTTKLMNLS LLTIDKSNRVEHNLIQHMGRTHLSKSTSTSHKRRLLIKDDAMDVLNGNKEAKGV  
KAIKLSFPKATELIDISRAFEKVK NVVVLEVGNVTSKGTDLLEYLPSSLRWMNWP  
HFPFPLPTTYTMENLMELKLPYSSIKHFGRGFM SGERLKEIDLSGSEF LVEIADLSTATNLEKLN  
LLGCVNLVKVHDSVGS LTKLVTFSLSSNVKGFQFPPLKLLKSLKLLSMENCRIDEWCPQFSE  
EMKSSLEELLIQYSTVINQLSPTIGYLTSLKRLFIIECMKLTLPSTIYRLRNLTFLSITNLD  
FLETMVHVAPALKLLDL SGNNFCRLPSCIINFKSLKSLVTMECKLLEBIPKVPKGVVRM  
NATGCISLTRFPDNI PDFICDDNVVRIIVLSHDLMIS RVFRSYKN

>Cucsa.178620

MAEAILFNLTADIIFKLGSSALRQFGSLRGVKKDDFDKLWHSLSAIQAVLHDAEEKQFKD  
HAVEVWVSRLKDVLYEIDDL IDEFSYQILRRQVLRNRRKQVRTLFSKFITNWKIGHKIKEIS  
QRLQININEDKIQFSFCKHVIERRDDDDGLRKRRETHS FILEDEVIGRNDK  
EAVIDLNLSNTKEDIAIVSIVGMPGFGKTALAQSIYHNKRIMTQFQLKIWCVSDE  
FDLKITIQK IIESATGKPKSFLQMDPLQCELKQIDGKKYLI  
VMDDVWNEKKEKWLHLKRLLMGGAKGSRILITTRSEQVAKTFDSTF  
VHLLQILDASNSWLLFQKMI GLEEHSDNQEVELDQKNSNLIQIGMEIVSTLRG  
VPLLIRITIGLLKDNKSERFWLSFKDK

ELYQVLGRGQDALKEIQLFLELSYKYLPSSNLKQCFLYCALFPKDYRIKKDELILLWRAQGFIIQQNGNDDNSSLVDIGE  
DYFMELLSRSFFQEVEKNDFGDIITCKMHDLMHDLACSI TNNECVRGLKGNVIDKRTHHLSFEKVSHEQDLMGSLSKATH  
LRTLFSQDVHSRCNLEETFHNI FQLRTLHLNLSYGPPKCAKTFLEFIKFLPDSITKLYKLEALILDGCSNLKELPKYTKRLI  
NLKRLVLYGCSALHTMPKGLSEMNTLQTLTTFVLGKNIGGELKELEGLTKLRGGLSIKHLESCTSIVDQQMKSKNKFLQ  
LKSGQLNLELQWKKLIGDDQLEDVMYESVLDCLQPHSNLKEIRIDGYGGVNLCDNWVSSNKSGLCLVTTYLYRCKRLRHL  
FRLDQFPNLKYLTQLNPNIEYMIVDNDDSVSSSTIFPYLKKFTISKMPKLVSWCKDSTSTKSPTYWHAPKLLQLISDS  
EDELNVVPLKIYENLTFFLHNL SRVEYLPWCWQHYMTSLQLLCLSKCENLKS LPGWIRNLSTLNLNLSYCEKLAFLPE  
GIQHVHNLQSI AVVDCPILKEWCKKNRREDWPKIKYIYISEHIWENICSLTGSWSSRNKIFSDHFRS VIALNCSACFYLIY  
ICRCYYELISSPFFIILYHVLFNE

>Cucsa.189390

MDIISPVGPIVEYTLKPIGRQLSYFFIRQHIQNLESQVELLKNTKESVNVKNVNEAIRNAEKIESGVQSWLTKVDSIIIE  
RSETLLKNLSEQGLCLNLVQRHQLSRKAVKLAEEVVIKIEGNFDKVSPPVALSEVESSKAKNSDFVDFESRKPTIDKI  
IAALMDDNVHTIGVYGMGGVGTMLVQEISKLAMEQKLFDEVI TSTVSTPDLRRIQQQLGDKLGLRFEQETEEGRALKL  
LNRLKMERQKILIVLDDVWKQIDLEKIGIPSI EDHSGCKILFTSRDNDVLFNDWRTYKNFEIKFLQEDETWNLFRKMAGE  
IVETSDFKSI AVEIVRECAHLPIAITTIARALRNKSPASIWKDALIQLRNPVFNIREINKKVYSSLLKLSYDYL DSEEAKS  
LFLLCSMFPEDIIDCQVLHVYAMGMGLLHGVESVAQARNRITKLVDDLIS SLLLKESENVDLVMYVMKMDIVRDVAII  
ASKDDRIFTLSYSGLLDESWEDEKLVGKHTAVCLNVKGLHNLPPQKMLPKVQLLVFCGTLGGEHELPGTFFEEKMGMRV  
LEIRSMKMPLLSPLSYSLTNLQSLHLFDCELENIDVICELNKENLSLKGSHIIQIPATISQLTQLKVL DSECYALKVI  
PPNILLVNLTKLEELYLLNFDGWESEELNQGRRNASISELSYLSQLCALALHIPSEKVMPELFSRVFPFELNENESSYK  
YLYINYNISNFQHFHIGQNKTNLQKVLNMRERLELSYLENLESFFHGDIKDISFNLLKVIKLLSCNKLGLSFLDSNMNGML  
LHLERINITDCEKVKTVILMESGNPSDPVEFTNLKRLRLNGLPQLQSFYSKIEQLSPDQEA EKDESRNFNDGLLFNEQ

>Cucsa.237070

METVIAILGTVEYAVAPIGRQVGYVSSYKKNINDLKDQLQNLVDTKTRLQHMVN EARSSAYNIQSDVSSWLNQVDKIIIE  
QSNIDILYKNENESNSKYCSNKNLNFHQYQMSKAKKMKVVISQIIEKRKLMFHQVGYPTPLSRIHGSSTSSSHGYDQILE  
SRTSIAKQIRDALVDCNVNKGVYGMGGVEKTTLLKQVTPLVMEKLFDHVIIVNVGQTLGVEGIIQAQIGDKLRLELNKK  
VESKEGRASLLQNKLEMESVLLVLDLWGLDLEEVGIPCRSESECEKGCILITSRDRDVL TNEMDTQVYFEVKPLSEK  
ESWEFFKNMIGEFDNKCIELIGKEMVKKCGGLPIALATIVKTLGKKEVPWKDALKQLKNPIAVDVKGVTDFVPPDDYEIS  
VEDLQIYAMSLRLLNQVNTWDEARNRVIKLVDDLKASSLLESNSRDNHVKMMDIVRDVAIYIASKEANMSTLSYGFGLS  
EWQEKDRHGFYRAIFGNCHNFYFPQNLEFPKLELLILDGHDWRGEKLCIYCSFFEGMKELKVLNLSRMCQQLLRPSIH  
SLENLQTLCSHCTFNIDDAISHLKQLLRIDKCPITLLPKSMSQLTQLKVLQVSNCPKVI PPNTLSLLKLQALDIW  
TSFNGWGEVSHNNKLINNARLSELKCLPHLTNLKIHILDIKILSDLIFLKNLKERFVIHV GELKMSQRLOGCEQYATT  
LMLKIITSSQIVSIDHHEFLSLEKMESENI VHADVFTSPFRKLRISIKVISCKRLRYLFSFSIFKGLVDLQRVFIFDCN  
MMDEILCMDESDSTIAVEGNSIECPQLKDLTII GAHNKMLWHKNGLAPNFFSKLQRISINSCNTLRYR

>Cucsa.237390

MVPSSPSSSAASSSSPSSPSIGKWKFDVLSFRGEDTRGGFTDHLKALTRKGI STFRDENEIEEGEHI PSNLLASIDA  
SRFAIVVVEDYASSRWCLEELARMFECKEVLPIFYKVDPSHVKNQSGTFEEAFVKHEKRFGRGDGKQSWRTFLTELA  
NTKAWLSQWSHESNIIIEITTKIWKRLKPNLTVIKEDQLVGINSKINKLSSLLIPNSDDDDADDDVIFVGIHGMGGIGK  
TTIARVCYERIRDEFEAHCFLSNVRENYIRTLGNLSCLQTKLSSMFS LKNNHIMDVEEGTAMINKAIFRKKTLVLDV  
DSSDQIKGLIPDNNSFGNGSRVITTRNADFLSNEFGVKRIFEMDELKYEALQLLSLSAFMKTCPKEGYLEHSSKIVK  
VGGHPLALKLLGSSLRNKNLSVWNEVIEEVGGGNIHEKIFKCLKVSYDGLDEREREIFLDVACFFNGKRREVVEEILNG  
CGFYAKTRIELLIQKSLTSLSYDNKLMHNLQEMGRKIVRDKHDRMLMCHKDIKSVVTEALIQSIFFKSSKNMVEFP  
ILFSRMHQRLRLNFRNVRNLRNKL EYSIPSELRYLKWGYPLEFLPIDSECKLIELHMCHSNLQKFWQEQKLVKLYI  
KLNSSQKLSKTPNFANIPNLKRLELEDCTSLVNIHPSIFTAEKLI FLSLKDCINLTNLP SHINIKVLEVLILSGCSKVK  
VPEFSGNTNRLQLHLDGTSISNLPSIASLSHLTILSLANCKMLIDISNAIEMTSLQSLDVS GCSKLSRKGKGDVNL  
GEVNVRETTTRRRRNDDCNIFKEIFLWLCNTPATGIFGIPSLAGLYSLTKLNLKDCNLEVIPQGI ECMVSLVELDLSGNN  
FSLHPTSISRHLNLRRLINQCKKLVHFPKLPRIIFLTSKDCISLKDIFDISKVDNLYIMKEVNLLNLCYQMANNKDFHR  
LIISSMQMFFRKGTFNIMIPGSEIPDWFTRKMGSSG

>Cucsa.237450

YDVFLSHRAKDTGRSFTSYLHEALTSQGI VVFI DEEDEDNGGKPSMEKTKAVDESRSIIVVFS ENYGNLVCMEIRKIRM  
CQKLGDLVLPVFIKIDPGDVRKQEGSF EKYFNEHEVNPNISIEEVKWRKSMNKVGNLSGWHVQDSQLTFSDDSRQLWV  
SYEPREVYPYRLNKWRNLRVSFLPSCSQTKVILCGARLLYKEDLDEFVDTIIDSVLGCSINLHEFYDGVFLNGMLSLIRS  
QKYDPNIEEEEEEEDEDEALMETKGGNYASTSSRVYRFSFLSLSCILIFEQTTKITPKMYDSRSCNNYKNST

>Cucsa.237500

MSTFDTFISFRGEDTRNTFTGHLYKALVDFGISTFMDDKLLIGDSLSEDLIGAIEKSGSFIVVLS ENYASSKWCLREL  
KIIGCMVEQKRRVLPVFIYHSPHDVHRQSGCFKKSFCYEEILQELNDREGDKYTKEVQEWRSALT KVGETGVVVTKDS  
LEAASIDKITEQLSSTLHQKLVNLDDELTELVDIERQLCKMDKLNLEPNVVRFIGIIGMGGIGKTTIAEVFYEKVAYKF  
GKNCFILVLDGVKEKSQLEQLVGNPNWFGGSKIITTRNRDVL RQPNYKDKMVEYKVEFLDNKSAMTLCQAFGSCDQ  
FPSKNFEDFSKEIVERVKGHPQVLRQIGSSLYDKGIEIWKELKLSLEEDYNNRIFKTLKISFDDLKGTSSQEVFLDFACFF

NEKKKESVIEILKSLDYRPHSEIQLLEDRCLEIEVRRDNTIFMPKCIQAMGQIEREADKRSRIWLPKDAHDVDFDEPHRVK  
DIKGVVLKLEEKQEEVKLEKGVFEDMRSKILEIGNVEVSGDFTHLSKQLRLLNWQSYPSQCLPLRFESRYLFQLLLPLS  
QTRQLWNGQKGFKEKLVINVSRSKNLRETPNFTKVPNLESLDLSYCPRLWKIDSSISRLNRLTLLDVSYCINLESPLFSR  
SCKSLARINYAGSGLEERGIYTYLSLW

>Cucsa.237520

MCRPPYWCWDDSWMFFDVGTYTKFKIQSIANSIGDHLRLKLQAKEENLFEMPLRLRTMKMLLGLGSNDVRFIIVGMSGI  
GKTTLAEMTYLRIFKPFVSA LRKPYFLHFVGRSIVSLQQQLLDQLAFLKPIDIQVLDENHGVELIMQHLSSLKNVLIVFD  
GITERSQLEMLAGSPDWFGAGSRIITTTNKNIFHHPNFKDKVQEYNVELLSHEAAFSLFCKLAFGDHPHTQNMDLDCNE  
MIEKVGRLPLALEKIAFSLYQONIDVWEHTLKNFHQVVYDNI FSDVLKSSYEGLEAESQQIFLDLACFLNGEKVDRVIQI  
LQGFYTSPTNLQLLDVDRCLIDILDGHIQMHILILCMGQEI VHRLEGNCCQTRIWLRRDARRLFHENNELKYIRGIVMD  
LEEEELVLRKAKAFADMSELRLIRINNVQLSEDI ECLSNKLTLLNWPGYPSKYL PSTFQPPSLELHLPGSNVERLWNGT  
QNFKNLKEIDASDSKFLVETPNFSEAPKLRRLILRNCGRNLNVHSSINSLHRLILLDMEGCVSFRSFSFPVTCCKSLKTLV  
LSNCGLEFFPEFGCVMGYLTELHIDGTSINKLSPSITNLLGLVLLNLRNCIRLSSLPTEICRLSSKTLIILNGCKNLDKI  
PPCLRYVKHLEELDIGGTSISTIPFLENLRILNCERLKSNIWHSAGLAAQYLRSLNDLNLSDCNLVDIEDIPNDLELFS  
LEILDLSNHFERLSESIKQLINLKVLYLNDCNKLVKQVPLPKSIKYVGGESLXG

>Cucsa.237540

MQSSSSSLDRPKMNYDVFISFRGRDVRHTFAGYLYDALNRLGKAFLDNKRFLIGDDLHDLFKIIDESRSIVVLS  
ASAKWCLRELTKIMDSMGTSMERVLVVFYHIDPSIVKQSGTFKTSFDEHEANVLKEIDNQEKEKRLKELQNWKSALKKI  
GNHTGVVITKNSSEVDIVNKIASQIFDAWRPKLEALNKNLVGMTSRLHMHMLGLGLDDVRFVAIVGMMGIGKTTIAQV  
VFDCILSKFEDCCFLTLPGGDSKQSLVSLQREMLSQIFHKEDFRIWHENHGVEMIKNRLS GRKVLIVLDGIEERRQLEML  
AGSIEWFGPGSRIITTRNKGLLCHPNYDEMKVYNVEELDHDSDALQLFLKHAFGSNHQNNDSFMDLSNEIVEKAKRPLA  
LRVIGSSLYGKDIVWRETLLKRLIKVDERNFVDVLKISYDGLGVESQVFLDITCFFNGKNEDRVIEIIESFGYSPNSEV  
QLLMQRCLIEVSHKKILVHDLILEMGREIVRKESLTQAEKQSRIWLHEDLYCRFAEKHDLMHIIQGI VLSLAKEMEESIEL  
DAESFSEMTRKRLILEISNVELDEDIEYLSPLLRINWLGYPKSLPPTFQSRYL FELLPHSHLLRIWDGKRFPKLKI  
DVSNSEHLRVPDFSGVPNLERLVLVLCNCVRLCEIHPINSINLKLILLDLEGCGDLKHF PANIRCKNLQTLKLSGTGLEIF  
PEIGHMEHLTHLHLDGSNI THFHPSIGYLTGLVFLDLSSCLGLSSLPCEIGNLKS LKTLKLYCKKLDKI PPSLANAESL  
ETLSISETSITHVPPSI IHCLKNLKTLDCEGLSHGIWKSLLPQFNINQTI TTGLGCLKALNLMGCKLMDEDI PEDLHCF  
SLETLDLSYNNFTTLPDLSHLKLLKTLNLCNCTELKDLPLPESLQYERFRSKFDLLLHGDKIPKFFSNQSKGNMTEIK  
LPQYLEKFRESIGVAVCALVVVDKRRRKLNEIIPERERYTKVVDLICKFKVDSYQIMPEHCHFTSQQKLLSEYASQFLWL  
SYIPLHGFNINWHYCTQFEIALETSCDELFGVKNCGLHLIHKHERMMIDKMVMESTVPSSTSHKGEKPEQIH

>Cucsa.237560

MASSTPKELSSSFSSPRFIFDVFLSFRGVDTRKNVTNRLYEALRRQGIIVFRDDDELERGKTIANTLTNSINQSRCTIVI  
LSKRYADSKWCLRELVEIVKCKNTFKQLVLVVYFKIKPSDVNSPTGIFEKFFVDFENDVKENFEEVQDWRKAMEVVGGLP  
PWPVNEQTETEKVKIVKHACDLLRPDLLSHDENLVGMNLRKKNMMLMGI GLDDKRFIIGWGMGIGKTTIAKAVFKSV  
AREFHGCSILENVKKTLLKNVGLVSLQEKLLSDTLMRGKVVQIKDGDGVEMIKKNLGNQKVFVVDLGDVHFSQV KDLGGE  
EWFVCGSRIITTRDEGLLSLGVDIRYVNESFDDDEALQLFCHAEAFGVKFPKKGYLDLDCMPFIEYAEGLPLAIKALGHS  
LHNRLFWSWEGAIRKLNNSLNQVYENLKISYDALGKEERRIFLYIACFLKGQNKDQVIDTFVVSFEIDAADGLLTRKNAA  
DVLICIKETAADALKKLEKSLITMLYDKIEMHNLHQKLGQEIFHEESSRKSRLWHREDMNHALRHKQGV EAIETIVLDS  
KEHGESHNAKFFSAMTGLVLRVHNVFLSGVLEYLSNKLRLLSWHGYPFRNLPSDFKPSELLELNQNSCIENI WRETE  
KLDKLVINLSNSKFLKTPDLSTVPNLERLVLNCGTRQLQELHQSVGT LKHLIFLDLKDCKSLKSICSNISLESKILIL  
SGCSRENFPPEIVGNMKLVKELHLDGTAIRKLHVSIGKLTSLVLLDLRYCKNLRTLPNAIGCLTSEIHLALGGCSKLDKI  
PDSLGNISCLKLDVSGTSHIPFTLRLLKNLEVLNCEGLSRKLCYSLFLWSTPRNNNSHSFGLWLTCLTNFSSVKV  
LNFSDCKLVDGDI PDDLSCSLHLFLDLSRNLFTNLPHLSQLINLRCLVLDNCSRLRS LKFPVSLLYVLARDCVSLKE  
HYNYNKEDRGPMQA EVRVLSYPSAKDQNSKISQLMISSMCTACENGG

>Cucsa.237410

MERRASIKSLSPPPYSISLPLPPLRNYDVFLSHRVKDTGSSFAADLHEALTNOGIVVFRDGI DDEDAEQPYVEEKMAVE  
ESRSSIVVFSENYGSFVCMKEVKGKIVTCKELMDQLVLPIFYKIDPGNVRKQEGNFKKYFNDHEANPKIDIEEVENWRYSM  
NQVHLSGWVHVDQSQSEESIINEVVKHIFNKLRPDLFRYDDKLVGISPRLHQINMLLGI GLDDVRFVGIWGMGIGKTT  
IARIYKSVSHLFDGCFYLDNVKEALKKEDIASLQKLLTGTLMKRNIDIPNADGATLIKRRISNIKALIILDDVNHLSQ  
LQKLAGGLDWFGSRSRVI VTRDEHLLISHGIERRYVNEVLKIEEGLQFLSQAFAFGEHTKEEYFDVCSQVVDYAGGLPL  
AIEVLGSSLRNKP MEDWINAVEKLEWVRDKEIEKLSI SYMLEKSEQKIFLDIACFFKRKSKQAIEIIESFGFPVAVLG  
LEILEEKCLITTPHDKLHMHDLIQEMGQEI VQRNFLNEPEKTRRLWLREDVNLALSRDQGEAIEGIMDDLDEEGESH  
AKAFSEMNTNLRVLRKLNHLSKEIEYLSDQLRFLNWHGYPLKTLPSNFNPTNLELEL PNSSIHHLWTASK

>Cucsa.237440

MTSLSPPPPPPPYSISLPLPPLRNYDVFLSHRVAKDTGCSFTSNLHEALTSQGI VVFDKEDGGKPLTEKMAVDESRS  
IVVFTKNYGLVCMKEIRKIRMCQKLRDQLVLPVYFKIDPGDVRKQEGSFKEYFNEHEVNPNISIEEVKWRKSMNKVGN  
LSGWSEGTINEVVNHI FNKLRPDLFRYDDKLVGISRRLHEINKLMGI GLDDVRLIGI WGMGIGKTTIARIYKSVSHL  
FDGCFYLDNVKETLKEGIASLQKLLTGALMKRNIDIPNAEGATLIKRRMSNIKALIILDDVDHLSQLQQLAGGSDWFG

SGSRVIVTTREEHLLISHGIKRRYNVEVLKIEEGIQLFSSQKAFGEDHPKKG YFDLCSQVVDYAGGLPLAIEVLGSSLRNK  
PMEDWIDAVKKLWEVRDKEIIEKLIKISYMLEKDDREIFLDIACFFKRKSKRQAIEIILESFGFPAVFGLDILKEKSLITT  
PHEKIQMHDLIQEMGQKIVNEKFPDEPEKRSRLWLREDITRALSHDQGTEAIKIGIMMDLDEEGESHNAKAFFSMTNLRI  
LKLNNVHLSSEEIEYLSQDLRFLNWHGYPLKTLPSNFPNPTNLELELPPNSSIHHLWTASKVHQNNSSN

>Cucsa.237470

MLLINYASNACTYLLSIGSLITTKRDLVHLQNLNYRDKVLEYKVELLSRESAYSLSFKNAFGGGPSDKDELCEIVEKVGRL  
LPLALKTIGSYLHNKELDVWNETLKRDLGVEQDFCDTVLQKX

>Cucsa.237480

MGKQTNHKLVLAKHTSLVGMENQVEKACNLLDLERSKNILFVGFIFGSSGIGKTTIAEVVYNTIVDEFQSGYFLYLSSKQN  
SSVPLQHQLSHLQSKETKIWDEDHGAQLIKHHMIHERNQIQRLVGSFNWFAPGSRVITARNRDLVHELNYRDQVQVEYK  
VELLSRERAYSLSFCENAFDGGGSPDKKDLCEIVEKVERLPLALRTIGSYLHNKDLVDVWNETWKRLDE

>Cucsa.237530

MGKQTDNKLVLSHKTSLVGMENQVKKVCNLLDLERSKDILFVGFIFGSSGIGKTTIAEVVYNTIIDEFQSGCFYLSSKQN  
SLVPLQHQLSHLQSKETKIWDEDHGAQLIKHHMSNRKVVIVLDGVDERNQIEKLVGSFNWFAPGSRVITATNRDLVHLQ  
LNYRDQVQVEYKVELLSRESAYSLSFCNAFGDGGSPDKNDLCEIVEKVGRLPLALRTIGSYLHNKDLVDVWNETLKRDLDEE  
QNYFDTILKRN

>Cucsa.239860

MAEFIINVASVIVTPIGKYVIKPIGNQLGYIVFYNRNKNEIKEQLESLETTKKDLDLRVE  
DAKSKAYTIFTKVSEWLVAADDEIKKSDELFSNPPCLNLFQRHQLSRKARKRATDIRRL  
KDGNNFLEVGCPAPLPDMMNTIVPEAYQTLGSKTSMAKQIKDALAKPEVRKVGVIYGMGG  
VGKTYLLKEVKLVLEEKLFDLVIDVTVGQSNVMMMQQIGDFLNKELPKSKEGRTSFL  
RNALVEMKGNILITFDDLNWNEFDIINDVGIPLSKEGCKTLVTSRFQNVLANKMNIKECFK  
VTCLDDEESWKFVKIIGDEFDAKMENIAKEVAKQCGGLPALDIIAKTLKRSRHINYW  
EGVLSKLNKSIIPVNIIDVGEKVYASLKLSEHLDGEEVKSFLLLCSVFPDDHGISVNDLQM  
YVMGMGLLKMVNTWKEARAEAHYLVEDLTSSSLQLRKNRDKVMHDIIVRDAIYIGPDFN  
MSTLYYGYSTSSKGLDEDEKCRSYRAIFVDCKKFCNLLPNLKLPKLELLILSFPFWGKDRN  
IDIMDAYFEGMENLKVLDIEGTSFLQPFWTPKLNLRRLCMSYCWCEIDITIGHLKQLEIL  
RISNCRGITELPNTSMSELQKLVLVVSHCFKLVIHTNIISMTKLEELDIQDCFKEWGE  
EVRYKNTWIPNAQLSELNCLSHLSILRVRVLKTLILSEALSSQMLKNLREFFIYVGTHEP  
KFHPFKSWSSFDKYEKNMSFNMSQIVSVNGTKLSILLEGTKRMLILNDSKGFANDIFKA  
IGNGYPLLKCLEIHDNSETPHLRGNDFTSLKRLVLDLDRMVMLESIIIPRHSIPNPFNKLF  
KIGRCEQLRNFFPLSVFKGLSNLRQIEIIECNMEEIIVSIEIEDHITITYSPLTSLRIER  
VNKLTISFCSTKSSIQQTIIVPLFDERRVSPPELKYLSIGRANLEMLWHKNGSSFSKLQTI  
EISDCKELRCVFPNSIATSLVFLDITLKIYGCLELLEMIIEIEKQKTSVGDTKVPLRYLSLG  
FLKNLKYVWDKDVDDVAFPNLKKVVGRCPKLKIIFPASFTYKMEIEELEMVEPFNYE  
IFPVDEASKLKEVALFQSLFTRMSCKQAVKERFWVMSKFFKLKLELFGCEDGKMISLP  
MEMNEVLYSIEELTIRGCLQVLDVIGNDYYIQRANLKKLKLNLPLKLMYVLKNMNQMTA  
TTFSKLVYLQVGGCNGMINLFSVSAKNLANLNSIEIYDCGEMRTVVAAKAEEEEENVEI  
VFSKLTGMFEHNLAGEFCYPGKCTLEFPLDITLRISKCDMKIFSYGITNTPTLKNIEI  
GEHNSLPVLPQTQINDIIHAFFTIEFTSICGVHTILSEKE

>Cucsa.248810

MADFLWTFAVEEMLKNVLKAVAGEQTGLAWGFQEHLSNLQKWLNAQAFLRDINTRKLLHLSVSIWVDHLQFLVYQAEDLL  
DEIVYEHLRQKVQTTMVKVCDFFSLSTDNVLIFRLDMAKMMTLVQLLEKHYNEAAPLGLVGIETVRPEIDVISQYRETI  
SELEDHKAIGRDVEVESIVKQVIDASNNQRTSILPIVGMGGGKTTLAKLVFNHELVRQRFDKTVWVCVSEPFIVNKILL  
DILKNVKGAYISDGRDSKEVLLRELQKEMLGQSYFLVLDVWNETFFLWDDLKYCLLKITGNSNNSILVTRSAEVAKIM  
GTCPSHLLSKLSDQCSLFPKESANAYGLSMTSNLGI IQKELVKKIGVPLAARVVLGRAVKFEGDVERWEEMLKNVLTTP  
LQENFVLSILKLSVDRLPSSSVKQCFAYCSIIFPKDFVFEKQELIQMMAQGFLOPQQGRYNNNTAMENVGDIYFNILLR  
CLFEFEDANKTRIRDMIGDYETREEYKMHDLVHDIAMETSRSYKDLHLNPSNISKKELQKEMINVAGKLRITDFIQKIPH  
NIDQTLFDVEIRNFVCLRVLKIISGDKLPKSIQGLKHLRYLEILSYSIELKLPESIVSLHNLQTLKFVYSVIEEFPNFTN  
LVSLRHLELGENADKTPPHLSQLTQLQTLSHFVIGFEEGFKITELGPLKNLKRCLCVLCEKVESKEEAKGADLAGKENL  
MALHLGWSMNRKDNLDLEVLEGLQPNINLQSLRITNFAGRHLPNNIFVENLREIHLSHCNCSCEKLPMLGQLNKLQICS  
FEGLOVIDNEFYGNPNQRRFFPKLEKFEISYMINLEQWKEVITNDESSNVTIFPNLKLKIWGPCKLLNIPKAFDENNM  
QHLESILSCCNKLTLPDGLQFCSSIEGLTIDKCSNLSINMRNPKLWYLIIGCVTQIPEQLQHLTALQFLSIQHFRCI  
EALPEWLGNYVCLQTLNLNWCKKLLKLPSTEAMLRRLTKLNKLHDLNICSFSSLLCFLIN

>Cucsa.249360

NLKRLLRVAKHLVEIDSQLEIEESVSHIGSEGIGKTTLAKDLYNKIATQFERCCFLQDVRREASKQYGLVQLHETLLCE  
ILKEDLKVVNCDKGINIIRSRLCLKVLIVFDDVDHHRQLEALVGELEDWFGGRGSKIIMLTRNGHLLSSHGFDEKHKHIEL

DQDHALVFLSLSSEATNYCKGLSVALVVLGSLRGRDQTRWSCILDEFENSLPKDIDKDLVQLSFDGLEDKANDIFLDISLHVIRPLDFGIMIMLMDLSLIMIESDRVQMHGLIQQMGCSIVRNESSQPEKRSRLWLVDIGEVFVNKSVRNSLPKLLKHVDLSYSTLLEKILDFSAASNLEELYLTNCTNLGMLDKSILSLNKLTVLNFEGCSNLKMLSRGYFMLSSELKELRPSYKKELEKIPDLAASNLRKRLYLQECTNLRVIVHKSIVGSLDKLGLLDSQCTNLVKLPSYLRKLSLYTLYLSGCCLESFPTIAENMKYLEELYLNFTAI

>Cucsa.251930

MADFIWTFALQEIILKKTLLHLATQQIRLASGFNHDLSKLLHSLFFFEAILRDVDRTKSDLQSVKIWVTKLQDLVLDAAEVVLDSELYEDLRREVDVNGNSKKRVRDFFSFSNPLMFRLLKMARKIRTIITQVLNEIKGEASAVGAIPTGGSDIIVADNGHIPETDSFLDEFEVVGRRADISRIVNVVVDNATHERITVIPIVGMGGKGTTLAKAVFNHELVIHAFDETIWVCVTATFDEKKILRAILESNTNFPSSGLDSDKDAILRRLQKELEGKRYFLVLDVWVNEAVKLWNNFKSLLKINTSINGRVLVTRSEEAGKIMETFPSSHVEKLSDDDECWSIFKERASANGLPLTPELEVIKNVLAEQFGGIPLVAKVLGGAVQFKKRTETWLMSTLETIMNPLQENENDVSSILRSLVDHLPNSSLKQCFAYFSNFPKGFNFEKEQLIQFVMAEGFIQPSDKVNPETMEDIGDKYFNILLARSLFQDIVKDENGKITHCKMHLLHDLAYSVSKCEALGSLNGLVDDVPQIRRLSLIGCEQNVTLPPRRSMVKLRSLFLDRDVFHGKILDFFKRLRVLNMSLCEIQNLPTSIGRLKHLRYLDVSNMIIKKLPKSIKLYKQLTLLRGCGRGEAPKFKIKLISLRHFYMNVRKPTTRHMPSYLRGLVDLQSLPFFVVGTKKGFHIEELGYLRNLRGKLLKLYNLELVRNKEEAMRADLVKDKKVYKLLKLVSEKRENNNNHDSVLEGLQPHINLQYLTVEAFMGELFNLTFVENLVQISLKNCSRCPRIPTFGHLPNLKVLEISGLHNKICIGTEFYGNEYEGSLFPKLRKRFHLSDMNNLGRWEEAAVPEVAVFPCELEELKILDPCPRLEIAPDYFSTLRTEIDDDVNNPISQITLQTFKLLGIHSGNLSGLPEELRGNLSLEEFKVVYLLHLKSFPTIQWLTDLKGGTKYDTKWNTNIQSHGLESYTSVNELSIVGHSDLTSTPDIKALYNLSSLTISGLKLPKGFHCLTCLKSLSIGGFMEGFDFRPLHLKSLLENLAMIDFILAEESTLPDELQHLTGLKHLKIVGFQGIESLPEWLGNLNSLESLSHIESCRKRELPEAMGCLAKLEEVRSFNCPELRVYQDESEWAKISYIPRFISFNWVWDEDDQRIQFKVCHKPS

>Cucsa.252030

MAGSTGANSSSNSSPAPPPPKILLAKPGLVPGGPINSKIGRGAGADDEPTSIRSRLPSLGSNLNLLSDSWDLHIDRFLPFLTENTEFKVVGIIGPPGVGKSTIMNEIYGYDGSSPGMLPPFPILEDVDRAMARHCTLGIEPRISSERIILLDTQPVFSPSVLAEIMRPGDSSSTVSVINGESPSAEALAEHLSIQLGILLASICNIVLVISEGVDLNMWHMLTVDLLKHGLPDPSSPISSHAQNSNVASEKEYKEKTSTSEYMATPIFVHAKVQDRDLVPQNILQLKRAFAYYFKTSSFMGDKFEKVHSEQLLSSVVPDTRNLDVDGDEDRLLLIIPNRNKDDSTRGQYESFNALWKLDRQVLSMNGASFPTVSRDWLKNVSVKIWESVKSPIVMEYARTLQSSGMFRR

>Cucsa.275630

QSSSSCSSNLKWSYDVFLSFRGEDTRNNFTSHLDRALREKGVNFFIDDKLERGGQISESLLKSIDGSKISIIIFSKNYASSTWCLDELVKIVQCMKSMGHIVFPVYKVDPSEVRKQTTGGFGEALAKHEANELMNTNKVQPWKEALTTAASLSGWDLATRKNREADLIHDLVKEVLSILNQTLHVAKHPVIGIDSQLRAVEELASHDVPDGVNMVGIHGMGGIGKTTLAKALYNKIAYQFEACCFLSNVRETLEQFKDLVQLQEKLLSEILKDNNAWKVGNVHKGNIIIRDRLCSKVKLIILDDVDKDEQLDALVGERDWFGRGSKIATTRDRHLLNHSFDIVYPIQLLDPKKSLELFSLHAFKQNHPSNYVDLSKFAVSCKGLPLALVILGSLHLKREKRIWKSLEHLENSLEPSVEAVFQIGFKELHERVKEIFLDISCFVGEDINYSKDVLKACDLNPDYGIILMDLSLVTVEDGKIQMHDLIQMGQTIIVRHESFEPAKRSRLWEAEGAIIKILKEKSVSDFRQCFYLLIAKDIYSEAFRNMKNRLLILQRVAYFPRNIFEYLPNSLKWIEWSTFYVNQSSISFSETPNFFATLNLEKLYLRGCTSLKGRMPSFRKFPKSHLKFSLKVLNLRDCLNLEEITDFSMASNLEILDNLTCFSLRIIHESIGSLDKLITLQDLCHNLEKLPSSLKLSLSDLSFTNCYKLEQLPEFDENMKSLRVMNLNGTAIRVLPSSIGYLIGLENLNLNDCANLTALPNEIHWLKSLEELHLRGC SKLDMFPFRSSLNFSQESSYFKLTVLDLKNCNISNSDFLETLSNVCTSLEKLNLSGNKFSCLPSLQNFKSLRFLELRNCKFLQNI IKLPHHLARVNASGSELLAIRPDCIADMIYHLANDRHHIKVLFPNNTTSKVFVSKRFSANVIMRTQGVYVMDRRFSCYT

>Cucsa.277260

MAEFLWTFVQEVLLKIVNFGAEQISLAWGLEKELSHLKKWLLKAQTIILADINTKSHHHSVGLWVEELHDIIEYADDLLDEIVYEQIRQVEQTGKLRKVRDSISPSKNSFLFGLKMAKMKKIITKTYEHYCEASPLGLVGDSPTESEALNQIRETTSILDVEVEGREAEVLEIILKLVIDSTDEDHISVISIVGMGGKGTTLAKMVFNHDAIKGHFDKTVWVCVSKPFIIVMKILEAIFQGLTNTSSGLNSREALNRLREEMQGGKYFLVLDVWDKENCALWDELIGNLKYIAGKSGNSIMVTTTRSVEVATMVKTVPYIHLKKSDDHCWALLKKSANANQLQMNKLENTKNIILVRKIGVPLIAKVLGGAVKFEEGGSEWMAKIESFARNISIEDKDFVLSILKLSVESLPHSALKQCFAYCSNFPQDYEFDKDEAIQMWIAEGFIQPEQERENLTMENIGEEYLNFLLSRSLFEDAICYDGRIVTFKIIDLMDHDIACAI SNHMKMSNPISWNGKSTRKLRTLICENEEAFHKIQTDIICLRVVLKWFDTNTLSTIMAKLIHLRYLDISNCNINKLLRDSICALYNLQTLKLGIECDLPKNLRNLVNLRHLEFKKFFDMGQMPSHMGNMIHLQTLSEFVVGLEKCKIDELGPKDLKGTTLTKNLQNVQNKDEAMAALVEKKYLRHLIFQWFLNLYDRGEYDEDDNKQVLEGLQPHKNVQSLDIRGFQGRVNLNNIFVENLVEIRLVDCGRCEVLPMLGQLPNLKKLEIISMNSVRSIGSEFYGVDCNDRNSSAFPQLNKFHICGLKQLQWDEATVFASNRFGCLKELILSGCHQLAKLPSGLEGCYSIEYLAIDGCPNMLMLNVQNLNLYLHDLIRGLKRLPDEFGLKRLTNLKKLRIGGCMQNYEFSPIHLSSQLVELELTDDGSSGETTQLPQQLQHLTNLKVLRKIADFDIEVLPWELGNLTCLATLVFLECKNLKELPSREAIQRLTKLDDLVIDGCPKLLLGEGDQERAKLSHLPSKCGGLKSVMINLLPKKSF

>Cucsa.292710

MGSSSVNGAESSSSCSSNSKWSYDVFLSFRGEDTRDKFISHLDLALRREGVNFIDDKLD

RGKQISKSLLSKSIIEGSRISIIIFSQNYASSTWCLDEVVKIIECMRSKKQTVLPVFYVNSP  
SEVVKQTGIFGEAFAYETNPLMTNKIQPWKEALTTAATLSGWDLGNWKNNEAHLIQDL  
VKKVSIKQQTQLLNVAKHPVAIDSQLKAIIEELASHGVSDNGVNMVGIHGMGGIGKTTLAK  
ALYNKITYQFEACCFLSNVRETSEQFNGLVQLQEKLLEIFKDNLKVNDVDKGMNI IKD  
RLCSRKVLMLVDDVDKDDQLDALVGGRDWFGGRGSKIIVTTRDRHLLLETYSFDKIHPQLL  
DCDKSLELFCWHAFKQSHPSRNYSELPELVRYCNGPLPLALVILGSLLCRQDIWWSKLD  
ELKNFPEPGIEAVFQISFKRLPENPPVKEIFLDICCFVGEDVSYSKNVLKACDPYLESR  
IIILMDLSLVTVEDGKIQMHDLIRQMGQMI VRRKSFKPEKRSRLWVAKEAVKMLIEKSGT  
HKVKAIKLDLRNNGLSIVEAEAFRNMENLRLLILQNAAKLPTNIFKYLPNIKWIEYSSSS  
VRWYFPISFVNVGGLVGLVINGVSNKHPIGIFEDCKMLKHVDLSYWRLLLEETPDFSAALN  
LEKLYLLSCKRLKMHGVSASLSKLVTLDEGCENLEKLPSSFMLKSLVNLNLSGCICKL  
KEIPDLSASNKLHLRECYHLRIIHDSAVGRFLDKLVIDLEGECKILERLPRYISNSK  
SIEVMNLDSCRKIEQLFDNYFEKFPShLKFESLKVNLNSYCQNLKEITDFSIASNLEIFD  
LRGCFSLRTHKSVGSLDQLIALKLDLDFCHQLEELPSCLRRLKSLDLSLSTNCKIEQLPEF  
DENMKSLEMMNLKGTAIRKLPSTIRYLIGLENLILSYCTNLSLPSSEIHLKSLKELDLR  
ECSRLDMLPSGSSLNFPQRSLSNLTILDLQNCNISNSDFLENLSNFCTTLKELNLSGNK  
FCCLPSLKNFTSLRLELRNCKFLRNIVKIPHLCKRMDASGCELLVISPDYIADMMFRNQ  
DLKLRNFKRELIVTYSEIPKFCNNQTTETYDAYYGKLVVVKIRAYVVTKNSSITVDMLE

>Cucsa.303290

MEMNIWDLEKSLHGSKPSLLRFANWLRAEMEVHGMSCFVSDRAKCRNSRKHVRVIERAMDASSFGVVILTCKSFQNPYTI  
ELRFFSGKKNLVP IFFDLS PGDCLARDIVEKRGDLWEKHGGDLWILYGGLEKEWKEAIEGLCRVDEWKFEAQNGNWRDCI  
LKAVMLLAMRLGRRSVVEHLTKWREKVEKEEFPFRNENF IGRKKELSELEFIFLGNIAGDSERDYFELKARPRRKNLTL  
GWSKSSSLEEKQRELPLEVRNKKGKEPIVWKESEKEIEMQSI EFPQRHRLKTKSGERYAKRRTAKI LYGKGIACISGD  
SGIGKTELLLEFAYRNHQYKMWLVWIGGESRYIRQNYLNLGSLFLEVDVGFNFSGKSKIKNFEEQEEAAISRIRTELMRN  
VPFLLIIDNLECEKDWDDHKLVMDDLPRFGGETHIIISTRIPRVMNLEPLKLSYLSGAEAMCLMQGSLRDYSMAEIDVLR  
VIEEKVGRITLGLAII GAILSELPIPTPRLDITNRMFPKQDWSGREAHVFRNRTFLMQLFVCFCSI FDHADGPRSLAT  
RMALASGWFGPAAIPI SOLT LAHKIPEKRQTRLWRKLLRSMACGLTSSYIKKSEAEATSMLLRFNMARSSTKQGCLHF  
NDLVKLYARKRGVNGFAQAMVQAVMNRPFIIHSEHIWAACFLFGFGRDPVVVELKVSELLYL I KEVVLPLAIRFTLTF  
SQCTTALELRLCTNALEAADQAFVTPVEKWFDKSLCWRPIQTNAQNLNPLYWQELALCRATLLETARLMLRGGQFDIGD  
DLIRKAI FIRTSISGEDHPDTISARETSLKLNRLIANFHVHSSP

>Cucsa.318890

LVFNHELVRQHFDKTVVWCVSEPFIVNKIILLDILQNLKGTISNGGDSKEVLLRELQKMHGQRYFLVLDDVWNENSFLWD  
ELKYCLLKITGNSKNSIVVTRSAEVAKIMGTCSGHLLSKLSDDDHCWSLFKESANAYGLSMTSNLEIIQKELVKKIGGIP  
LAARVLGRAVFKFEGDVERWEEMLNKVLSTPLKEENFILSILKLSVDRLPSSALKQCFSYCSIFPKDFVFEKQELIHMWMA  
QGFLQPQEGRNMTMETVGDIFYKILLSHCLFEDAHEHTKTEEYI PDLLEFETRPEEYKMHDLVHDIAIEISRDNQLQNLN  
SNIKKELQKEIKKVACKLRMVD FIRRIPCNIGLTFDFVEIRNPFVCLRVLKLSTLPSDKLPKSIQGLKHLRYLEIACYL  
GRLKFPESIVSLHNLQTLKFLYSYVEKFPNMFTNLTLSHFVIGFEEGCKITELGPLKNLQGLCSLLCLEKVESKEEANGT  
NLAEKEKLDLHLSWSNERKDNNNYNDLEVLLEGLQPNQNLQSLGIYNFAERRLPNKIFVENLSVIGLYGCNCEKLPMLG  
QLNLLKKEIYSFHGVQIIDNEFYGNDLNQRRFFPKLEIFVMCDMINLEQWKEVMTNDASSNVTIFSNLCKLEIRGCPKL  
TKLPNGLHFCSSIRRHLSLKKITLVEDELSNNSVTQISEQLQHLTALEFLS IENFGGIEALPEWLGNFVCLQTLSTLYNC  
KNLKKLPSTKAMRLTKLNQLYACKCPMLLLEEGDPERAKLSHFPMMLVQRNGYLKCI

>Cucsa.326910

KIPILHQLDYLFHYKQNIKEVEKKVEALGTAKGNAVFDGVSJKWLTIVKDVLEIAQQNENPSCFNVERYQLSRKAKRVE  
NIIELINEGNFGNKDNVGYVPSPDNTSPTLPTDYQIIASRTSIVEEIKEALANPNVDTVGVCGMGVGTALLNEVKKL  
VLEKNLFDRIQVEVGESKSVFNIQEQIKDELNMELNIECEEVRACRLRTHIAERKENMLFMLDDIWKEHDVEKEFGIPI  
KHVLNNEMNTEKTFEVNSLTNEESRNFFVTIVGESSVEDGHNIQQIAEDVVKECGGLPLALKILGKALGKRVQIWKDA  
LKSLKNPVTVTISGVSEQLYSCLQFSYDSTEDAEQVLLLCVFPDDYKIEVKDLQMYAMGMGLVKHINTWEDAGNRV  
LVDDLKSCYLLQDEQSKKGSDDCVQMHVDVHDFAKYVASKKDKMTSLTYRSGORLEYWQEEDDMHESYKAIYADCAKYC  
VYLPKVGVSPEPSIGNKIRIPTAFFERMKALRVLSVETMSISFEPSSWASINNLEALYELIKLVHLVLCDDDFNPSEFP  
PNIIESMTQLEELKFDGFKMNELSELNRLTRLFSLELRIONVEILLNELSVEKAKELEEFSCVDSVGFNTLLCNNHTV  
PYGNYNWYPRKELQIYIHNNQNYLDMPRGIENNPCILIFSCNKLTYPVPSHMLTLLVFLNTLEVHCKLVERIFEIEE  
WSGSGGAGDVNQVLVPFTIHLHSLFPLNKHVWNTDPNPTTSDLLPQCKESGDYKVS DA

>Cucsa.328080

MAESILCSLAGSIIITKLSFALQDLGLLWGFHDELDKLKGTVSALEAVLLDAEEKQSKSRAVKDWILKLDTFYDIDDL  
DVFSYESLKRQVMTKHRNTNKKVRIFFSKSNQIAFRKMSQKIKRVREKLDIAIAMDKTQFNLYENTREIQDDESTKRLE  
TTSFIREGEIIGRDDKKSIIHYLLDTNIHEDSVAVIAIIGMGLGKTALVQSIYGDEKVKKHFEELTMWVCISEFDVKV  
IEKIIESLTKKKREPDLQDLTLQSMVREKIDGKRYLLVMDVWVNVNRAKWI SLKRYLMGGAAGSRILITRTHQVAQTF  
ETILSHHLKELDEEKSWKLFKMAFSNESEVLENSKLVVIGKEIVTKLKGSPLAIRVIGSYLYSKKSEKDWLSFKDHELD  
TIMQQENEIQSILKISFNHLSSSLKHCFTYCALFSKDYHYEIRKNDLIKQWMAQGFIQPHNKKAMEDVGDYFEELGRS

FFQDIRKNKWEIKKFKMMDIIHDLACSVVENDCVLANDDTSIDKRTRHVSISAFNSMTRWKLITKSLIEAKNLRTLNY  
ARRHHIDLNSHLRLRTLNLFEHFVPKCIGMKHLRYINITYCIDFLPKAVTKLYHLETLIRGCELELRELSDDIKNLIN  
LRHLDIKDFKHVWSYMPKMGMSMTTLQTMNLFILGENKGGELSELNGLVNLRGSLSIQQQLQFCKPIGLENVKEYLEEKSR  
QKLELHWKTYQRESKIDDEDERVLESKPHSNLQKIRIEGYRGLKLCNWFSDSIVNLVFIKLFNCEKQLQPRFDRFPF  
LKHLHLEDLPSIEYIAINNYVSSMTTFPSLENLSIKLPLNKEWKGESIDQNTSFPTILRHLSQLKIHCRQLASIP  
QHGPLQSLDIRDISLQFELVIKMTATNIIFLPNDLFSNVTHLQSLVIGRCFNKMSFDDDNVRWKEGSLRTRLRCLFIP  
KLEYLPKGFQYLKALEHLELLWCENLACILGIEHLTSLSRLEISNCPNLTSLPEGMTQLISLTCLIIDDCPNLSTLPEGL  
HLLNTPRYAPLIFSH

>Cucsa.337180

MACCIYEQAENILIELKFPMYLRRMQYTMLSLKTIKDAEKEEYRHCLNDWLQKLSVFLQIEELLYESNREVKKQEAT  
GKWFVLPSPNFNSQIDQTKMMKLCDDLDEIASHMYGFNLTMETTHSFLSATEVSTRMLKPSWQLLYSLTAPKVFQDKR  
YHNFLDHFKKSTHGLFHVIGEPGIGKTTLAKFFYNLNTVTFPSRLWICVKEEFDQRLIKEMLSFSHCQVTCNLTTEKQL  
CFAVQQFLRDKKFLIVFQDISIKNLGNCISFKSLLGMGRGSKIIVTTQNEKIADAVGLKLYKNESQVVPSPPEATKPSD  
VNKDNMKHQTIFKVERLSKENSLSLKFVHAFETETQEAQIPNLTKIQEVIEQKCHGVPLAIKCLGGLLSKTSIAEWNGVID  
KLWEHEEEEDGNKSILPTLRLCYDQMPSHLQRCFLYCSQLKDRILSSNDVIQLWIASDLLPKENYLSLEKIGENYFKEL  
CSRCFLQEEYGFYGFYFKLHPLIEKLARLLTQKQVFEVTKTQSIATFTRDKVPPSAFLANACIDKFYLRLLHLGNANL  
QGISPAVENLVQLRYLDLQGNKKIKRPNISFKLKNLQTLILASCSALKELPNDIRQLTNLRYLWVTANNLRLHKNVGT  
MTSRFLAIGGCKLTLTLGVEFRLQRFTRLELPIVKKLPEWTRFTEFLRVLEIIDCPIEWNDDVLKSYKSLERFSIH  
GAVRTKNQIGGYNIDYRNFVRSRKKVKEVKTVCVY

>Cucsa.337190

MAYCIYYRAENILSELKNLPNYPRIEYTMLSLKSILMDAEEKQEQRGLQNWLEELQNVFSQIEGFIDEHKEEAYEGIG  
KQVLAPFSCSNQIARTWKMEKLFDDLNEVAAKMYEFNLTERHTGAIKTETNSFLTATEVSTRMLKPSWVKVLYPLTNPAP  
KQYQDERYRKILNDFKNPTLGFHFHIVGEAGIGKSTLAKFIYNDPEVEGMFPSRLWVCVKEEFDQRLMKEILNFSYSPAT  
CDNLTTKLCPDQYLRERTFLLVFDLSIKNLDNCSLFTSLLMMGKPGSKIIVTTQNEEIANAIELTMIYKVGQQSEQNR  
SQTALDVTKETANVNNADQFVQANPLGKIDQSIQSPQTIKFKVRLSEKDSLSLFDYASTYEGNEKDIMKTLKCKNGIPL  
AIKCLGSMLSLGPATKWMEDNERQKGDNESSSTFSILKLCYNEMPSHLKRCFLYCSQLPNSILSSNDVIQLWMANGLL  
RSRQENYLSLEDIGEYFKELCSRCFLQDVEEYGLGYWFKMPLIRELARLVQKRTKDLISIKPVTNVTSAFVPRDEVP  
SSSFLAECISKFQHLRLLYLGHDTLQEIPTIETLNHLTYLDLQGNKNIKRLPNAICNLQHLQTLILASCSALEELPKD  
ICKLSNLRYLWVTSNKLRLHKNVGTMTSLRFLAIGGCKLQDLFERPSCVLRLETLMIDCNSLQLLPNEMGSLISLQ  
LVIWSCKQLTLKGLEKVDLQRFTRIRELPEVNKLPEWLQRTSTETLRVLEIIDCPIKVEEKGKIHWHFEGTA

>Cucsa.337200

MAHCIYTQAENILTKLKDSPPYQKRIEYAMSSKAVLLDAEEKQEQRQLQNWLEELQNVFYQVEDSIDFEKWEIFKQKD  
IGKQVLAPFSCSNQISANKLKQCKRQVCELNNIATRMYEFLKVKHIDSISMETHTFPSASEISIRHLKPSWQLLY  
PLIDASRTYDEIYDGLNVFNETHVFFHIVGEAGIGKSTVARFLYNNHNVGKYTSRYWVCVEEFGFNKHLRQVEVYSHAD  
NKEICEDLTTEQLLSKVKRLLKVTETFLVFDLSITNLKDRSPLVNLLEEMGQHGSKIIVTTQTEEIANYLQDRGYKTE  
RRSKENLANGDRVSAHNQSLTKNTQNAVPGSQIEETADAIANKIYEHSLSLTEDAQNLEVPQPVTEDTNIIGLGINPDI  
PPIKQDDTEYQTIKFKLEKLSQSSRLFKEYAFRNRQEVENPELTKIVDQLEKCMGVPLAIKCLGSLLSSETSIAKWK  
IEEKLSLQEKKENGILHVLRVCYDQMPSQLKPCFLHCSQLPNDRIISSNDMIQLWMANGLLHSPPEKNSTMENIGEKYFM  
ELWSRYFIQIEEHLGLYWKLHPLIQKLAHKITQEQSEGGNNHPKEVTEIRSIAFQERNMVLPNASITEKCIWKYK  
LRLLYLSNADLQEIPIINSIGTLKYLRYLDLHGNTKIKHLPNISICNLQSLQTLILGSCSALEDLPKDIRNLSLRYLWVTN  
KLRLDKNGVGTMNLSRFLAIGGCNNLENLPERPDCLAGLETLMINYCTTLKLLPDEMRYLKSQNLMIWSCKQLTLNLKE  
VEFKLQRFTEIKELPRVERLPQWLENSAETLRLTQIINCPIMERQGIKYEAVENTIIYGAVRFEMAPPYDFEHRNLA  
VRNGNEEMHIYP

>Cucsa.338100

MAEIGTFVVQEVKLRIVKYGAEQIVVAWELENEVSLKDKLHDADTILEDINRKKSHPGN  
SVKRWVEKLEDIVHEADDLDELVEHLRRTVEHTEKFSKVSISISSINSFLFRKMAK  
KIKNITDTLNQHYCAASAFGLVGVETVTEIELALNQIRETTSILDFQVEGREAEVLELLK  
LAIDSTNEHMSVISIVGMGLGKTTLAKMIFNHREIEGHFDKIWVCVSKPPIVTKILE  
KIFQGLTKTCSGLESNKEALLGRLRKEMQDKNYFLVLDVVDNEKHLWDELRGCLKHIAG  
KPGNTIVMTTRNEEVATMVEPISYRLKKSNDQCWALFKESANANQLPMNSKLEIMKKE  
LVKMMGGVPLVAVLGGAVKFEETELEEDEHISWMTKVESIVRNISLEDKDFVLSILKL  
SVDSLNPVPLKQCVAYCSNFSQDYDFQKDDLIKMWIAQGFIQPGQGRDNLLMEDIQEY  
FNFLLSRSIFQDVTRDANKRIVGFKMHDLMDIACAISSHQNVESNPNLSGKSVRKLRT  
LICNDEVINYLNQKDIVCLRVLKVIFQSHTDLWIPIDKLIHLRYLDISECSINKLLES  
SLLYNLQTLKLGQSLPKNLRKLVNLRHLEFKMFGDTAMPDMGNLIHLQSLSGFLVGF  
KGCKIEELGPLKNLKGKLTTLNLWRVQNKDEAMAALVEKKNLRHLNLWFFETDKRGEDD  
EDGIVQVLEGLQPHKNLQSLIILGFRGKVLPTGIFVENLVKIRLGHFERCEVLPMLGQLP  
NLKELEIMYMSVRSIGNEFYGVDSHQNSVAFQPKKVSIEYEMNLEQWDEATVVLASN  
LFGCLKEVRIIRCNPPLKPSGLEGCHSLEYLSIRGCFNMLNLVQNLHKLHYHLEIDGLKR



LPKGMDGLTRLKELKIGGCMQNYEFSSVIHLASQLVELELSGRYGSVDTQLPQQQLHLTN  
LQVLKITQFDCIEALPEWIGNLISLKTLCASYCFKLKELPSREAILRLTKLENLDIFCEP  
KLLVGEQDERAKLSHLPKCVHKSE

>Cucsa.338190

MVGLLDSVAGNLLGRIIEAADRLEFRAIQSELKNLETDVNLNKARLRDAEEKQASNCELNELLKNLKNVFSRADIIEEL  
ECDYLKWRVQNRKNDVDDKGCQFSSCFSSNFLISPFNTGSKFQEDLKIITSELRSIEKAMSKFSLVEDEDEYIKKLGEM  
TLRTSITGSHAFARLLRLRREAILSNDVSI FGRDKIQESI IKELVNDEQKSPRILSIQDGGMGKTALAKLVYNADEVFD  
HFDKRMWVCVSEDFDIRRILREVLMSATGENVTVALTESRLRIRLQRYFFGKKILLVLDLDFGNLDPERVELKKIVKMG  
VGGSKIMITRSDETLNVATTHKIDKLEDETISMQIFEDTYGSEGLSEGLRDDLKYLKNLVAECGGAPLAIKCLAGLLSSKP  
SDGAKSPNVKDLSEKWKQEEANNGGVLALRLSYDLMPYKPCFLCFSVLPKDNVFFSFELIQLWMAQGI LPSGTKDN  
PEEVGEKYFKEFRDRRLLDVVEEHTLGYWFKIHSVHDLAVQKATEQKNLGNFHMLSFVDCDSIPSSSTNYDNTRFISIPV  
VGGAGPNINSDFKCIQFQRFLYLCNSSLEEIPSTIDTLKHLRCLDLRGSQRLKRLPESICKLQSLQTLVLAFCSEL  
EELPRNIKNLISLRFWIQTQARLEKDEIGSLTSLRFLAIGRSENTHLFEDINKLNSLKTIIIECKSLTLTPKGLN  
MKSICNMGWECDRFRFTFLASLHLKLLI LRELTAVSTLPNWSNLDGTLEVLEIGEFPTLRKLPWLLNFWELRILGI  
SNCPKLLKHSFPPELNYFCDKIEELRITFCGSLSKSLLKSMKEIEPESRVIFYIHTIYVDSKRMTPPVESTDEPKEAET  
KQDDAYNNASPPGTEQPSKTKHDDANNMSPHGIGLLESKQEHNTNNINEIETVKVCLGDNDAEAHQAM

>Cucsa.338650

MADLRPQHGNWYDVFSLFRGEDTRKNFTDHLIYAFK DAGINFRDDPEL ERGEDISSELERAI EGSKVAVVVSERYA  
ESGWCLEELVKIMECRRTLRLQVFPPIFYNVDPSCVRKQKGEFEEAFVKHEVRYFRDIDRVLKWRMALTEAANLSGWDLRN  
IANGHEAKFIRLIVEKVSKEVNSKYLFIALYPVGI ESRLKLLSHLHIGSNDVRFVGI LGMGGLGKTTVAKALYNQLYHN  
FEAKCFLSNIKAETSNIHLQKQLSSITNSTNINLGNIDQGI AVLQERLRCRLLLI LDDVDDLSQLTALATSRDLFAS  
GSRIITTRDRHLLNQLEVDEICSIDEMDDDEALELFSWHAFRNSYPSETFHQLSKQVVTYCGGLPLALEVLGSLFGRS  
REEWEDTLKLLKIPNDQIQKLLKISFDGLNDHTYKDI FLDVSCFFIGME RNYVEQILDGCGFFPRIGISVLLQRCLLTI  
GDKNRLMMHDLRLDMGREIVRENFPKYPERSRLFLHEEVLSVLTRQKGTDATEGLSLKLPFRFSKQKLSKAFNEMQKLR  
LLQLNFVDVNGDFKHISEEIRWVCWHGFPLKFLPKFEHMDKLVAMDLYSQIRFFWKESKFLKNLKFNLGHSHYLTHTP  
NFSKLPNLEILSLKDCKNLIELHPTIGELKALISLNLKDCCKSLNSLPNSFNLKSLQTLISGCSKLNLSLPEDLGEITSL  
ITLIADNTPIQKIPNTIINLKNLKYLSLCCGCKGSPSKSSFSMIWSWISPKKLSQNYTISILLPSSLQGLNSLRKLCCKNC  
NLSNNTIPKDIGLSLRELDLSENLFHSLPSTISGLLLETLLLDNCPQLIPNLPHLSSLYASNCTSLERTSDLSN  
VKMGSLMSNCPKLEIIPGLDKLLDSIRVIHMEGCSNMSNSFKDTILQGWTVSGFGGVC LPGAKEVPDWFAYKDEGHSIF  
LELPQYNNNSLEGFIVCIVYCSFNNTVSTDLPSLSVINYTKSSITTNKPLTNDVIMSTQDHLWQGHLSNKAFAKMEPGDE  
VEIIVDFGAEITVKKIGISLVFDKYVDQTMLEFASTCNDDDVVVDNQDETVSEKDGVEGSKRGFDENDDEGLKNSYQIPK  
RLKCEIDSNMKIDE

>Cucsa.338660

MANEFQAQHGWDWYDVFSLFRGEDTRKNFTDHLIYALKDAGINFRDDPELQRGEDISSGLERAI EGSKVAVIVFSERYA  
ESGWCLEELVKIMECRRTLRLQVLPVIFYNVDPSCVRKQKGEFEEAFVKHEKGDIDKVRWRMALTEAANVAGLGLTQNA  
NGHEAEFIRSVKMSI KEVNSNYLFIALYPVGI ESRIKLVPHLHIGSNDVVKFVGI LGIGGLGKTTI AKALYNQLHHNF  
EAACFLANIKQTPNQPNGLVHLQKQLSSITNSSNINFENMDRGIVVLQESLRRKLLLI LDDVDKISQLTALATRREC  
GSGSRIVITTRHRLLNQIEVDGICSIDVMDAEALQ LFSWHAFHNSYPSETFHQLSKRVVNYCGGLPLALQVLGCF LFG  
RSREEWQDTLKNLKKILDDQIQIKPKITFDTHNDHTCKDI YLVNQMLD GWSFPRIGDINRLVTS DLLRDHTQLFLPKEV  
RLSVLGPVKVRK

>Cucsa.368510

MLAFTVESVGLIVGSSFVLKLDTALELLSWYALKDKSPSSSYLELAEVAVGYCQGLPLALVLLDELVISLEKGVQDIFQ  
ISYEGLEYRLKELFVDICCLFVGDVVYCMKSMKARDLNPDYGITVLNDLSLISIENGKVQMHDLIPQMGHTIVRGESFD  
LENRSRLWVAKEGTDVAVKIKLDLSNDLSPTSIDAQAFKNMKNLKLLILRNITFSSHMFYGLNKFKWVLSFGIRFSSL  
PASFLVKEGLVGLDMQHCCI KYLGNRFENCERLKHVDLSYCELLEEIPDL SAVNLEYLYLRGCISLKTIHESVSSLNKL  
ITLDLEGCVNLEKLP SYLMLKSLDSFCLSDCRKLQRVPEFDENMKS LTRMILDYTAIEELPSSIEHLAKLEFLSLKGCAN  
LVALPSEIYLLRSLVELRLPGCSKLMFPCTTEQIFLLSKLTILD LKNCNLSNIDFLEPLSTDRLNDSGSREFILMNGM  
IPEWFNHQTTTSSISVSLQHCPCQKTQVLAACVIFKVDGDSCEAKASIKYDIFIDGESLKYFEITVRPSSKSEYMWLITTT  
PLTFSSVSMSCQVSTINKTYDNARATIRSLGVHIDVRGQQRQTX
